# Supplementary material for: Short-Term Load Forecasting with Improved CEEMDAN and GWO-Based Multiple Kernel ELM
Source: Hindawi journal article supplement (doi:10.1155/2020/1209547), 2020-02-25
Supplement: f1 [file 1209547.f1.xlsx]

## Sheet: README
Related instructions of data in our paper
Source	Australian Energy Market Operator 2014.
	https://www.aemo.com.au/Electricity/National-Electricity-Market-NEM/Data-dashboard#aggregated-data
Accessed Date	March 14,2019.
Columns Comments	SETTLEMENTDATE: Time of data collection with half-hour intervals.
	TOTALDEMAND: Demand data with MW as unit

## Sheet: NSW-Jan
SETTLEMENTDATE	TOTALDEMAND
2014-01-01 00:30:00	6840.01
2014-01-01 01:00:00	6580.75
2014-01-01 01:30:00	6212.79
2014-01-01 02:00:00	5988.92
2014-01-01 02:30:00	5752.86
2014-01-01 03:00:00	5630.41
2014-01-01 03:30:00	5553.19
2014-01-01 04:00:00	5529.09
2014-01-01 04:30:00	5565.83
2014-01-01 05:00:00	5484.19
2014-01-01 05:30:00	5525.1
2014-01-01 06:00:00	5592.28
2014-01-01 06:30:00	5721.54
2014-01-01 07:00:00	5894.01
2014-01-01 07:30:00	6085.46
2014-01-01 08:00:00	6305.44
2014-01-01 08:30:00	6533.38
2014-01-01 09:00:00	6699.19
2014-01-01 09:30:00	6890
2014-01-01 10:00:00	6950.86
2014-01-01 10:30:00	6992.74
2014-01-01 11:00:00	7073.98
2014-01-01 11:30:00	7207.9
2014-01-01 12:00:00	7277.21
2014-01-01 12:30:00	7335.66
2014-01-01 13:00:00	7397.04
2014-01-01 13:30:00	7450.04
2014-01-01 14:00:00	7514.89
2014-01-01 14:30:00	7554.21
2014-01-01 15:00:00	7576.42
2014-01-01 15:30:00	7592.57
2014-01-01 16:00:00	7627.29
2014-01-01 16:30:00	7683.62
2014-01-01 17:00:00	7753.16
2014-01-01 17:30:00	7727.26
2014-01-01 18:00:00	7671.31
2014-01-01 18:30:00	7569.79
2014-01-01 19:00:00	7501.48
2014-01-01 19:30:00	7600.76
2014-01-01 20:00:00	7628.05
2014-01-01 20:30:00	7472.89
2014-01-01 21:00:00	7328.43
2014-01-01 21:30:00	7319.01
2014-01-01 22:00:00	7178.02
2014-01-01 22:30:00	7155.88
2014-01-01 23:00:00	6978.81
2014-01-01 23:30:00	6812.06
2014-01-02	6662.73
2014-01-02 00:30:00	6468.34
2014-01-02 01:00:00	6261.57
2014-01-02 01:30:00	5968.8
2014-01-02 02:00:00	5779.25
2014-01-02 02:30:00	5628.16
2014-01-02 03:00:00	5666.42
2014-01-02 03:30:00	5679.12
2014-01-02 04:00:00	5704.67
2014-01-02 04:30:00	5837.21
2014-01-02 05:00:00	5943.18
2014-01-02 05:30:00	6177.8
2014-01-02 06:00:00	6442.13
2014-01-02 06:30:00	6719.98
2014-01-02 07:00:00	7098.93
2014-01-02 07:30:00	7450.78
2014-01-02 08:00:00	7798.44
2014-01-02 08:30:00	8079.39
2014-01-02 09:00:00	8323.89
2014-01-02 09:30:00	8625.91
2014-01-02 10:00:00	8859.01
2014-01-02 10:30:00	9062.05
2014-01-02 11:00:00	9196.69
2014-01-02 11:30:00	9302.51
2014-01-02 12:00:00	9466.27
2014-01-02 12:30:00	9642.49
2014-01-02 13:00:00	9755.79
2014-01-02 13:30:00	9800.7
2014-01-02 14:00:00	9811.47
2014-01-02 14:30:00	9774.58
2014-01-02 15:00:00	9726.61
2014-01-02 15:30:00	9668.02
2014-01-02 16:00:00	9575.57
2014-01-02 16:30:00	9508.25
2014-01-02 17:00:00	9447.79
2014-01-02 17:30:00	9198.89
2014-01-02 18:00:00	9051.96
2014-01-02 18:30:00	8805.7
2014-01-02 19:00:00	8647.03
2014-01-02 19:30:00	8655.11
2014-01-02 20:00:00	8618.43
2014-01-02 20:30:00	8381.97
2014-01-02 21:00:00	8092.8
2014-01-02 21:30:00	8097.01
2014-01-02 22:00:00	7870.25
2014-01-02 22:30:00	7744.5
2014-01-02 23:00:00	7596.11
2014-01-02 23:30:00	7416.42
2014-01-03	7254.94
2014-01-03 00:30:00	7072.75
2014-01-03 01:00:00	6805.58
2014-01-03 01:30:00	6444.85
2014-01-03 02:00:00	6222.57
2014-01-03 02:30:00	6109.63
2014-01-03 03:00:00	6068.21
2014-01-03 03:30:00	6052.55
2014-01-03 04:00:00	6075.42
2014-01-03 04:30:00	6197.18
2014-01-03 05:00:00	6277.49
2014-01-03 05:30:00	6489.74
2014-01-03 06:00:00	6740.61
2014-01-03 06:30:00	7025.9
2014-01-03 07:00:00	7409.36
2014-01-03 07:30:00	7723.09
2014-01-03 08:00:00	7959.8
2014-01-03 08:30:00	8197.96
2014-01-03 09:00:00	8260.05
2014-01-03 09:30:00	8351.06
2014-01-03 10:00:00	8425.88
2014-01-03 10:30:00	8446.94
2014-01-03 11:00:00	8478.85
2014-01-03 11:30:00	8585.43
2014-01-03 12:00:00	8687.43
2014-01-03 12:30:00	8768.58
2014-01-03 13:00:00	8878.71
2014-01-03 13:30:00	8964.59
2014-01-03 14:00:00	9057.99
2014-01-03 14:30:00	9229.39
2014-01-03 15:00:00	9419.61
2014-01-03 15:30:00	9463.68
2014-01-03 16:00:00	9562.18
2014-01-03 16:30:00	9549.15
2014-01-03 17:00:00	9539.62
2014-01-03 17:30:00	9238.12
2014-01-03 18:00:00	9146.45
2014-01-03 18:30:00	8925.47
2014-01-03 19:00:00	8833.83
2014-01-03 19:30:00	8775.43
2014-01-03 20:00:00	8850.18
2014-01-03 20:30:00	8749.22
2014-01-03 21:00:00	8486.38
2014-01-03 21:30:00	8454.97
2014-01-03 22:00:00	8249.98
2014-01-03 22:30:00	8139.21
2014-01-03 23:00:00	7972.56
2014-01-03 23:30:00	7673.7
2014-01-04	7481.53
2014-01-04 00:30:00	7200.9
2014-01-04 01:00:00	6951.69
2014-01-04 01:30:00	6627.44
2014-01-04 02:00:00	6359.47
2014-01-04 02:30:00	6174.64
2014-01-04 03:00:00	6085.32
2014-01-04 03:30:00	6029.12
2014-01-04 04:00:00	5976.92
2014-01-04 04:30:00	5976.67
2014-01-04 05:00:00	5961.36
2014-01-04 05:30:00	6061.31
2014-01-04 06:00:00	6189.15
2014-01-04 06:30:00	6422.2
2014-01-04 07:00:00	6718
2014-01-04 07:30:00	7008.38
2014-01-04 08:00:00	7265.03
2014-01-04 08:30:00	7568.2
2014-01-04 09:00:00	7670.2
2014-01-04 09:30:00	7756.2
2014-01-04 10:00:00	7740.78
2014-01-04 10:30:00	7789.26
2014-01-04 11:00:00	7805.04
2014-01-04 11:30:00	7796.19
2014-01-04 12:00:00	7786.68
2014-01-04 12:30:00	7813.84
2014-01-04 13:00:00	7837.21
2014-01-04 13:30:00	7877.27
2014-01-04 14:00:00	7923
2014-01-04 14:30:00	7949.53
2014-01-04 15:00:00	8040.2
2014-01-04 15:30:00	8061.81
2014-01-04 16:00:00	8108.13
2014-01-04 16:30:00	8081.39
2014-01-04 17:00:00	8103.22
2014-01-04 17:30:00	8034.54
2014-01-04 18:00:00	7997.16
2014-01-04 18:30:00	7852.48
2014-01-04 19:00:00	7758.12
2014-01-04 19:30:00	7744.6
2014-01-04 20:00:00	7821.36
2014-01-04 20:30:00	7710.58
2014-01-04 21:00:00	7566.28
2014-01-04 21:30:00	7471.97
2014-01-04 22:00:00	7402.38
2014-01-04 22:30:00	7354.57
2014-01-04 23:00:00	7159.21
2014-01-04 23:30:00	6889.98
2014-01-05	6741.84
2014-01-05 00:30:00	6606.69
2014-01-05 01:00:00	6408.53
2014-01-05 01:30:00	6111.45
2014-01-05 02:00:00	5976.88
2014-01-05 02:30:00	5851.06
2014-01-05 03:00:00	5821.72
2014-01-05 03:30:00	5781.62
2014-01-05 04:00:00	5733.63
2014-01-05 04:30:00	5779.82
2014-01-05 05:00:00	5772.07
2014-01-05 05:30:00	5842.39
2014-01-05 06:00:00	5899.24
2014-01-05 06:30:00	6143.95
2014-01-05 07:00:00	6342.07
2014-01-05 07:30:00	6653.67
2014-01-05 08:00:00	6878.39
2014-01-05 08:30:00	7126.85
2014-01-05 09:00:00	7293.85
2014-01-05 09:30:00	7425.69
2014-01-05 10:00:00	7496.72
2014-01-05 10:30:00	7550.1
2014-01-05 11:00:00	7542.19
2014-01-05 11:30:00	7540.06
2014-01-05 12:00:00	7632.02
2014-01-05 12:30:00	7668.5
2014-01-05 13:00:00	7712.67
2014-01-05 13:30:00	7769
2014-01-05 14:00:00	7863.43
2014-01-05 14:30:00	7959.45
2014-01-05 15:00:00	8114.97
2014-01-05 15:30:00	8210.5
2014-01-05 16:00:00	8266.46
2014-01-05 16:30:00	8345.45
2014-01-05 17:00:00	8439.06
2014-01-05 17:30:00	8466.4
2014-01-05 18:00:00	8425.45
2014-01-05 18:30:00	8319.93
2014-01-05 19:00:00	8169.75
2014-01-05 19:30:00	8130.59
2014-01-05 20:00:00	8241.08
2014-01-05 20:30:00	8144.72
2014-01-05 21:00:00	7924.37
2014-01-05 21:30:00	7780.16
2014-01-05 22:00:00	7555.29
2014-01-05 22:30:00	7360.31
2014-01-05 23:00:00	7129.02
2014-01-05 23:30:00	6883.83
2014-01-06	6749.71
2014-01-06 00:30:00	6560.68
2014-01-06 01:00:00	6370.15
2014-01-06 01:30:00	6129.32
2014-01-06 02:00:00	5975.21
2014-01-06 02:30:00	5884.3
2014-01-06 03:00:00	5822.19
2014-01-06 03:30:00	5877.17
2014-01-06 04:00:00	5885.86
2014-01-06 04:30:00	6045.63
2014-01-06 05:00:00	6184.42
2014-01-06 05:30:00	6493.9
2014-01-06 06:00:00	6818.66
2014-01-06 06:30:00	7152.68
2014-01-06 07:00:00	7548.45
2014-01-06 07:30:00	7893.93
2014-01-06 08:00:00	8152.49
2014-01-06 08:30:00	8358.82
2014-01-06 09:00:00	8456.88
2014-01-06 09:30:00	8510.56
2014-01-06 10:00:00	8505.51
2014-01-06 10:30:00	8546.47
2014-01-06 11:00:00	8547.52
2014-01-06 11:30:00	8649.01
2014-01-06 12:00:00	8724.81
2014-01-06 12:30:00	8760.01
2014-01-06 13:00:00	8837.21
2014-01-06 13:30:00	8905.88
2014-01-06 14:00:00	8986.12
2014-01-06 14:30:00	9055.08
2014-01-06 15:00:00	9088.62
2014-01-06 15:30:00	9194.2
2014-01-06 16:00:00	9245.2
2014-01-06 16:30:00	9222.02
2014-01-06 17:00:00	9194.77
2014-01-06 17:30:00	8911.45
2014-01-06 18:00:00	8791.17
2014-01-06 18:30:00	8507.62
2014-01-06 19:00:00	8334.4
2014-01-06 19:30:00	8264.62
2014-01-06 20:00:00	8358
2014-01-06 20:30:00	8219.83
2014-01-06 21:00:00	7996.47
2014-01-06 21:30:00	7942.86
2014-01-06 22:00:00	7760.95
2014-01-06 22:30:00	7672.28
2014-01-06 23:00:00	7502.47
2014-01-06 23:30:00	7295.62
2014-01-07	7082.36
2014-01-07 00:30:00	6934.78
2014-01-07 01:00:00	6741.41
2014-01-07 01:30:00	6401.98
2014-01-07 02:00:00	6172.54
2014-01-07 02:30:00	6053.72
2014-01-07 03:00:00	6020.2
2014-01-07 03:30:00	5990.12
2014-01-07 04:00:00	6074.43
2014-01-07 04:30:00	6208.31
2014-01-07 05:00:00	6412.18
2014-01-07 05:30:00	6698.52
2014-01-07 06:00:00	6987.84
2014-01-07 06:30:00	7284.63
2014-01-07 07:00:00	7645.3
2014-01-07 07:30:00	7889.27
2014-01-07 08:00:00	8057.17
2014-01-07 08:30:00	8199.31
2014-01-07 09:00:00	8215.27
2014-01-07 09:30:00	8234.5
2014-01-07 10:00:00	8278.34
2014-01-07 10:30:00	8262.9
2014-01-07 11:00:00	8239.74
2014-01-07 11:30:00	8180.92
2014-01-07 12:00:00	8115.01
2014-01-07 12:30:00	8150.13
2014-01-07 13:00:00	8171.79
2014-01-07 13:30:00	8177.59
2014-01-07 14:00:00	8174.38
2014-01-07 14:30:00	8105.78
2014-01-07 15:00:00	8145.61
2014-01-07 15:30:00	8135.08
2014-01-07 16:00:00	8093.7
2014-01-07 16:30:00	8108.41
2014-01-07 17:00:00	8102.88
2014-01-07 17:30:00	7951.9
2014-01-07 18:00:00	7888.56
2014-01-07 18:30:00	7770.95
2014-01-07 19:00:00	7673.7
2014-01-07 19:30:00	7677.44
2014-01-07 20:00:00	7637.74
2014-01-07 20:30:00	7510.6
2014-01-07 21:00:00	7326.46
2014-01-07 21:30:00	7377.89
2014-01-07 22:00:00	7241.46
2014-01-07 22:30:00	7204.19
2014-01-07 23:00:00	7123.93
2014-01-07 23:30:00	6982.85
2014-01-08	6861.33
2014-01-08 00:30:00	6661.36
2014-01-08 01:00:00	6474.14
2014-01-08 01:30:00	6168.38
2014-01-08 02:00:00	5957.49
2014-01-08 02:30:00	5853.2
2014-01-08 03:00:00	5794.83
2014-01-08 03:30:00	5802.42
2014-01-08 04:00:00	5834.03
2014-01-08 04:30:00	6025.61
2014-01-08 05:00:00	6184.15
2014-01-08 05:30:00	6465.9
2014-01-08 06:00:00	6794.77
2014-01-08 06:30:00	7079.19
2014-01-08 07:00:00	7394.26
2014-01-08 07:30:00	7597.12
2014-01-08 08:00:00	7797.03
2014-01-08 08:30:00	7997.17
2014-01-08 09:00:00	8112.92
2014-01-08 09:30:00	8149.9
2014-01-08 10:00:00	8186.97
2014-01-08 10:30:00	8196.95
2014-01-08 11:00:00	8208.71
2014-01-08 11:30:00	8176.96
2014-01-08 12:00:00	8189.41
2014-01-08 12:30:00	8177.78
2014-01-08 13:00:00	8182.87
2014-01-08 13:30:00	8195.97
2014-01-08 14:00:00	8174.19
2014-01-08 14:30:00	8123.3
2014-01-08 15:00:00	8116.17
2014-01-08 15:30:00	8105.95
2014-01-08 16:00:00	8161.9
2014-01-08 16:30:00	8136.26
2014-01-08 17:00:00	8146.18
2014-01-08 17:30:00	8008.81
2014-01-08 18:00:00	7899.4
2014-01-08 18:30:00	7736.66
2014-01-08 19:00:00	7649.05
2014-01-08 19:30:00	7685.56
2014-01-08 20:00:00	7677.14
2014-01-08 20:30:00	7577.06
2014-01-08 21:00:00	7392.03
2014-01-08 21:30:00	7442.42
2014-01-08 22:00:00	7346.68
2014-01-08 22:30:00	7328.43
2014-01-08 23:00:00	7227.51
2014-01-08 23:30:00	7069.67
2014-01-09	6895.69
2014-01-09 00:30:00	6732.71
2014-01-09 01:00:00	6521.35
2014-01-09 01:30:00	6264.59
2014-01-09 02:00:00	6038.77
2014-01-09 02:30:00	5918.44
2014-01-09 03:00:00	5827.45
2014-01-09 03:30:00	5814.12
2014-01-09 04:00:00	5903.64
2014-01-09 04:30:00	6073.34
2014-01-09 05:00:00	6252.31
2014-01-09 05:30:00	6585.4
2014-01-09 06:00:00	6862.85
2014-01-09 06:30:00	7161.37
2014-01-09 07:00:00	7550.39
2014-01-09 07:30:00	7763.77
2014-01-09 08:00:00	7974.2
2014-01-09 08:30:00	8186.62
2014-01-09 09:00:00	8289.72
2014-01-09 09:30:00	8349.92
2014-01-09 10:00:00	8368.13
2014-01-09 10:30:00	8362.73
2014-01-09 11:00:00	8379.02
2014-01-09 11:30:00	8310.11
2014-01-09 12:00:00	8291.48
2014-01-09 12:30:00	8262.09
2014-01-09 13:00:00	8194.9
2014-01-09 13:30:00	8195.94
2014-01-09 14:00:00	8177.21
2014-01-09 14:30:00	8224.06
2014-01-09 15:00:00	8199.26
2014-01-09 15:30:00	8209.72
2014-01-09 16:00:00	8224.69
2014-01-09 16:30:00	8264.21
2014-01-09 17:00:00	8302.37
2014-01-09 17:30:00	8180.15
2014-01-09 18:00:00	8152.65
2014-01-09 18:30:00	7994.63
2014-01-09 19:00:00	7945.84
2014-01-09 19:30:00	7960.33
2014-01-09 20:00:00	7965.97
2014-01-09 20:30:00	7743.71
2014-01-09 21:00:00	7569.68
2014-01-09 21:30:00	7569
2014-01-09 22:00:00	7462.84
2014-01-09 22:30:00	7416.39
2014-01-09 23:00:00	7318.7
2014-01-09 23:30:00	7171.28
2014-01-10	7076.26
2014-01-10 00:30:00	6882.61
2014-01-10 01:00:00	6643.74
2014-01-10 01:30:00	6382.43
2014-01-10 02:00:00	6174.32
2014-01-10 02:30:00	5999.27
2014-01-10 03:00:00	5961.35
2014-01-10 03:30:00	5955.93
2014-01-10 04:00:00	6003.26
2014-01-10 04:30:00	6172.83
2014-01-10 05:00:00	6336.28
2014-01-10 05:30:00	6668.52
2014-01-10 06:00:00	6953.08
2014-01-10 06:30:00	7323.92
2014-01-10 07:00:00	7645.94
2014-01-10 07:30:00	7962.9
2014-01-10 08:00:00	8167.96
2014-01-10 08:30:00	8415.1
2014-01-10 09:00:00	8507.55
2014-01-10 09:30:00	8604.2
2014-01-10 10:00:00	8592.85
2014-01-10 10:30:00	8594.83
2014-01-10 11:00:00	8713.29
2014-01-10 11:30:00	8699.95
2014-01-10 12:00:00	8684.31
2014-01-10 12:30:00	8740.59
2014-01-10 13:00:00	8796.12
2014-01-10 13:30:00	8855.29
2014-01-10 14:00:00	8927.53
2014-01-10 14:30:00	8881.15
2014-01-10 15:00:00	8907.01
2014-01-10 15:30:00	8929.87
2014-01-10 16:00:00	8975.64
2014-01-10 16:30:00	8898.92
2014-01-10 17:00:00	8753.28
2014-01-10 17:30:00	8515.3
2014-01-10 18:00:00	8375.83
2014-01-10 18:30:00	8275.65
2014-01-10 19:00:00	8162.34
2014-01-10 19:30:00	8122.12
2014-01-10 20:00:00	8204.36
2014-01-10 20:30:00	8110.33
2014-01-10 21:00:00	7937.45
2014-01-10 21:30:00	7930.01
2014-01-10 22:00:00	7824.98
2014-01-10 22:30:00	7844.85
2014-01-10 23:00:00	7736.58
2014-01-10 23:30:00	7494.98
2014-01-11	7345.32
2014-01-11 00:30:00	7098.36
2014-01-11 01:00:00	6801.48
2014-01-11 01:30:00	6507.57
2014-01-11 02:00:00	6247.58
2014-01-11 02:30:00	6096.16
2014-01-11 03:00:00	6012.05
2014-01-11 03:30:00	5948.73
2014-01-11 04:00:00	5977.43
2014-01-11 04:30:00	6037.09
2014-01-11 05:00:00	6043.27
2014-01-11 05:30:00	6136.1
2014-01-11 06:00:00	6284.02
2014-01-11 06:30:00	6502.79
2014-01-11 07:00:00	6809.15
2014-01-11 07:30:00	7163.47
2014-01-11 08:00:00	7455.87
2014-01-11 08:30:00	7771.24
2014-01-11 09:00:00	7847.82
2014-01-11 09:30:00	8023.3
2014-01-11 10:00:00	8119.18
2014-01-11 10:30:00	8200.75
2014-01-11 11:00:00	8278.83
2014-01-11 11:30:00	8373.4
2014-01-11 12:00:00	8503.18
2014-01-11 12:30:00	8610.62
2014-01-11 13:00:00	8707.63
2014-01-11 13:30:00	8796.15
2014-01-11 14:00:00	8902.47
2014-01-11 14:30:00	9064.86
2014-01-11 15:00:00	9198.82
2014-01-11 15:30:00	9219.34
2014-01-11 16:00:00	9235.59
2014-01-11 16:30:00	9158.73
2014-01-11 17:00:00	9125.06
2014-01-11 17:30:00	9006.63
2014-01-11 18:00:00	8928.22
2014-01-11 18:30:00	8700.21
2014-01-11 19:00:00	8482.05
2014-01-11 19:30:00	8437.12
2014-01-11 20:00:00	8458.91
2014-01-11 20:30:00	8308.91
2014-01-11 21:00:00	8123.04
2014-01-11 21:30:00	8073.61
2014-01-11 22:00:00	7861.75
2014-01-11 22:30:00	7716.54
2014-01-11 23:00:00	7441.77
2014-01-11 23:30:00	7144.7
2014-01-12	6986.71
2014-01-12 00:30:00	6815.75
2014-01-12 01:00:00	6612.8
2014-01-12 01:30:00	6357.65
2014-01-12 02:00:00	6143.47
2014-01-12 02:30:00	6075.04
2014-01-12 03:00:00	5965.04
2014-01-12 03:30:00	5978.59
2014-01-12 04:00:00	5955.21
2014-01-12 04:30:00	6006.48
2014-01-12 05:00:00	6066.64
2014-01-12 05:30:00	6052.49
2014-01-12 06:00:00	6122.53
2014-01-12 06:30:00	6340.75
2014-01-12 07:00:00	6620.39
2014-01-12 07:30:00	6951.03
2014-01-12 08:00:00	7177.12
2014-01-12 08:30:00	7487.66
2014-01-12 09:00:00	7663.04
2014-01-12 09:30:00	7864.38
2014-01-12 10:00:00	8002.44
2014-01-12 10:30:00	8103.16
2014-01-12 11:00:00	8203.2
2014-01-12 11:30:00	8316.17
2014-01-12 12:00:00	8464.24
2014-01-12 12:30:00	8514.91
2014-01-12 13:00:00	8629.39
2014-01-12 13:30:00	8693.33
2014-01-12 14:00:00	8792.89
2014-01-12 14:30:00	8870.05
2014-01-12 15:00:00	8882.13
2014-01-12 15:30:00	8817.3
2014-01-12 16:00:00	8777.05
2014-01-12 16:30:00	8676.97
2014-01-12 17:00:00	8733.08
2014-01-12 17:30:00	8692.65
2014-01-12 18:00:00	8578.3
2014-01-12 18:30:00	8436.38
2014-01-12 19:00:00	8328.46
2014-01-12 19:30:00	8279.03
2014-01-12 20:00:00	8336.42
2014-01-12 20:30:00	8193.63
2014-01-12 21:00:00	7984
2014-01-12 21:30:00	7872.49
2014-01-12 22:00:00	7642.5
2014-01-12 22:30:00	7473.78
2014-01-12 23:00:00	7249.02
2014-01-12 23:30:00	7008.97
2014-01-13	6893.85
2014-01-13 00:30:00	6688.86
2014-01-13 01:00:00	6542.88
2014-01-13 01:30:00	6267.64
2014-01-13 02:00:00	6135.38
2014-01-13 02:30:00	6071.71
2014-01-13 03:00:00	6015.89
2014-01-13 03:30:00	6027.31
2014-01-13 04:00:00	6090.87
2014-01-13 04:30:00	6269.79
2014-01-13 05:00:00	6501.65
2014-01-13 05:30:00	6919.56
2014-01-13 06:00:00	7275.59
2014-01-13 06:30:00	7715.12
2014-01-13 07:00:00	8121.69
2014-01-13 07:30:00	8473.22
2014-01-13 08:00:00	8692.55
2014-01-13 08:30:00	8958.4
2014-01-13 09:00:00	9052.7
2014-01-13 09:30:00	9168.43
2014-01-13 10:00:00	9230.59
2014-01-13 10:30:00	9177.45
2014-01-13 11:00:00	9225
2014-01-13 11:30:00	9259.31
2014-01-13 12:00:00	9309.12
2014-01-13 12:30:00	9463.48
2014-01-13 13:00:00	9579.18
2014-01-13 13:30:00	9652.45
2014-01-13 14:00:00	9730.1
2014-01-13 14:30:00	9781.51
2014-01-13 15:00:00	9875.26
2014-01-13 15:30:00	9904.99
2014-01-13 16:00:00	9986.19
2014-01-13 16:30:00	9885.81
2014-01-13 17:00:00	9907.59
2014-01-13 17:30:00	9633.52
2014-01-13 18:00:00	9457.18
2014-01-13 18:30:00	9201.66
2014-01-13 19:00:00	8981.67
2014-01-13 19:30:00	8881.88
2014-01-13 20:00:00	8903.36
2014-01-13 20:30:00	8740.03
2014-01-13 21:00:00	8461.15
2014-01-13 21:30:00	8356.32
2014-01-13 22:00:00	8089.79
2014-01-13 22:30:00	7933.2
2014-01-13 23:00:00	7824.98
2014-01-13 23:30:00	7539.48
2014-01-14	7428
2014-01-14 00:30:00	7175.98
2014-01-14 01:00:00	6898.19
2014-01-14 01:30:00	6605.67
2014-01-14 02:00:00	6380.14
2014-01-14 02:30:00	6264.92
2014-01-14 03:00:00	6246.33
2014-01-14 03:30:00	6242.75
2014-01-14 04:00:00	6323.84
2014-01-14 04:30:00	6550.07
2014-01-14 05:00:00	6662.05
2014-01-14 05:30:00	7028.81
2014-01-14 06:00:00	7348.27
2014-01-14 06:30:00	7784.65
2014-01-14 07:00:00	8181.72
2014-01-14 07:30:00	8544.75
2014-01-14 08:00:00	8794.4
2014-01-14 08:30:00	9027.17
2014-01-14 09:00:00	9196.99
2014-01-14 09:30:00	9427.15
2014-01-14 10:00:00	9497.03
2014-01-14 10:30:00	9537.04
2014-01-14 11:00:00	9695.76
2014-01-14 11:30:00	9774.73
2014-01-14 12:00:00	9842.51
2014-01-14 12:30:00	10028.2
2014-01-14 13:00:00	10187.8
2014-01-14 13:30:00	10326.9
2014-01-14 14:00:00	10459.8
2014-01-14 14:30:00	10532.4
2014-01-14 15:00:00	10586.4
2014-01-14 15:30:00	10702.1
2014-01-14 16:00:00	10796.5
2014-01-14 16:30:00	10861.9
2014-01-14 17:00:00	10834
2014-01-14 17:30:00	10530
2014-01-14 18:00:00	10377.5
2014-01-14 18:30:00	10051.1
2014-01-14 19:00:00	9781.61
2014-01-14 19:30:00	9645.35
2014-01-14 20:00:00	9686.39
2014-01-14 20:30:00	9458.54
2014-01-14 21:00:00	9170
2014-01-14 21:30:00	9000.42
2014-01-14 22:00:00	8652.51
2014-01-14 22:30:00	8554.05
2014-01-14 23:00:00	8272.96
2014-01-14 23:30:00	7984.32
2014-01-15	7756.39
2014-01-15 00:30:00	7586.55
2014-01-15 01:00:00	7305.39
2014-01-15 01:30:00	6997.26
2014-01-15 02:00:00	6738.6
2014-01-15 02:30:00	6554.06
2014-01-15 03:00:00	6545.54
2014-01-15 03:30:00	6545.11
2014-01-15 04:00:00	6571.06
2014-01-15 04:30:00	6742.36
2014-01-15 05:00:00	6921.35
2014-01-15 05:30:00	7284.05
2014-01-15 06:00:00	7701.23
2014-01-15 06:30:00	8162.29
2014-01-15 07:00:00	8554.06
2014-01-15 07:30:00	8711.89
2014-01-15 08:00:00	9051.56
2014-01-15 08:30:00	9459.34
2014-01-15 09:00:00	9873.55
2014-01-15 09:30:00	10006.3
2014-01-15 10:00:00	10221
2014-01-15 10:30:00	10314.9
2014-01-15 11:00:00	10405.9
2014-01-15 11:30:00	10505.6
2014-01-15 12:00:00	10726.3
2014-01-15 12:30:00	10939.3
2014-01-15 13:00:00	11119.1
2014-01-15 13:30:00	11282.7
2014-01-15 14:00:00	11414.3
2014-01-15 14:30:00	11539
2014-01-15 15:00:00	11682.5
2014-01-15 15:30:00	11726.2
2014-01-15 16:00:00	11801.1
2014-01-15 16:30:00	11758.5
2014-01-15 17:00:00	11686.9
2014-01-15 17:30:00	11317.1
2014-01-15 18:00:00	11183.7
2014-01-15 18:30:00	10851
2014-01-15 19:00:00	10507.5
2014-01-15 19:30:00	10307.3
2014-01-15 20:00:00	10229.7
2014-01-15 20:30:00	10032.1
2014-01-15 21:00:00	9621.51
2014-01-15 21:30:00	9446.07
2014-01-15 22:00:00	9039.95
2014-01-15 22:30:00	8795.29
2014-01-15 23:00:00	8497.36
2014-01-15 23:30:00	8209.59
2014-01-16	7912.91
2014-01-16 00:30:00	7633.64
2014-01-16 01:00:00	7358.91
2014-01-16 01:30:00	7044.42
2014-01-16 02:00:00	6843.8
2014-01-16 02:30:00	6711.11
2014-01-16 03:00:00	6657.23
2014-01-16 03:30:00	6625.95
2014-01-16 04:00:00	6663.09
2014-01-16 04:30:00	6847.55
2014-01-16 05:00:00	7012.75
2014-01-16 05:30:00	7427.52
2014-01-16 06:00:00	7792.52
2014-01-16 06:30:00	8227.63
2014-01-16 07:00:00	8746.56
2014-01-16 07:30:00	9084.07
2014-01-16 08:00:00	9477.11
2014-01-16 08:30:00	9833.61
2014-01-16 09:00:00	10049.5
2014-01-16 09:30:00	10259.3
2014-01-16 10:00:00	10443.9
2014-01-16 10:30:00	10575.5
2014-01-16 11:00:00	10735.3
2014-01-16 11:30:00	10870.2
2014-01-16 12:00:00	11056
2014-01-16 12:30:00	11227.5
2014-01-16 13:00:00	11364
2014-01-16 13:30:00	11439.6
2014-01-16 14:00:00	11564.1
2014-01-16 14:30:00	11657.4
2014-01-16 15:00:00	11769.4
2014-01-16 15:30:00	11771.8
2014-01-16 16:00:00	11845.8
2014-01-16 16:30:00	11784.5
2014-01-16 17:00:00	11768.2
2014-01-16 17:30:00	11420.8
2014-01-16 18:00:00	11286
2014-01-16 18:30:00	10942.3
2014-01-16 19:00:00	10633.7
2014-01-16 19:30:00	10364.2
2014-01-16 20:00:00	10339.9
2014-01-16 20:30:00	10002.6
2014-01-16 21:00:00	9608
2014-01-16 21:30:00	9422.33
2014-01-16 22:00:00	9063.07
2014-01-16 22:30:00	8750.91
2014-01-16 23:00:00	8451.88
2014-01-16 23:30:00	8160.21
2014-01-17	7936.84
2014-01-17 00:30:00	7611.25
2014-01-17 01:00:00	7349.84
2014-01-17 01:30:00	7062.81
2014-01-17 02:00:00	6815.23
2014-01-17 02:30:00	6675.15
2014-01-17 03:00:00	6632.84
2014-01-17 03:30:00	6580.03
2014-01-17 04:00:00	6671.83
2014-01-17 04:30:00	6786.87
2014-01-17 05:00:00	7006.97
2014-01-17 05:30:00	7341.67
2014-01-17 06:00:00	7743.39
2014-01-17 06:30:00	8166.32
2014-01-17 07:00:00	8692.28
2014-01-17 07:30:00	9041.87
2014-01-17 08:00:00	9397.78
2014-01-17 08:30:00	9704.63
2014-01-17 09:00:00	9896.13
2014-01-17 09:30:00	10091.5
2014-01-17 10:00:00	10312.3
2014-01-17 10:30:00	10417.3
2014-01-17 11:00:00	10671.9
2014-01-17 11:30:00	10729.5
2014-01-17 12:00:00	10861.9
2014-01-17 12:30:00	11063.8
2014-01-17 13:00:00	11137
2014-01-17 13:30:00	11225.3
2014-01-17 14:00:00	11409
2014-01-17 14:30:00	11500.8
2014-01-17 15:00:00	11557.2
2014-01-17 15:30:00	11553.9
2014-01-17 16:00:00	11568.4
2014-01-17 16:30:00	11495.5
2014-01-17 17:00:00	11315.6
2014-01-17 17:30:00	10919.7
2014-01-17 18:00:00	10703.9
2014-01-17 18:30:00	10340.3
2014-01-17 19:00:00	10025.3
2014-01-17 19:30:00	9773.02
2014-01-17 20:00:00	9713.78
2014-01-17 20:30:00	9514.7
2014-01-17 21:00:00	9239.98
2014-01-17 21:30:00	9112.74
2014-01-17 22:00:00	8836.13
2014-01-17 22:30:00	8644.01
2014-01-17 23:00:00	8380.77
2014-01-17 23:30:00	8035.17
2014-01-18	7839.4
2014-01-18 00:30:00	7568.36
2014-01-18 01:00:00	7247.04
2014-01-18 01:30:00	6856.99
2014-01-18 02:00:00	6645.89
2014-01-18 02:30:00	6492.05
2014-01-18 03:00:00	6418.01
2014-01-18 03:30:00	6389.22
2014-01-18 04:00:00	6375.41
2014-01-18 04:30:00	6418.14
2014-01-18 05:00:00	6481.77
2014-01-18 05:30:00	6576.2
2014-01-18 06:00:00	6679.87
2014-01-18 06:30:00	6981.41
2014-01-18 07:00:00	7320.99
2014-01-18 07:30:00	7710.1
2014-01-18 08:00:00	8017.41
2014-01-18 08:30:00	8340.23
2014-01-18 09:00:00	8483.71
2014-01-18 09:30:00	8682.05
2014-01-18 10:00:00	8846.03
2014-01-18 10:30:00	9020.62
2014-01-18 11:00:00	9189.37
2014-01-18 11:30:00	9315.38
2014-01-18 12:00:00	9582.72
2014-01-18 12:30:00	9797.59
2014-01-18 13:00:00	9967.66
2014-01-18 13:30:00	10146.4
2014-01-18 14:00:00	10270
2014-01-18 14:30:00	10422.5
2014-01-18 15:00:00	10499.9
2014-01-18 15:30:00	10401.6
2014-01-18 16:00:00	10395.9
2014-01-18 16:30:00	10282.6
2014-01-18 17:00:00	10254.7
2014-01-18 17:30:00	10127.4
2014-01-18 18:00:00	9982.24
2014-01-18 18:30:00	9693.62
2014-01-18 19:00:00	9465.9
2014-01-18 19:30:00	9349.63
2014-01-18 20:00:00	9284.76
2014-01-18 20:30:00	9066.98
2014-01-18 21:00:00	8831.33
2014-01-18 21:30:00	8665.04
2014-01-18 22:00:00	8374.22
2014-01-18 22:30:00	8190.32
2014-01-18 23:00:00	7895.07
2014-01-18 23:30:00	7565.07
2014-01-19	7308.24
2014-01-19 00:30:00	7034.54
2014-01-19 01:00:00	6876.16
2014-01-19 01:30:00	6583.57
2014-01-19 02:00:00	6420.31
2014-01-19 02:30:00	6318.67
2014-01-19 03:00:00	6229.47
2014-01-19 03:30:00	6192.95
2014-01-19 04:00:00	6135.36
2014-01-19 04:30:00	6170.12
2014-01-19 05:00:00	6163.15
2014-01-19 05:30:00	6173.2
2014-01-19 06:00:00	6247.73
2014-01-19 06:30:00	6525.3
2014-01-19 07:00:00	6796.65
2014-01-19 07:30:00	7095.2
2014-01-19 08:00:00	7348.63
2014-01-19 08:30:00	7623.27
2014-01-19 09:00:00	7852.4
2014-01-19 09:30:00	8087.09
2014-01-19 10:00:00	8218.66
2014-01-19 10:30:00	8307.62
2014-01-19 11:00:00	8398.78
2014-01-19 11:30:00	8522.37
2014-01-19 12:00:00	8611.08
2014-01-19 12:30:00	8688.9
2014-01-19 13:00:00	8735.84
2014-01-19 13:30:00	8882.57
2014-01-19 14:00:00	8966.31
2014-01-19 14:30:00	9055.74
2014-01-19 15:00:00	9077.71
2014-01-19 15:30:00	9106.04
2014-01-19 16:00:00	9132.78
2014-01-19 16:30:00	9067.06
2014-01-19 17:00:00	8968.69
2014-01-19 17:30:00	8916.21
2014-01-19 18:00:00	8778.64
2014-01-19 18:30:00	8621.79
2014-01-19 19:00:00	8518.31
2014-01-19 19:30:00	8517.17
2014-01-19 20:00:00	8557.95
2014-01-19 20:30:00	8395.5
2014-01-19 21:00:00	8197.03
2014-01-19 21:30:00	8108.12
2014-01-19 22:00:00	7835.29
2014-01-19 22:30:00	7720.56
2014-01-19 23:00:00	7510.32
2014-01-19 23:30:00	7225.21
2014-01-20	7104.39
2014-01-20 00:30:00	6939.28
2014-01-20 01:00:00	6704.94
2014-01-20 01:30:00	6494.55
2014-01-20 02:00:00	6383.5
2014-01-20 02:30:00	6303.58
2014-01-20 03:00:00	6265.83
2014-01-20 03:30:00	6282.01
2014-01-20 04:00:00	6321.52
2014-01-20 04:30:00	6566.61
2014-01-20 05:00:00	6833.46
2014-01-20 05:30:00	7238.51
2014-01-20 06:00:00	7640.43
2014-01-20 06:30:00	8090.19
2014-01-20 07:00:00	8550.66
2014-01-20 07:30:00	8934.96
2014-01-20 08:00:00	9307.67
2014-01-20 08:30:00	9510.42
2014-01-20 09:00:00	9631.19
2014-01-20 09:30:00	9740.16
2014-01-20 10:00:00	9864.6
2014-01-20 10:30:00	9895.53
2014-01-20 11:00:00	9989.68
2014-01-20 11:30:00	9971.07
2014-01-20 12:00:00	9980.02
2014-01-20 12:30:00	9997.26
2014-01-20 13:00:00	10018.2
2014-01-20 13:30:00	10024.9
2014-01-20 14:00:00	10059.6
2014-01-20 14:30:00	10035.1
2014-01-20 15:00:00	10013.1
2014-01-20 15:30:00	9929.88
2014-01-20 16:00:00	9942.95
2014-01-20 16:30:00	9828.83
2014-01-20 17:00:00	9780.03
2014-01-20 17:30:00	9520.39
2014-01-20 18:00:00	9357.42
2014-01-20 18:30:00	9113.94
2014-01-20 19:00:00	8964.42
2014-01-20 19:30:00	8897.63
2014-01-20 20:00:00	8835.85
2014-01-20 20:30:00	8617.21
2014-01-20 21:00:00	8372.15
2014-01-20 21:30:00	8303.27
2014-01-20 22:00:00	8067.4
2014-01-20 22:30:00	7999.96
2014-01-20 23:00:00	7813.9
2014-01-20 23:30:00	7638.56
2014-01-21	7461.31
2014-01-21 00:30:00	7276.55
2014-01-21 01:00:00	7071.05
2014-01-21 01:30:00	6723.1
2014-01-21 02:00:00	6564.61
2014-01-21 02:30:00	6426.12
2014-01-21 03:00:00	6381.08
2014-01-21 03:30:00	6418.01
2014-01-21 04:00:00	6489.01
2014-01-21 04:30:00	6699.04
2014-01-21 05:00:00	6946.25
2014-01-21 05:30:00	7394.67
2014-01-21 06:00:00	7751.63
2014-01-21 06:30:00	8203.01
2014-01-21 07:00:00	8591
2014-01-21 07:30:00	8876.14
2014-01-21 08:00:00	9045.14
2014-01-21 08:30:00	9041.55
2014-01-21 09:00:00	9075.78
2014-01-21 09:30:00	9272.42
2014-01-21 10:00:00	9569.68
2014-01-21 10:30:00	9571.87
2014-01-21 11:00:00	9585.01
2014-01-21 11:30:00	9581
2014-01-21 12:00:00	9556.98
2014-01-21 12:30:00	9618.53
2014-01-21 13:00:00	9610.76
2014-01-21 13:30:00	9656.73
2014-01-21 14:00:00	9723.96
2014-01-21 14:30:00	9755.38
2014-01-21 15:00:00	9779.89
2014-01-21 15:30:00	9816.5
2014-01-21 16:00:00	9799.48
2014-01-21 16:30:00	9777.75
2014-01-21 17:00:00	9718.9
2014-01-21 17:30:00	9437.14
2014-01-21 18:00:00	9271.05
2014-01-21 18:30:00	9038.97
2014-01-21 19:00:00	8955.14
2014-01-21 19:30:00	8937.98
2014-01-21 20:00:00	8971.03
2014-01-21 20:30:00	8774.59
2014-01-21 21:00:00	8507.96
2014-01-21 21:30:00	8439.65
2014-01-21 22:00:00	8281
2014-01-21 22:30:00	8159.32
2014-01-21 23:00:00	7968.78
2014-01-21 23:30:00	7749.89
2014-01-22	7560.7
2014-01-22 00:30:00	7374.18
2014-01-22 01:00:00	7098.95
2014-01-22 01:30:00	6833.66
2014-01-22 02:00:00	6513.95
2014-01-22 02:30:00	6389.94
2014-01-22 03:00:00	6350.88
2014-01-22 03:30:00	6358.2
2014-01-22 04:00:00	6427.6
2014-01-22 04:30:00	6599.56
2014-01-22 05:00:00	6842.77
2014-01-22 05:30:00	7300.97
2014-01-22 06:00:00	7630.86
2014-01-22 06:30:00	7968.18
2014-01-22 07:00:00	8349.91
2014-01-22 07:30:00	8718.7
2014-01-22 08:00:00	8911.22
2014-01-22 08:30:00	9107.63
2014-01-22 09:00:00	9230.82
2014-01-22 09:30:00	9313.84
2014-01-22 10:00:00	9305.27
2014-01-22 10:30:00	9286.12
2014-01-22 11:00:00	9203.05
2014-01-22 11:30:00	9188.8
2014-01-22 12:00:00	9187.66
2014-01-22 12:30:00	9151.9
2014-01-22 13:00:00	9212.67
2014-01-22 13:30:00	9177.94
2014-01-22 14:00:00	9150.06
2014-01-22 14:30:00	9162.71
2014-01-22 15:00:00	9051.84
2014-01-22 15:30:00	8996.15
2014-01-22 16:00:00	8962.4
2014-01-22 16:30:00	8945.81
2014-01-22 17:00:00	8860.11
2014-01-22 17:30:00	8656.57
2014-01-22 18:00:00	8622.93
2014-01-22 18:30:00	8428.27
2014-01-22 19:00:00	8343.37
2014-01-22 19:30:00	8385.21
2014-01-22 20:00:00	8395.42
2014-01-22 20:30:00	8281.26
2014-01-22 21:00:00	8037.34
2014-01-22 21:30:00	8048.32
2014-01-22 22:00:00	7844.54
2014-01-22 22:30:00	7772
2014-01-22 23:00:00	7658.35
2014-01-22 23:30:00	7465.91
2014-01-23	7306.88
2014-01-23 00:30:00	7127.08
2014-01-23 01:00:00	6924.22
2014-01-23 01:30:00	6571.72
2014-01-23 02:00:00	6332.17
2014-01-23 02:30:00	6203.51
2014-01-23 03:00:00	6193.37
2014-01-23 03:30:00	6194.57
2014-01-23 04:00:00	6249.61
2014-01-23 04:30:00	6427.45
2014-01-23 05:00:00	6664.55
2014-01-23 05:30:00	7048.48
2014-01-23 06:00:00	7463.01
2014-01-23 06:30:00	7888.71
2014-01-23 07:00:00	8261.97
2014-01-23 07:30:00	8546.1
2014-01-23 08:00:00	8752.23
2014-01-23 08:30:00	8907.57
2014-01-23 09:00:00	9050.18
2014-01-23 09:30:00	9084.66
2014-01-23 10:00:00	9180.37
2014-01-23 10:30:00	9100.1
2014-01-23 11:00:00	9123.67
2014-01-23 11:30:00	9134.26
2014-01-23 12:00:00	9161.98
2014-01-23 12:30:00	9205.56
2014-01-23 13:00:00	9242.85
2014-01-23 13:30:00	9188.85
2014-01-23 14:00:00	9163.42
2014-01-23 14:30:00	9110.16
2014-01-23 15:00:00	9089.95
2014-01-23 15:30:00	9060.75
2014-01-23 16:00:00	9077.94
2014-01-23 16:30:00	9063.21
2014-01-23 17:00:00	9058.19
2014-01-23 17:30:00	8867.67
2014-01-23 18:00:00	8786.67
2014-01-23 18:30:00	8600.61
2014-01-23 19:00:00	8572.39
2014-01-23 19:30:00	8613.79
2014-01-23 20:00:00	8673.69
2014-01-23 20:30:00	8493.69
2014-01-23 21:00:00	8230.93
2014-01-23 21:30:00	8188.57
2014-01-23 22:00:00	8012.19
2014-01-23 22:30:00	7939.72
2014-01-23 23:00:00	7815.37
2014-01-23 23:30:00	7655.23
2014-01-24	7499.76
2014-01-24 00:30:00	7264.63
2014-01-24 01:00:00	7039.23
2014-01-24 01:30:00	6699.59
2014-01-24 02:00:00	6493.86
2014-01-24 02:30:00	6397.72
2014-01-24 03:00:00	6313.53
2014-01-24 03:30:00	6352.99
2014-01-24 04:00:00	6375.05
2014-01-24 04:30:00	6596.79
2014-01-24 05:00:00	6799.3
2014-01-24 05:30:00	7197.56
2014-01-24 06:00:00	7548.95
2014-01-24 06:30:00	7908.97
2014-01-24 07:00:00	8303.54
2014-01-24 07:30:00	8655.16
2014-01-24 08:00:00	8939.21
2014-01-24 08:30:00	9137.53
2014-01-24 09:00:00	9228.08
2014-01-24 09:30:00	9316.97
2014-01-24 10:00:00	9250.92
2014-01-24 10:30:00	9239.39
2014-01-24 11:00:00	9290.97
2014-01-24 11:30:00	9214.22
2014-01-24 12:00:00	9209.8
2014-01-24 12:30:00	9249.92
2014-01-24 13:00:00	9251.53
2014-01-24 13:30:00	9222.24
2014-01-24 14:00:00	9199.74
2014-01-24 14:30:00	9127.89
2014-01-24 15:00:00	9089.88
2014-01-24 15:30:00	9110.49
2014-01-24 16:00:00	9076.65
2014-01-24 16:30:00	9023.95
2014-01-24 17:00:00	8930.51
2014-01-24 17:30:00	8679.69
2014-01-24 18:00:00	8623.09
2014-01-24 18:30:00	8456.11
2014-01-24 19:00:00	8419.97
2014-01-24 19:30:00	8439.28
2014-01-24 20:00:00	8490.56
2014-01-24 20:30:00	8287.37
2014-01-24 21:00:00	8098.44
2014-01-24 21:30:00	8094.72
2014-01-24 22:00:00	7924.92
2014-01-24 22:30:00	7853.53
2014-01-24 23:00:00	7714.37
2014-01-24 23:30:00	7490.41
2014-01-25	7333.78
2014-01-25 00:30:00	7136.27
2014-01-25 01:00:00	6890.31
2014-01-25 01:30:00	6551.96
2014-01-25 02:00:00	6334.08
2014-01-25 02:30:00	6120.42
2014-01-25 03:00:00	6027.45
2014-01-25 03:30:00	5991.32
2014-01-25 04:00:00	6017.28
2014-01-25 04:30:00	6033.31
2014-01-25 05:00:00	6083.46
2014-01-25 05:30:00	6210.72
2014-01-25 06:00:00	6350.74
2014-01-25 06:30:00	6658.4
2014-01-25 07:00:00	6983.39
2014-01-25 07:30:00	7306.79
2014-01-25 08:00:00	7594.98
2014-01-25 08:30:00	7848.04
2014-01-25 09:00:00	7874.59
2014-01-25 09:30:00	7904.68
2014-01-25 10:00:00	7793.34
2014-01-25 10:30:00	7778.5
2014-01-25 11:00:00	7700.2
2014-01-25 11:30:00	7648.14
2014-01-25 12:00:00	7570.97
2014-01-25 12:30:00	7476.21
2014-01-25 13:00:00	7381.2
2014-01-25 13:30:00	7367.26
2014-01-25 14:00:00	7319.13
2014-01-25 14:30:00	7346.16
2014-01-25 15:00:00	7353.51
2014-01-25 15:30:00	7402.38
2014-01-25 16:00:00	7441.76
2014-01-25 16:30:00	7333.87
2014-01-25 17:00:00	7357.56
2014-01-25 17:30:00	7326.54
2014-01-25 18:00:00	7352.41
2014-01-25 18:30:00	7279.32
2014-01-25 19:00:00	7286.26
2014-01-25 19:30:00	7299.48
2014-01-25 20:00:00	7325.49
2014-01-25 20:30:00	7242.51
2014-01-25 21:00:00	7107.87
2014-01-25 21:30:00	7134.56
2014-01-25 22:00:00	7059.17
2014-01-25 22:30:00	7031.3
2014-01-25 23:00:00	6857.5
2014-01-25 23:30:00	6682.53
2014-01-26	6576.24
2014-01-26 00:30:00	6409.72
2014-01-26 01:00:00	6220.04
2014-01-26 01:30:00	5901.78
2014-01-26 02:00:00	5785.6
2014-01-26 02:30:00	5662.03
2014-01-26 03:00:00	5663.02
2014-01-26 03:30:00	5632.41
2014-01-26 04:00:00	5610.58
2014-01-26 04:30:00	5677.11
2014-01-26 05:00:00	5686.38
2014-01-26 05:30:00	5802.33
2014-01-26 06:00:00	5864.74
2014-01-26 06:30:00	6083.47
2014-01-26 07:00:00	6289.16
2014-01-26 07:30:00	6598.25
2014-01-26 08:00:00	6902.48
2014-01-26 08:30:00	7081.97
2014-01-26 09:00:00	7169.48
2014-01-26 09:30:00	7346.23
2014-01-26 10:00:00	7263.99
2014-01-26 10:30:00	7221.54
2014-01-26 11:00:00	7196.89
2014-01-26 11:30:00	7146.54
2014-01-26 12:00:00	7036.82
2014-01-26 12:30:00	7043.59
2014-01-26 13:00:00	6971.54
2014-01-26 13:30:00	6947.18
2014-01-26 14:00:00	6910.24
2014-01-26 14:30:00	6884.44
2014-01-26 15:00:00	6878.87
2014-01-26 15:30:00	6915.52
2014-01-26 16:00:00	6984.27
2014-01-26 16:30:00	6975.15
2014-01-26 17:00:00	7096.47
2014-01-26 17:30:00	7113.83
2014-01-26 18:00:00	7145.73
2014-01-26 18:30:00	7112.94
2014-01-26 19:00:00	7068.6
2014-01-26 19:30:00	7153.22
2014-01-26 20:00:00	7186.29
2014-01-26 20:30:00	7108.64
2014-01-26 21:00:00	7059.01
2014-01-26 21:30:00	7049.67
2014-01-26 22:00:00	7054.35
2014-01-26 22:30:00	6985.26
2014-01-26 23:00:00	6835.98
2014-01-26 23:30:00	6659.67
2014-01-27	6491.49
2014-01-27 00:30:00	6359.58
2014-01-27 01:00:00	6255.16
2014-01-27 01:30:00	5961.07
2014-01-27 02:00:00	5798.58
2014-01-27 02:30:00	5667.05
2014-01-27 03:00:00	5617.77
2014-01-27 03:30:00	5628.38
2014-01-27 04:00:00	5616.96
2014-01-27 04:30:00	5678.31
2014-01-27 05:00:00	5768.65
2014-01-27 05:30:00	5843.49
2014-01-27 06:00:00	5922.65
2014-01-27 06:30:00	6068.94
2014-01-27 07:00:00	6298.91
2014-01-27 07:30:00	6559.02
2014-01-27 08:00:00	6769.26
2014-01-27 08:30:00	7037.66
2014-01-27 09:00:00	7208.04
2014-01-27 09:30:00	7354.16
2014-01-27 10:00:00	7386.91
2014-01-27 10:30:00	7377.54
2014-01-27 11:00:00	7400.75
2014-01-27 11:30:00	7397.83
2014-01-27 12:00:00	7396.74
2014-01-27 12:30:00	7422.7
2014-01-27 13:00:00	7416.7
2014-01-27 13:30:00	7407.14
2014-01-27 14:00:00	7475.8
2014-01-27 14:30:00	7571.79
2014-01-27 15:00:00	7701.37
2014-01-27 15:30:00	7779.57
2014-01-27 16:00:00	7940.53
2014-01-27 16:30:00	8136.77
2014-01-27 17:00:00	8237.94
2014-01-27 17:30:00	8246.15
2014-01-27 18:00:00	8229.86
2014-01-27 18:30:00	8087.7
2014-01-27 19:00:00	7947.47
2014-01-27 19:30:00	7956.81
2014-01-27 20:00:00	8035.37
2014-01-27 20:30:00	7972.24
2014-01-27 21:00:00	7747.81
2014-01-27 21:30:00	7656.2
2014-01-27 22:00:00	7529.82
2014-01-27 22:30:00	7479.51
2014-01-27 23:00:00	7401.62
2014-01-27 23:30:00	7187.73
2014-01-28	7106.83
2014-01-28 00:30:00	6929.31
2014-01-28 01:00:00	6724.14
2014-01-28 01:30:00	6380.68
2014-01-28 02:00:00	6185.35
2014-01-28 02:30:00	6027.69
2014-01-28 03:00:00	5954.68
2014-01-28 03:30:00	5957.48
2014-01-28 04:00:00	6024.97
2014-01-28 04:30:00	6242.77
2014-01-28 05:00:00	6497.62
2014-01-28 05:30:00	6926.76
2014-01-28 06:00:00	7309.17
2014-01-28 06:30:00	7698.43
2014-01-28 07:00:00	8092.64
2014-01-28 07:30:00	8441.31
2014-01-28 08:00:00	8635.75
2014-01-28 08:30:00	8852.29
2014-01-28 09:00:00	9030.14
2014-01-28 09:30:00	9147.3
2014-01-28 10:00:00	9205.3
2014-01-28 10:30:00	9160.64
2014-01-28 11:00:00	9235.88
2014-01-28 11:30:00	9268.52
2014-01-28 12:00:00	9348.6
2014-01-28 12:30:00	9428.56
2014-01-28 13:00:00	9547.99
2014-01-28 13:30:00	9632.59
2014-01-28 14:00:00	9711.63
2014-01-28 14:30:00	9781.57
2014-01-28 15:00:00	9858.21
2014-01-28 15:30:00	9967.01
2014-01-28 16:00:00	10032.6
2014-01-28 16:30:00	10070.5
2014-01-28 17:00:00	10047.6
2014-01-28 17:30:00	9719.99
2014-01-28 18:00:00	9654.07
2014-01-28 18:30:00	9365.95
2014-01-28 19:00:00	9140.08
2014-01-28 19:30:00	9015.88
2014-01-28 20:00:00	8974.01
2014-01-28 20:30:00	8801.73
2014-01-28 21:00:00	8484.13
2014-01-28 21:30:00	8393.17
2014-01-28 22:00:00	8107.3
2014-01-28 22:30:00	8025.09
2014-01-28 23:00:00	7823.83
2014-01-28 23:30:00	7592.32
2014-01-29	7456.63
2014-01-29 00:30:00	7238.87
2014-01-29 01:00:00	6984.04
2014-01-29 01:30:00	6677.72
2014-01-29 02:00:00	6465.33
2014-01-29 02:30:00	6341.77
2014-01-29 03:00:00	6299.62
2014-01-29 03:30:00	6320.94
2014-01-29 04:00:00	6368.78
2014-01-29 04:30:00	6519.86
2014-01-29 05:00:00	6752.41
2014-01-29 05:30:00	7177.53
2014-01-29 06:00:00	7558.71
2014-01-29 06:30:00	7999.75
2014-01-29 07:00:00	8435.8
2014-01-29 07:30:00	8681.51
2014-01-29 08:00:00	8863.71
2014-01-29 08:30:00	9070.18
2014-01-29 09:00:00	9253
2014-01-29 09:30:00	9389.14
2014-01-29 10:00:00	9519.49
2014-01-29 10:30:00	9630.18
2014-01-29 11:00:00	9735.8
2014-01-29 11:30:00	9929.3
2014-01-29 12:00:00	10117.5
2014-01-29 12:30:00	10339.2
2014-01-29 13:00:00	10535.8
2014-01-29 13:30:00	10679.2
2014-01-29 14:00:00	10784.4
2014-01-29 14:30:00	10916.9
2014-01-29 15:00:00	11109
2014-01-29 15:30:00	11276.1
2014-01-29 16:00:00	11278.1
2014-01-29 16:30:00	11162.1
2014-01-29 17:00:00	11059.7
2014-01-29 17:30:00	10728.2
2014-01-29 18:00:00	10541.8
2014-01-29 18:30:00	10193
2014-01-29 19:00:00	9834.66
2014-01-29 19:30:00	9714.59
2014-01-29 20:00:00	9654.52
2014-01-29 20:30:00	9377.85
2014-01-29 21:00:00	8944.82
2014-01-29 21:30:00	8760.01
2014-01-29 22:00:00	8370.44
2014-01-29 22:30:00	8156.08
2014-01-29 23:00:00	7893.39
2014-01-29 23:30:00	7644.59
2014-01-30	7492.77
2014-01-30 00:30:00	7264.39
2014-01-30 01:00:00	7008.55
2014-01-30 01:30:00	6705.36
2014-01-30 02:00:00	6525.71
2014-01-30 02:30:00	6376.96
2014-01-30 03:00:00	6384.36
2014-01-30 03:30:00	6392.83
2014-01-30 04:00:00	6449.53
2014-01-30 04:30:00	6642.86
2014-01-30 05:00:00	6875.26
2014-01-30 05:30:00	7325.49
2014-01-30 06:00:00	7739.92
2014-01-30 06:30:00	8176.52
2014-01-30 07:00:00	8600.81
2014-01-30 07:30:00	8890.06
2014-01-30 08:00:00	9070.83
2014-01-30 08:30:00	9287.44
2014-01-30 09:00:00	9394.57
2014-01-30 09:30:00	9450.52
2014-01-30 10:00:00	9539.37
2014-01-30 10:30:00	9608.43
2014-01-30 11:00:00	9730.75
2014-01-30 11:30:00	9782.21
2014-01-30 12:00:00	9894.07
2014-01-30 12:30:00	10046
2014-01-30 13:00:00	10170.6
2014-01-30 13:30:00	10322.1
2014-01-30 14:00:00	10434.8
2014-01-30 14:30:00	10516.5
2014-01-30 15:00:00	10670.5
2014-01-30 15:30:00	10846.3
2014-01-30 16:00:00	11004.9
2014-01-30 16:30:00	10982.5
2014-01-30 17:00:00	10998.3
2014-01-30 17:30:00	10771.9
2014-01-30 18:00:00	10584.4
2014-01-30 18:30:00	10216.5
2014-01-30 19:00:00	9867.83
2014-01-30 19:30:00	9700.95
2014-01-30 20:00:00	9635.04
2014-01-30 20:30:00	9365.83
2014-01-30 21:00:00	8988.43
2014-01-30 21:30:00	8862.19
2014-01-30 22:00:00	8530.64
2014-01-30 22:30:00	8323.78
2014-01-30 23:00:00	8110.09
2014-01-30 23:30:00	7869.17
2014-01-31	7690.29
2014-01-31 00:30:00	7420.64
2014-01-31 01:00:00	7185.73
2014-01-31 01:30:00	6834.16
2014-01-31 02:00:00	6591.35
2014-01-31 02:30:00	6427.85
2014-01-31 03:00:00	6401.43
2014-01-31 03:30:00	6413.36
2014-01-31 04:00:00	6483.04
2014-01-31 04:30:00	6648.46
2014-01-31 05:00:00	6876.04
2014-01-31 05:30:00	7355.92
2014-01-31 06:00:00	7783.32
2014-01-31 06:30:00	8129.99
2014-01-31 07:00:00	8547.76
2014-01-31 07:30:00	8735.65
2014-01-31 08:00:00	8934.94
2014-01-31 08:30:00	9212.1
2014-01-31 09:00:00	9361.56
2014-01-31 09:30:00	9474.68
2014-01-31 10:00:00	9612.85
2014-01-31 10:30:00	9716.8
2014-01-31 11:00:00	9849.15
2014-01-31 11:30:00	10059.9
2014-01-31 12:00:00	10155.6
2014-01-31 12:30:00	10273.6
2014-01-31 13:00:00	10482.3
2014-01-31 13:30:00	10615.5
2014-01-31 14:00:00	10834.6
2014-01-31 14:30:00	10920.5
2014-01-31 15:00:00	11068
2014-01-31 15:30:00	11195.4
2014-01-31 16:00:00	11335.5
2014-01-31 16:30:00	11325.8
2014-01-31 17:00:00	11186.5
2014-01-31 17:30:00	10827
2014-01-31 18:00:00	10653.7
2014-01-31 18:30:00	10267.4
2014-01-31 19:00:00	9965.78
2014-01-31 19:30:00	9868.69
2014-01-31 20:00:00	9747.8
2014-01-31 20:30:00	9529.6
2014-01-31 21:00:00	9164.05
2014-01-31 21:30:00	9090.29
2014-01-31 22:00:00	8677.41
2014-01-31 22:30:00	8528.96
2014-01-31 23:00:00	8234.53
2014-01-31 23:30:00	7881.6
2014-02-01	7683.7

## Sheet: NSW-Apr
SETTLEMENTDATE	TOTALDEMAND
2014-04-01 00:30:00	7042.85
2014-04-01 01:00:00	6834.99
2014-04-01 01:30:00	6470.1
2014-04-01 02:00:00	6263.63
2014-04-01 02:30:00	6036.27
2014-04-01 03:00:00	5982.12
2014-04-01 03:30:00	6003.83
2014-04-01 04:00:00	6066.65
2014-04-01 04:30:00	6320.96
2014-04-01 05:00:00	6591.54
2014-04-01 05:30:00	7168.48
2014-04-01 06:00:00	7685.45
2014-04-01 06:30:00	8110.81
2014-04-01 07:00:00	8384.13
2014-04-01 07:30:00	8409.57
2014-04-01 08:00:00	8429.02
2014-04-01 08:30:00	8536.53
2014-04-01 09:00:00	8660.41
2014-04-01 09:30:00	8830.46
2014-04-01 10:00:00	8893.08
2014-04-01 10:30:00	8919.8
2014-04-01 11:00:00	8929.09
2014-04-01 11:30:00	8946.13
2014-04-01 12:00:00	8944.88
2014-04-01 12:30:00	8996
2014-04-01 13:00:00	9071.14
2014-04-01 13:30:00	9081.37
2014-04-01 14:00:00	9139.24
2014-04-01 14:30:00	8989.28
2014-04-01 15:00:00	9069.28
2014-04-01 15:30:00	9104.96
2014-04-01 16:00:00	9135.2
2014-04-01 16:30:00	9119.35
2014-04-01 17:00:00	9108.34
2014-04-01 17:30:00	8933.12
2014-04-01 18:00:00	8940.25
2014-04-01 18:30:00	8983.4
2014-04-01 19:00:00	8863.99
2014-04-01 19:30:00	8612.95
2014-04-01 20:00:00	8375.56
2014-04-01 20:30:00	8104.86
2014-04-01 21:00:00	7814.32
2014-04-01 21:30:00	7813.24
2014-04-01 22:00:00	7616.24
2014-04-01 22:30:00	7569.85
2014-04-01 23:00:00	7468.46
2014-04-01 23:30:00	7270.46
2014-04-02	7170.34
2014-04-02 00:30:00	7069.13
2014-04-02 01:00:00	6845.85
2014-04-02 01:30:00	6526.3
2014-04-02 02:00:00	6223.34
2014-04-02 02:30:00	6064.97
2014-04-02 03:00:00	5973.86
2014-04-02 03:30:00	5975.94
2014-04-02 04:00:00	6087.54
2014-04-02 04:30:00	6331.08
2014-04-02 05:00:00	6572.86
2014-04-02 05:30:00	7164.52
2014-04-02 06:00:00	7756.39
2014-04-02 06:30:00	8091.23
2014-04-02 07:00:00	8428.85
2014-04-02 07:30:00	8500.21
2014-04-02 08:00:00	8502.87
2014-04-02 08:30:00	8615.25
2014-04-02 09:00:00	8694.72
2014-04-02 09:30:00	8783.53
2014-04-02 10:00:00	8799.5
2014-04-02 10:30:00	8831.99
2014-04-02 11:00:00	8945.33
2014-04-02 11:30:00	8974.36
2014-04-02 12:00:00	8998.76
2014-04-02 12:30:00	9033.44
2014-04-02 13:00:00	9088.27
2014-04-02 13:30:00	9122.64
2014-04-02 14:00:00	9197.61
2014-04-02 14:30:00	9184.29
2014-04-02 15:00:00	9231.76
2014-04-02 15:30:00	9266.37
2014-04-02 16:00:00	9331.91
2014-04-02 16:30:00	9285.84
2014-04-02 17:00:00	9212.72
2014-04-02 17:30:00	8972.82
2014-04-02 18:00:00	8975.52
2014-04-02 18:30:00	9054.42
2014-04-02 19:00:00	8953.82
2014-04-02 19:30:00	8684.53
2014-04-02 20:00:00	8495.22
2014-04-02 20:30:00	8282.66
2014-04-02 21:00:00	8026.77
2014-04-02 21:30:00	7937.24
2014-04-02 22:00:00	7717.56
2014-04-02 22:30:00	7640.8
2014-04-02 23:00:00	7537.5
2014-04-02 23:30:00	7332.03
2014-04-03	7237.5
2014-04-03 00:30:00	7038.95
2014-04-03 01:00:00	6815.29
2014-04-03 01:30:00	6496.73
2014-04-03 02:00:00	6236.59
2014-04-03 02:30:00	6086.02
2014-04-03 03:00:00	6004.44
2014-04-03 03:30:00	6021.29
2014-04-03 04:00:00	6105.4
2014-04-03 04:30:00	6343.74
2014-04-03 05:00:00	6599.67
2014-04-03 05:30:00	7228
2014-04-03 06:00:00	7772.37
2014-04-03 06:30:00	8175.69
2014-04-03 07:00:00	8547.94
2014-04-03 07:30:00	8633.38
2014-04-03 08:00:00	8665.66
2014-04-03 08:30:00	8794.38
2014-04-03 09:00:00	8900.31
2014-04-03 09:30:00	8986.17
2014-04-03 10:00:00	9039.02
2014-04-03 10:30:00	9085.97
2014-04-03 11:00:00	9181.84
2014-04-03 11:30:00	9211.95
2014-04-03 12:00:00	9271.29
2014-04-03 12:30:00	9373.41
2014-04-03 13:00:00	9395.45
2014-04-03 13:30:00	9444.68
2014-04-03 14:00:00	9440.94
2014-04-03 14:30:00	9409.78
2014-04-03 15:00:00	9459.51
2014-04-03 15:30:00	9488.38
2014-04-03 16:00:00	9563.73
2014-04-03 16:30:00	9501
2014-04-03 17:00:00	9479.15
2014-04-03 17:30:00	9292.33
2014-04-03 18:00:00	9354.7
2014-04-03 18:30:00	9352.08
2014-04-03 19:00:00	9164.38
2014-04-03 19:30:00	8936.69
2014-04-03 20:00:00	8630.34
2014-04-03 20:30:00	8305.92
2014-04-03 21:00:00	7991.62
2014-04-03 21:30:00	7899.07
2014-04-03 22:00:00	7645.37
2014-04-03 22:30:00	7632.95
2014-04-03 23:00:00	7477.12
2014-04-03 23:30:00	7272.08
2014-04-04	7133.31
2014-04-04 00:30:00	6963.78
2014-04-04 01:00:00	6705.52
2014-04-04 01:30:00	6412.01
2014-04-04 02:00:00	6199
2014-04-04 02:30:00	6047.77
2014-04-04 03:00:00	6003.89
2014-04-04 03:30:00	5988.18
2014-04-04 04:00:00	6067.5
2014-04-04 04:30:00	6318.31
2014-04-04 05:00:00	6589.81
2014-04-04 05:30:00	7158.04
2014-04-04 06:00:00	7720.38
2014-04-04 06:30:00	8180.69
2014-04-04 07:00:00	8570.18
2014-04-04 07:30:00	8736.45
2014-04-04 08:00:00	8789.54
2014-04-04 08:30:00	8926.65
2014-04-04 09:00:00	9022.13
2014-04-04 09:30:00	9019.16
2014-04-04 10:00:00	9026.3
2014-04-04 10:30:00	8981.79
2014-04-04 11:00:00	8943.59
2014-04-04 11:30:00	8863.16
2014-04-04 12:00:00	8808.4
2014-04-04 12:30:00	8806.52
2014-04-04 13:00:00	8793.11
2014-04-04 13:30:00	8739.2
2014-04-04 14:00:00	8702.86
2014-04-04 14:30:00	8588.91
2014-04-04 15:00:00	8664.25
2014-04-04 15:30:00	8714.72
2014-04-04 16:00:00	8692.61
2014-04-04 16:30:00	8678.68
2014-04-04 17:00:00	8632.63
2014-04-04 17:30:00	8465.16
2014-04-04 18:00:00	8480.05
2014-04-04 18:30:00	8426.76
2014-04-04 19:00:00	8293.11
2014-04-04 19:30:00	8034.46
2014-04-04 20:00:00	7844.88
2014-04-04 20:30:00	7642.82
2014-04-04 21:00:00	7483.02
2014-04-04 21:30:00	7500.09
2014-04-04 22:00:00	7379.5
2014-04-04 22:30:00	7431.76
2014-04-04 23:00:00	7348.58
2014-04-04 23:30:00	7175.69
2014-04-05	7098.86
2014-04-05 00:30:00	6914.04
2014-04-05 01:00:00	6691.95
2014-04-05 01:30:00	6361.55
2014-04-05 02:00:00	6099.33
2014-04-05 02:30:00	5900.52
2014-04-05 03:00:00	5886.39
2014-04-05 03:30:00	5838.13
2014-04-05 04:00:00	5834.36
2014-04-05 04:30:00	5874.25
2014-04-05 05:00:00	5968.73
2014-04-05 05:30:00	6193.27
2014-04-05 06:00:00	6410.54
2014-04-05 06:30:00	6706.53
2014-04-05 07:00:00	7037.97
2014-04-05 07:30:00	7377.1
2014-04-05 08:00:00	7612.68
2014-04-05 08:30:00	7921.9
2014-04-05 09:00:00	7955.43
2014-04-05 09:30:00	7996.13
2014-04-05 10:00:00	7975.03
2014-04-05 10:30:00	7905.96
2014-04-05 11:00:00	7830.54
2014-04-05 11:30:00	7742.35
2014-04-05 12:00:00	7652.71
2014-04-05 12:30:00	7552.47
2014-04-05 13:00:00	7530.78
2014-04-05 13:30:00	7467.56
2014-04-05 14:00:00	7460.67
2014-04-05 14:30:00	7506.79
2014-04-05 15:00:00	7587.84
2014-04-05 15:30:00	7582.21
2014-04-05 16:00:00	7613.21
2014-04-05 16:30:00	7566.1
2014-04-05 17:00:00	7670.05
2014-04-05 17:30:00	7690.24
2014-04-05 18:00:00	7784.29
2014-04-05 18:30:00	7890.06
2014-04-05 19:00:00	7715.45
2014-04-05 19:30:00	7530.23
2014-04-05 20:00:00	7385.68
2014-04-05 20:30:00	7247
2014-04-05 21:00:00	7115.49
2014-04-05 21:30:00	7107.58
2014-04-05 22:00:00	7048.5
2014-04-05 22:30:00	7127.48
2014-04-05 23:00:00	6923.53
2014-04-05 23:30:00	6735.56
2014-04-06	6614.33
2014-04-06 00:30:00	6482.08
2014-04-06 01:00:00	6341.53
2014-04-06 01:30:00	6022.18
2014-04-06 02:00:00	5804.66
2014-04-06 02:30:00	5646.41
2014-04-06 03:00:00	5583.04
2014-04-06 03:30:00	5618.4
2014-04-06 04:00:00	5596.57
2014-04-06 04:30:00	5590.64
2014-04-06 05:00:00	5629.19
2014-04-06 05:30:00	5738.4
2014-04-06 06:00:00	5812.86
2014-04-06 06:30:00	6021.25
2014-04-06 07:00:00	6237.96
2014-04-06 07:30:00	6503.6
2014-04-06 08:00:00	6806.19
2014-04-06 08:30:00	7053.03
2014-04-06 09:00:00	7283.14
2014-04-06 09:30:00	7391.65
2014-04-06 10:00:00	7466.95
2014-04-06 10:30:00	7532.85
2014-04-06 11:00:00	7485.6
2014-04-06 11:30:00	7479.28
2014-04-06 12:00:00	7527.46
2014-04-06 12:30:00	7525.41
2014-04-06 13:00:00	7484.99
2014-04-06 13:30:00	7371.05
2014-04-06 14:00:00	7355.61
2014-04-06 14:30:00	7342.24
2014-04-06 15:00:00	7253.94
2014-04-06 15:30:00	7338.52
2014-04-06 16:00:00	7394.62
2014-04-06 16:30:00	7464.84
2014-04-06 17:00:00	7646.87
2014-04-06 17:30:00	7712.53
2014-04-06 18:00:00	7930.48
2014-04-06 18:30:00	8203.03
2014-04-06 19:00:00	8145.95
2014-04-06 19:30:00	7828.65
2014-04-06 20:00:00	7590.54
2014-04-06 20:30:00	7409.28
2014-04-06 21:00:00	7335.12
2014-04-06 21:30:00	7224.14
2014-04-06 22:00:00	6970.9
2014-04-06 22:30:00	6981.7
2014-04-06 23:00:00	6890.94
2014-04-06 23:30:00	6824.2
2014-04-07	6711.26
2014-04-07 00:30:00	6547.22
2014-04-07 01:00:00	6421.03
2014-04-07 01:30:00	6179.96
2014-04-07 02:00:00	6045.95
2014-04-07 02:30:00	5860.55
2014-04-07 03:00:00	5765.03
2014-04-07 03:30:00	5710.48
2014-04-07 04:00:00	5693.88
2014-04-07 04:30:00	5776.25
2014-04-07 05:00:00	5906.95
2014-04-07 05:30:00	6190.66
2014-04-07 06:00:00	6492.98
2014-04-07 06:30:00	6994
2014-04-07 07:00:00	7596.05
2014-04-07 07:30:00	7870.33
2014-04-07 08:00:00	8098.2
2014-04-07 08:30:00	8238.14
2014-04-07 09:00:00	8277.49
2014-04-07 09:30:00	8337.48
2014-04-07 10:00:00	8447.49
2014-04-07 10:30:00	8437.53
2014-04-07 11:00:00	8437.03
2014-04-07 11:30:00	8370.98
2014-04-07 12:00:00	8450.98
2014-04-07 12:30:00	8476.99
2014-04-07 13:00:00	8399.89
2014-04-07 13:30:00	8413.39
2014-04-07 14:00:00	8400.2
2014-04-07 14:30:00	8386.86
2014-04-07 15:00:00	8402.9
2014-04-07 15:30:00	8389.65
2014-04-07 16:00:00	8389.18
2014-04-07 16:30:00	8409.32
2014-04-07 17:00:00	8569.91
2014-04-07 17:30:00	8609.7
2014-04-07 18:00:00	8954.85
2014-04-07 18:30:00	9074.65
2014-04-07 19:00:00	8946.78
2014-04-07 19:30:00	8638.38
2014-04-07 20:00:00	8343.89
2014-04-07 20:30:00	8158.47
2014-04-07 21:00:00	7954.93
2014-04-07 21:30:00	7805.02
2014-04-07 22:00:00	7583.29
2014-04-07 22:30:00	7666.85
2014-04-07 23:00:00	7552.17
2014-04-07 23:30:00	7437.58
2014-04-08	7381.89
2014-04-08 00:30:00	7197.92
2014-04-08 01:00:00	6995.08
2014-04-08 01:30:00	6729.14
2014-04-08 02:00:00	6529.17
2014-04-08 02:30:00	6258.51
2014-04-08 03:00:00	6048.64
2014-04-08 03:30:00	5955.59
2014-04-08 04:00:00	5889.42
2014-04-08 04:30:00	5927.1
2014-04-08 05:00:00	6010.05
2014-04-08 05:30:00	6326.76
2014-04-08 06:00:00	6650.69
2014-04-08 06:30:00	7227.08
2014-04-08 07:00:00	7681.6
2014-04-08 07:30:00	8025.93
2014-04-08 08:00:00	8221.67
2014-04-08 08:30:00	8398.14
2014-04-08 09:00:00	8408.97
2014-04-08 09:30:00	8472.64
2014-04-08 10:00:00	8474.11
2014-04-08 10:30:00	8491.43
2014-04-08 11:00:00	8525.59
2014-04-08 11:30:00	8526.39
2014-04-08 12:00:00	8505.18
2014-04-08 12:30:00	8512.72
2014-04-08 13:00:00	8463.89
2014-04-08 13:30:00	8475.97
2014-04-08 14:00:00	8444.95
2014-04-08 14:30:00	8494.91
2014-04-08 15:00:00	8526.38
2014-04-08 15:30:00	8462.88
2014-04-08 16:00:00	8491.28
2014-04-08 16:30:00	8526.62
2014-04-08 17:00:00	8603.51
2014-04-08 17:30:00	8655.91
2014-04-08 18:00:00	8933.39
2014-04-08 18:30:00	9100.55
2014-04-08 19:00:00	8959.29
2014-04-08 19:30:00	8624.46
2014-04-08 20:00:00	8438.52
2014-04-08 20:30:00	8191.16
2014-04-08 21:00:00	8057.89
2014-04-08 21:30:00	7815.66
2014-04-08 22:00:00	7594.6
2014-04-08 22:30:00	7648.94
2014-04-08 23:00:00	7495.54
2014-04-08 23:30:00	7413.93
2014-04-09	7398.42
2014-04-09 00:30:00	7220.36
2014-04-09 01:00:00	7032.02
2014-04-09 01:30:00	6824.11
2014-04-09 02:00:00	6615.93
2014-04-09 02:30:00	6330.33
2014-04-09 03:00:00	6114.23
2014-04-09 03:30:00	6026.49
2014-04-09 04:00:00	5973.66
2014-04-09 04:30:00	5998.55
2014-04-09 05:00:00	6108.03
2014-04-09 05:30:00	6412.23
2014-04-09 06:00:00	6724.31
2014-04-09 06:30:00	7322.99
2014-04-09 07:00:00	7796.88
2014-04-09 07:30:00	8032.44
2014-04-09 08:00:00	8327.47
2014-04-09 08:30:00	8414.99
2014-04-09 09:00:00	8351.24
2014-04-09 09:30:00	8580
2014-04-09 10:00:00	8625.16
2014-04-09 10:30:00	8726.08
2014-04-09 11:00:00	8770.84
2014-04-09 11:30:00	8783.72
2014-04-09 12:00:00	8777.19
2014-04-09 12:30:00	8754.26
2014-04-09 13:00:00	8763.16
2014-04-09 13:30:00	8777.63
2014-04-09 14:00:00	8742.87
2014-04-09 14:30:00	8756
2014-04-09 15:00:00	8702.04
2014-04-09 15:30:00	8616.55
2014-04-09 16:00:00	8675.42
2014-04-09 16:30:00	8669.38
2014-04-09 17:00:00	8730.78
2014-04-09 17:30:00	8808.27
2014-04-09 18:00:00	9087.88
2014-04-09 18:30:00	9265.07
2014-04-09 19:00:00	9116.51
2014-04-09 19:30:00	8822.08
2014-04-09 20:00:00	8536.27
2014-04-09 20:30:00	8326.1
2014-04-09 21:00:00	8093.85
2014-04-09 21:30:00	7917.29
2014-04-09 22:00:00	7799.18
2014-04-09 22:30:00	7801.17
2014-04-09 23:00:00	7643.45
2014-04-09 23:30:00	7566.26
2014-04-10	7536.56
2014-04-10 00:30:00	7337.96
2014-04-10 01:00:00	7169.18
2014-04-10 01:30:00	6903.89
2014-04-10 02:00:00	6701.22
2014-04-10 02:30:00	6362.09
2014-04-10 03:00:00	6203.95
2014-04-10 03:30:00	6052.61
2014-04-10 04:00:00	5976.76
2014-04-10 04:30:00	6044.77
2014-04-10 05:00:00	6174.38
2014-04-10 05:30:00	6416.14
2014-04-10 06:00:00	6730.45
2014-04-10 06:30:00	7333.69
2014-04-10 07:00:00	7880.01
2014-04-10 07:30:00	8108.41
2014-04-10 08:00:00	8475.8
2014-04-10 08:30:00	8593.98
2014-04-10 09:00:00	8622.09
2014-04-10 09:30:00	8797.76
2014-04-10 10:00:00	8893.26
2014-04-10 10:30:00	8925.22
2014-04-10 11:00:00	8921.95
2014-04-10 11:30:00	8932.05
2014-04-10 12:00:00	8920.19
2014-04-10 12:30:00	8893.54
2014-04-10 13:00:00	8884.45
2014-04-10 13:30:00	8883.81
2014-04-10 14:00:00	8854.17
2014-04-10 14:30:00	8813.82
2014-04-10 15:00:00	8709.66
2014-04-10 15:30:00	8681.39
2014-04-10 16:00:00	8713.72
2014-04-10 16:30:00	8762.87
2014-04-10 17:00:00	8792.96
2014-04-10 17:30:00	8928.55
2014-04-10 18:00:00	9277.28
2014-04-10 18:30:00	9391.29
2014-04-10 19:00:00	9223.21
2014-04-10 19:30:00	8864.17
2014-04-10 20:00:00	8642.22
2014-04-10 20:30:00	8465.03
2014-04-10 21:00:00	8297.99
2014-04-10 21:30:00	7995.88
2014-04-10 22:00:00	7801.26
2014-04-10 22:30:00	7863.59
2014-04-10 23:00:00	7684.07
2014-04-10 23:30:00	7609.48
2014-04-11	7559.01
2014-04-11 00:30:00	7411.87
2014-04-11 01:00:00	7256.58
2014-04-11 01:30:00	6977.06
2014-04-11 02:00:00	6745.95
2014-04-11 02:30:00	6340
2014-04-11 03:00:00	6136.92
2014-04-11 03:30:00	5994.53
2014-04-11 04:00:00	5965.21
2014-04-11 04:30:00	6026.18
2014-04-11 05:00:00	6127.4
2014-04-11 05:30:00	6390.82
2014-04-11 06:00:00	6689.3
2014-04-11 06:30:00	7260.9
2014-04-11 07:00:00	7750.13
2014-04-11 07:30:00	8075.37
2014-04-11 08:00:00	8331.97
2014-04-11 08:30:00	8555.07
2014-04-11 09:00:00	8638.84
2014-04-11 09:30:00	8843.75
2014-04-11 10:00:00	8905.02
2014-04-11 10:30:00	8981.55
2014-04-11 11:00:00	9033.43
2014-04-11 11:30:00	8987.08
2014-04-11 12:00:00	9098.57
2014-04-11 12:30:00	9062.23
2014-04-11 13:00:00	9045.48
2014-04-11 13:30:00	8938.24
2014-04-11 14:00:00	8879.93
2014-04-11 14:30:00	8895.59
2014-04-11 15:00:00	8842.43
2014-04-11 15:30:00	8817.73
2014-04-11 16:00:00	8812.86
2014-04-11 16:30:00	8808.11
2014-04-11 17:00:00	8849.69
2014-04-11 17:30:00	8875.44
2014-04-11 18:00:00	9025.28
2014-04-11 18:30:00	9126.25
2014-04-11 19:00:00	8935.63
2014-04-11 19:30:00	8625.5
2014-04-11 20:00:00	8320.85
2014-04-11 20:30:00	8122.58
2014-04-11 21:00:00	7946.96
2014-04-11 21:30:00	7757.8
2014-04-11 22:00:00	7602.04
2014-04-11 22:30:00	7729.95
2014-04-11 23:00:00	7700.09
2014-04-11 23:30:00	7651.91
2014-04-12	7605.33
2014-04-12 00:30:00	7375.61
2014-04-12 01:00:00	7168.62
2014-04-12 01:30:00	6888.49
2014-04-12 02:00:00	6628.86
2014-04-12 02:30:00	6327.46
2014-04-12 03:00:00	6095.64
2014-04-12 03:30:00	5953.65
2014-04-12 04:00:00	5902.24
2014-04-12 04:30:00	5885.58
2014-04-12 05:00:00	5901.43
2014-04-12 05:30:00	5988.84
2014-04-12 06:00:00	6095.71
2014-04-12 06:30:00	6264.36
2014-04-12 07:00:00	6446.71
2014-04-12 07:30:00	6755.54
2014-04-12 08:00:00	7099.37
2014-04-12 08:30:00	7407.93
2014-04-12 09:00:00	7589.84
2014-04-12 09:30:00	7750.44
2014-04-12 10:00:00	7759.87
2014-04-12 10:30:00	7740.08
2014-04-12 11:00:00	7658.85
2014-04-12 11:30:00	7575.5
2014-04-12 12:00:00	7538.73
2014-04-12 12:30:00	7520.02
2014-04-12 13:00:00	7468.82
2014-04-12 13:30:00	7395.16
2014-04-12 14:00:00	7408.78
2014-04-12 14:30:00	7336.29
2014-04-12 15:00:00	7320.45
2014-04-12 15:30:00	7356.22
2014-04-12 16:00:00	7345.01
2014-04-12 16:30:00	7485.92
2014-04-12 17:00:00	7633.05
2014-04-12 17:30:00	7710.23
2014-04-12 18:00:00	8056.81
2014-04-12 18:30:00	8220.59
2014-04-12 19:00:00	8105.56
2014-04-12 19:30:00	7896.99
2014-04-12 20:00:00	7685.85
2014-04-12 20:30:00	7526.41
2014-04-12 21:00:00	7378.57
2014-04-12 21:30:00	7274.34
2014-04-12 22:00:00	7122.08
2014-04-12 22:30:00	7184.3
2014-04-12 23:00:00	7142.22
2014-04-12 23:30:00	7065.76
2014-04-13	6987.55
2014-04-13 00:30:00	6782.15
2014-04-13 01:00:00	6572.82
2014-04-13 01:30:00	6327.74
2014-04-13 02:00:00	6188.04
2014-04-13 02:30:00	5945.95
2014-04-13 03:00:00	5787.55
2014-04-13 03:30:00	5694.42
2014-04-13 04:00:00	5647.41
2014-04-13 04:30:00	5611.3
2014-04-13 05:00:00	5650.76
2014-04-13 05:30:00	5717.3
2014-04-13 06:00:00	5751.23
2014-04-13 06:30:00	5919.02
2014-04-13 07:00:00	6056.19
2014-04-13 07:30:00	6285.63
2014-04-13 08:00:00	6561.56
2014-04-13 08:30:00	6878.07
2014-04-13 09:00:00	7057.45
2014-04-13 09:30:00	7255.29
2014-04-13 10:00:00	7375.65
2014-04-13 10:30:00	7400.58
2014-04-13 11:00:00	7360.67
2014-04-13 11:30:00	7353.46
2014-04-13 12:00:00	7354.71
2014-04-13 12:30:00	7329.68
2014-04-13 13:00:00	7321.82
2014-04-13 13:30:00	7234.26
2014-04-13 14:00:00	7216.45
2014-04-13 14:30:00	7228.98
2014-04-13 15:00:00	7169.96
2014-04-13 15:30:00	7262.68
2014-04-13 16:00:00	7318.3
2014-04-13 16:30:00	7383.41
2014-04-13 17:00:00	7474.69
2014-04-13 17:30:00	7533.39
2014-04-13 18:00:00	7936.11
2014-04-13 18:30:00	8251.32
2014-04-13 19:00:00	8164.03
2014-04-13 19:30:00	7904.82
2014-04-13 20:00:00	7677.38
2014-04-13 20:30:00	7565.47
2014-04-13 21:00:00	7405.6
2014-04-13 21:30:00	7255.75
2014-04-13 22:00:00	7046.08
2014-04-13 22:30:00	7127.86
2014-04-13 23:00:00	7018.01
2014-04-13 23:30:00	6944.4
2014-04-14	6862.49
2014-04-14 00:30:00	6677.97
2014-04-14 01:00:00	6541.98
2014-04-14 01:30:00	6361.72
2014-04-14 02:00:00	6227.71
2014-04-14 02:30:00	5983.05
2014-04-14 03:00:00	5832.37
2014-04-14 03:30:00	5752
2014-04-14 04:00:00	5741.62
2014-04-14 04:30:00	5763.02
2014-04-14 05:00:00	5881.82
2014-04-14 05:30:00	6170.34
2014-04-14 06:00:00	6504.5
2014-04-14 06:30:00	7008.38
2014-04-14 07:00:00	7450.51
2014-04-14 07:30:00	7747.88
2014-04-14 08:00:00	8003.31
2014-04-14 08:30:00	8215.72
2014-04-14 09:00:00	8329.66
2014-04-14 09:30:00	8416
2014-04-14 10:00:00	8407.16
2014-04-14 10:30:00	8404.27
2014-04-14 11:00:00	8433.52
2014-04-14 11:30:00	8394.99
2014-04-14 12:00:00	8348.98
2014-04-14 12:30:00	8367.42
2014-04-14 13:00:00	8375.61
2014-04-14 13:30:00	8348.09
2014-04-14 14:00:00	8336.44
2014-04-14 14:30:00	8337.3
2014-04-14 15:00:00	8345.97
2014-04-14 15:30:00	8324.35
2014-04-14 16:00:00	8357.27
2014-04-14 16:30:00	8396.28
2014-04-14 17:00:00	8517.07
2014-04-14 17:30:00	8691.5
2014-04-14 18:00:00	9051.65
2014-04-14 18:30:00	9199.8
2014-04-14 19:00:00	8982.11
2014-04-14 19:30:00	8646.45
2014-04-14 20:00:00	8444.64
2014-04-14 20:30:00	8210.44
2014-04-14 21:00:00	8006.42
2014-04-14 21:30:00	7828.91
2014-04-14 22:00:00	7604.22
2014-04-14 22:30:00	7696.91
2014-04-14 23:00:00	7593.2
2014-04-14 23:30:00	7571.37
2014-04-15	7516.19
2014-04-15 00:30:00	7394.13
2014-04-15 01:00:00	7196.53
2014-04-15 01:30:00	6971.06
2014-04-15 02:00:00	6758.41
2014-04-15 02:30:00	6453.39
2014-04-15 03:00:00	6236.35
2014-04-15 03:30:00	6042.36
2014-04-15 04:00:00	5962.48
2014-04-15 04:30:00	5968.44
2014-04-15 05:00:00	6078.99
2014-04-15 05:30:00	6319.29
2014-04-15 06:00:00	6569.03
2014-04-15 06:30:00	7131.61
2014-04-15 07:00:00	7534.26
2014-04-15 07:30:00	7817.53
2014-04-15 08:00:00	8081.65
2014-04-15 08:30:00	8247.66
2014-04-15 09:00:00	8308.75
2014-04-15 09:30:00	8394.08
2014-04-15 10:00:00	8459.55
2014-04-15 10:30:00	8475.55
2014-04-15 11:00:00	8449.79
2014-04-15 11:30:00	8372.33
2014-04-15 12:00:00	8380.53
2014-04-15 12:30:00	8371.2
2014-04-15 13:00:00	8381.26
2014-04-15 13:30:00	8379.63
2014-04-15 14:00:00	8358.28
2014-04-15 14:30:00	8358.35
2014-04-15 15:00:00	8371.99
2014-04-15 15:30:00	8356.58
2014-04-15 16:00:00	8413.8
2014-04-15 16:30:00	8458.55
2014-04-15 17:00:00	8494.39
2014-04-15 17:30:00	8666.84
2014-04-15 18:00:00	8985.42
2014-04-15 18:30:00	9071.96
2014-04-15 19:00:00	8913.82
2014-04-15 19:30:00	8609.51
2014-04-15 20:00:00	8405.81
2014-04-15 20:30:00	8231.84
2014-04-15 21:00:00	8048.76
2014-04-15 21:30:00	7830.66
2014-04-15 22:00:00	7613.26
2014-04-15 22:30:00	7726.44
2014-04-15 23:00:00	7606.49
2014-04-15 23:30:00	7549.88
2014-04-16	7534.43
2014-04-16 00:30:00	7362.48
2014-04-16 01:00:00	7166.47
2014-04-16 01:30:00	6953.74
2014-04-16 02:00:00	6725.64
2014-04-16 02:30:00	6437.79
2014-04-16 03:00:00	6191.88
2014-04-16 03:30:00	6046.92
2014-04-16 04:00:00	6022.87
2014-04-16 04:30:00	5996
2014-04-16 05:00:00	6084.19
2014-04-16 05:30:00	6350.52
2014-04-16 06:00:00	6693.32
2014-04-16 06:30:00	7186.35
2014-04-16 07:00:00	7539.67
2014-04-16 07:30:00	7748.82
2014-04-16 08:00:00	7991.57
2014-04-16 08:30:00	8126.57
2014-04-16 09:00:00	8197.24
2014-04-16 09:30:00	8332.95
2014-04-16 10:00:00	8314.63
2014-04-16 10:30:00	8336.51
2014-04-16 11:00:00	8311.74
2014-04-16 11:30:00	8266.63
2014-04-16 12:00:00	8210.37
2014-04-16 12:30:00	8208.45
2014-04-16 13:00:00	8205.57
2014-04-16 13:30:00	8233.41
2014-04-16 14:00:00	8238.49
2014-04-16 14:30:00	8267.96
2014-04-16 15:00:00	8235.76
2014-04-16 15:30:00	8267.66
2014-04-16 16:00:00	8265.2
2014-04-16 16:30:00	8297.26
2014-04-16 17:00:00	8370.61
2014-04-16 17:30:00	8507.32
2014-04-16 18:00:00	8869.29
2014-04-16 18:30:00	9018.59
2014-04-16 19:00:00	8913.98
2014-04-16 19:30:00	8575.9
2014-04-16 20:00:00	8392.2
2014-04-16 20:30:00	8269.61
2014-04-16 21:00:00	8082.56
2014-04-16 21:30:00	7812.94
2014-04-16 22:00:00	7356.05
2014-04-16 22:30:00	7453.52
2014-04-16 23:00:00	7630.28
2014-04-16 23:30:00	7583.51
2014-04-17	7511.9
2014-04-17 00:30:00	7331.24
2014-04-17 01:00:00	7147.97
2014-04-17 01:30:00	6972.55
2014-04-17 02:00:00	6736.96
2014-04-17 02:30:00	6390.11
2014-04-17 03:00:00	6126.77
2014-04-17 03:30:00	5979.53
2014-04-17 04:00:00	5932.3
2014-04-17 04:30:00	5958.48
2014-04-17 05:00:00	6034.48
2014-04-17 05:30:00	6279.57
2014-04-17 06:00:00	6553.07
2014-04-17 06:30:00	7117.65
2014-04-17 07:00:00	7502.65
2014-04-17 07:30:00	7657.33
2014-04-17 08:00:00	7871.09
2014-04-17 08:30:00	8009.53
2014-04-17 09:00:00	8070.2
2014-04-17 09:30:00	8170.12
2014-04-17 10:00:00	8173.36
2014-04-17 10:30:00	8165.43
2014-04-17 11:00:00	8183.32
2014-04-17 11:30:00	8093.05
2014-04-17 12:00:00	8052.36
2014-04-17 12:30:00	8008.28
2014-04-17 13:00:00	8034.6
2014-04-17 13:30:00	7986.86
2014-04-17 14:00:00	7961.22
2014-04-17 14:30:00	7971.48
2014-04-17 15:00:00	7946.79
2014-04-17 15:30:00	7955.95
2014-04-17 16:00:00	8010.57
2014-04-17 16:30:00	8072.9
2014-04-17 17:00:00	8109.44
2014-04-17 17:30:00	8221.77
2014-04-17 18:00:00	8592.5
2014-04-17 18:30:00	8766.31
2014-04-17 19:00:00	8670.52
2014-04-17 19:30:00	8416.06
2014-04-17 20:00:00	8173.87
2014-04-17 20:30:00	8055.41
2014-04-17 21:00:00	7878.88
2014-04-17 21:30:00	7655.25
2014-04-17 22:00:00	7472.53
2014-04-17 22:30:00	7573.26
2014-04-17 23:00:00	7448.14
2014-04-17 23:30:00	7431.89
2014-04-18	7390.82
2014-04-18 00:30:00	7244.23
2014-04-18 01:00:00	7046.82
2014-04-18 01:30:00	6851.36
2014-04-18 02:00:00	6615.08
2014-04-18 02:30:00	6265.01
2014-04-18 03:00:00	6008.54
2014-04-18 03:30:00	5841.61
2014-04-18 04:00:00	5782.84
2014-04-18 04:30:00	5696.64
2014-04-18 05:00:00	5651.11
2014-04-18 05:30:00	5744.57
2014-04-18 06:00:00	5852.93
2014-04-18 06:30:00	5995.96
2014-04-18 07:00:00	6102.58
2014-04-18 07:30:00	6181.53
2014-04-18 08:00:00	6372.29
2014-04-18 08:30:00	6547.78
2014-04-18 09:00:00	6640.4
2014-04-18 09:30:00	6766.14
2014-04-18 10:00:00	6790.79
2014-04-18 10:30:00	6790.11
2014-04-18 11:00:00	6781.97
2014-04-18 11:30:00	6690.42
2014-04-18 12:00:00	6613.61
2014-04-18 12:30:00	6634.05
2014-04-18 13:00:00	6587.14
2014-04-18 13:30:00	6510.47
2014-04-18 14:00:00	6478.86
2014-04-18 14:30:00	6435.74
2014-04-18 15:00:00	6460.15
2014-04-18 15:30:00	6505.33
2014-04-18 16:00:00	6590.27
2014-04-18 16:30:00	6741.78
2014-04-18 17:00:00	6925.81
2014-04-18 17:30:00	7145.77
2014-04-18 18:00:00	7569.88
2014-04-18 18:30:00	7802.17
2014-04-18 19:00:00	7607.75
2014-04-18 19:30:00	7347.46
2014-04-18 20:00:00	7201.59
2014-04-18 20:30:00	7057.49
2014-04-18 21:00:00	6960.63
2014-04-18 21:30:00	6821.48
2014-04-18 22:00:00	6789.12
2014-04-18 22:30:00	6929.03
2014-04-18 23:00:00	6906.13
2014-04-18 23:30:00	6957.21
2014-04-19	7030.98
2014-04-19 00:30:00	6917.69
2014-04-19 01:00:00	6732.01
2014-04-19 01:30:00	6553.34
2014-04-19 02:00:00	6288.74
2014-04-19 02:30:00	6011.83
2014-04-19 03:00:00	5832.21
2014-04-19 03:30:00	5651.15
2014-04-19 04:00:00	5584.64
2014-04-19 04:30:00	5546.02
2014-04-19 05:00:00	5584.11
2014-04-19 05:30:00	5643.44
2014-04-19 06:00:00	5744.28
2014-04-19 06:30:00	5893.46
2014-04-19 07:00:00	6011.13
2014-04-19 07:30:00	6198.46
2014-04-19 08:00:00	6467.12
2014-04-19 08:30:00	6728.55
2014-04-19 09:00:00	6959.52
2014-04-19 09:30:00	7077.32
2014-04-19 10:00:00	7053.75
2014-04-19 10:30:00	7062.65
2014-04-19 11:00:00	6974.21
2014-04-19 11:30:00	6893.9
2014-04-19 12:00:00	6833.76
2014-04-19 12:30:00	6824.82
2014-04-19 13:00:00	6757.5
2014-04-19 13:30:00	6752.39
2014-04-19 14:00:00	6676.07
2014-04-19 14:30:00	6681.53
2014-04-19 15:00:00	6694.48
2014-04-19 15:30:00	6795.33
2014-04-19 16:00:00	6875.06
2014-04-19 16:30:00	7014.82
2014-04-19 17:00:00	7202.6
2014-04-19 17:30:00	7297.29
2014-04-19 18:00:00	7725.55
2014-04-19 18:30:00	7939.75
2014-04-19 19:00:00	7779.71
2014-04-19 19:30:00	7582.03
2014-04-19 20:00:00	7427.53
2014-04-19 20:30:00	7307.7
2014-04-19 21:00:00	7166.4
2014-04-19 21:30:00	7097.46
2014-04-19 22:00:00	6994.63
2014-04-19 22:30:00	7067.28
2014-04-19 23:00:00	6941.58
2014-04-19 23:30:00	6929.35
2014-04-20	6846.07
2014-04-20 00:30:00	6600.3
2014-04-20 01:00:00	6448.89
2014-04-20 01:30:00	6279.25
2014-04-20 02:00:00	6098.74
2014-04-20 02:30:00	5842.8
2014-04-20 03:00:00	5681.25
2014-04-20 03:30:00	5588.45
2014-04-20 04:00:00	5540.52
2014-04-20 04:30:00	5507.79
2014-04-20 05:00:00	5547.37
2014-04-20 05:30:00	5572.68
2014-04-20 06:00:00	5666.36
2014-04-20 06:30:00	5761.33
2014-04-20 07:00:00	5895.61
2014-04-20 07:30:00	6098.75
2014-04-20 08:00:00	6312.5
2014-04-20 08:30:00	6587.75
2014-04-20 09:00:00	6716.63
2014-04-20 09:30:00	6810.98
2014-04-20 10:00:00	6789.09
2014-04-20 10:30:00	6735.79
2014-04-20 11:00:00	6683.43
2014-04-20 11:30:00	6649.74
2014-04-20 12:00:00	6599.52
2014-04-20 12:30:00	6559.17
2014-04-20 13:00:00	6487.26
2014-04-20 13:30:00	6377.25
2014-04-20 14:00:00	6348.4
2014-04-20 14:30:00	6337.6
2014-04-20 15:00:00	6352.75
2014-04-20 15:30:00	6391.21
2014-04-20 16:00:00	6460.66
2014-04-20 16:30:00	6598.12
2014-04-20 17:00:00	6779.21
2014-04-20 17:30:00	6980.45
2014-04-20 18:00:00	7404.96
2014-04-20 18:30:00	7601.37
2014-04-20 19:00:00	7504.6
2014-04-20 19:30:00	7330.4
2014-04-20 20:00:00	7194.84
2014-04-20 20:30:00	7115.88
2014-04-20 21:00:00	7074.72
2014-04-20 21:30:00	6955.83
2014-04-20 22:00:00	6921.66
2014-04-20 22:30:00	6911.47
2014-04-20 23:00:00	6815.07
2014-04-20 23:30:00	6779.69
2014-04-21	6686.83
2014-04-21 00:30:00	6543.7
2014-04-21 01:00:00	6360.81
2014-04-21 01:30:00	6192.35
2014-04-21 02:00:00	6052.18
2014-04-21 02:30:00	5808.84
2014-04-21 03:00:00	5678.57
2014-04-21 03:30:00	5565.1
2014-04-21 04:00:00	5526.93
2014-04-21 04:30:00	5510.84
2014-04-21 05:00:00	5562.59
2014-04-21 05:30:00	5638.33
2014-04-21 06:00:00	5762.88
2014-04-21 06:30:00	5935.74
2014-04-21 07:00:00	6033.51
2014-04-21 07:30:00	6170.89
2014-04-21 08:00:00	6318.26
2014-04-21 08:30:00	6551.01
2014-04-21 09:00:00	6695.07
2014-04-21 09:30:00	6813.7
2014-04-21 10:00:00	6883.75
2014-04-21 10:30:00	6940.77
2014-04-21 11:00:00	6880.66
2014-04-21 11:30:00	6792.78
2014-04-21 12:00:00	6716.92
2014-04-21 12:30:00	6729.47
2014-04-21 13:00:00	6714.72
2014-04-21 13:30:00	6699.28
2014-04-21 14:00:00	6679.88
2014-04-21 14:30:00	6676.85
2014-04-21 15:00:00	6722.16
2014-04-21 15:30:00	6788.41
2014-04-21 16:00:00	6900.23
2014-04-21 16:30:00	7028.29
2014-04-21 17:00:00	7169.47
2014-04-21 17:30:00	7515.48
2014-04-21 18:00:00	8069.85
2014-04-21 18:30:00	8224.06
2014-04-21 19:00:00	8026.37
2014-04-21 19:30:00	7811.51
2014-04-21 20:00:00	7641.5
2014-04-21 20:30:00	7484.3
2014-04-21 21:00:00	7303.69
2014-04-21 21:30:00	7198.83
2014-04-21 22:00:00	7030.19
2014-04-21 22:30:00	7104.3
2014-04-21 23:00:00	7038.76
2014-04-21 23:30:00	7070.56
2014-04-22	7044.37
2014-04-22 00:30:00	6915.67
2014-04-22 01:00:00	6760.74
2014-04-22 01:30:00	6606.03
2014-04-22 02:00:00	6423.66
2014-04-22 02:30:00	6135.85
2014-04-22 03:00:00	5889.46
2014-04-22 03:30:00	5736.95
2014-04-22 04:00:00	5656.41
2014-04-22 04:30:00	5656.45
2014-04-22 05:00:00	5773.62
2014-04-22 05:30:00	5983.75
2014-04-22 06:00:00	6207.6
2014-04-22 06:30:00	6774.35
2014-04-22 07:00:00	7129.31
2014-04-22 07:30:00	7387.15
2014-04-22 08:00:00	7701.3
2014-04-22 08:30:00	7919.24
2014-04-22 09:00:00	8037.92
2014-04-22 09:30:00	8058.95
2014-04-22 10:00:00	8044.79
2014-04-22 10:30:00	8032.08
2014-04-22 11:00:00	7980.49
2014-04-22 11:30:00	7888.35
2014-04-22 12:00:00	7844.2
2014-04-22 12:30:00	7878.3
2014-04-22 13:00:00	7944.66
2014-04-22 13:30:00	7932.2
2014-04-22 14:00:00	7919.29
2014-04-22 14:30:00	7954.47
2014-04-22 15:00:00	7960.8
2014-04-22 15:30:00	7984.91
2014-04-22 16:00:00	7988.53
2014-04-22 16:30:00	8029.82
2014-04-22 17:00:00	8154.66
2014-04-22 17:30:00	8407.78
2014-04-22 18:00:00	8825.99
2014-04-22 18:30:00	8899.68
2014-04-22 19:00:00	8700.52
2014-04-22 19:30:00	8359.12
2014-04-22 20:00:00	8187.21
2014-04-22 20:30:00	8008.33
2014-04-22 21:00:00	7810.89
2014-04-22 21:30:00	7633.17
2014-04-22 22:00:00	7437.59
2014-04-22 22:30:00	7542.98
2014-04-22 23:00:00	7382.6
2014-04-22 23:30:00	7377.91
2014-04-23	7360.91
2014-04-23 00:30:00	7198.79
2014-04-23 01:00:00	7049.2
2014-04-23 01:30:00	6813.31
2014-04-23 02:00:00	6624.96
2014-04-23 02:30:00	6309.91
2014-04-23 03:00:00	6120.14
2014-04-23 03:30:00	5950.62
2014-04-23 04:00:00	5891.45
2014-04-23 04:30:00	5870.68
2014-04-23 05:00:00	5950.84
2014-04-23 05:30:00	6192.37
2014-04-23 06:00:00	6460.84
2014-04-23 06:30:00	6929.48
2014-04-23 07:00:00	7315.81
2014-04-23 07:30:00	7515.57
2014-04-23 08:00:00	7758.5
2014-04-23 08:30:00	7967.78
2014-04-23 09:00:00	8077.84
2014-04-23 09:30:00	8099.23
2014-04-23 10:00:00	8089.56
2014-04-23 10:30:00	8126.02
2014-04-23 11:00:00	8127.42
2014-04-23 11:30:00	8081.77
2014-04-23 12:00:00	8073.87
2014-04-23 12:30:00	8049.82
2014-04-23 13:00:00	8025.49
2014-04-23 13:30:00	8029.21
2014-04-23 14:00:00	8065.3
2014-04-23 14:30:00	8082.18
2014-04-23 15:00:00	8128.54
2014-04-23 15:30:00	8111.98
2014-04-23 16:00:00	8140.31
2014-04-23 16:30:00	8202.89
2014-04-23 17:00:00	8327.22
2014-04-23 17:30:00	8402.23
2014-04-23 18:00:00	8783.92
2014-04-23 18:30:00	8847.83
2014-04-23 19:00:00	8631.2
2014-04-23 19:30:00	8286.12
2014-04-23 20:00:00	8139.18
2014-04-23 20:30:00	7920.28
2014-04-23 21:00:00	7702.89
2014-04-23 21:30:00	7513.11
2014-04-23 22:00:00	7293.93
2014-04-23 22:30:00	7416.38
2014-04-23 23:00:00	7348.25
2014-04-23 23:30:00	7358.99
2014-04-24	7299.74
2014-04-24 00:30:00	7114.33
2014-04-24 01:00:00	6930.9
2014-04-24 01:30:00	6747.02
2014-04-24 02:00:00	6498.13
2014-04-24 02:30:00	6170.93
2014-04-24 03:00:00	5977.09
2014-04-24 03:30:00	5812.16
2014-04-24 04:00:00	5769.2
2014-04-24 04:30:00	5780.57
2014-04-24 05:00:00	5843.3
2014-04-24 05:30:00	6095.89
2014-04-24 06:00:00	6337.43
2014-04-24 06:30:00	6856.78
2014-04-24 07:00:00	7179.51
2014-04-24 07:30:00	7430.48
2014-04-24 08:00:00	7741.72
2014-04-24 08:30:00	7896.6
2014-04-24 09:00:00	7988.44
2014-04-24 09:30:00	8080.36
2014-04-24 10:00:00	8029.05
2014-04-24 10:30:00	8101.23
2014-04-24 11:00:00	8097.96
2014-04-24 11:30:00	8072.47
2014-04-24 12:00:00	8081.39
2014-04-24 12:30:00	8070.61
2014-04-24 13:00:00	8033.74
2014-04-24 13:30:00	8069.1
2014-04-24 14:00:00	8088.95
2014-04-24 14:30:00	8113.15
2014-04-24 15:00:00	8122.63
2014-04-24 15:30:00	8099.46
2014-04-24 16:00:00	8145.4
2014-04-24 16:30:00	8244.72
2014-04-24 17:00:00	8290.52
2014-04-24 17:30:00	8425.96
2014-04-24 18:00:00	8854.47
2014-04-24 18:30:00	8877.55
2014-04-24 19:00:00	8683.62
2014-04-24 19:30:00	8426.99
2014-04-24 20:00:00	8174.48
2014-04-24 20:30:00	8000.95
2014-04-24 21:00:00	7835.49
2014-04-24 21:30:00	7602.8
2014-04-24 22:00:00	7419.6
2014-04-24 22:30:00	7458.2
2014-04-24 23:00:00	7366.23
2014-04-24 23:30:00	7440.8
2014-04-25	7418.84
2014-04-25 00:30:00	7170.67
2014-04-25 01:00:00	6952.79
2014-04-25 01:30:00	6750.7
2014-04-25 02:00:00	6534.04
2014-04-25 02:30:00	6176.95
2014-04-25 03:00:00	5994.48
2014-04-25 03:30:00	5788.28
2014-04-25 04:00:00	5704.5
2014-04-25 04:30:00	5677.38
2014-04-25 05:00:00	5715.66
2014-04-25 05:30:00	5795.34
2014-04-25 06:00:00	5867.07
2014-04-25 06:30:00	5959.79
2014-04-25 07:00:00	6062.19
2014-04-25 07:30:00	6148.57
2014-04-25 08:00:00	6399.8
2014-04-25 08:30:00	6621.3
2014-04-25 09:00:00	6780.2
2014-04-25 09:30:00	6985.63
2014-04-25 10:00:00	7110.87
2014-04-25 10:30:00	7213.18
2014-04-25 11:00:00	7249.29
2014-04-25 11:30:00	7230.03
2014-04-25 12:00:00	7209.2
2014-04-25 12:30:00	7240.83
2014-04-25 13:00:00	7203.64
2014-04-25 13:30:00	7166.25
2014-04-25 14:00:00	7087.12
2014-04-25 14:30:00	7057.2
2014-04-25 15:00:00	6998.76
2014-04-25 15:30:00	7018.98
2014-04-25 16:00:00	7099.97
2014-04-25 16:30:00	7200.1
2014-04-25 17:00:00	7338.62
2014-04-25 17:30:00	7582.43
2014-04-25 18:00:00	8034.31
2014-04-25 18:30:00	8093.5
2014-04-25 19:00:00	7895.98
2014-04-25 19:30:00	7607.48
2014-04-25 20:00:00	7432.13
2014-04-25 20:30:00	7307.53
2014-04-25 21:00:00	7191.27
2014-04-25 21:30:00	7163.26
2014-04-25 22:00:00	7044.5
2014-04-25 22:30:00	7195.37
2014-04-25 23:00:00	7145.42
2014-04-25 23:30:00	7231.09
2014-04-26	7169.4
2014-04-26 00:30:00	7008.01
2014-04-26 01:00:00	6850.4
2014-04-26 01:30:00	6613.67
2014-04-26 02:00:00	6429.12
2014-04-26 02:30:00	6105.78
2014-04-26 03:00:00	5878.62
2014-04-26 03:30:00	5715.81
2014-04-26 04:00:00	5636.8
2014-04-26 04:30:00	5571.71
2014-04-26 05:00:00	5626
2014-04-26 05:30:00	5682.58
2014-04-26 06:00:00	5768.67
2014-04-26 06:30:00	5954.89
2014-04-26 07:00:00	6131.19
2014-04-26 07:30:00	6367.07
2014-04-26 08:00:00	6686.31
2014-04-26 08:30:00	6989.58
2014-04-26 09:00:00	7206.85
2014-04-26 09:30:00	7462.94
2014-04-26 10:00:00	7436.96
2014-04-26 10:30:00	7467.76
2014-04-26 11:00:00	7436.42
2014-04-26 11:30:00	7349.18
2014-04-26 12:00:00	7282.33
2014-04-26 12:30:00	7271.61
2014-04-26 13:00:00	7149.22
2014-04-26 13:30:00	7130.31
2014-04-26 14:00:00	7041.11
2014-04-26 14:30:00	7029.23
2014-04-26 15:00:00	7043.75
2014-04-26 15:30:00	7082.88
2014-04-26 16:00:00	7177.63
2014-04-26 16:30:00	7308.86
2014-04-26 17:00:00	7457.22
2014-04-26 17:30:00	7671.14
2014-04-26 18:00:00	8159.07
2014-04-26 18:30:00	8213.54
2014-04-26 19:00:00	8043.64
2014-04-26 19:30:00	7820.8
2014-04-26 20:00:00	7602.34
2014-04-26 20:30:00	7431.95
2014-04-26 21:00:00	7373.3
2014-04-26 21:30:00	7306.37
2014-04-26 22:00:00	7220.46
2014-04-26 22:30:00	7269.41
2014-04-26 23:00:00	7187.05
2014-04-26 23:30:00	7149.02
2014-04-27	7043.21
2014-04-27 00:30:00	6810.02
2014-04-27 01:00:00	6620.22
2014-04-27 01:30:00	6458.88
2014-04-27 02:00:00	6294.36
2014-04-27 02:30:00	6006.04
2014-04-27 03:00:00	5856.19
2014-04-27 03:30:00	5725.35
2014-04-27 04:00:00	5671.29
2014-04-27 04:30:00	5631.95
2014-04-27 05:00:00	5650.24
2014-04-27 05:30:00	5716.63
2014-04-27 06:00:00	5787
2014-04-27 06:30:00	5905.16
2014-04-27 07:00:00	6006.08
2014-04-27 07:30:00	6205.76
2014-04-27 08:00:00	6477.25
2014-04-27 08:30:00	6781.35
2014-04-27 09:00:00	7020.4
2014-04-27 09:30:00	7289.78
2014-04-27 10:00:00	7411.61
2014-04-27 10:30:00	7474.6
2014-04-27 11:00:00	7473.78
2014-04-27 11:30:00	7412.64
2014-04-27 12:00:00	7367.02
2014-04-27 12:30:00	7403.15
2014-04-27 13:00:00	7409.42
2014-04-27 13:30:00	7381.6
2014-04-27 14:00:00	7332.14
2014-04-27 14:30:00	7353.66
2014-04-27 15:00:00	7394.07
2014-04-27 15:30:00	7458.32
2014-04-27 16:00:00	7484.88
2014-04-27 16:30:00	7619.26
2014-04-27 17:00:00	7828.21
2014-04-27 17:30:00	8069.25
2014-04-27 18:00:00	8485.4
2014-04-27 18:30:00	8556.37
2014-04-27 19:00:00	8341.65
2014-04-27 19:30:00	8035.23
2014-04-27 20:00:00	7873.37
2014-04-27 20:30:00	7714.34
2014-04-27 21:00:00	7604.46
2014-04-27 21:30:00	7454.68
2014-04-27 22:00:00	7203.78
2014-04-27 22:30:00	7219.18
2014-04-27 23:00:00	7064.91
2014-04-27 23:30:00	7045.85
2014-04-28	6926.19
2014-04-28 00:30:00	6687.94
2014-04-28 01:00:00	6477.58
2014-04-28 01:30:00	6363.84
2014-04-28 02:00:00	6196.38
2014-04-28 02:30:00	5985.29
2014-04-28 03:00:00	5831.29
2014-04-28 03:30:00	5703.31
2014-04-28 04:00:00	5722.19
2014-04-28 04:30:00	5740.68
2014-04-28 05:00:00	5848.52
2014-04-28 05:30:00	6091.54
2014-04-28 06:00:00	6378.45
2014-04-28 06:30:00	6976.58
2014-04-28 07:00:00	7467.16
2014-04-28 07:30:00	7763.88
2014-04-28 08:00:00	8073.94
2014-04-28 08:30:00	8281.1
2014-04-28 09:00:00	8350.01
2014-04-28 09:30:00	8449.06
2014-04-28 10:00:00	8448.4
2014-04-28 10:30:00	8516.25
2014-04-28 11:00:00	8521.81
2014-04-28 11:30:00	8514.03
2014-04-28 12:00:00	8494.84
2014-04-28 12:30:00	8414.79
2014-04-28 13:00:00	8399.13
2014-04-28 13:30:00	8394.51
2014-04-28 14:00:00	8383.37
2014-04-28 14:30:00	8339.09
2014-04-28 15:00:00	8315.32
2014-04-28 15:30:00	8282.61
2014-04-28 16:00:00	8347.72
2014-04-28 16:30:00	8377.81
2014-04-28 17:00:00	8544.01
2014-04-28 17:30:00	8805.49
2014-04-28 18:00:00	9331.71
2014-04-28 18:30:00	9295.15
2014-04-28 19:00:00	9136.92
2014-04-28 19:30:00	8798.99
2014-04-28 20:00:00	8563.91
2014-04-28 20:30:00	8338.88
2014-04-28 21:00:00	8181.46
2014-04-28 21:30:00	8051.06
2014-04-28 22:00:00	7879.47
2014-04-28 22:30:00	7925.29
2014-04-28 23:00:00	7760.92
2014-04-28 23:30:00	7770.27
2014-04-29	7688.61
2014-04-29 00:30:00	7502.51
2014-04-29 01:00:00	7306.84
2014-04-29 01:30:00	7060.18
2014-04-29 02:00:00	6799.71
2014-04-29 02:30:00	6508.51
2014-04-29 03:00:00	6215.69
2014-04-29 03:30:00	6069.56
2014-04-29 04:00:00	6000.85
2014-04-29 04:30:00	5999.96
2014-04-29 05:00:00	6095.5
2014-04-29 05:30:00	6315.92
2014-04-29 06:00:00	6659.06
2014-04-29 06:30:00	7260.61
2014-04-29 07:00:00	7782.69
2014-04-29 07:30:00	8042.94
2014-04-29 08:00:00	8249.91
2014-04-29 08:30:00	8346.47
2014-04-29 09:00:00	8276.54
2014-04-29 09:30:00	8288.51
2014-04-29 10:00:00	8329.36
2014-04-29 10:30:00	8301.87
2014-04-29 11:00:00	8207.38
2014-04-29 11:30:00	8243.73
2014-04-29 12:00:00	8279.02
2014-04-29 12:30:00	8283.41
2014-04-29 13:00:00	8265.89
2014-04-29 13:30:00	8286.22
2014-04-29 14:00:00	8313.22
2014-04-29 14:30:00	8345.6
2014-04-29 15:00:00	8358.98
2014-04-29 15:30:00	8362.59
2014-04-29 16:00:00	8484.5
2014-04-29 16:30:00	8579.65
2014-04-29 17:00:00	8712.23
2014-04-29 17:30:00	8966.23
2014-04-29 18:00:00	9347.03
2014-04-29 18:30:00	9214.69
2014-04-29 19:00:00	8994.87
2014-04-29 19:30:00	8679.12
2014-04-29 20:00:00	8482.8
2014-04-29 20:30:00	8286.81
2014-04-29 21:00:00	8087.65
2014-04-29 21:30:00	7859.87
2014-04-29 22:00:00	7664.14
2014-04-29 22:30:00	7783.98
2014-04-29 23:00:00	7586.22
2014-04-29 23:30:00	7579.22
2014-04-30	7531.13
2014-04-30 00:30:00	7275.99
2014-04-30 01:00:00	7076.51
2014-04-30 01:30:00	6860.86
2014-04-30 02:00:00	6625.19
2014-04-30 02:30:00	6328.53
2014-04-30 03:00:00	6091.92
2014-04-30 03:30:00	5922.29
2014-04-30 04:00:00	5849.26
2014-04-30 04:30:00	5877.52
2014-04-30 05:00:00	5928.89
2014-04-30 05:30:00	6190.55
2014-04-30 06:00:00	6508.94
2014-04-30 06:30:00	7138.83
2014-04-30 07:00:00	7689.82
2014-04-30 07:30:00	7952.24
2014-04-30 08:00:00	8354.25
2014-04-30 08:30:00	8389.22
2014-04-30 09:00:00	8379.68
2014-04-30 09:30:00	8445.14
2014-04-30 10:00:00	8549.49
2014-04-30 10:30:00	8538.27
2014-04-30 11:00:00	8501.69
2014-04-30 11:30:00	8405.5
2014-04-30 12:00:00	8356.55
2014-04-30 12:30:00	8379.7
2014-04-30 13:00:00	8363.8
2014-04-30 13:30:00	8327
2014-04-30 14:00:00	8314.2
2014-04-30 14:30:00	8322.53
2014-04-30 15:00:00	8307.09
2014-04-30 15:30:00	8274.9
2014-04-30 16:00:00	8307.35
2014-04-30 16:30:00	8422.2
2014-04-30 17:00:00	8511.88
2014-04-30 17:30:00	8731.35
2014-04-30 18:00:00	9235.57
2014-04-30 18:30:00	9249.56
2014-04-30 19:00:00	9083.97
2014-04-30 19:30:00	8819.33
2014-04-30 20:00:00	8578.43
2014-04-30 20:30:00	8405.05
2014-04-30 21:00:00	8221.39
2014-04-30 21:30:00	8102.36
2014-04-30 22:00:00	7931.52
2014-04-30 22:30:00	8010.17
2014-04-30 23:00:00	7852.8
2014-04-30 23:30:00	7844.95
2014-05-01	7766.17

## Sheet: NSW-Jul
SETTLEMENTDATE	TOTALDEMAND
2014-07-01 00:30:00	8397.17
2014-07-01 01:00:00	8160.28
2014-07-01 01:30:00	7988.26
2014-07-01 02:00:00	7795.13
2014-07-01 02:30:00	7432.19
2014-07-01 03:00:00	7139.07
2014-07-01 03:30:00	6958.1
2014-07-01 04:00:00	6813.64
2014-07-01 04:30:00	6852.93
2014-07-01 05:00:00	6935.14
2014-07-01 05:30:00	7284.95
2014-07-01 06:00:00	7657.26
2014-07-01 06:30:00	8423.59
2014-07-01 07:00:00	9041.87
2014-07-01 07:30:00	9522.37
2014-07-01 08:00:00	9905.16
2014-07-01 08:30:00	10115.4
2014-07-01 09:00:00	10050.7
2014-07-01 09:30:00	9986.59
2014-07-01 10:00:00	9818.04
2014-07-01 10:30:00	9613.68
2014-07-01 11:00:00	9501.51
2014-07-01 11:30:00	9276.02
2014-07-01 12:00:00	9101.39
2014-07-01 12:30:00	8967.98
2014-07-01 13:00:00	8875.74
2014-07-01 13:30:00	8792.35
2014-07-01 14:00:00	8771.07
2014-07-01 14:30:00	8773.5
2014-07-01 15:00:00	8742.72
2014-07-01 15:30:00	8815.88
2014-07-01 16:00:00	8935.32
2014-07-01 16:30:00	9164.07
2014-07-01 17:00:00	9693.48
2014-07-01 17:30:00	10474.9
2014-07-01 18:00:00	11016
2014-07-01 18:30:00	11050.8
2014-07-01 19:00:00	10966.9
2014-07-01 19:30:00	10693.9
2014-07-01 20:00:00	10532.7
2014-07-01 20:30:00	10313.1
2014-07-01 21:00:00	10091.2
2014-07-01 21:30:00	9768.5
2014-07-01 22:00:00	9502.01
2014-07-01 22:30:00	9403.68
2014-07-01 23:00:00	9031.99
2014-07-01 23:30:00	8877.89
2014-07-02	8709.44
2014-07-02 00:30:00	8536.96
2014-07-02 01:00:00	8362.65
2014-07-02 01:30:00	8119.56
2014-07-02 02:00:00	7891.01
2014-07-02 02:30:00	7494.33
2014-07-02 03:00:00	7179.93
2014-07-02 03:30:00	6942.03
2014-07-02 04:00:00	6862.19
2014-07-02 04:30:00	6898.13
2014-07-02 05:00:00	7015.27
2014-07-02 05:30:00	7343.29
2014-07-02 06:00:00	7762.5
2014-07-02 06:30:00	8512
2014-07-02 07:00:00	9083.28
2014-07-02 07:30:00	9518.22
2014-07-02 08:00:00	9986.92
2014-07-02 08:30:00	10166
2014-07-02 09:00:00	10117.9
2014-07-02 09:30:00	10016.5
2014-07-02 10:00:00	9804.73
2014-07-02 10:30:00	9587.69
2014-07-02 11:00:00	9438.55
2014-07-02 11:30:00	9215.13
2014-07-02 12:00:00	9036.74
2014-07-02 12:30:00	8908.38
2014-07-02 13:00:00	8779.17
2014-07-02 13:30:00	8611.97
2014-07-02 14:00:00	8666.69
2014-07-02 14:30:00	8619.84
2014-07-02 15:00:00	8629.66
2014-07-02 15:30:00	8655.37
2014-07-02 16:00:00	8771.25
2014-07-02 16:30:00	9014.52
2014-07-02 17:00:00	9463.7
2014-07-02 17:30:00	10244.3
2014-07-02 18:00:00	10860.9
2014-07-02 18:30:00	10902.5
2014-07-02 19:00:00	10860.2
2014-07-02 19:30:00	10591.7
2014-07-02 20:00:00	10390
2014-07-02 20:30:00	10183.2
2014-07-02 21:00:00	10003.5
2014-07-02 21:30:00	9765.9
2014-07-02 22:00:00	9472.21
2014-07-02 22:30:00	9341
2014-07-02 23:00:00	8976.79
2014-07-02 23:30:00	8873.37
2014-07-03	8711.95
2014-07-03 00:30:00	8451.74
2014-07-03 01:00:00	8231.93
2014-07-03 01:30:00	8068.42
2014-07-03 02:00:00	7833.85
2014-07-03 02:30:00	7446.99
2014-07-03 03:00:00	7162.29
2014-07-03 03:30:00	6972.55
2014-07-03 04:00:00	6847.87
2014-07-03 04:30:00	6839.22
2014-07-03 05:00:00	6944.07
2014-07-03 05:30:00	7232.58
2014-07-03 06:00:00	7672.56
2014-07-03 06:30:00	8418.07
2014-07-03 07:00:00	9058.19
2014-07-03 07:30:00	9479.72
2014-07-03 08:00:00	9949.33
2014-07-03 08:30:00	10112
2014-07-03 09:00:00	10087.8
2014-07-03 09:30:00	10010.9
2014-07-03 10:00:00	9886.08
2014-07-03 10:30:00	9626.99
2014-07-03 11:00:00	9439.28
2014-07-03 11:30:00	9194.77
2014-07-03 12:00:00	9048.28
2014-07-03 12:30:00	8880.56
2014-07-03 13:00:00	8755.28
2014-07-03 13:30:00	8679.94
2014-07-03 14:00:00	8624.19
2014-07-03 14:30:00	8566.8
2014-07-03 15:00:00	8517.59
2014-07-03 15:30:00	8551.66
2014-07-03 16:00:00	8634.71
2014-07-03 16:30:00	8900.8
2014-07-03 17:00:00	9386.04
2014-07-03 17:30:00	10169.9
2014-07-03 18:00:00	10861.3
2014-07-03 18:30:00	10929.1
2014-07-03 19:00:00	10868.8
2014-07-03 19:30:00	10671.3
2014-07-03 20:00:00	10477.5
2014-07-03 20:30:00	10343.7
2014-07-03 21:00:00	10160.2
2014-07-03 21:30:00	9864.34
2014-07-03 22:00:00	9525.92
2014-07-03 22:30:00	9465.41
2014-07-03 23:00:00	9115.5
2014-07-03 23:30:00	8891.45
2014-07-04	8761.38
2014-07-04 00:30:00	8545.46
2014-07-04 01:00:00	8239.83
2014-07-04 01:30:00	8058.97
2014-07-04 02:00:00	7838.69
2014-07-04 02:30:00	7461.62
2014-07-04 03:00:00	7177.95
2014-07-04 03:30:00	6944.15
2014-07-04 04:00:00	6829.11
2014-07-04 04:30:00	6804.35
2014-07-04 05:00:00	6883.83
2014-07-04 05:30:00	7219.47
2014-07-04 06:00:00	7611.02
2014-07-04 06:30:00	8319.42
2014-07-04 07:00:00	8943.89
2014-07-04 07:30:00	9303.21
2014-07-04 08:00:00	9849.03
2014-07-04 08:30:00	10044.9
2014-07-04 09:00:00	9989
2014-07-04 09:30:00	9948.2
2014-07-04 10:00:00	9680.43
2014-07-04 10:30:00	9457.58
2014-07-04 11:00:00	9265.81
2014-07-04 11:30:00	8987.88
2014-07-04 12:00:00	8757.63
2014-07-04 12:30:00	8598.78
2014-07-04 13:00:00	8434.1
2014-07-04 13:30:00	8331.95
2014-07-04 14:00:00	8252.96
2014-07-04 14:30:00	8196.19
2014-07-04 15:00:00	8169.47
2014-07-04 15:30:00	8204.66
2014-07-04 16:00:00	8393.49
2014-07-04 16:30:00	8637.06
2014-07-04 17:00:00	9022.39
2014-07-04 17:30:00	9713.98
2014-07-04 18:00:00	10253.8
2014-07-04 18:30:00	10189.8
2014-07-04 19:00:00	10142.6
2014-07-04 19:30:00	9905.14
2014-07-04 20:00:00	9750.16
2014-07-04 20:30:00	9614.18
2014-07-04 21:00:00	9494.74
2014-07-04 21:30:00	9316.86
2014-07-04 22:00:00	9040.53
2014-07-04 22:30:00	9032.61
2014-07-04 23:00:00	8822.95
2014-07-04 23:30:00	8780.21
2014-07-05	8662.54
2014-07-05 00:30:00	8375.67
2014-07-05 01:00:00	8208.18
2014-07-05 01:30:00	7916.05
2014-07-05 02:00:00	7671.8
2014-07-05 02:30:00	7348.21
2014-07-05 03:00:00	7007.3
2014-07-05 03:30:00	6791.6
2014-07-05 04:00:00	6596.65
2014-07-05 04:30:00	6493
2014-07-05 05:00:00	6500.87
2014-07-05 05:30:00	6664.61
2014-07-05 06:00:00	6819.92
2014-07-05 06:30:00	7088.11
2014-07-05 07:00:00	7409.99
2014-07-05 07:30:00	7767.41
2014-07-05 08:00:00	8289.67
2014-07-05 08:30:00	8754.1
2014-07-05 09:00:00	8937.54
2014-07-05 09:30:00	9045.68
2014-07-05 10:00:00	8838.91
2014-07-05 10:30:00	8703.5
2014-07-05 11:00:00	8475.56
2014-07-05 11:30:00	8191.09
2014-07-05 12:00:00	8002.61
2014-07-05 12:30:00	7874
2014-07-05 13:00:00	7749.77
2014-07-05 13:30:00	7661.97
2014-07-05 14:00:00	7607.86
2014-07-05 14:30:00	7563.33
2014-07-05 15:00:00	7614.68
2014-07-05 15:30:00	7726.25
2014-07-05 16:00:00	7878.57
2014-07-05 16:30:00	8133.37
2014-07-05 17:00:00	8685.27
2014-07-05 17:30:00	9263.08
2014-07-05 18:00:00	9816.38
2014-07-05 18:30:00	9866.52
2014-07-05 19:00:00	9664
2014-07-05 19:30:00	9429.65
2014-07-05 20:00:00	9251.21
2014-07-05 20:30:00	9104.1
2014-07-05 21:00:00	8903.95
2014-07-05 21:30:00	8769.29
2014-07-05 22:00:00	8545.32
2014-07-05 22:30:00	8513.72
2014-07-05 23:00:00	8283.99
2014-07-05 23:30:00	8244.31
2014-07-06	8064.11
2014-07-06 00:30:00	7739.68
2014-07-06 01:00:00	7507.65
2014-07-06 01:30:00	7220.32
2014-07-06 02:00:00	7046.36
2014-07-06 02:30:00	6715.84
2014-07-06 03:00:00	6531.1
2014-07-06 03:30:00	6301.3
2014-07-06 04:00:00	6225.75
2014-07-06 04:30:00	6184.53
2014-07-06 05:00:00	6179.84
2014-07-06 05:30:00	6308.25
2014-07-06 06:00:00	6394.99
2014-07-06 06:30:00	6615.04
2014-07-06 07:00:00	6845.16
2014-07-06 07:30:00	7158.62
2014-07-06 08:00:00	7660.21
2014-07-06 08:30:00	8133.19
2014-07-06 09:00:00	8369.09
2014-07-06 09:30:00	8559.17
2014-07-06 10:00:00	8466.07
2014-07-06 10:30:00	8380.37
2014-07-06 11:00:00	8157.67
2014-07-06 11:30:00	7959.07
2014-07-06 12:00:00	7830.2
2014-07-06 12:30:00	7722.9
2014-07-06 13:00:00	7586.28
2014-07-06 13:30:00	7495.03
2014-07-06 14:00:00	7420.96
2014-07-06 14:30:00	7448.89
2014-07-06 15:00:00	7463.23
2014-07-06 15:30:00	7669.05
2014-07-06 16:00:00	7945.32
2014-07-06 16:30:00	8245.5
2014-07-06 17:00:00	8760.18
2014-07-06 17:30:00	9415.85
2014-07-06 18:00:00	9954.25
2014-07-06 18:30:00	10127.6
2014-07-06 19:00:00	10035.8
2014-07-06 19:30:00	9763.34
2014-07-06 20:00:00	9497.22
2014-07-06 20:30:00	9398.43
2014-07-06 21:00:00	9219.11
2014-07-06 21:30:00	9079.65
2014-07-06 22:00:00	8846.45
2014-07-06 22:30:00	8605.69
2014-07-06 23:00:00	8315.89
2014-07-06 23:30:00	8146.02
2014-07-07	7901.91
2014-07-07 00:30:00	7587.38
2014-07-07 01:00:00	7375.29
2014-07-07 01:30:00	7219.07
2014-07-07 02:00:00	6999.93
2014-07-07 02:30:00	6767.35
2014-07-07 03:00:00	6571.96
2014-07-07 03:30:00	6466.29
2014-07-07 04:00:00	6434.18
2014-07-07 04:30:00	6409.48
2014-07-07 05:00:00	6552.68
2014-07-07 05:30:00	6915.94
2014-07-07 06:00:00	7277.14
2014-07-07 06:30:00	8038.28
2014-07-07 07:00:00	8683.67
2014-07-07 07:30:00	9156.07
2014-07-07 08:00:00	9678.67
2014-07-07 08:30:00	9916.41
2014-07-07 09:00:00	9876.65
2014-07-07 09:30:00	9819.52
2014-07-07 10:00:00	9601.17
2014-07-07 10:30:00	9469.28
2014-07-07 11:00:00	9276.8
2014-07-07 11:30:00	9028.54
2014-07-07 12:00:00	8844.01
2014-07-07 12:30:00	8796.29
2014-07-07 13:00:00	8768.09
2014-07-07 13:30:00	8676.75
2014-07-07 14:00:00	8568.37
2014-07-07 14:30:00	8506.05
2014-07-07 15:00:00	8510.35
2014-07-07 15:30:00	8612.94
2014-07-07 16:00:00	8810.18
2014-07-07 16:30:00	9036.3
2014-07-07 17:00:00	9566.31
2014-07-07 17:30:00	10309.9
2014-07-07 18:00:00	10960.9
2014-07-07 18:30:00	10989.3
2014-07-07 19:00:00	10846.9
2014-07-07 19:30:00	10570.1
2014-07-07 20:00:00	10422.9
2014-07-07 20:30:00	10159.2
2014-07-07 21:00:00	9979.25
2014-07-07 21:30:00	9702.89
2014-07-07 22:00:00	9392.2
2014-07-07 22:30:00	9306.37
2014-07-07 23:00:00	8954.19
2014-07-07 23:30:00	8796.32
2014-07-08	8691.13
2014-07-08 00:30:00	8434.66
2014-07-08 01:00:00	8204.53
2014-07-08 01:30:00	8030.86
2014-07-08 02:00:00	7801.28
2014-07-08 02:30:00	7415.92
2014-07-08 03:00:00	7131.36
2014-07-08 03:30:00	6929.61
2014-07-08 04:00:00	6801.18
2014-07-08 04:30:00	6825.9
2014-07-08 05:00:00	6913.33
2014-07-08 05:30:00	7214.03
2014-07-08 06:00:00	7582.91
2014-07-08 06:30:00	8321.77
2014-07-08 07:00:00	8969.11
2014-07-08 07:30:00	9462.89
2014-07-08 08:00:00	9902.54
2014-07-08 08:30:00	10157.8
2014-07-08 09:00:00	10080.7
2014-07-08 09:30:00	10002.3
2014-07-08 10:00:00	9844.26
2014-07-08 10:30:00	9676.66
2014-07-08 11:00:00	9473.85
2014-07-08 11:30:00	9197.87
2014-07-08 12:00:00	9000.79
2014-07-08 12:30:00	8878.32
2014-07-08 13:00:00	8817.03
2014-07-08 13:30:00	8712.88
2014-07-08 14:00:00	8691.35
2014-07-08 14:30:00	8652.38
2014-07-08 15:00:00	8628.24
2014-07-08 15:30:00	8702.45
2014-07-08 16:00:00	8831.39
2014-07-08 16:30:00	9026.51
2014-07-08 17:00:00	9518.99
2014-07-08 17:30:00	10311
2014-07-08 18:00:00	10952.9
2014-07-08 18:30:00	11068.3
2014-07-08 19:00:00	11019.9
2014-07-08 19:30:00	10770.2
2014-07-08 20:00:00	10526.2
2014-07-08 20:30:00	10378.8
2014-07-08 21:00:00	10208.3
2014-07-08 21:30:00	9916.13
2014-07-08 22:00:00	9576.54
2014-07-08 22:30:00	9426.56
2014-07-08 23:00:00	9064.75
2014-07-08 23:30:00	8866.2
2014-07-09	8712.81
2014-07-09 00:30:00	8447.77
2014-07-09 01:00:00	8191.13
2014-07-09 01:30:00	8042.69
2014-07-09 02:00:00	7802.52
2014-07-09 02:30:00	7441.88
2014-07-09 03:00:00	7117.66
2014-07-09 03:30:00	6912.78
2014-07-09 04:00:00	6768.99
2014-07-09 04:30:00	6732.15
2014-07-09 05:00:00	6840.74
2014-07-09 05:30:00	7187.88
2014-07-09 06:00:00	7590.25
2014-07-09 06:30:00	8415.92
2014-07-09 07:00:00	9135.27
2014-07-09 07:30:00	9587.49
2014-07-09 08:00:00	9964.76
2014-07-09 08:30:00	10122.5
2014-07-09 09:00:00	10048.2
2014-07-09 09:30:00	9900.56
2014-07-09 10:00:00	9689.25
2014-07-09 10:30:00	9492.29
2014-07-09 11:00:00	9294.51
2014-07-09 11:30:00	9109.6
2014-07-09 12:00:00	8947.04
2014-07-09 12:30:00	8833.99
2014-07-09 13:00:00	8720.99
2014-07-09 13:30:00	8634.67
2014-07-09 14:00:00	8663.05
2014-07-09 14:30:00	8587
2014-07-09 15:00:00	8562.83
2014-07-09 15:30:00	8663.74
2014-07-09 16:00:00	8813.22
2014-07-09 16:30:00	9087.2
2014-07-09 17:00:00	9546.61
2014-07-09 17:30:00	10170.8
2014-07-09 18:00:00	10715.7
2014-07-09 18:30:00	10699.1
2014-07-09 19:00:00	10589.6
2014-07-09 19:30:00	10411.7
2014-07-09 20:00:00	10247.6
2014-07-09 20:30:00	10018.3
2014-07-09 21:00:00	9792.14
2014-07-09 21:30:00	9541.54
2014-07-09 22:00:00	9264.53
2014-07-09 22:30:00	9215.93
2014-07-09 23:00:00	8848.84
2014-07-09 23:30:00	8674.33
2014-07-10	8455.16
2014-07-10 00:30:00	8204.3
2014-07-10 01:00:00	7988.71
2014-07-10 01:30:00	7819.8
2014-07-10 02:00:00	7602.23
2014-07-10 02:30:00	7267.04
2014-07-10 03:00:00	6951.5
2014-07-10 03:30:00	6731.41
2014-07-10 04:00:00	6631.7
2014-07-10 04:30:00	6611.87
2014-07-10 05:00:00	6693.58
2014-07-10 05:30:00	6978.41
2014-07-10 06:00:00	7375.48
2014-07-10 06:30:00	8158.49
2014-07-10 07:00:00	8780.05
2014-07-10 07:30:00	9222.92
2014-07-10 08:00:00	9558.37
2014-07-10 08:30:00	9786.04
2014-07-10 09:00:00	9702.65
2014-07-10 09:30:00	9691.01
2014-07-10 10:00:00	9549.39
2014-07-10 10:30:00	9409.91
2014-07-10 11:00:00	9226.84
2014-07-10 11:30:00	9050.84
2014-07-10 12:00:00	8944.8
2014-07-10 12:30:00	8889.04
2014-07-10 13:00:00	8816.07
2014-07-10 13:30:00	8737.84
2014-07-10 14:00:00	8706.17
2014-07-10 14:30:00	8661.75
2014-07-10 15:00:00	8708.73
2014-07-10 15:30:00	8780.4
2014-07-10 16:00:00	8896.64
2014-07-10 16:30:00	9139.81
2014-07-10 17:00:00	9612.22
2014-07-10 17:30:00	10336.1
2014-07-10 18:00:00	11037.4
2014-07-10 18:30:00	11066.9
2014-07-10 19:00:00	11016.4
2014-07-10 19:30:00	10763.3
2014-07-10 20:00:00	10565.2
2014-07-10 20:30:00	10320.8
2014-07-10 21:00:00	10118.1
2014-07-10 21:30:00	9793.33
2014-07-10 22:00:00	9419.91
2014-07-10 22:30:00	9311.29
2014-07-10 23:00:00	8875.8
2014-07-10 23:30:00	8743.58
2014-07-11	8594.63
2014-07-11 00:30:00	8299.86
2014-07-11 01:00:00	8065.39
2014-07-11 01:30:00	7875.89
2014-07-11 02:00:00	7648.71
2014-07-11 02:30:00	7324.92
2014-07-11 03:00:00	7010.19
2014-07-11 03:30:00	6768.19
2014-07-11 04:00:00	6624.86
2014-07-11 04:30:00	6626.88
2014-07-11 05:00:00	6739.93
2014-07-11 05:30:00	7061.33
2014-07-11 06:00:00	7437.03
2014-07-11 06:30:00	8104.46
2014-07-11 07:00:00	8737.91
2014-07-11 07:30:00	9084.65
2014-07-11 08:00:00	9555.4
2014-07-11 08:30:00	9731.25
2014-07-11 09:00:00	9662.8
2014-07-11 09:30:00	9583.39
2014-07-11 10:00:00	9448.59
2014-07-11 10:30:00	9267.68
2014-07-11 11:00:00	9067.97
2014-07-11 11:30:00	8868.07
2014-07-11 12:00:00	8730.32
2014-07-11 12:30:00	8570.11
2014-07-11 13:00:00	8433.76
2014-07-11 13:30:00	8341.2
2014-07-11 14:00:00	8277.71
2014-07-11 14:30:00	8263.91
2014-07-11 15:00:00	8280.22
2014-07-11 15:30:00	8332.01
2014-07-11 16:00:00	8437.89
2014-07-11 16:30:00	8666.19
2014-07-11 17:00:00	9020.22
2014-07-11 17:30:00	9750.6
2014-07-11 18:00:00	10416.2
2014-07-11 18:30:00	10437.1
2014-07-11 19:00:00	10353
2014-07-11 19:30:00	10202
2014-07-11 20:00:00	10019.4
2014-07-11 20:30:00	9910.43
2014-07-11 21:00:00	9689.37
2014-07-11 21:30:00	9483.15
2014-07-11 22:00:00	9248.57
2014-07-11 22:30:00	9286.28
2014-07-11 23:00:00	9001.07
2014-07-11 23:30:00	8900.24
2014-07-12	8769.06
2014-07-12 00:30:00	8486.61
2014-07-12 01:00:00	8242.03
2014-07-12 01:30:00	8008.44
2014-07-12 02:00:00	7720.08
2014-07-12 02:30:00	7311.99
2014-07-12 03:00:00	6997.45
2014-07-12 03:30:00	6769.52
2014-07-12 04:00:00	6582.47
2014-07-12 04:30:00	6545.63
2014-07-12 05:00:00	6568.63
2014-07-12 05:30:00	6671.94
2014-07-12 06:00:00	6826.68
2014-07-12 06:30:00	7135.35
2014-07-12 07:00:00	7464.87
2014-07-12 07:30:00	7934.28
2014-07-12 08:00:00	8491.36
2014-07-12 08:30:00	8931.59
2014-07-12 09:00:00	9155.46
2014-07-12 09:30:00	9335.67
2014-07-12 10:00:00	9109.68
2014-07-12 10:30:00	8943.9
2014-07-12 11:00:00	8621.81
2014-07-12 11:30:00	8395.1
2014-07-12 12:00:00	8226.64
2014-07-12 12:30:00	8033.23
2014-07-12 13:00:00	7947.93
2014-07-12 13:30:00	7835.28
2014-07-12 14:00:00	7742.22
2014-07-12 14:30:00	7732.33
2014-07-12 15:00:00	7790.3
2014-07-12 15:30:00	7918.68
2014-07-12 16:00:00	8107.58
2014-07-12 16:30:00	8454.99
2014-07-12 17:00:00	8906.87
2014-07-12 17:30:00	9437.68
2014-07-12 18:00:00	10006.5
2014-07-12 18:30:00	10031.2
2014-07-12 19:00:00	9881.43
2014-07-12 19:30:00	9653.76
2014-07-12 20:00:00	9401.85
2014-07-12 20:30:00	9227.51
2014-07-12 21:00:00	9136.01
2014-07-12 21:30:00	9038.12
2014-07-12 22:00:00	8824.03
2014-07-12 22:30:00	8760.65
2014-07-12 23:00:00	8486.55
2014-07-12 23:30:00	8428.16
2014-07-13	8235.02
2014-07-13 00:30:00	7941.47
2014-07-13 01:00:00	7687.99
2014-07-13 01:30:00	7440.48
2014-07-13 02:00:00	7236.25
2014-07-13 02:30:00	6912.76
2014-07-13 03:00:00	6678.3
2014-07-13 03:30:00	6545.01
2014-07-13 04:00:00	6442.35
2014-07-13 04:30:00	6443.75
2014-07-13 05:00:00	6483.83
2014-07-13 05:30:00	6546.7
2014-07-13 06:00:00	6707.24
2014-07-13 06:30:00	6963.51
2014-07-13 07:00:00	7189.67
2014-07-13 07:30:00	7595.48
2014-07-13 08:00:00	8024.83
2014-07-13 08:30:00	8505.52
2014-07-13 09:00:00	8723.61
2014-07-13 09:30:00	8881.94
2014-07-13 10:00:00	8824.48
2014-07-13 10:30:00	8658.08
2014-07-13 11:00:00	8473.1
2014-07-13 11:30:00	8243.42
2014-07-13 12:00:00	8076.4
2014-07-13 12:30:00	7975.91
2014-07-13 13:00:00	7865.53
2014-07-13 13:30:00	7843.34
2014-07-13 14:00:00	7768.21
2014-07-13 14:30:00	7778.12
2014-07-13 15:00:00	7867.02
2014-07-13 15:30:00	8026.47
2014-07-13 16:00:00	8240.3
2014-07-13 16:30:00	8560.67
2014-07-13 17:00:00	9040.42
2014-07-13 17:30:00	9691.55
2014-07-13 18:00:00	10509.5
2014-07-13 18:30:00	10627.9
2014-07-13 19:00:00	10489.9
2014-07-13 19:30:00	10303.6
2014-07-13 20:00:00	10083.8
2014-07-13 20:30:00	9932.67
2014-07-13 21:00:00	9793.72
2014-07-13 21:30:00	9497.91
2014-07-13 22:00:00	9154.8
2014-07-13 22:30:00	8929.78
2014-07-13 23:00:00	8608.63
2014-07-13 23:30:00	8404
2014-07-14	8082.73
2014-07-14 00:30:00	7810.96
2014-07-14 01:00:00	7603.57
2014-07-14 01:30:00	7430.14
2014-07-14 02:00:00	7287.76
2014-07-14 02:30:00	7004.55
2014-07-14 03:00:00	6863.48
2014-07-14 03:30:00	6763.47
2014-07-14 04:00:00	6698.69
2014-07-14 04:30:00	6758.02
2014-07-14 05:00:00	6962.9
2014-07-14 05:30:00	7431.07
2014-07-14 06:00:00	7941.15
2014-07-14 06:30:00	8760.28
2014-07-14 07:00:00	9447.36
2014-07-14 07:30:00	9920.66
2014-07-14 08:00:00	10395.6
2014-07-14 08:30:00	10606.4
2014-07-14 09:00:00	10545.5
2014-07-14 09:30:00	10390.2
2014-07-14 10:00:00	10157.8
2014-07-14 10:30:00	9909.8
2014-07-14 11:00:00	9678.03
2014-07-14 11:30:00	9470.98
2014-07-14 12:00:00	9300.63
2014-07-14 12:30:00	9164.67
2014-07-14 13:00:00	9097.8
2014-07-14 13:30:00	9059.03
2014-07-14 14:00:00	9033.76
2014-07-14 14:30:00	9074.9
2014-07-14 15:00:00	9040.16
2014-07-14 15:30:00	9210.08
2014-07-14 16:00:00	9359.38
2014-07-14 16:30:00	9613.71
2014-07-14 17:00:00	10125.5
2014-07-14 17:30:00	10807.8
2014-07-14 18:00:00	11283
2014-07-14 18:30:00	11255
2014-07-14 19:00:00	11074.4
2014-07-14 19:30:00	10746.6
2014-07-14 20:00:00	10493.2
2014-07-14 20:30:00	10260.3
2014-07-14 21:00:00	9979.77
2014-07-14 21:30:00	9711.07
2014-07-14 22:00:00	9355.22
2014-07-14 22:30:00	9189.91
2014-07-14 23:00:00	8777.7
2014-07-14 23:30:00	8633.17
2014-07-15	8504.12
2014-07-15 00:30:00	8312.5
2014-07-15 01:00:00	8132.88
2014-07-15 01:30:00	7968.49
2014-07-15 02:00:00	7759.33
2014-07-15 02:30:00	7369.73
2014-07-15 03:00:00	7101.19
2014-07-15 03:30:00	6912.58
2014-07-15 04:00:00	6794.94
2014-07-15 04:30:00	6768.89
2014-07-15 05:00:00	6859.4
2014-07-15 05:30:00	7147.95
2014-07-15 06:00:00	7514.46
2014-07-15 06:30:00	8293.86
2014-07-15 07:00:00	9118.4
2014-07-15 07:30:00	9591.56
2014-07-15 08:00:00	9994.08
2014-07-15 08:30:00	10107.2
2014-07-15 09:00:00	9975.29
2014-07-15 09:30:00	9960.48
2014-07-15 10:00:00	9854.79
2014-07-15 10:30:00	9861.87
2014-07-15 11:00:00	9793.47
2014-07-15 11:30:00	9631.48
2014-07-15 12:00:00	9588.52
2014-07-15 12:30:00	9570.97
2014-07-15 13:00:00	9540.02
2014-07-15 13:30:00	9524.45
2014-07-15 14:00:00	9491.9
2014-07-15 14:30:00	9516.29
2014-07-15 15:00:00	9533.21
2014-07-15 15:30:00	9531.7
2014-07-15 16:00:00	9668.52
2014-07-15 16:30:00	9971.24
2014-07-15 17:00:00	10331.3
2014-07-15 17:30:00	10864.3
2014-07-15 18:00:00	11235.6
2014-07-15 18:30:00	11206.2
2014-07-15 19:00:00	11068.3
2014-07-15 19:30:00	10731.2
2014-07-15 20:00:00	10483.6
2014-07-15 20:30:00	10275.9
2014-07-15 21:00:00	10027.5
2014-07-15 21:30:00	9643.69
2014-07-15 22:00:00	9227.26
2014-07-15 22:30:00	9124.13
2014-07-15 23:00:00	8787.15
2014-07-15 23:30:00	8576.68
2014-07-16	8528.7
2014-07-16 00:30:00	8313.54
2014-07-16 01:00:00	8064.57
2014-07-16 01:30:00	7916.93
2014-07-16 02:00:00	7716.03
2014-07-16 02:30:00	7403.05
2014-07-16 03:00:00	6968.42
2014-07-16 03:30:00	6727.89
2014-07-16 04:00:00	6586.45
2014-07-16 04:30:00	6589.91
2014-07-16 05:00:00	6680.89
2014-07-16 05:30:00	7048.1
2014-07-16 06:00:00	7427.86
2014-07-16 06:30:00	8126.17
2014-07-16 07:00:00	8831.44
2014-07-16 07:30:00	9314.57
2014-07-16 08:00:00	9775.69
2014-07-16 08:30:00	9930.4
2014-07-16 09:00:00	9887.23
2014-07-16 09:30:00	9844.16
2014-07-16 10:00:00	9876.86
2014-07-16 10:30:00	9756.29
2014-07-16 11:00:00	9708.88
2014-07-16 11:30:00	9525.92
2014-07-16 12:00:00	9326.97
2014-07-16 12:30:00	9120.36
2014-07-16 13:00:00	8912.53
2014-07-16 13:30:00	8833.41
2014-07-16 14:00:00	8769.04
2014-07-16 14:30:00	8622.53
2014-07-16 15:00:00	8618.04
2014-07-16 15:30:00	8634.26
2014-07-16 16:00:00	8778.69
2014-07-16 16:30:00	8966.63
2014-07-16 17:00:00	9360.82
2014-07-16 17:30:00	9997.41
2014-07-16 18:00:00	10692.9
2014-07-16 18:30:00	10778.6
2014-07-16 19:00:00	10669.5
2014-07-16 19:30:00	10355.9
2014-07-16 20:00:00	10182.2
2014-07-16 20:30:00	9994.21
2014-07-16 21:00:00	9746.9
2014-07-16 21:30:00	9472.46
2014-07-16 22:00:00	9177.1
2014-07-16 22:30:00	9110.8
2014-07-16 23:00:00	8709
2014-07-16 23:30:00	8585.94
2014-07-17	8425.7
2014-07-17 00:30:00	8223.96
2014-07-17 01:00:00	8010.58
2014-07-17 01:30:00	7821.5
2014-07-17 02:00:00	7616.45
2014-07-17 02:30:00	7219.78
2014-07-17 03:00:00	6928.52
2014-07-17 03:30:00	6674.25
2014-07-17 04:00:00	6558.06
2014-07-17 04:30:00	6526.6
2014-07-17 05:00:00	6640.6
2014-07-17 05:30:00	6976.53
2014-07-17 06:00:00	7420.56
2014-07-17 06:30:00	8211.05
2014-07-17 07:00:00	9047.26
2014-07-17 07:30:00	9509.71
2014-07-17 08:00:00	9893.59
2014-07-17 08:30:00	9899.16
2014-07-17 09:00:00	9622.01
2014-07-17 09:30:00	9485.55
2014-07-17 10:00:00	9286.88
2014-07-17 10:30:00	9135.89
2014-07-17 11:00:00	8997.65
2014-07-17 11:30:00	8844.83
2014-07-17 12:00:00	8729.34
2014-07-17 12:30:00	8636.7
2014-07-17 13:00:00	8562.03
2014-07-17 13:30:00	8551.66
2014-07-17 14:00:00	8537.36
2014-07-17 14:30:00	8515.02
2014-07-17 15:00:00	8492.65
2014-07-17 15:30:00	8518.39
2014-07-17 16:00:00	8690.19
2014-07-17 16:30:00	8886.06
2014-07-17 17:00:00	9306.36
2014-07-17 17:30:00	10007.5
2014-07-17 18:00:00	10745.2
2014-07-17 18:30:00	10874.1
2014-07-17 19:00:00	10823.6
2014-07-17 19:30:00	10658.9
2014-07-17 20:00:00	10496.7
2014-07-17 20:30:00	10385.8
2014-07-17 21:00:00	10142.1
2014-07-17 21:30:00	9837.08
2014-07-17 22:00:00	9478.05
2014-07-17 22:30:00	9377.21
2014-07-17 23:00:00	8989.66
2014-07-17 23:30:00	8794.07
2014-07-18	8648.6
2014-07-18 00:30:00	8345.08
2014-07-18 01:00:00	8186.36
2014-07-18 01:30:00	8023.17
2014-07-18 02:00:00	7744.51
2014-07-18 02:30:00	7436.69
2014-07-18 03:00:00	7157.97
2014-07-18 03:30:00	6914.36
2014-07-18 04:00:00	6777.2
2014-07-18 04:30:00	6762.79
2014-07-18 05:00:00	6835.87
2014-07-18 05:30:00	7198.59
2014-07-18 06:00:00	7558.63
2014-07-18 06:30:00	8323.16
2014-07-18 07:00:00	9190.62
2014-07-18 07:30:00	9694.05
2014-07-18 08:00:00	10266
2014-07-18 08:30:00	10345.7
2014-07-18 09:00:00	10088.4
2014-07-18 09:30:00	10055.2
2014-07-18 10:00:00	9892.85
2014-07-18 10:30:00	9786.13
2014-07-18 11:00:00	9567.63
2014-07-18 11:30:00	9354.59
2014-07-18 12:00:00	9237.85
2014-07-18 12:30:00	9149.21
2014-07-18 13:00:00	9021.3
2014-07-18 13:30:00	8935.31
2014-07-18 14:00:00	8908.46
2014-07-18 14:30:00	8940.33
2014-07-18 15:00:00	8882.44
2014-07-18 15:30:00	8994.08
2014-07-18 16:00:00	9290.95
2014-07-18 16:30:00	9552.73
2014-07-18 17:00:00	10046.5
2014-07-18 17:30:00	10617
2014-07-18 18:00:00	11247
2014-07-18 18:30:00	11210.7
2014-07-18 19:00:00	11141.4
2014-07-18 19:30:00	10854.6
2014-07-18 20:00:00	10669.8
2014-07-18 20:30:00	10520.1
2014-07-18 21:00:00	10317.5
2014-07-18 21:30:00	10123.5
2014-07-18 22:00:00	9789.21
2014-07-18 22:30:00	9722.42
2014-07-18 23:00:00	9404.81
2014-07-18 23:30:00	9293.67
2014-07-19	9082.93
2014-07-19 00:30:00	8810.65
2014-07-19 01:00:00	8525.22
2014-07-19 01:30:00	8276.04
2014-07-19 02:00:00	7908.97
2014-07-19 02:30:00	7582.34
2014-07-19 03:00:00	7293.98
2014-07-19 03:30:00	7010.5
2014-07-19 04:00:00	6837.17
2014-07-19 04:30:00	6783.12
2014-07-19 05:00:00	6823.3
2014-07-19 05:30:00	6947.67
2014-07-19 06:00:00	7101.82
2014-07-19 06:30:00	7451.4
2014-07-19 07:00:00	7837.85
2014-07-19 07:30:00	8245.62
2014-07-19 08:00:00	8811.7
2014-07-19 08:30:00	9260.83
2014-07-19 09:00:00	9394.16
2014-07-19 09:30:00	9560.61
2014-07-19 10:00:00	9342.61
2014-07-19 10:30:00	9257.69
2014-07-19 11:00:00	9117.3
2014-07-19 11:30:00	8997.67
2014-07-19 12:00:00	8919.68
2014-07-19 12:30:00	8797.2
2014-07-19 13:00:00	8739.12
2014-07-19 13:30:00	8591.93
2014-07-19 14:00:00	8507.17
2014-07-19 14:30:00	8470.53
2014-07-19 15:00:00	8483.47
2014-07-19 15:30:00	8568.71
2014-07-19 16:00:00	8740.66
2014-07-19 16:30:00	8999.99
2014-07-19 17:00:00	9425.78
2014-07-19 17:30:00	9857.24
2014-07-19 18:00:00	10435.6
2014-07-19 18:30:00	10449.2
2014-07-19 19:00:00	10280.9
2014-07-19 19:30:00	10006.2
2014-07-19 20:00:00	9746.27
2014-07-19 20:30:00	9615.86
2014-07-19 21:00:00	9438.64
2014-07-19 21:30:00	9252.13
2014-07-19 22:00:00	9074.49
2014-07-19 22:30:00	9005.58
2014-07-19 23:00:00	8760.95
2014-07-19 23:30:00	8634.37
2014-07-20	8401.3
2014-07-20 00:30:00	8050.05
2014-07-20 01:00:00	7793.32
2014-07-20 01:30:00	7546.87
2014-07-20 02:00:00	7320.47
2014-07-20 02:30:00	7009.15
2014-07-20 03:00:00	6843.15
2014-07-20 03:30:00	6667.23
2014-07-20 04:00:00	6543.2
2014-07-20 04:30:00	6518.89
2014-07-20 05:00:00	6538.63
2014-07-20 05:30:00	6619.9
2014-07-20 06:00:00	6673.14
2014-07-20 06:30:00	6941.36
2014-07-20 07:00:00	7138.28
2014-07-20 07:30:00	7451.67
2014-07-20 08:00:00	7898.69
2014-07-20 08:30:00	8408.45
2014-07-20 09:00:00	8696.77
2014-07-20 09:30:00	8914.98
2014-07-20 10:00:00	8977.44
2014-07-20 10:30:00	8944.38
2014-07-20 11:00:00	8826.58
2014-07-20 11:30:00	8732.03
2014-07-20 12:00:00	8598.72
2014-07-20 12:30:00	8559.06
2014-07-20 13:00:00	8410.31
2014-07-20 13:30:00	8309.35
2014-07-20 14:00:00	8267.35
2014-07-20 14:30:00	8215.59
2014-07-20 15:00:00	8246.24
2014-07-20 15:30:00	8332.23
2014-07-20 16:00:00	8508.65
2014-07-20 16:30:00	8779.47
2014-07-20 17:00:00	9265.87
2014-07-20 17:30:00	9682.37
2014-07-20 18:00:00	10332
2014-07-20 18:30:00	10445.3
2014-07-20 19:00:00	10388
2014-07-20 19:30:00	10096.9
2014-07-20 20:00:00	9912.42
2014-07-20 20:30:00	9782.36
2014-07-20 21:00:00	9669.33
2014-07-20 21:30:00	9341.37
2014-07-20 22:00:00	8999.93
2014-07-20 22:30:00	8827.08
2014-07-20 23:00:00	8468.55
2014-07-20 23:30:00	8325.02
2014-07-21	8142.92
2014-07-21 00:30:00	7840.6
2014-07-21 01:00:00	7623.13
2014-07-21 01:30:00	7483.51
2014-07-21 02:00:00	7267.02
2014-07-21 02:30:00	7072.91
2014-07-21 03:00:00	6802.47
2014-07-21 03:30:00	6746.19
2014-07-21 04:00:00	6653.96
2014-07-21 04:30:00	6704.09
2014-07-21 05:00:00	6840.47
2014-07-21 05:30:00	7153.03
2014-07-21 06:00:00	7604.91
2014-07-21 06:30:00	8507.91
2014-07-21 07:00:00	9325.5
2014-07-21 07:30:00	9908.53
2014-07-21 08:00:00	10380.8
2014-07-21 08:30:00	10461.6
2014-07-21 09:00:00	10163.6
2014-07-21 09:30:00	9987.9
2014-07-21 10:00:00	9895.04
2014-07-21 10:30:00	9721.16
2014-07-21 11:00:00	9609.66
2014-07-21 11:30:00	9394.59
2014-07-21 12:00:00	9253.62
2014-07-21 12:30:00	9148.05
2014-07-21 13:00:00	9126.51
2014-07-21 13:30:00	8976.74
2014-07-21 14:00:00	8929.77
2014-07-21 14:30:00	8879.52
2014-07-21 15:00:00	8888.5
2014-07-21 15:30:00	8924.58
2014-07-21 16:00:00	9083.67
2014-07-21 16:30:00	9415.61
2014-07-21 17:00:00	9798.44
2014-07-21 17:30:00	10379.4
2014-07-21 18:00:00	11108.2
2014-07-21 18:30:00	11125.1
2014-07-21 19:00:00	11061.4
2014-07-21 19:30:00	10801.8
2014-07-21 20:00:00	10539.4
2014-07-21 20:30:00	10361.1
2014-07-21 21:00:00	10129.7
2014-07-21 21:30:00	9869.71
2014-07-21 22:00:00	9488.76
2014-07-21 22:30:00	9395.31
2014-07-21 23:00:00	8968.12
2014-07-21 23:30:00	8849.12
2014-07-22	8685.68
2014-07-22 00:30:00	8467.37
2014-07-22 01:00:00	8260.9
2014-07-22 01:30:00	8058.93
2014-07-22 02:00:00	7919.5
2014-07-22 02:30:00	7582.88
2014-07-22 03:00:00	7322.46
2014-07-22 03:30:00	7116.93
2014-07-22 04:00:00	6965.27
2014-07-22 04:30:00	6922.5
2014-07-22 05:00:00	7034.36
2014-07-22 05:30:00	7389.67
2014-07-22 06:00:00	7803.66
2014-07-22 06:30:00	8564.69
2014-07-22 07:00:00	9450.56
2014-07-22 07:30:00	9866.71
2014-07-22 08:00:00	10278.7
2014-07-22 08:30:00	10259
2014-07-22 09:00:00	10000.2
2014-07-22 09:30:00	9841.99
2014-07-22 10:00:00	9692.19
2014-07-22 10:30:00	9449.12
2014-07-22 11:00:00	9337.06
2014-07-22 11:30:00	9117.86
2014-07-22 12:00:00	9002.68
2014-07-22 12:30:00	8903.28
2014-07-22 13:00:00	8814.49
2014-07-22 13:30:00	8773.27
2014-07-22 14:00:00	8741.75
2014-07-22 14:30:00	8730.97
2014-07-22 15:00:00	8698.05
2014-07-22 15:30:00	8672.99
2014-07-22 16:00:00	8871.9
2014-07-22 16:30:00	9060.34
2014-07-22 17:00:00	9410.62
2014-07-22 17:30:00	10071.4
2014-07-22 18:00:00	10814.8
2014-07-22 18:30:00	10913.8
2014-07-22 19:00:00	10867.2
2014-07-22 19:30:00	10678.6
2014-07-22 20:00:00	10463.6
2014-07-22 20:30:00	10286.8
2014-07-22 21:00:00	10091.6
2014-07-22 21:30:00	9811.24
2014-07-22 22:00:00	9457.92
2014-07-22 22:30:00	9351.1
2014-07-22 23:00:00	9005.37
2014-07-22 23:30:00	8864.13
2014-07-23	8759.11
2014-07-23 00:30:00	8552.09
2014-07-23 01:00:00	8345.73
2014-07-23 01:30:00	8145.61
2014-07-23 02:00:00	7935.06
2014-07-23 02:30:00	7557.45
2014-07-23 03:00:00	7231.38
2014-07-23 03:30:00	7036.19
2014-07-23 04:00:00	6961.73
2014-07-23 04:30:00	6927.54
2014-07-23 05:00:00	7063.51
2014-07-23 05:30:00	7373.69
2014-07-23 06:00:00	7816.6
2014-07-23 06:30:00	8618.05
2014-07-23 07:00:00	9416.1
2014-07-23 07:30:00	9903.67
2014-07-23 08:00:00	10227.5
2014-07-23 08:30:00	10242.4
2014-07-23 09:00:00	9937.65
2014-07-23 09:30:00	9772.49
2014-07-23 10:00:00	9590.5
2014-07-23 10:30:00	9425.01
2014-07-23 11:00:00	9239.92
2014-07-23 11:30:00	9058.47
2014-07-23 12:00:00	8852.93
2014-07-23 12:30:00	8776.13
2014-07-23 13:00:00	8710.38
2014-07-23 13:30:00	8669.35
2014-07-23 14:00:00	8625.77
2014-07-23 14:30:00	8567.76
2014-07-23 15:00:00	8604.69
2014-07-23 15:30:00	8606.55
2014-07-23 16:00:00	8784.67
2014-07-23 16:30:00	8988.77
2014-07-23 17:00:00	9451.36
2014-07-23 17:30:00	10113.8
2014-07-23 18:00:00	10793.6
2014-07-23 18:30:00	10871
2014-07-23 19:00:00	10808
2014-07-23 19:30:00	10555.2
2014-07-23 20:00:00	10405.5
2014-07-23 20:30:00	10218.2
2014-07-23 21:00:00	10030.2
2014-07-23 21:30:00	9753.02
2014-07-23 22:00:00	9438.5
2014-07-23 22:30:00	9387.57
2014-07-23 23:00:00	9018.24
2014-07-23 23:30:00	8866.66
2014-07-24	8731.3
2014-07-24 00:30:00	8483.03
2014-07-24 01:00:00	8316.81
2014-07-24 01:30:00	8095.95
2014-07-24 02:00:00	7836.21
2014-07-24 02:30:00	7496.45
2014-07-24 03:00:00	7138.31
2014-07-24 03:30:00	6960.9
2014-07-24 04:00:00	6860.29
2014-07-24 04:30:00	6837.96
2014-07-24 05:00:00	6968.72
2014-07-24 05:30:00	7270.25
2014-07-24 06:00:00	7744.66
2014-07-24 06:30:00	8543.26
2014-07-24 07:00:00	9310.33
2014-07-24 07:30:00	9782.56
2014-07-24 08:00:00	10195.8
2014-07-24 08:30:00	10146.2
2014-07-24 09:00:00	9915.67
2014-07-24 09:30:00	9918.07
2014-07-24 10:00:00	9858.45
2014-07-24 10:30:00	9777.25
2014-07-24 11:00:00	9657.48
2014-07-24 11:30:00	9469.14
2014-07-24 12:00:00	9429.18
2014-07-24 12:30:00	9373.16
2014-07-24 13:00:00	9257.88
2014-07-24 13:30:00	9138.61
2014-07-24 14:00:00	9075.11
2014-07-24 14:30:00	8999.34
2014-07-24 15:00:00	8966.5
2014-07-24 15:30:00	8996.88
2014-07-24 16:00:00	9209.27
2014-07-24 16:30:00	9399.89
2014-07-24 17:00:00	9700.36
2014-07-24 17:30:00	10208.3
2014-07-24 18:00:00	10826.3
2014-07-24 18:30:00	10881.3
2014-07-24 19:00:00	10819.9
2014-07-24 19:30:00	10559.5
2014-07-24 20:00:00	10299
2014-07-24 20:30:00	10206.2
2014-07-24 21:00:00	9988.39
2014-07-24 21:30:00	9644.81
2014-07-24 22:00:00	9382
2014-07-24 22:30:00	9337.96
2014-07-24 23:00:00	8949.15
2014-07-24 23:30:00	8766.78
2014-07-25	8644.46
2014-07-25 00:30:00	8408.38
2014-07-25 01:00:00	8209.16
2014-07-25 01:30:00	7967.94
2014-07-25 02:00:00	7724.05
2014-07-25 02:30:00	7377.7
2014-07-25 03:00:00	7107.91
2014-07-25 03:30:00	6859.65
2014-07-25 04:00:00	6770.88
2014-07-25 04:30:00	6753.32
2014-07-25 05:00:00	6876.44
2014-07-25 05:30:00	7201.77
2014-07-25 06:00:00	7577.8
2014-07-25 06:30:00	8357.89
2014-07-25 07:00:00	9133.46
2014-07-25 07:30:00	9602.15
2014-07-25 08:00:00	10002.5
2014-07-25 08:30:00	10111.1
2014-07-25 09:00:00	10058.6
2014-07-25 09:30:00	10036.7
2014-07-25 10:00:00	9973.08
2014-07-25 10:30:00	9873.68
2014-07-25 11:00:00	9747.94
2014-07-25 11:30:00	9607.23
2014-07-25 12:00:00	9420.89
2014-07-25 12:30:00	9183.54
2014-07-25 13:00:00	8944.11
2014-07-25 13:30:00	8823.51
2014-07-25 14:00:00	8712.3
2014-07-25 14:30:00	8602.83
2014-07-25 15:00:00	8639.5
2014-07-25 15:30:00	8669.52
2014-07-25 16:00:00	8772.21
2014-07-25 16:30:00	8964.06
2014-07-25 17:00:00	9255.27
2014-07-25 17:30:00	9731.71
2014-07-25 18:00:00	10260.6
2014-07-25 18:30:00	10191
2014-07-25 19:00:00	10003.7
2014-07-25 19:30:00	9761.88
2014-07-25 20:00:00	9545.67
2014-07-25 20:30:00	9386.02
2014-07-25 21:00:00	9249.55
2014-07-25 21:30:00	9057.05
2014-07-25 22:00:00	8835.22
2014-07-25 22:30:00	8884.68
2014-07-25 23:00:00	8680.92
2014-07-25 23:30:00	8566.16
2014-07-26	8487.41
2014-07-26 00:30:00	8256.9
2014-07-26 01:00:00	7991.7
2014-07-26 01:30:00	7781.01
2014-07-26 02:00:00	7551.23
2014-07-26 02:30:00	7204.2
2014-07-26 03:00:00	6838.45
2014-07-26 03:30:00	6613.74
2014-07-26 04:00:00	6485.44
2014-07-26 04:30:00	6405.77
2014-07-26 05:00:00	6441.46
2014-07-26 05:30:00	6570.32
2014-07-26 06:00:00	6626.4
2014-07-26 06:30:00	6914.85
2014-07-26 07:00:00	7263.36
2014-07-26 07:30:00	7600.88
2014-07-26 08:00:00	8050.48
2014-07-26 08:30:00	8542.22
2014-07-26 09:00:00	8837.49
2014-07-26 09:30:00	9172.84
2014-07-26 10:00:00	9101.31
2014-07-26 10:30:00	9187.99
2014-07-26 11:00:00	9066.47
2014-07-26 11:30:00	8977.85
2014-07-26 12:00:00	8774.82
2014-07-26 12:30:00	8622.05
2014-07-26 13:00:00	8239.68
2014-07-26 13:30:00	7970.83
2014-07-26 14:00:00	7921.44
2014-07-26 14:30:00	7861.04
2014-07-26 15:00:00	7897.44
2014-07-26 15:30:00	7776.82
2014-07-26 16:00:00	7860.72
2014-07-26 16:30:00	8039.94
2014-07-26 17:00:00	8424.42
2014-07-26 17:30:00	8820.11
2014-07-26 18:00:00	9497.35
2014-07-26 18:30:00	9603.47
2014-07-26 19:00:00	9442.83
2014-07-26 19:30:00	9210.12
2014-07-26 20:00:00	9066.88
2014-07-26 20:30:00	8889.85
2014-07-26 21:00:00	8821.69
2014-07-26 21:30:00	8729.44
2014-07-26 22:00:00	8562.92
2014-07-26 22:30:00	8530.44
2014-07-26 23:00:00	8342.18
2014-07-26 23:30:00	8221.68
2014-07-27	8095.79
2014-07-27 00:30:00	7823.6
2014-07-27 01:00:00	7594.76
2014-07-27 01:30:00	7339.56
2014-07-27 02:00:00	7086.99
2014-07-27 02:30:00	6781.45
2014-07-27 03:00:00	6550.04
2014-07-27 03:30:00	6393.6
2014-07-27 04:00:00	6311.64
2014-07-27 04:30:00	6247.81
2014-07-27 05:00:00	6306.29
2014-07-27 05:30:00	6369.61
2014-07-27 06:00:00	6465.01
2014-07-27 06:30:00	6677.02
2014-07-27 07:00:00	6871.67
2014-07-27 07:30:00	7202.34
2014-07-27 08:00:00	7657.12
2014-07-27 08:30:00	8054.83
2014-07-27 09:00:00	8259.85
2014-07-27 09:30:00	8396.33
2014-07-27 10:00:00	8322.99
2014-07-27 10:30:00	8160.76
2014-07-27 11:00:00	7928.53
2014-07-27 11:30:00	7733.72
2014-07-27 12:00:00	7505.05
2014-07-27 12:30:00	7399.48
2014-07-27 13:00:00	7293.37
2014-07-27 13:30:00	7181.29
2014-07-27 14:00:00	7117.55
2014-07-27 14:30:00	7049.4
2014-07-27 15:00:00	7063.48
2014-07-27 15:30:00	7180.29
2014-07-27 16:00:00	7333.4
2014-07-27 16:30:00	7571.09
2014-07-27 17:00:00	8084.95
2014-07-27 17:30:00	8587.59
2014-07-27 18:00:00	9373.49
2014-07-27 18:30:00	9648.71
2014-07-27 19:00:00	9669.33
2014-07-27 19:30:00	9469.62
2014-07-27 20:00:00	9336.43
2014-07-27 20:30:00	9232.99
2014-07-27 21:00:00	9056.62
2014-07-27 21:30:00	8783.69
2014-07-27 22:00:00	8491.9
2014-07-27 22:30:00	8344.16
2014-07-27 23:00:00	8061.11
2014-07-27 23:30:00	7984.5
2014-07-28	7797.86
2014-07-28 00:30:00	7578.05
2014-07-28 01:00:00	7341.5
2014-07-28 01:30:00	7194.13
2014-07-28 02:00:00	7018.37
2014-07-28 02:30:00	6693.64
2014-07-28 03:00:00	6450.13
2014-07-28 03:30:00	6264.72
2014-07-28 04:00:00	6237.14
2014-07-28 04:30:00	6323.49
2014-07-28 05:00:00	6482.06
2014-07-28 05:30:00	6809.52
2014-07-28 06:00:00	7266.52
2014-07-28 06:30:00	8176.36
2014-07-28 07:00:00	9029.46
2014-07-28 07:30:00	9538.42
2014-07-28 08:00:00	9952.34
2014-07-28 08:30:00	9942.63
2014-07-28 09:00:00	9738.06
2014-07-28 09:30:00	9596.88
2014-07-28 10:00:00	9440.41
2014-07-28 10:30:00	9206.47
2014-07-28 11:00:00	9073.88
2014-07-28 11:30:00	8886
2014-07-28 12:00:00	8661.8
2014-07-28 12:30:00	8577.7
2014-07-28 13:00:00	8438.65
2014-07-28 13:30:00	8407.83
2014-07-28 14:00:00	8367.28
2014-07-28 14:30:00	8381.98
2014-07-28 15:00:00	8366.15
2014-07-28 15:30:00	8385.43
2014-07-28 16:00:00	8564.86
2014-07-28 16:30:00	8762.98
2014-07-28 17:00:00	9181.95
2014-07-28 17:30:00	9661.43
2014-07-28 18:00:00	10458.4
2014-07-28 18:30:00	10586.7
2014-07-28 19:00:00	10512.5
2014-07-28 19:30:00	10208.3
2014-07-28 20:00:00	10017.8
2014-07-28 20:30:00	9832.12
2014-07-28 21:00:00	9606.76
2014-07-28 21:30:00	9297.25
2014-07-28 22:00:00	8965.14
2014-07-28 22:30:00	8842.17
2014-07-28 23:00:00	8511.06
2014-07-28 23:30:00	8360.61
2014-07-29	8238.59
2014-07-29 00:30:00	8007.66
2014-07-29 01:00:00	7838.54
2014-07-29 01:30:00	7633.33
2014-07-29 02:00:00	7367.17
2014-07-29 02:30:00	7016.88
2014-07-29 03:00:00	6741.13
2014-07-29 03:30:00	6516.17
2014-07-29 04:00:00	6386.88
2014-07-29 04:30:00	6352.23
2014-07-29 05:00:00	6429.22
2014-07-29 05:30:00	6769.9
2014-07-29 06:00:00	7168.15
2014-07-29 06:30:00	8033.98
2014-07-29 07:00:00	8772.64
2014-07-29 07:30:00	9226.86
2014-07-29 08:00:00	9479.03
2014-07-29 08:30:00	9494.17
2014-07-29 09:00:00	9312.11
2014-07-29 09:30:00	9166.83
2014-07-29 10:00:00	9014.55
2014-07-29 10:30:00	8917.48
2014-07-29 11:00:00	8814.8
2014-07-29 11:30:00	8625.45
2014-07-29 12:00:00	8455.13
2014-07-29 12:30:00	8354.08
2014-07-29 13:00:00	8300.2
2014-07-29 13:30:00	8168.66
2014-07-29 14:00:00	8072.45
2014-07-29 14:30:00	8063.64
2014-07-29 15:00:00	8021.94
2014-07-29 15:30:00	8076.9
2014-07-29 16:00:00	8177.18
2014-07-29 16:30:00	8360.7
2014-07-29 17:00:00	8572.52
2014-07-29 17:30:00	9046.55
2014-07-29 18:00:00	9796.21
2014-07-29 18:30:00	9935.86
2014-07-29 19:00:00	9906.72
2014-07-29 19:30:00	9659.63
2014-07-29 20:00:00	9464.23
2014-07-29 20:30:00	9289.57
2014-07-29 21:00:00	9150.18
2014-07-29 21:30:00	8909.41
2014-07-29 22:00:00	8615.38
2014-07-29 22:30:00	8580.55
2014-07-29 23:00:00	8276.36
2014-07-29 23:30:00	8179.14
2014-07-30	8066.55
2014-07-30 00:30:00	7855.54
2014-07-30 01:00:00	7651.09
2014-07-30 01:30:00	7455.79
2014-07-30 02:00:00	7248.32
2014-07-30 02:30:00	6882.95
2014-07-30 03:00:00	6623.75
2014-07-30 03:30:00	6413.71
2014-07-30 04:00:00	6256.35
2014-07-30 04:30:00	6246.29
2014-07-30 05:00:00	6342.5
2014-07-30 05:30:00	6671.1
2014-07-30 06:00:00	7129.5
2014-07-30 06:30:00	7882.55
2014-07-30 07:00:00	8584.46
2014-07-30 07:30:00	8928.14
2014-07-30 08:00:00	9152.15
2014-07-30 08:30:00	9130.73
2014-07-30 09:00:00	8896.24
2014-07-30 09:30:00	8764.79
2014-07-30 10:00:00	8615.44
2014-07-30 10:30:00	8481.34
2014-07-30 11:00:00	8404.91
2014-07-30 11:30:00	8299
2014-07-30 12:00:00	8248.66
2014-07-30 12:30:00	8154.65
2014-07-30 13:00:00	8124.45
2014-07-30 13:30:00	8035.9
2014-07-30 14:00:00	8024.87
2014-07-30 14:30:00	7954.31
2014-07-30 15:00:00	7995.03
2014-07-30 15:30:00	7975.43
2014-07-30 16:00:00	8078.2
2014-07-30 16:30:00	8194.19
2014-07-30 17:00:00	8422.02
2014-07-30 17:30:00	8812.75
2014-07-30 18:00:00	9403.7
2014-07-30 18:30:00	9521.6
2014-07-30 19:00:00	9470.31
2014-07-30 19:30:00	9190.07
2014-07-30 20:00:00	9039.93
2014-07-30 20:30:00	8886.11
2014-07-30 21:00:00	8732.94
2014-07-30 21:30:00	8518.63
2014-07-30 22:00:00	8260.64
2014-07-30 22:30:00	8243.17
2014-07-30 23:00:00	7977.37
2014-07-30 23:30:00	7917.15
2014-07-31	7842.49
2014-07-31 00:30:00	7642.45
2014-07-31 01:00:00	7468.67
2014-07-31 01:30:00	7308.2
2014-07-31 02:00:00	7044.68
2014-07-31 02:30:00	6733.26
2014-07-31 03:00:00	6448.52
2014-07-31 03:30:00	6282.9
2014-07-31 04:00:00	6157.55
2014-07-31 04:30:00	6166.92
2014-07-31 05:00:00	6244.31
2014-07-31 05:30:00	6569.45
2014-07-31 06:00:00	6970
2014-07-31 06:30:00	7713.08
2014-07-31 07:00:00	8406.3
2014-07-31 07:30:00	8757.4
2014-07-31 08:00:00	9029.15
2014-07-31 08:30:00	8934.3
2014-07-31 09:00:00	8671.58
2014-07-31 09:30:00	8562.47
2014-07-31 10:00:00	8432.62
2014-07-31 10:30:00	8348.86
2014-07-31 11:00:00	8251.94
2014-07-31 11:30:00	8148.66
2014-07-31 12:00:00	8068.08
2014-07-31 12:30:00	8007.85
2014-07-31 13:00:00	7929.74
2014-07-31 13:30:00	7941.82
2014-07-31 14:00:00	7933.42
2014-07-31 14:30:00	7922.36
2014-07-31 15:00:00	7925.72
2014-07-31 15:30:00	7929.14
2014-07-31 16:00:00	8062.15
2014-07-31 16:30:00	8138.45
2014-07-31 17:00:00	8300.76
2014-07-31 17:30:00	8638.38
2014-07-31 18:00:00	9222.85
2014-07-31 18:30:00	9344.26
2014-07-31 19:00:00	9278.5
2014-07-31 19:30:00	9083.57
2014-07-31 20:00:00	8885.49
2014-07-31 20:30:00	8726.28
2014-07-31 21:00:00	8575.21
2014-07-31 21:30:00	8340.98
2014-07-31 22:00:00	8079.49
2014-07-31 22:30:00	8127.02
2014-07-31 23:00:00	7939.3
2014-07-31 23:30:00	7921.63
2014-08-01	7845.13

## Sheet: NSW-Oct
SETTLEMENTDATE	TOTALDEMAND
2014-10-01 00:30:00	7133.95
2014-10-01 01:00:00	6908.57
2014-10-01 01:30:00	6714.2
2014-10-01 02:00:00	6491.69
2014-10-01 02:30:00	6205.44
2014-10-01 03:00:00	6011.75
2014-10-01 03:30:00	5817.39
2014-10-01 04:00:00	5750.26
2014-10-01 04:30:00	5737.85
2014-10-01 05:00:00	5854.4
2014-10-01 05:30:00	6110.45
2014-10-01 06:00:00	6314.1
2014-10-01 06:30:00	6807.53
2014-10-01 07:00:00	7203.11
2014-10-01 07:30:00	7347.55
2014-10-01 08:00:00	7529.76
2014-10-01 08:30:00	7683
2014-10-01 09:00:00	7694.43
2014-10-01 09:30:00	7813.99
2014-10-01 10:00:00	7817.48
2014-10-01 10:30:00	7824.9
2014-10-01 11:00:00	7825.66
2014-10-01 11:30:00	7741.16
2014-10-01 12:00:00	7747.75
2014-10-01 12:30:00	7728.41
2014-10-01 13:00:00	7712.25
2014-10-01 13:30:00	7686.42
2014-10-01 14:00:00	7682.68
2014-10-01 14:30:00	7722.31
2014-10-01 15:00:00	7760.88
2014-10-01 15:30:00	7730.18
2014-10-01 16:00:00	7736.53
2014-10-01 16:30:00	7796.55
2014-10-01 17:00:00	7928.36
2014-10-01 17:30:00	8021.38
2014-10-01 18:00:00	8242.78
2014-10-01 18:30:00	8529.91
2014-10-01 19:00:00	8710.65
2014-10-01 19:30:00	8476.26
2014-10-01 20:00:00	8253.56
2014-10-01 20:30:00	8134.94
2014-10-01 21:00:00	7946.6
2014-10-01 21:30:00	7792.17
2014-10-01 22:00:00	7621.39
2014-10-01 22:30:00	7709.78
2014-10-01 23:00:00	7517.73
2014-10-01 23:30:00	7514.2
2014-10-02	7496.71
2014-10-02 00:30:00	7344.75
2014-10-02 01:00:00	7174.57
2014-10-02 01:30:00	6974.2
2014-10-02 02:00:00	6759.34
2014-10-02 02:30:00	6426.88
2014-10-02 03:00:00	6174.01
2014-10-02 03:30:00	6038.27
2014-10-02 04:00:00	5930.69
2014-10-02 04:30:00	5953.11
2014-10-02 05:00:00	6081.1
2014-10-02 05:30:00	6359.1
2014-10-02 06:00:00	6596.42
2014-10-02 06:30:00	7111.8
2014-10-02 07:00:00	7503.59
2014-10-02 07:30:00	7558.38
2014-10-02 08:00:00	7808.04
2014-10-02 08:30:00	7929.19
2014-10-02 09:00:00	7902.66
2014-10-02 09:30:00	7907.3
2014-10-02 10:00:00	7937.02
2014-10-02 10:30:00	7899.17
2014-10-02 11:00:00	7864.9
2014-10-02 11:30:00	7760.86
2014-10-02 12:00:00	7696.84
2014-10-02 12:30:00	7692.97
2014-10-02 13:00:00	7657.13
2014-10-02 13:30:00	7646.43
2014-10-02 14:00:00	7639.52
2014-10-02 14:30:00	7644.13
2014-10-02 15:00:00	7691.1
2014-10-02 15:30:00	7700.45
2014-10-02 16:00:00	7718.99
2014-10-02 16:30:00	7861.9
2014-10-02 17:00:00	7959.98
2014-10-02 17:30:00	8105.45
2014-10-02 18:00:00	8314.09
2014-10-02 18:30:00	8501.44
2014-10-02 19:00:00	8719.77
2014-10-02 19:30:00	8535.55
2014-10-02 20:00:00	8325.73
2014-10-02 20:30:00	8179.06
2014-10-02 21:00:00	8034.97
2014-10-02 21:30:00	7886.51
2014-10-02 22:00:00	7675.78
2014-10-02 22:30:00	7781.44
2014-10-02 23:00:00	7586.65
2014-10-02 23:30:00	7592.87
2014-10-03	7574.18
2014-10-03 00:30:00	7368.32
2014-10-03 01:00:00	7196.93
2014-10-03 01:30:00	7028.46
2014-10-03 02:00:00	6793.37
2014-10-03 02:30:00	6517.31
2014-10-03 03:00:00	6257.32
2014-10-03 03:30:00	6126.95
2014-10-03 04:00:00	6079.72
2014-10-03 04:30:00	6029.41
2014-10-03 05:00:00	6128.72
2014-10-03 05:30:00	6352.3
2014-10-03 06:00:00	6612.08
2014-10-03 06:30:00	7061.26
2014-10-03 07:00:00	7396.93
2014-10-03 07:30:00	7453.13
2014-10-03 08:00:00	7723.23
2014-10-03 08:30:00	7846.51
2014-10-03 09:00:00	7857.16
2014-10-03 09:30:00	7987.9
2014-10-03 10:00:00	7968.47
2014-10-03 10:30:00	7977.37
2014-10-03 11:00:00	7998.37
2014-10-03 11:30:00	8013.4
2014-10-03 12:00:00	7962.33
2014-10-03 12:30:00	7868.92
2014-10-03 13:00:00	7826.5
2014-10-03 13:30:00	7772.29
2014-10-03 14:00:00	7791.46
2014-10-03 14:30:00	7747.68
2014-10-03 15:00:00	7716.26
2014-10-03 15:30:00	7768.23
2014-10-03 16:00:00	7750.97
2014-10-03 16:30:00	7838.79
2014-10-03 17:00:00	8005.84
2014-10-03 17:30:00	8022.94
2014-10-03 18:00:00	8115.57
2014-10-03 18:30:00	8243.23
2014-10-03 19:00:00	8382.94
2014-10-03 19:30:00	8192.35
2014-10-03 20:00:00	7983.42
2014-10-03 20:30:00	7877.47
2014-10-03 21:00:00	7711.54
2014-10-03 21:30:00	7557.74
2014-10-03 22:00:00	7474.56
2014-10-03 22:30:00	7596.38
2014-10-03 23:00:00	7450.56
2014-10-03 23:30:00	7502.73
2014-10-04	7544.63
2014-10-04 00:30:00	7324.22
2014-10-04 01:00:00	7164.33
2014-10-04 01:30:00	6923.66
2014-10-04 02:00:00	6696.65
2014-10-04 02:30:00	6415.34
2014-10-04 03:00:00	6134.86
2014-10-04 03:30:00	5952.04
2014-10-04 04:00:00	5863.34
2014-10-04 04:30:00	5793.62
2014-10-04 05:00:00	5798.37
2014-10-04 05:30:00	5899.58
2014-10-04 06:00:00	5929.87
2014-10-04 06:30:00	6089.74
2014-10-04 07:00:00	6251.05
2014-10-04 07:30:00	6400.58
2014-10-04 08:00:00	6655.48
2014-10-04 08:30:00	6867.06
2014-10-04 09:00:00	7070.33
2014-10-04 09:30:00	7270.06
2014-10-04 10:00:00	7240.81
2014-10-04 10:30:00	7225.2
2014-10-04 11:00:00	7075
2014-10-04 11:30:00	6998.07
2014-10-04 12:00:00	6972.43
2014-10-04 12:30:00	6924.15
2014-10-04 13:00:00	6806.73
2014-10-04 13:30:00	6804.33
2014-10-04 14:00:00	6845.56
2014-10-04 14:30:00	6777.27
2014-10-04 15:00:00	6834.06
2014-10-04 15:30:00	6880.9
2014-10-04 16:00:00	6964.14
2014-10-04 16:30:00	7067.07
2014-10-04 17:00:00	7169.66
2014-10-04 17:30:00	7217.39
2014-10-04 18:00:00	7416.64
2014-10-04 18:30:00	7705.15
2014-10-04 19:00:00	7858.37
2014-10-04 19:30:00	7690.2
2014-10-04 20:00:00	7531.37
2014-10-04 20:30:00	7401.51
2014-10-04 21:00:00	7271.42
2014-10-04 21:30:00	7100.56
2014-10-04 22:00:00	7006.47
2014-10-04 22:30:00	7058.2
2014-10-04 23:00:00	6940.18
2014-10-04 23:30:00	6916.75
2014-10-05	6855
2014-10-05 00:30:00	6636.99
2014-10-05 01:00:00	6465.49
2014-10-05 01:30:00	6296.87
2014-10-05 02:00:00	6089.48
2014-10-05 02:30:00	5849.09
2014-10-05 03:00:00	5709.37
2014-10-05 03:30:00	5626.23
2014-10-05 04:00:00	5564.74
2014-10-05 04:30:00	5608.3
2014-10-05 05:00:00	5672.73
2014-10-05 05:30:00	5740.48
2014-10-05 06:00:00	5762.43
2014-10-05 06:30:00	5939.74
2014-10-05 07:00:00	6099.05
2014-10-05 07:30:00	6253.59
2014-10-05 08:00:00	6467.95
2014-10-05 08:30:00	6679.03
2014-10-05 09:00:00	6746.44
2014-10-05 09:30:00	6783.07
2014-10-05 10:00:00	6788.89
2014-10-05 10:30:00	6744.01
2014-10-05 11:00:00	6768.12
2014-10-05 11:30:00	6758.68
2014-10-05 12:00:00	6750.79
2014-10-05 12:30:00	6736.64
2014-10-05 13:00:00	6760.83
2014-10-05 13:30:00	6743.82
2014-10-05 14:00:00	6802.62
2014-10-05 14:30:00	6996.9
2014-10-05 15:00:00	7049.75
2014-10-05 15:30:00	7232.01
2014-10-05 16:00:00	7389.68
2014-10-05 16:30:00	7423.91
2014-10-05 17:00:00	7533.89
2014-10-05 17:30:00	7612.48
2014-10-05 18:00:00	7690.23
2014-10-05 18:30:00	7794.43
2014-10-05 19:00:00	7751.7
2014-10-05 19:30:00	7536.79
2014-10-05 20:00:00	7388
2014-10-05 20:30:00	7145.27
2014-10-05 21:00:00	6954.77
2014-10-05 21:30:00	6931.12
2014-10-05 22:00:00	6890.87
2014-10-05 22:30:00	6910.53
2014-10-05 23:00:00	6693.27
2014-10-05 23:30:00	6497.14
2014-10-06	6404.81
2014-10-06 00:30:00	6263.68
2014-10-06 01:00:00	6108.56
2014-10-06 01:30:00	5902.72
2014-10-06 02:00:00	5703.99
2014-10-06 02:30:00	5591.18
2014-10-06 03:00:00	5515.29
2014-10-06 03:30:00	5489.52
2014-10-06 04:00:00	5498.49
2014-10-06 04:30:00	5546.48
2014-10-06 05:00:00	5652.81
2014-10-06 05:30:00	5760
2014-10-06 06:00:00	5886.65
2014-10-06 06:30:00	6039.54
2014-10-06 07:00:00	6193.96
2014-10-06 07:30:00	6370.85
2014-10-06 08:00:00	6568.67
2014-10-06 08:30:00	6801.44
2014-10-06 09:00:00	6924.33
2014-10-06 09:30:00	7042.05
2014-10-06 10:00:00	7123.66
2014-10-06 10:30:00	7124.91
2014-10-06 11:00:00	7087.41
2014-10-06 11:30:00	7041.61
2014-10-06 12:00:00	7062.01
2014-10-06 12:30:00	6998.16
2014-10-06 13:00:00	7039.77
2014-10-06 13:30:00	7024.32
2014-10-06 14:00:00	7120.98
2014-10-06 14:30:00	7184.57
2014-10-06 15:00:00	7254.09
2014-10-06 15:30:00	7394.13
2014-10-06 16:00:00	7587.1
2014-10-06 16:30:00	7665.21
2014-10-06 17:00:00	7868.96
2014-10-06 17:30:00	7842.77
2014-10-06 18:00:00	7863.32
2014-10-06 18:30:00	8001.54
2014-10-06 19:00:00	7970.7
2014-10-06 19:30:00	7801.44
2014-10-06 20:00:00	7592.73
2014-10-06 20:30:00	7407.21
2014-10-06 21:00:00	7169.29
2014-10-06 21:30:00	7079.94
2014-10-06 22:00:00	6984.91
2014-10-06 22:30:00	7009.78
2014-10-06 23:00:00	6918.38
2014-10-06 23:30:00	6804.7
2014-10-07	6774.53
2014-10-07 00:30:00	6631.16
2014-10-07 01:00:00	6515.63
2014-10-07 01:30:00	6185.96
2014-10-07 02:00:00	5968.89
2014-10-07 02:30:00	5840.32
2014-10-07 03:00:00	5788.26
2014-10-07 03:30:00	5754.97
2014-10-07 04:00:00	5854.74
2014-10-07 04:30:00	6009.65
2014-10-07 05:00:00	6249.85
2014-10-07 05:30:00	6772.78
2014-10-07 06:00:00	7312.45
2014-10-07 06:30:00	7764.24
2014-10-07 07:00:00	8115.12
2014-10-07 07:30:00	8228.28
2014-10-07 08:00:00	8259.31
2014-10-07 08:30:00	8188.3
2014-10-07 09:00:00	8164.2
2014-10-07 09:30:00	8193.26
2014-10-07 10:00:00	8220.83
2014-10-07 10:30:00	8191.62
2014-10-07 11:00:00	8210.35
2014-10-07 11:30:00	8187.33
2014-10-07 12:00:00	8143.99
2014-10-07 12:30:00	8170.3
2014-10-07 13:00:00	8159.96
2014-10-07 13:30:00	8156.01
2014-10-07 14:00:00	8174.38
2014-10-07 14:30:00	8174.91
2014-10-07 15:00:00	8237.51
2014-10-07 15:30:00	8313.64
2014-10-07 16:00:00	8384.84
2014-10-07 16:30:00	8442.41
2014-10-07 17:00:00	8453.19
2014-10-07 17:30:00	8360.67
2014-10-07 18:00:00	8387.93
2014-10-07 18:30:00	8440.73
2014-10-07 19:00:00	8546.08
2014-10-07 19:30:00	8383.02
2014-10-07 20:00:00	8211.02
2014-10-07 20:30:00	8002.57
2014-10-07 21:00:00	7728.69
2014-10-07 21:30:00	7649.81
2014-10-07 22:00:00	7456.44
2014-10-07 22:30:00	7465.68
2014-10-07 23:00:00	7365.93
2014-10-07 23:30:00	7292.84
2014-10-08	7152.19
2014-10-08 00:30:00	7031.78
2014-10-08 01:00:00	6853.15
2014-10-08 01:30:00	6538.69
2014-10-08 02:00:00	6277.61
2014-10-08 02:30:00	6141.89
2014-10-08 03:00:00	6048.85
2014-10-08 03:30:00	6024.82
2014-10-08 04:00:00	6093.87
2014-10-08 04:30:00	6271.24
2014-10-08 05:00:00	6513.67
2014-10-08 05:30:00	7070.82
2014-10-08 06:00:00	7564.44
2014-10-08 06:30:00	7948.02
2014-10-08 07:00:00	8236.92
2014-10-08 07:30:00	8162.71
2014-10-08 08:00:00	8148.69
2014-10-08 08:30:00	8204.16
2014-10-08 09:00:00	8195.09
2014-10-08 09:30:00	8242.05
2014-10-08 10:00:00	8216.44
2014-10-08 10:30:00	8147.34
2014-10-08 11:00:00	8075.4
2014-10-08 11:30:00	7955.55
2014-10-08 12:00:00	7944.18
2014-10-08 12:30:00	7897.97
2014-10-08 13:00:00	7857.74
2014-10-08 13:30:00	7836.74
2014-10-08 14:00:00	7791.73
2014-10-08 14:30:00	7770.79
2014-10-08 15:00:00	7822.19
2014-10-08 15:30:00	7866.53
2014-10-08 16:00:00	7937.81
2014-10-08 16:30:00	7944.55
2014-10-08 17:00:00	8066.4
2014-10-08 17:30:00	8053.95
2014-10-08 18:00:00	8191.53
2014-10-08 18:30:00	8284.07
2014-10-08 19:00:00	8344.42
2014-10-08 19:30:00	8128.7
2014-10-08 20:00:00	7935.68
2014-10-08 20:30:00	7756.65
2014-10-08 21:00:00	7496.99
2014-10-08 21:30:00	7521.92
2014-10-08 22:00:00	7333.2
2014-10-08 22:30:00	7349.55
2014-10-08 23:00:00	7319.18
2014-10-08 23:30:00	7235.67
2014-10-09	7194.41
2014-10-09 00:30:00	7041.76
2014-10-09 01:00:00	6826.31
2014-10-09 01:30:00	6565.55
2014-10-09 02:00:00	6322.93
2014-10-09 02:30:00	6167.87
2014-10-09 03:00:00	6022.77
2014-10-09 03:30:00	6026.03
2014-10-09 04:00:00	6082.39
2014-10-09 04:30:00	6267.88
2014-10-09 05:00:00	6556.98
2014-10-09 05:30:00	7082.63
2014-10-09 06:00:00	7508.94
2014-10-09 06:30:00	7893.13
2014-10-09 07:00:00	8167.79
2014-10-09 07:30:00	8143.37
2014-10-09 08:00:00	8082.04
2014-10-09 08:30:00	8098.69
2014-10-09 09:00:00	8058.35
2014-10-09 09:30:00	8107.99
2014-10-09 10:00:00	8123.91
2014-10-09 10:30:00	8073.43
2014-10-09 11:00:00	8060.6
2014-10-09 11:30:00	7895.01
2014-10-09 12:00:00	7863.08
2014-10-09 12:30:00	7813.37
2014-10-09 13:00:00	7847.95
2014-10-09 13:30:00	7853.26
2014-10-09 14:00:00	7841.08
2014-10-09 14:30:00	7859.17
2014-10-09 15:00:00	7881.46
2014-10-09 15:30:00	7961.43
2014-10-09 16:00:00	8011.59
2014-10-09 16:30:00	8065.35
2014-10-09 17:00:00	8182.05
2014-10-09 17:30:00	8185.73
2014-10-09 18:00:00	8238.87
2014-10-09 18:30:00	8358.43
2014-10-09 19:00:00	8475.11
2014-10-09 19:30:00	8302.14
2014-10-09 20:00:00	8113.88
2014-10-09 20:30:00	7955.03
2014-10-09 21:00:00	7584.3
2014-10-09 21:30:00	7570.04
2014-10-09 22:00:00	7502.75
2014-10-09 22:30:00	7499.98
2014-10-09 23:00:00	7422.83
2014-10-09 23:30:00	7242.39
2014-10-10	7118.94
2014-10-10 00:30:00	7023.14
2014-10-10 01:00:00	6810.32
2014-10-10 01:30:00	6542.77
2014-10-10 02:00:00	6282.4
2014-10-10 02:30:00	6074.12
2014-10-10 03:00:00	5973.54
2014-10-10 03:30:00	5975.38
2014-10-10 04:00:00	6026.62
2014-10-10 04:30:00	6233.29
2014-10-10 05:00:00	6547.27
2014-10-10 05:30:00	7086.12
2014-10-10 06:00:00	7549.11
2014-10-10 06:30:00	7930.01
2014-10-10 07:00:00	8176.85
2014-10-10 07:30:00	8101.57
2014-10-10 08:00:00	8052.7
2014-10-10 08:30:00	8068.72
2014-10-10 09:00:00	8100.99
2014-10-10 09:30:00	8150.64
2014-10-10 10:00:00	8173.56
2014-10-10 10:30:00	8150.84
2014-10-10 11:00:00	8129.62
2014-10-10 11:30:00	8115.36
2014-10-10 12:00:00	8126.8
2014-10-10 12:30:00	8039.81
2014-10-10 13:00:00	8003.41
2014-10-10 13:30:00	7996.37
2014-10-10 14:00:00	8003.59
2014-10-10 14:30:00	7941.39
2014-10-10 15:00:00	8004.04
2014-10-10 15:30:00	7992.87
2014-10-10 16:00:00	7992.21
2014-10-10 16:30:00	8003.76
2014-10-10 17:00:00	8009.29
2014-10-10 17:30:00	7891.44
2014-10-10 18:00:00	8015.72
2014-10-10 18:30:00	8043.14
2014-10-10 19:00:00	8096.94
2014-10-10 19:30:00	7945.94
2014-10-10 20:00:00	7758.82
2014-10-10 20:30:00	7639.79
2014-10-10 21:00:00	7439.36
2014-10-10 21:30:00	7478.04
2014-10-10 22:00:00	7327.89
2014-10-10 22:30:00	7423.56
2014-10-10 23:00:00	7315.59
2014-10-10 23:30:00	7235.72
2014-10-11	7071.04
2014-10-11 00:30:00	6939.29
2014-10-11 01:00:00	6667.66
2014-10-11 01:30:00	6442.19
2014-10-11 02:00:00	6158.41
2014-10-11 02:30:00	5971.53
2014-10-11 03:00:00	5838.93
2014-10-11 03:30:00	5727.91
2014-10-11 04:00:00	5783.79
2014-10-11 04:30:00	5841.57
2014-10-11 05:00:00	5908.75
2014-10-11 05:30:00	6099.68
2014-10-11 06:00:00	6295.81
2014-10-11 06:30:00	6555.86
2014-10-11 07:00:00	6824.17
2014-10-11 07:30:00	7032.56
2014-10-11 08:00:00	7239.74
2014-10-11 08:30:00	7433.59
2014-10-11 09:00:00	7413.22
2014-10-11 09:30:00	7368.06
2014-10-11 10:00:00	7299.43
2014-10-11 10:30:00	7288.67
2014-10-11 11:00:00	7193.71
2014-10-11 11:30:00	7214.31
2014-10-11 12:00:00	7194.21
2014-10-11 12:30:00	7151.19
2014-10-11 13:00:00	7191.89
2014-10-11 13:30:00	7157.74
2014-10-11 14:00:00	7198.99
2014-10-11 14:30:00	7238.06
2014-10-11 15:00:00	7346.92
2014-10-11 15:30:00	7440.53
2014-10-11 16:00:00	7459.71
2014-10-11 16:30:00	7500.8
2014-10-11 17:00:00	7609.99
2014-10-11 17:30:00	7585.56
2014-10-11 18:00:00	7585.69
2014-10-11 18:30:00	7665.09
2014-10-11 19:00:00	7752.19
2014-10-11 19:30:00	7602.68
2014-10-11 20:00:00	7442.13
2014-10-11 20:30:00	7257.02
2014-10-11 21:00:00	7113.51
2014-10-11 21:30:00	7061.5
2014-10-11 22:00:00	6996.38
2014-10-11 22:30:00	7068.04
2014-10-11 23:00:00	6891.41
2014-10-11 23:30:00	6674.47
2014-10-12	6543.52
2014-10-12 00:30:00	6403.66
2014-10-12 01:00:00	6213.55
2014-10-12 01:30:00	6017.11
2014-10-12 02:00:00	5821.62
2014-10-12 02:30:00	5633.75
2014-10-12 03:00:00	5585.22
2014-10-12 03:30:00	5514.73
2014-10-12 04:00:00	5532.27
2014-10-12 04:30:00	5567.65
2014-10-12 05:00:00	5604.87
2014-10-12 05:30:00	5685.79
2014-10-12 06:00:00	5810.27
2014-10-12 06:30:00	6025.92
2014-10-12 07:00:00	6256.24
2014-10-12 07:30:00	6495.69
2014-10-12 08:00:00	6716.14
2014-10-12 08:30:00	6884.51
2014-10-12 09:00:00	6979.36
2014-10-12 09:30:00	7085.38
2014-10-12 10:00:00	7013.93
2014-10-12 10:30:00	7038.63
2014-10-12 11:00:00	6981.69
2014-10-12 11:30:00	6987.01
2014-10-12 12:00:00	6983.96
2014-10-12 12:30:00	7000.69
2014-10-12 13:00:00	7032.46
2014-10-12 13:30:00	7044.32
2014-10-12 14:00:00	7095.74
2014-10-12 14:30:00	7220.74
2014-10-12 15:00:00	7254.6
2014-10-12 15:30:00	7385.08
2014-10-12 16:00:00	7524.34
2014-10-12 16:30:00	7540.67
2014-10-12 17:00:00	7626.77
2014-10-12 17:30:00	7648.59
2014-10-12 18:00:00	7617.52
2014-10-12 18:30:00	7760.36
2014-10-12 19:00:00	7815.41
2014-10-12 19:30:00	7633.52
2014-10-12 20:00:00	7443.64
2014-10-12 20:30:00	7346.76
2014-10-12 21:00:00	7102.79
2014-10-12 21:30:00	6954.4
2014-10-12 22:00:00	6770.61
2014-10-12 22:30:00	6842.03
2014-10-12 23:00:00	6697.58
2014-10-12 23:30:00	6474.7
2014-10-13	6402.62
2014-10-13 00:30:00	6281.23
2014-10-13 01:00:00	6159.64
2014-10-13 01:30:00	5949.33
2014-10-13 02:00:00	5789.36
2014-10-13 02:30:00	5715.54
2014-10-13 03:00:00	5595.83
2014-10-13 03:30:00	5603.95
2014-10-13 04:00:00	5694.01
2014-10-13 04:30:00	6009.99
2014-10-13 05:00:00	6287.48
2014-10-13 05:30:00	6823.66
2014-10-13 06:00:00	7296.85
2014-10-13 06:30:00	7658.53
2014-10-13 07:00:00	7939.74
2014-10-13 07:30:00	8051.36
2014-10-13 08:00:00	8032.09
2014-10-13 08:30:00	8205.08
2014-10-13 09:00:00	8229.77
2014-10-13 09:30:00	8356.17
2014-10-13 10:00:00	8435.87
2014-10-13 10:30:00	8437.51
2014-10-13 11:00:00	8493.92
2014-10-13 11:30:00	8419.94
2014-10-13 12:00:00	8320.98
2014-10-13 12:30:00	8207.51
2014-10-13 13:00:00	8229.88
2014-10-13 13:30:00	8341.79
2014-10-13 14:00:00	8284.25
2014-10-13 14:30:00	8136.73
2014-10-13 15:00:00	8119.51
2014-10-13 15:30:00	8245.09
2014-10-13 16:00:00	8385.04
2014-10-13 16:30:00	8395.66
2014-10-13 17:00:00	8554.45
2014-10-13 17:30:00	8653.24
2014-10-13 18:00:00	8653.07
2014-10-13 18:30:00	8421.82
2014-10-13 19:00:00	8256.61
2014-10-13 19:30:00	8084.74
2014-10-13 20:00:00	7878.86
2014-10-13 20:30:00	7702.03
2014-10-13 21:00:00	7458.15
2014-10-13 21:30:00	7459.81
2014-10-13 22:00:00	7241.92
2014-10-13 22:30:00	7267.05
2014-10-13 23:00:00	7204.89
2014-10-13 23:30:00	7104.74
2014-10-14	7042.79
2014-10-14 00:30:00	6908.48
2014-10-14 01:00:00	6708.65
2014-10-14 01:30:00	6440.14
2014-10-14 02:00:00	6197.55
2014-10-14 02:30:00	5961.21
2014-10-14 03:00:00	5876.8
2014-10-14 03:30:00	5903.66
2014-10-14 04:00:00	5939.51
2014-10-14 04:30:00	6185.06
2014-10-14 05:00:00	6483.91
2014-10-14 05:30:00	7088.75
2014-10-14 06:00:00	7546.57
2014-10-14 06:30:00	7965.78
2014-10-14 07:00:00	8169.78
2014-10-14 07:30:00	8276.37
2014-10-14 08:00:00	8199.62
2014-10-14 08:30:00	8230.47
2014-10-14 09:00:00	8215.4
2014-10-14 09:30:00	8277.76
2014-10-14 10:00:00	8260.95
2014-10-14 10:30:00	8291.19
2014-10-14 11:00:00	8365.33
2014-10-14 11:30:00	8231.75
2014-10-14 12:00:00	8245.75
2014-10-14 12:30:00	8244.13
2014-10-14 13:00:00	8198.98
2014-10-14 13:30:00	8144.65
2014-10-14 14:00:00	8084.99
2014-10-14 14:30:00	8037.58
2014-10-14 15:00:00	8082.39
2014-10-14 15:30:00	8144.39
2014-10-14 16:00:00	8237.9
2014-10-14 16:30:00	8401.94
2014-10-14 17:00:00	8521.12
2014-10-14 17:30:00	8618.78
2014-10-14 18:00:00	8743.13
2014-10-14 18:30:00	8786.44
2014-10-14 19:00:00	8744.86
2014-10-14 19:30:00	8622.41
2014-10-14 20:00:00	8375.3
2014-10-14 20:30:00	8215.87
2014-10-14 21:00:00	7913.16
2014-10-14 21:30:00	7836.39
2014-10-14 22:00:00	7644.39
2014-10-14 22:30:00	7650.48
2014-10-14 23:00:00	7552.73
2014-10-14 23:30:00	7390.59
2014-10-15	7342.03
2014-10-15 00:30:00	7200.45
2014-10-15 01:00:00	6998.61
2014-10-15 01:30:00	6725.1
2014-10-15 02:00:00	6396.24
2014-10-15 02:30:00	6189.62
2014-10-15 03:00:00	6061.69
2014-10-15 03:30:00	6034.37
2014-10-15 04:00:00	6083.69
2014-10-15 04:30:00	6296.88
2014-10-15 05:00:00	6602.35
2014-10-15 05:30:00	7252.31
2014-10-15 06:00:00	7785.71
2014-10-15 06:30:00	8259.13
2014-10-15 07:00:00	8685.28
2014-10-15 07:30:00	8762.78
2014-10-15 08:00:00	8752.33
2014-10-15 08:30:00	8755.81
2014-10-15 09:00:00	8734.63
2014-10-15 09:30:00	8788.69
2014-10-15 10:00:00	8844.75
2014-10-15 10:30:00	8713.2
2014-10-15 11:00:00	8670.62
2014-10-15 11:30:00	8528.25
2014-10-15 12:00:00	8387.84
2014-10-15 12:30:00	8364.69
2014-10-15 13:00:00	8299.89
2014-10-15 13:30:00	8186.92
2014-10-15 14:00:00	8130.59
2014-10-15 14:30:00	7987.9
2014-10-15 15:00:00	8049.91
2014-10-15 15:30:00	8176.35
2014-10-15 16:00:00	8312.17
2014-10-15 16:30:00	8401.54
2014-10-15 17:00:00	8513.93
2014-10-15 17:30:00	8513
2014-10-15 18:00:00	8645.63
2014-10-15 18:30:00	8711.05
2014-10-15 19:00:00	8919.31
2014-10-15 19:30:00	8856.51
2014-10-15 20:00:00	8689.72
2014-10-15 20:30:00	8451.1
2014-10-15 21:00:00	8215.18
2014-10-15 21:30:00	8100.43
2014-10-15 22:00:00	7927.56
2014-10-15 22:30:00	7871.81
2014-10-15 23:00:00	7759.06
2014-10-15 23:30:00	7608.05
2014-10-16	7520.99
2014-10-16 00:30:00	7396.94
2014-10-16 01:00:00	7193.31
2014-10-16 01:30:00	6870.84
2014-10-16 02:00:00	6576.38
2014-10-16 02:30:00	6361.79
2014-10-16 03:00:00	6238.51
2014-10-16 03:30:00	6217.71
2014-10-16 04:00:00	6275.93
2014-10-16 04:30:00	6502.62
2014-10-16 05:00:00	6878.27
2014-10-16 05:30:00	7496.2
2014-10-16 06:00:00	8183.58
2014-10-16 06:30:00	8505.26
2014-10-16 07:00:00	8783.95
2014-10-16 07:30:00	8668.16
2014-10-16 08:00:00	8469.13
2014-10-16 08:30:00	8430.46
2014-10-16 09:00:00	8280.1
2014-10-16 09:30:00	8200.45
2014-10-16 10:00:00	8100.49
2014-10-16 10:30:00	8041.24
2014-10-16 11:00:00	7897.58
2014-10-16 11:30:00	7762.74
2014-10-16 12:00:00	7729.02
2014-10-16 12:30:00	7717.41
2014-10-16 13:00:00	7674.99
2014-10-16 13:30:00	7659.25
2014-10-16 14:00:00	7625.53
2014-10-16 14:30:00	7623.28
2014-10-16 15:00:00	7673.3
2014-10-16 15:30:00	7750.93
2014-10-16 16:00:00	7850.02
2014-10-16 16:30:00	7895.07
2014-10-16 17:00:00	8044.89
2014-10-16 17:30:00	8081.67
2014-10-16 18:00:00	8227.42
2014-10-16 18:30:00	8377.07
2014-10-16 19:00:00	8524.25
2014-10-16 19:30:00	8480.78
2014-10-16 20:00:00	8291.58
2014-10-16 20:30:00	8076.72
2014-10-16 21:00:00	7794.54
2014-10-16 21:30:00	7744.38
2014-10-16 22:00:00	7545.64
2014-10-16 22:30:00	7588.29
2014-10-16 23:00:00	7479.81
2014-10-16 23:30:00	7375.53
2014-10-17	7274.02
2014-10-17 00:30:00	7175.41
2014-10-17 01:00:00	6998.62
2014-10-17 01:30:00	6747.59
2014-10-17 02:00:00	6437.61
2014-10-17 02:30:00	6227.39
2014-10-17 03:00:00	6081.99
2014-10-17 03:30:00	6046.87
2014-10-17 04:00:00	6089.2
2014-10-17 04:30:00	6312.5
2014-10-17 05:00:00	6649.82
2014-10-17 05:30:00	7226.67
2014-10-17 06:00:00	7797.27
2014-10-17 06:30:00	8178.67
2014-10-17 07:00:00	8400.27
2014-10-17 07:30:00	8421.5
2014-10-17 08:00:00	8384.7
2014-10-17 08:30:00	8248.21
2014-10-17 09:00:00	8204.95
2014-10-17 09:30:00	8175.9
2014-10-17 10:00:00	8145.69
2014-10-17 10:30:00	8075.17
2014-10-17 11:00:00	8059.03
2014-10-17 11:30:00	8000.65
2014-10-17 12:00:00	7925.08
2014-10-17 12:30:00	7900.27
2014-10-17 13:00:00	7833.24
2014-10-17 13:30:00	7731.58
2014-10-17 14:00:00	7639.94
2014-10-17 14:30:00	7605.67
2014-10-17 15:00:00	7659.83
2014-10-17 15:30:00	7679.45
2014-10-17 16:00:00	7781.58
2014-10-17 16:30:00	7840.05
2014-10-17 17:00:00	7884.58
2014-10-17 17:30:00	7849.52
2014-10-17 18:00:00	7893.87
2014-10-17 18:30:00	8006.61
2014-10-17 19:00:00	8101.57
2014-10-17 19:30:00	7981.94
2014-10-17 20:00:00	7835.07
2014-10-17 20:30:00	7669.39
2014-10-17 21:00:00	7503.22
2014-10-17 21:30:00	7518.1
2014-10-17 22:00:00	7349.43
2014-10-17 22:30:00	7408.04
2014-10-17 23:00:00	7390.07
2014-10-17 23:30:00	7274.59
2014-10-18	7189.08
2014-10-18 00:30:00	7000.13
2014-10-18 01:00:00	6782.74
2014-10-18 01:30:00	6488.42
2014-10-18 02:00:00	6195.71
2014-10-18 02:30:00	5968.45
2014-10-18 03:00:00	5843.47
2014-10-18 03:30:00	5781.53
2014-10-18 04:00:00	5788.81
2014-10-18 04:30:00	5877.04
2014-10-18 05:00:00	5948.45
2014-10-18 05:30:00	6138.93
2014-10-18 06:00:00	6365.12
2014-10-18 06:30:00	6615.31
2014-10-18 07:00:00	6901.13
2014-10-18 07:30:00	7196.55
2014-10-18 08:00:00	7376.02
2014-10-18 08:30:00	7490.63
2014-10-18 09:00:00	7434.32
2014-10-18 09:30:00	7392.97
2014-10-18 10:00:00	7272.53
2014-10-18 10:30:00	7187.29
2014-10-18 11:00:00	7126.07
2014-10-18 11:30:00	7002.49
2014-10-18 12:00:00	6886.7
2014-10-18 12:30:00	6801.74
2014-10-18 13:00:00	6741.76
2014-10-18 13:30:00	6669.8
2014-10-18 14:00:00	6643.77
2014-10-18 14:30:00	6644.49
2014-10-18 15:00:00	6738.71
2014-10-18 15:30:00	6767.8
2014-10-18 16:00:00	6913.72
2014-10-18 16:30:00	6945.23
2014-10-18 17:00:00	7041.9
2014-10-18 17:30:00	7160.32
2014-10-18 18:00:00	7232.47
2014-10-18 18:30:00	7366.97
2014-10-18 19:00:00	7530.75
2014-10-18 19:30:00	7422.03
2014-10-18 20:00:00	7363.13
2014-10-18 20:30:00	7225.35
2014-10-18 21:00:00	7133.78
2014-10-18 21:30:00	7094.76
2014-10-18 22:00:00	7007.53
2014-10-18 22:30:00	7032.08
2014-10-18 23:00:00	6901.92
2014-10-18 23:30:00	6738.78
2014-10-19	6622.23
2014-10-19 00:30:00	6479.93
2014-10-19 01:00:00	6286.53
2014-10-19 01:30:00	5996.8
2014-10-19 02:00:00	5812.15
2014-10-19 02:30:00	5684.38
2014-10-19 03:00:00	5566.47
2014-10-19 03:30:00	5526.69
2014-10-19 04:00:00	5519.71
2014-10-19 04:30:00	5585.02
2014-10-19 05:00:00	5639.93
2014-10-19 05:30:00	5745.87
2014-10-19 06:00:00	5872.61
2014-10-19 06:30:00	6114.51
2014-10-19 07:00:00	6412.88
2014-10-19 07:30:00	6642.02
2014-10-19 08:00:00	6827.31
2014-10-19 08:30:00	6945.9
2014-10-19 09:00:00	6972.95
2014-10-19 09:30:00	7006.39
2014-10-19 10:00:00	6867.74
2014-10-19 10:30:00	6898.91
2014-10-19 11:00:00	6779.45
2014-10-19 11:30:00	6772.79
2014-10-19 12:00:00	6770.49
2014-10-19 12:30:00	6691.38
2014-10-19 13:00:00	6693.85
2014-10-19 13:30:00	6674.99
2014-10-19 14:00:00	6743.35
2014-10-19 14:30:00	6772.39
2014-10-19 15:00:00	6871.59
2014-10-19 15:30:00	6987
2014-10-19 16:00:00	7082.79
2014-10-19 16:30:00	7175.81
2014-10-19 17:00:00	7376.77
2014-10-19 17:30:00	7438.15
2014-10-19 18:00:00	7497.94
2014-10-19 18:30:00	7588.08
2014-10-19 19:00:00	7747.09
2014-10-19 19:30:00	7643.08
2014-10-19 20:00:00	7471.14
2014-10-19 20:30:00	7318.79
2014-10-19 21:00:00	7097.12
2014-10-19 21:30:00	6974.63
2014-10-19 22:00:00	6840.49
2014-10-19 22:30:00	6802.98
2014-10-19 23:00:00	6639.15
2014-10-19 23:30:00	6507.22
2014-10-20	6400.66
2014-10-20 00:30:00	6282.89
2014-10-20 01:00:00	6184.86
2014-10-20 01:30:00	5916.02
2014-10-20 02:00:00	5827.2
2014-10-20 02:30:00	5673.36
2014-10-20 03:00:00	5657.09
2014-10-20 03:30:00	5673.29
2014-10-20 04:00:00	5770
2014-10-20 04:30:00	5949.38
2014-10-20 05:00:00	6201.05
2014-10-20 05:30:00	6701.91
2014-10-20 06:00:00	7233.21
2014-10-20 06:30:00	7568.64
2014-10-20 07:00:00	7878.41
2014-10-20 07:30:00	7909.47
2014-10-20 08:00:00	7863.58
2014-10-20 08:30:00	7982.77
2014-10-20 09:00:00	7962.41
2014-10-20 09:30:00	8079.24
2014-10-20 10:00:00	8078.08
2014-10-20 10:30:00	8027.45
2014-10-20 11:00:00	8024.4
2014-10-20 11:30:00	7962.09
2014-10-20 12:00:00	7966.9
2014-10-20 12:30:00	7984.5
2014-10-20 13:00:00	7994.47
2014-10-20 13:30:00	7979.42
2014-10-20 14:00:00	7962.66
2014-10-20 14:30:00	7896.89
2014-10-20 15:00:00	8019.5
2014-10-20 15:30:00	8090.91
2014-10-20 16:00:00	8247.06
2014-10-20 16:30:00	8342.88
2014-10-20 17:00:00	8521.12
2014-10-20 17:30:00	8524.29
2014-10-20 18:00:00	8543.82
2014-10-20 18:30:00	8427.65
2014-10-20 19:00:00	8397.08
2014-10-20 19:30:00	8268.89
2014-10-20 20:00:00	8007.5
2014-10-20 20:30:00	7774.93
2014-10-20 21:00:00	7540.81
2014-10-20 21:30:00	7471.92
2014-10-20 22:00:00	7326.05
2014-10-20 22:30:00	7303.04
2014-10-20 23:00:00	7233.4
2014-10-20 23:30:00	7118.35
2014-10-21	7087.2
2014-10-21 00:30:00	6944.59
2014-10-21 01:00:00	6769.21
2014-10-21 01:30:00	6460.06
2014-10-21 02:00:00	6236
2014-10-21 02:30:00	5983.36
2014-10-21 03:00:00	5878.4
2014-10-21 03:30:00	5868.23
2014-10-21 04:00:00	5907.6
2014-10-21 04:30:00	6135.08
2014-10-21 05:00:00	6406.09
2014-10-21 05:30:00	6971.6
2014-10-21 06:00:00	7468.4
2014-10-21 06:30:00	7911.54
2014-10-21 07:00:00	8209.08
2014-10-21 07:30:00	8299.73
2014-10-21 08:00:00	8200.95
2014-10-21 08:30:00	8243.51
2014-10-21 09:00:00	8247.78
2014-10-21 09:30:00	8239.45
2014-10-21 10:00:00	8260.12
2014-10-21 10:30:00	8253.26
2014-10-21 11:00:00	8199.43
2014-10-21 11:30:00	8161.1
2014-10-21 12:00:00	8177.14
2014-10-21 12:30:00	8113.56
2014-10-21 13:00:00	8109.03
2014-10-21 13:30:00	8049.33
2014-10-21 14:00:00	7995.77
2014-10-21 14:30:00	7895.19
2014-10-21 15:00:00	7981.33
2014-10-21 15:30:00	8094.4
2014-10-21 16:00:00	8240.53
2014-10-21 16:30:00	8317.91
2014-10-21 17:00:00	8468.27
2014-10-21 17:30:00	8426.11
2014-10-21 18:00:00	8495.33
2014-10-21 18:30:00	8539.16
2014-10-21 19:00:00	8531.91
2014-10-21 19:30:00	8462.53
2014-10-21 20:00:00	8173.7
2014-10-21 20:30:00	8055.82
2014-10-21 21:00:00	7720.7
2014-10-21 21:30:00	7645.3
2014-10-21 22:00:00	7420.38
2014-10-21 22:30:00	7419.39
2014-10-21 23:00:00	7390.64
2014-10-21 23:30:00	7282.64
2014-10-22	7190.42
2014-10-22 00:30:00	7078.19
2014-10-22 01:00:00	6872.66
2014-10-22 01:30:00	6523.57
2014-10-22 02:00:00	6232.7
2014-10-22 02:30:00	5992.33
2014-10-22 03:00:00	5914.97
2014-10-22 03:30:00	5923.27
2014-10-22 04:00:00	5990.93
2014-10-22 04:30:00	6217.37
2014-10-22 05:00:00	6536.44
2014-10-22 05:30:00	7132.72
2014-10-22 06:00:00	7623.61
2014-10-22 06:30:00	7915.75
2014-10-22 07:00:00	8153.9
2014-10-22 07:30:00	8156.91
2014-10-22 08:00:00	8089.23
2014-10-22 08:30:00	8144.61
2014-10-22 09:00:00	8101.99
2014-10-22 09:30:00	8086.14
2014-10-22 10:00:00	8057.81
2014-10-22 10:30:00	8067.54
2014-10-22 11:00:00	7969.13
2014-10-22 11:30:00	7891.88
2014-10-22 12:00:00	7798.91
2014-10-22 12:30:00	7790.87
2014-10-22 13:00:00	7738.39
2014-10-22 13:30:00	7722.1
2014-10-22 14:00:00	7756.44
2014-10-22 14:30:00	7809.63
2014-10-22 15:00:00	7918.39
2014-10-22 15:30:00	8000.66
2014-10-22 16:00:00	8128.72
2014-10-22 16:30:00	8146.2
2014-10-22 17:00:00	8275.6
2014-10-22 17:30:00	8183.21
2014-10-22 18:00:00	8253.74
2014-10-22 18:30:00	8222.4
2014-10-22 19:00:00	8360.24
2014-10-22 19:30:00	8286.51
2014-10-22 20:00:00	8099.29
2014-10-22 20:30:00	7915.55
2014-10-22 21:00:00	7625.93
2014-10-22 21:30:00	7574.19
2014-10-22 22:00:00	7421.36
2014-10-22 22:30:00	7414.09
2014-10-22 23:00:00	7336.02
2014-10-22 23:30:00	7182.68
2014-10-23	7096.36
2014-10-23 00:30:00	6934.97
2014-10-23 01:00:00	6804.09
2014-10-23 01:30:00	6433.75
2014-10-23 02:00:00	6197.98
2014-10-23 02:30:00	5960.28
2014-10-23 03:00:00	5883.83
2014-10-23 03:30:00	5867.24
2014-10-23 04:00:00	5934.79
2014-10-23 04:30:00	6159.87
2014-10-23 05:00:00	6464.47
2014-10-23 05:30:00	7017.84
2014-10-23 06:00:00	7529.63
2014-10-23 06:30:00	7805.68
2014-10-23 07:00:00	8075.4
2014-10-23 07:30:00	8109.2
2014-10-23 08:00:00	8081.75
2014-10-23 08:30:00	8156.1
2014-10-23 09:00:00	8195.54
2014-10-23 09:30:00	8249.54
2014-10-23 10:00:00	8330.18
2014-10-23 10:30:00	8342.39
2014-10-23 11:00:00	8390.88
2014-10-23 11:30:00	8499.59
2014-10-23 12:00:00	8573.47
2014-10-23 12:30:00	8572.17
2014-10-23 13:00:00	8686.52
2014-10-23 13:30:00	8687.76
2014-10-23 14:00:00	8736.9
2014-10-23 14:30:00	8735.73
2014-10-23 15:00:00	8786.74
2014-10-23 15:30:00	8868.45
2014-10-23 16:00:00	8875.8
2014-10-23 16:30:00	8759.18
2014-10-23 17:00:00	8804.5
2014-10-23 17:30:00	8664.99
2014-10-23 18:00:00	8649.04
2014-10-23 18:30:00	8561.91
2014-10-23 19:00:00	8520.99
2014-10-23 19:30:00	8438.67
2014-10-23 20:00:00	8177.68
2014-10-23 20:30:00	7983.72
2014-10-23 21:00:00	7749.48
2014-10-23 21:30:00	7603.26
2014-10-23 22:00:00	7360.32
2014-10-23 22:30:00	7422.88
2014-10-23 23:00:00	7357
2014-10-23 23:30:00	7254.08
2014-10-24	7174.92
2014-10-24 00:30:00	7046.67
2014-10-24 01:00:00	6804.48
2014-10-24 01:30:00	6490.84
2014-10-24 02:00:00	6225.33
2014-10-24 02:30:00	6102.18
2014-10-24 03:00:00	5971.46
2014-10-24 03:30:00	5970.77
2014-10-24 04:00:00	5997.38
2014-10-24 04:30:00	6266.97
2014-10-24 05:00:00	6549.23
2014-10-24 05:30:00	7042.49
2014-10-24 06:00:00	7533.57
2014-10-24 06:30:00	7869.84
2014-10-24 07:00:00	8171.77
2014-10-24 07:30:00	8269.75
2014-10-24 08:00:00	8287.8
2014-10-24 08:30:00	8441.15
2014-10-24 09:00:00	8606.81
2014-10-24 09:30:00	8664.3
2014-10-24 10:00:00	8543.53
2014-10-24 10:30:00	8485.72
2014-10-24 11:00:00	8609.95
2014-10-24 11:30:00	8550.99
2014-10-24 12:00:00	8570.98
2014-10-24 12:30:00	8590.61
2014-10-24 13:00:00	8615.23
2014-10-24 13:30:00	8678
2014-10-24 14:00:00	8679.78
2014-10-24 14:30:00	8784.41
2014-10-24 15:00:00	8820.31
2014-10-24 15:30:00	8959.76
2014-10-24 16:00:00	8959.01
2014-10-24 16:30:00	8955.69
2014-10-24 17:00:00	8811.35
2014-10-24 17:30:00	8562.98
2014-10-24 18:00:00	8520.1
2014-10-24 18:30:00	8435.23
2014-10-24 19:00:00	8504.77
2014-10-24 19:30:00	8338.16
2014-10-24 20:00:00	8256.99
2014-10-24 20:30:00	8003.22
2014-10-24 21:00:00	7732.77
2014-10-24 21:30:00	7694.32
2014-10-24 22:00:00	7554.62
2014-10-24 22:30:00	7580.72
2014-10-24 23:00:00	7461.96
2014-10-24 23:30:00	7300.06
2014-10-25	7137.15
2014-10-25 00:30:00	6912.07
2014-10-25 01:00:00	6687.03
2014-10-25 01:30:00	6434.7
2014-10-25 02:00:00	6157.59
2014-10-25 02:30:00	5980.76
2014-10-25 03:00:00	5821.35
2014-10-25 03:30:00	5803.31
2014-10-25 04:00:00	5826.03
2014-10-25 04:30:00	5871.99
2014-10-25 05:00:00	5956.15
2014-10-25 05:30:00	6098.07
2014-10-25 06:00:00	6222.54
2014-10-25 06:30:00	6549.29
2014-10-25 07:00:00	6836.82
2014-10-25 07:30:00	7108.18
2014-10-25 08:00:00	7359.83
2014-10-25 08:30:00	7624
2014-10-25 09:00:00	7660.03
2014-10-25 09:30:00	7756.39
2014-10-25 10:00:00	7728.53
2014-10-25 10:30:00	7778.3
2014-10-25 11:00:00	7805.8
2014-10-25 11:30:00	7796.98
2014-10-25 12:00:00	7840
2014-10-25 12:30:00	7887.14
2014-10-25 13:00:00	7889.4
2014-10-25 13:30:00	7903.18
2014-10-25 14:00:00	7953.99
2014-10-25 14:30:00	8020.9
2014-10-25 15:00:00	8009.89
2014-10-25 15:30:00	7949.91
2014-10-25 16:00:00	8054.19
2014-10-25 16:30:00	8007.54
2014-10-25 17:00:00	8049.51
2014-10-25 17:30:00	8013.84
2014-10-25 18:00:00	7982.64
2014-10-25 18:30:00	7992.86
2014-10-25 19:00:00	7934.73
2014-10-25 19:30:00	7811.97
2014-10-25 20:00:00	7650.55
2014-10-25 20:30:00	7484.95
2014-10-25 21:00:00	7294.3
2014-10-25 21:30:00	7242.71
2014-10-25 22:00:00	7117.48
2014-10-25 22:30:00	7114.85
2014-10-25 23:00:00	6944.79
2014-10-25 23:30:00	6693.24
2014-10-26	6637.43
2014-10-26 00:30:00	6464.58
2014-10-26 01:00:00	6294.18
2014-10-26 01:30:00	5989.78
2014-10-26 02:00:00	5808.79
2014-10-26 02:30:00	5711.36
2014-10-26 03:00:00	5609.68
2014-10-26 03:30:00	5581.38
2014-10-26 04:00:00	5605.15
2014-10-26 04:30:00	5656.2
2014-10-26 05:00:00	5713.61
2014-10-26 05:30:00	5748.83
2014-10-26 06:00:00	5877.7
2014-10-26 06:30:00	6104.59
2014-10-26 07:00:00	6359.41
2014-10-26 07:30:00	6665.72
2014-10-26 08:00:00	6922.75
2014-10-26 08:30:00	7140.7
2014-10-26 09:00:00	7248.73
2014-10-26 09:30:00	7337.42
2014-10-26 10:00:00	7433.69
2014-10-26 10:30:00	7481.3
2014-10-26 11:00:00	7592.94
2014-10-26 11:30:00	7600.15
2014-10-26 12:00:00	7622.46
2014-10-26 12:30:00	7713.77
2014-10-26 13:00:00	7797.59
2014-10-26 13:30:00	7923.17
2014-10-26 14:00:00	7972.06
2014-10-26 14:30:00	8009.15
2014-10-26 15:00:00	8051.09
2014-10-26 15:30:00	8086.42
2014-10-26 16:00:00	8109.26
2014-10-26 16:30:00	8115.82
2014-10-26 17:00:00	8099.49
2014-10-26 17:30:00	8028.96
2014-10-26 18:00:00	7957.82
2014-10-26 18:30:00	7953.93
2014-10-26 19:00:00	8015.64
2014-10-26 19:30:00	7948.16
2014-10-26 20:00:00	7777.89
2014-10-26 20:30:00	7549.41
2014-10-26 21:00:00	7362.29
2014-10-26 21:30:00	7233.01
2014-10-26 22:00:00	7001.67
2014-10-26 22:30:00	6930.36
2014-10-26 23:00:00	6853.29
2014-10-26 23:30:00	6716.71
2014-10-27	6576.36
2014-10-27 00:30:00	6426.68
2014-10-27 01:00:00	6301.81
2014-10-27 01:30:00	6039.53
2014-10-27 02:00:00	5900.77
2014-10-27 02:30:00	5803.56
2014-10-27 03:00:00	5777.23
2014-10-27 03:30:00	5765.49
2014-10-27 04:00:00	5829.82
2014-10-27 04:30:00	6053.41
2014-10-27 05:00:00	6329.59
2014-10-27 05:30:00	6808.01
2014-10-27 06:00:00	7319.98
2014-10-27 06:30:00	7678.9
2014-10-27 07:00:00	8030.85
2014-10-27 07:30:00	8260.81
2014-10-27 08:00:00	8370.75
2014-10-27 08:30:00	8532.29
2014-10-27 09:00:00	8636.23
2014-10-27 09:30:00	8732.29
2014-10-27 10:00:00	8776.95
2014-10-27 10:30:00	8730.19
2014-10-27 11:00:00	8736.12
2014-10-27 11:30:00	8767.85
2014-10-27 12:00:00	8951.21
2014-10-27 12:30:00	8958.19
2014-10-27 13:00:00	9128.03
2014-10-27 13:30:00	9175.22
2014-10-27 14:00:00	9072.38
2014-10-27 14:30:00	8938.21
2014-10-27 15:00:00	8974.87
2014-10-27 15:30:00	8998.47
2014-10-27 16:00:00	9017.98
2014-10-27 16:30:00	9159.52
2014-10-27 17:00:00	9138.87
2014-10-27 17:30:00	8958.51
2014-10-27 18:00:00	8834.83
2014-10-27 18:30:00	8679.88
2014-10-27 19:00:00	8695.46
2014-10-27 19:30:00	8535.59
2014-10-27 20:00:00	8254.63
2014-10-27 20:30:00	8009.94
2014-10-27 21:00:00	7712.04
2014-10-27 21:30:00	7602.23
2014-10-27 22:00:00	7340.75
2014-10-27 22:30:00	7349
2014-10-27 23:00:00	7215.3
2014-10-27 23:30:00	7000.23
2014-10-28	6944.31
2014-10-28 00:30:00	6734.31
2014-10-28 01:00:00	6543.68
2014-10-28 01:30:00	6251.98
2014-10-28 02:00:00	6017.87
2014-10-28 02:30:00	5824.47
2014-10-28 03:00:00	5807.61
2014-10-28 03:30:00	5797.9
2014-10-28 04:00:00	5852.63
2014-10-28 04:30:00	6026.27
2014-10-28 05:00:00	6284.76
2014-10-28 05:30:00	6762.64
2014-10-28 06:00:00	7269.76
2014-10-28 06:30:00	7587.64
2014-10-28 07:00:00	7848.57
2014-10-28 07:30:00	7929.54
2014-10-28 08:00:00	7940.07
2014-10-28 08:30:00	7990.1
2014-10-28 09:00:00	8018.57
2014-10-28 09:30:00	8106.02
2014-10-28 10:00:00	8093.1
2014-10-28 10:30:00	8085.77
2014-10-28 11:00:00	8071.96
2014-10-28 11:30:00	8010.21
2014-10-28 12:00:00	8053.95
2014-10-28 12:30:00	8076.56
2014-10-28 13:00:00	8032.91
2014-10-28 13:30:00	8080.87
2014-10-28 14:00:00	8105.56
2014-10-28 14:30:00	8151.43
2014-10-28 15:00:00	8303.71
2014-10-28 15:30:00	8367.19
2014-10-28 16:00:00	8388.27
2014-10-28 16:30:00	8460.69
2014-10-28 17:00:00	8518.35
2014-10-28 17:30:00	8350.95
2014-10-28 18:00:00	8274.74
2014-10-28 18:30:00	8202.65
2014-10-28 19:00:00	8272.32
2014-10-28 19:30:00	8203.67
2014-10-28 20:00:00	8059.16
2014-10-28 20:30:00	7827.55
2014-10-28 21:00:00	7514.97
2014-10-28 21:30:00	7439.9
2014-10-28 22:00:00	7311.02
2014-10-28 22:30:00	7336.86
2014-10-28 23:00:00	7182.43
2014-10-28 23:30:00	7049.34
2014-10-29	6925.01
2014-10-29 00:30:00	6721.39
2014-10-29 01:00:00	6541.02
2014-10-29 01:30:00	6270.08
2014-10-29 02:00:00	6002.98
2014-10-29 02:30:00	5854.8
2014-10-29 03:00:00	5815.43
2014-10-29 03:30:00	5814.44
2014-10-29 04:00:00	5915.88
2014-10-29 04:30:00	6100.21
2014-10-29 05:00:00	6382.82
2014-10-29 05:30:00	6845.32
2014-10-29 06:00:00	7358.52
2014-10-29 06:30:00	7629.86
2014-10-29 07:00:00	7899.24
2014-10-29 07:30:00	7948.02
2014-10-29 08:00:00	7957.01
2014-10-29 08:30:00	8043.17
2014-10-29 09:00:00	8097.13
2014-10-29 09:30:00	8102.98
2014-10-29 10:00:00	8137.12
2014-10-29 10:30:00	8117.5
2014-10-29 11:00:00	8092.11
2014-10-29 11:30:00	8110.99
2014-10-29 12:00:00	8110.33
2014-10-29 12:30:00	8135.52
2014-10-29 13:00:00	8104.47
2014-10-29 13:30:00	8184.59
2014-10-29 14:00:00	8208.9
2014-10-29 14:30:00	8205.73
2014-10-29 15:00:00	8244.7
2014-10-29 15:30:00	8275.49
2014-10-29 16:00:00	8378.73
2014-10-29 16:30:00	8372.49
2014-10-29 17:00:00	8398.96
2014-10-29 17:30:00	8232.78
2014-10-29 18:00:00	8218.03
2014-10-29 18:30:00	8154.13
2014-10-29 19:00:00	8217.54
2014-10-29 19:30:00	8208.01
2014-10-29 20:00:00	8034.69
2014-10-29 20:30:00	7830.18
2014-10-29 21:00:00	7583.54
2014-10-29 21:30:00	7554.8
2014-10-29 22:00:00	7334.25
2014-10-29 22:30:00	7321.35
2014-10-29 23:00:00	7250.84
2014-10-29 23:30:00	7135.91
2014-10-30	7018.73
2014-10-30 00:30:00	6873.97
2014-10-30 01:00:00	6691.04
2014-10-30 01:30:00	6360.26
2014-10-30 02:00:00	6106.15
2014-10-30 02:30:00	5967.37
2014-10-30 03:00:00	5881.64
2014-10-30 03:30:00	5851.58
2014-10-30 04:00:00	5909.21
2014-10-30 04:30:00	6098.43
2014-10-30 05:00:00	6381.15
2014-10-30 05:30:00	6886.4
2014-10-30 06:00:00	7366.15
2014-10-30 06:30:00	7665.39
2014-10-30 07:00:00	7996.82
2014-10-30 07:30:00	8057.16
2014-10-30 08:00:00	8110.07
2014-10-30 08:30:00	8174.44
2014-10-30 09:00:00	8265.33
2014-10-30 09:30:00	8326.8
2014-10-30 10:00:00	8302.65
2014-10-30 10:30:00	8238.18
2014-10-30 11:00:00	8429.23
2014-10-30 11:30:00	8469.82
2014-10-30 12:00:00	8512.1
2014-10-30 12:30:00	8517.78
2014-10-30 13:00:00	8613.27
2014-10-30 13:30:00	8614.28
2014-10-30 14:00:00	8657.8
2014-10-30 14:30:00	8711.64
2014-10-30 15:00:00	8890.62
2014-10-30 15:30:00	9020.4
2014-10-30 16:00:00	9091.6
2014-10-30 16:30:00	9159.95
2014-10-30 17:00:00	9184.29
2014-10-30 17:30:00	9043.39
2014-10-30 18:00:00	9038.47
2014-10-30 18:30:00	8844.45
2014-10-30 19:00:00	8896.71
2014-10-30 19:30:00	8809.19
2014-10-30 20:00:00	8621.96
2014-10-30 20:30:00	8263.58
2014-10-30 21:00:00	7986.82
2014-10-30 21:30:00	7900.4
2014-10-30 22:00:00	7710.48
2014-10-30 22:30:00	7694.11
2014-10-30 23:00:00	7529.12
2014-10-30 23:30:00	7333.95
2014-10-31	7198.2
2014-10-31 00:30:00	7015.59
2014-10-31 01:00:00	6796.78
2014-10-31 01:30:00	6463.83
2014-10-31 02:00:00	6212.19
2014-10-31 02:30:00	6050.95
2014-10-31 03:00:00	5990.26
2014-10-31 03:30:00	5969.53
2014-10-31 04:00:00	6035.86
2014-10-31 04:30:00	6303.06
2014-10-31 05:00:00	6579.6
2014-10-31 05:30:00	7002.09
2014-10-31 06:00:00	7497.07
2014-10-31 06:30:00	7859.22
2014-10-31 07:00:00	8089.89
2014-10-31 07:30:00	8229.65
2014-10-31 08:00:00	8253.9
2014-10-31 08:30:00	8410.31
2014-10-31 09:00:00	8557.18
2014-10-31 09:30:00	8645.8
2014-10-31 10:00:00	8682.08
2014-10-31 10:30:00	8831.44
2014-10-31 11:00:00	8880.13
2014-10-31 11:30:00	8924.76
2014-10-31 12:00:00	8994.48
2014-10-31 12:30:00	9076.15
2014-10-31 13:00:00	9308.3
2014-10-31 13:30:00	9366.23
2014-10-31 14:00:00	9525.88
2014-10-31 14:30:00	9592.2
2014-10-31 15:00:00	9692.34
2014-10-31 15:30:00	9841.34
2014-10-31 16:00:00	9930.88
2014-10-31 16:30:00	9781.9
2014-10-31 17:00:00	9605.94
2014-10-31 17:30:00	9192.18
2014-10-31 18:00:00	9049.34
2014-10-31 18:30:00	8865.22
2014-10-31 19:00:00	8919.61
2014-10-31 19:30:00	8812.18
2014-10-31 20:00:00	8597.29
2014-10-31 20:30:00	8347.56
2014-10-31 21:00:00	8136.1
2014-10-31 21:30:00	8017.78
2014-10-31 22:00:00	7877.89
2014-10-31 22:30:00	7852.79
2014-10-31 23:00:00	7656.35
2014-10-31 23:30:00	7469.77
2014-11-01	7292.66

## Sheet: QLD-Jan
SETTLEMENTDATE	TOTALDEMAND
2014-01-01 00:30:00	5515.63
2014-01-01 01:00:00	5376.3
2014-01-01 01:30:00	5214.38
2014-01-01 02:00:00	5149.08
2014-01-01 02:30:00	5051.84
2014-01-01 03:00:00	4998.26
2014-01-01 03:30:00	4954.62
2014-01-01 04:00:00	4930.19
2014-01-01 04:30:00	4933.35
2014-01-01 05:00:00	4924.31
2014-01-01 05:30:00	4876.17
2014-01-01 06:00:00	4863.19
2014-01-01 06:30:00	4930.26
2014-01-01 07:00:00	5003.89
2014-01-01 07:30:00	5171.49
2014-01-01 08:00:00	5251.87
2014-01-01 08:30:00	5319.53
2014-01-01 09:00:00	5437.67
2014-01-01 09:30:00	5474.16
2014-01-01 10:00:00	5514.12
2014-01-01 10:30:00	5535.89
2014-01-01 11:00:00	5571.47
2014-01-01 11:30:00	5605.24
2014-01-01 12:00:00	5667.79
2014-01-01 12:30:00	5704.61
2014-01-01 13:00:00	5766.22
2014-01-01 13:30:00	5831.48
2014-01-01 14:00:00	5889.61
2014-01-01 14:30:00	5973.96
2014-01-01 15:00:00	6026.49
2014-01-01 15:30:00	6121.2
2014-01-01 16:00:00	6177.79
2014-01-01 16:30:00	6294.69
2014-01-01 17:00:00	6446.81
2014-01-01 17:30:00	6477.66
2014-01-01 18:00:00	6495.08
2014-01-01 18:30:00	6405.75
2014-01-01 19:00:00	6389.23
2014-01-01 19:30:00	6472.05
2014-01-01 20:00:00	6447.09
2014-01-01 20:30:00	6324.34
2014-01-01 21:00:00	6238
2014-01-01 21:30:00	6263.67
2014-01-01 22:00:00	6154.7
2014-01-01 22:30:00	5971.61
2014-01-01 23:00:00	5826.66
2014-01-01 23:30:00	5687.62
2014-01-02	5478.36
2014-01-02 00:30:00	5304.76
2014-01-02 01:00:00	5138.8
2014-01-02 01:30:00	4993.74
2014-01-02 02:00:00	4917.98
2014-01-02 02:30:00	4872.42
2014-01-02 03:00:00	4842.86
2014-01-02 03:30:00	4812.56
2014-01-02 04:00:00	4790.16
2014-01-02 04:30:00	4830.82
2014-01-02 05:00:00	4861.27
2014-01-02 05:30:00	4904.78
2014-01-02 06:00:00	4929.04
2014-01-02 06:30:00	5087.17
2014-01-02 07:00:00	5300.37
2014-01-02 07:30:00	5503.82
2014-01-02 08:00:00	5621.45
2014-01-02 08:30:00	5882.41
2014-01-02 09:00:00	5979.75
2014-01-02 09:30:00	6089.97
2014-01-02 10:00:00	6099.16
2014-01-02 10:30:00	6074.79
2014-01-02 11:00:00	6192.34
2014-01-02 11:30:00	6294.01
2014-01-02 12:00:00	6389.7
2014-01-02 12:30:00	6472.67
2014-01-02 13:00:00	6643.79
2014-01-02 13:30:00	6753.95
2014-01-02 14:00:00	6909.72
2014-01-02 14:30:00	6905.79
2014-01-02 15:00:00	6912.46
2014-01-02 15:30:00	6952.67
2014-01-02 16:00:00	7027.51
2014-01-02 16:30:00	7090.9
2014-01-02 17:00:00	7190.28
2014-01-02 17:30:00	7238.52
2014-01-02 18:00:00	7277.89
2014-01-02 18:30:00	7210.32
2014-01-02 19:00:00	7195.44
2014-01-02 19:30:00	7293.59
2014-01-02 20:00:00	7239.42
2014-01-02 20:30:00	7086.07
2014-01-02 21:00:00	6973.97
2014-01-02 21:30:00	6892.03
2014-01-02 22:00:00	6675.03
2014-01-02 22:30:00	6421.3
2014-01-02 23:00:00	6244.09
2014-01-02 23:30:00	6081.24
2014-01-03	5861.31
2014-01-03 00:30:00	5654.93
2014-01-03 01:00:00	5532.82
2014-01-03 01:30:00	5323.79
2014-01-03 02:00:00	5232.03
2014-01-03 02:30:00	5171.68
2014-01-03 03:00:00	5124.46
2014-01-03 03:30:00	5085.02
2014-01-03 04:00:00	5066.14
2014-01-03 04:30:00	5087.96
2014-01-03 05:00:00	5098.82
2014-01-03 05:30:00	5152.6
2014-01-03 06:00:00	5178.69
2014-01-03 06:30:00	5417.04
2014-01-03 07:00:00	5657.58
2014-01-03 07:30:00	5959.57
2014-01-03 08:00:00	6166.97
2014-01-03 08:30:00	6380.01
2014-01-03 09:00:00	6536.03
2014-01-03 09:30:00	6738.38
2014-01-03 10:00:00	6860.43
2014-01-03 10:30:00	6896.18
2014-01-03 11:00:00	7034.27
2014-01-03 11:30:00	7153.81
2014-01-03 12:00:00	7282.45
2014-01-03 12:30:00	7405.06
2014-01-03 13:00:00	7530.25
2014-01-03 13:30:00	7640.43
2014-01-03 14:00:00	7746.59
2014-01-03 14:30:00	7834.02
2014-01-03 15:00:00	7952.97
2014-01-03 15:30:00	8056.54
2014-01-03 16:00:00	8139.66
2014-01-03 16:30:00	8239.69
2014-01-03 17:00:00	8237.9
2014-01-03 17:30:00	8221.84
2014-01-03 18:00:00	7987.26
2014-01-03 18:30:00	7774.02
2014-01-03 19:00:00	7695.73
2014-01-03 19:30:00	7722.43
2014-01-03 20:00:00	7650.55
2014-01-03 20:30:00	7494.81
2014-01-03 21:00:00	7371.06
2014-01-03 21:30:00	7322.29
2014-01-03 22:00:00	7031.46
2014-01-03 22:30:00	6801.88
2014-01-03 23:00:00	6563.61
2014-01-03 23:30:00	6365.94
2014-01-04	6119.74
2014-01-04 00:30:00	5988.3
2014-01-04 01:00:00	5822.85
2014-01-04 01:30:00	5597.58
2014-01-04 02:00:00	5465.31
2014-01-04 02:30:00	5427.01
2014-01-04 03:00:00	5362.84
2014-01-04 03:30:00	5296.59
2014-01-04 04:00:00	5299.06
2014-01-04 04:30:00	5282.33
2014-01-04 05:00:00	5264.23
2014-01-04 05:30:00	5286.38
2014-01-04 06:00:00	5293.49
2014-01-04 06:30:00	5468.36
2014-01-04 07:00:00	5648.13
2014-01-04 07:30:00	5917
2014-01-04 08:00:00	6100.75
2014-01-04 08:30:00	6317.49
2014-01-04 09:00:00	6569.18
2014-01-04 09:30:00	6859.84
2014-01-04 10:00:00	7011.76
2014-01-04 10:30:00	7206.74
2014-01-04 11:00:00	7355.87
2014-01-04 11:30:00	7446.12
2014-01-04 12:00:00	7551.3
2014-01-04 12:30:00	7631.31
2014-01-04 13:00:00	7776.72
2014-01-04 13:30:00	7889.6
2014-01-04 14:00:00	7912.81
2014-01-04 14:30:00	7954.25
2014-01-04 15:00:00	8033.87
2014-01-04 15:30:00	8086.34
2014-01-04 16:00:00	8204.97
2014-01-04 16:30:00	8279.67
2014-01-04 17:00:00	8271.63
2014-01-04 17:30:00	8321.5
2014-01-04 18:00:00	8231.51
2014-01-04 18:30:00	8021.52
2014-01-04 19:00:00	7965.9
2014-01-04 19:30:00	7947.55
2014-01-04 20:00:00	7831.17
2014-01-04 20:30:00	7708.35
2014-01-04 21:00:00	7532.18
2014-01-04 21:30:00	7406.13
2014-01-04 22:00:00	7150.94
2014-01-04 22:30:00	6852.12
2014-01-04 23:00:00	6631.91
2014-01-04 23:30:00	6410.09
2014-01-05	6156.36
2014-01-05 00:30:00	5948.97
2014-01-05 01:00:00	5734.03
2014-01-05 01:30:00	5535.26
2014-01-05 02:00:00	5393.43
2014-01-05 02:30:00	5361.09
2014-01-05 03:00:00	5326.86
2014-01-05 03:30:00	5273.39
2014-01-05 04:00:00	5247.46
2014-01-05 04:30:00	5208.05
2014-01-05 05:00:00	5217.58
2014-01-05 05:30:00	5199.74
2014-01-05 06:00:00	5199.63
2014-01-05 06:30:00	5290.82
2014-01-05 07:00:00	5390.17
2014-01-05 07:30:00	5554.45
2014-01-05 08:00:00	5644.03
2014-01-05 08:30:00	5778.86
2014-01-05 09:00:00	5978.69
2014-01-05 09:30:00	6140.99
2014-01-05 10:00:00	6236.93
2014-01-05 10:30:00	6309.08
2014-01-05 11:00:00	6353.59
2014-01-05 11:30:00	6420.05
2014-01-05 12:00:00	6527.45
2014-01-05 12:30:00	6647.84
2014-01-05 13:00:00	6749.39
2014-01-05 13:30:00	6850.21
2014-01-05 14:00:00	6909.12
2014-01-05 14:30:00	7035.7
2014-01-05 15:00:00	7068.91
2014-01-05 15:30:00	7195.55
2014-01-05 16:00:00	7254.34
2014-01-05 16:30:00	7300.34
2014-01-05 17:00:00	7396.9
2014-01-05 17:30:00	7469.47
2014-01-05 18:00:00	7503.44
2014-01-05 18:30:00	7465.75
2014-01-05 19:00:00	7443.21
2014-01-05 19:30:00	7455.14
2014-01-05 20:00:00	7324.92
2014-01-05 20:30:00	7233.2
2014-01-05 21:00:00	7112.95
2014-01-05 21:30:00	7056.87
2014-01-05 22:00:00	6808.35
2014-01-05 22:30:00	6468.98
2014-01-05 23:00:00	6268.33
2014-01-05 23:30:00	6144.77
2014-01-06	5891.23
2014-01-06 00:30:00	5779.5
2014-01-06 01:00:00	5687.96
2014-01-06 01:30:00	5474.51
2014-01-06 02:00:00	5401.26
2014-01-06 02:30:00	5371.45
2014-01-06 03:00:00	5356.9
2014-01-06 03:30:00	5294.69
2014-01-06 04:00:00	5277.59
2014-01-06 04:30:00	5331.32
2014-01-06 05:00:00	5386.99
2014-01-06 05:30:00	5513.09
2014-01-06 06:00:00	5668.09
2014-01-06 06:30:00	5947.4
2014-01-06 07:00:00	6251.85
2014-01-06 07:30:00	6613.04
2014-01-06 08:00:00	6850.1
2014-01-06 08:30:00	7075.83
2014-01-06 09:00:00	7268.01
2014-01-06 09:30:00	7303.1
2014-01-06 10:00:00	7289.6
2014-01-06 10:30:00	7417.44
2014-01-06 11:00:00	7591.5
2014-01-06 11:30:00	7617.75
2014-01-06 12:00:00	7769.39
2014-01-06 12:30:00	7927.86
2014-01-06 13:00:00	8063.64
2014-01-06 13:30:00	8108.16
2014-01-06 14:00:00	8175.54
2014-01-06 14:30:00	8155.26
2014-01-06 15:00:00	8288.54
2014-01-06 15:30:00	8236.55
2014-01-06 16:00:00	8105.5
2014-01-06 16:30:00	7801.45
2014-01-06 17:00:00	7620.41
2014-01-06 17:30:00	7430.11
2014-01-06 18:00:00	7432.76
2014-01-06 18:30:00	7305.51
2014-01-06 19:00:00	7108.11
2014-01-06 19:30:00	7103.18
2014-01-06 20:00:00	7055.63
2014-01-06 20:30:00	6935.39
2014-01-06 21:00:00	6814.77
2014-01-06 21:30:00	6765.77
2014-01-06 22:00:00	6540.44
2014-01-06 22:30:00	6258.82
2014-01-06 23:00:00	6067.39
2014-01-06 23:30:00	5948.75
2014-01-07	5768.43
2014-01-07 00:30:00	5636.47
2014-01-07 01:00:00	5461.43
2014-01-07 01:30:00	5274
2014-01-07 02:00:00	5160.27
2014-01-07 02:30:00	5115.62
2014-01-07 03:00:00	5082.45
2014-01-07 03:30:00	5097.23
2014-01-07 04:00:00	5055.42
2014-01-07 04:30:00	5029.24
2014-01-07 05:00:00	5051.1
2014-01-07 05:30:00	5158.13
2014-01-07 06:00:00	5243.18
2014-01-07 06:30:00	5503.59
2014-01-07 07:00:00	5756.04
2014-01-07 07:30:00	6070.06
2014-01-07 08:00:00	6244.35
2014-01-07 08:30:00	6435.49
2014-01-07 09:00:00	6505.86
2014-01-07 09:30:00	6555.8
2014-01-07 10:00:00	6509.88
2014-01-07 10:30:00	6524.37
2014-01-07 11:00:00	6520.31
2014-01-07 11:30:00	6538.89
2014-01-07 12:00:00	6624.52
2014-01-07 12:30:00	6606.47
2014-01-07 13:00:00	6669
2014-01-07 13:30:00	6736.46
2014-01-07 14:00:00	6798.03
2014-01-07 14:30:00	6857.34
2014-01-07 15:00:00	6903.01
2014-01-07 15:30:00	6970.71
2014-01-07 16:00:00	6945.58
2014-01-07 16:30:00	7000.12
2014-01-07 17:00:00	7044.1
2014-01-07 17:30:00	7025.86
2014-01-07 18:00:00	6960.52
2014-01-07 18:30:00	6803.07
2014-01-07 19:00:00	6773.89
2014-01-07 19:30:00	6816.14
2014-01-07 20:00:00	6763.82
2014-01-07 20:30:00	6664.03
2014-01-07 21:00:00	6488.05
2014-01-07 21:30:00	6442.68
2014-01-07 22:00:00	6284.68
2014-01-07 22:30:00	6032.47
2014-01-07 23:00:00	5879.87
2014-01-07 23:30:00	5770.73
2014-01-08	5542.77
2014-01-08 00:30:00	5358.75
2014-01-08 01:00:00	5182.02
2014-01-08 01:30:00	5004.33
2014-01-08 02:00:00	4915.97
2014-01-08 02:30:00	4825.15
2014-01-08 03:00:00	4777.7
2014-01-08 03:30:00	4798.79
2014-01-08 04:00:00	4790.78
2014-01-08 04:30:00	4828.69
2014-01-08 05:00:00	4920.13
2014-01-08 05:30:00	4949.48
2014-01-08 06:00:00	5135.87
2014-01-08 06:30:00	5414.91
2014-01-08 07:00:00	5655.78
2014-01-08 07:30:00	5903.32
2014-01-08 08:00:00	6072.47
2014-01-08 08:30:00	6192.33
2014-01-08 09:00:00	6277.75
2014-01-08 09:30:00	6312.72
2014-01-08 10:00:00	6347.92
2014-01-08 10:30:00	6372.84
2014-01-08 11:00:00	6377.7
2014-01-08 11:30:00	6369.41
2014-01-08 12:00:00	6417.03
2014-01-08 12:30:00	6437.38
2014-01-08 13:00:00	6482.9
2014-01-08 13:30:00	6505.07
2014-01-08 14:00:00	6559.69
2014-01-08 14:30:00	6596.54
2014-01-08 15:00:00	6624.51
2014-01-08 15:30:00	6674.13
2014-01-08 16:00:00	6732.51
2014-01-08 16:30:00	6710.21
2014-01-08 17:00:00	6733.51
2014-01-08 17:30:00	6736.32
2014-01-08 18:00:00	6677.05
2014-01-08 18:30:00	6581.63
2014-01-08 19:00:00	6557.61
2014-01-08 19:30:00	6579.63
2014-01-08 20:00:00	6523.95
2014-01-08 20:30:00	6399.75
2014-01-08 21:00:00	6309.43
2014-01-08 21:30:00	6313.54
2014-01-08 22:00:00	6152.62
2014-01-08 22:30:00	5882.16
2014-01-08 23:00:00	5781.43
2014-01-08 23:30:00	5656.43
2014-01-09	5484.05
2014-01-09 00:30:00	5281.42
2014-01-09 01:00:00	5152.42
2014-01-09 01:30:00	4938.84
2014-01-09 02:00:00	4844.55
2014-01-09 02:30:00	4819.14
2014-01-09 03:00:00	4768.22
2014-01-09 03:30:00	4768.67
2014-01-09 04:00:00	4749.59
2014-01-09 04:30:00	4804.24
2014-01-09 05:00:00	4843.46
2014-01-09 05:30:00	4957.24
2014-01-09 06:00:00	5099.36
2014-01-09 06:30:00	5365.97
2014-01-09 07:00:00	5626.39
2014-01-09 07:30:00	5881.12
2014-01-09 08:00:00	6073.7
2014-01-09 08:30:00	6172.5
2014-01-09 09:00:00	6240.05
2014-01-09 09:30:00	6312.24
2014-01-09 10:00:00	6294.22
2014-01-09 10:30:00	6305.52
2014-01-09 11:00:00	6306.69
2014-01-09 11:30:00	6224.86
2014-01-09 12:00:00	6194.75
2014-01-09 12:30:00	6168.1
2014-01-09 13:00:00	6192.35
2014-01-09 13:30:00	6225.21
2014-01-09 14:00:00	6321.43
2014-01-09 14:30:00	6265.68
2014-01-09 15:00:00	6294.15
2014-01-09 15:30:00	6359.52
2014-01-09 16:00:00	6425.78
2014-01-09 16:30:00	6459.23
2014-01-09 17:00:00	6561.24
2014-01-09 17:30:00	6555.52
2014-01-09 18:00:00	6563.2
2014-01-09 18:30:00	6502.74
2014-01-09 19:00:00	6509.4
2014-01-09 19:30:00	6639.52
2014-01-09 20:00:00	6539.25
2014-01-09 20:30:00	6436.39
2014-01-09 21:00:00	6344.8
2014-01-09 21:30:00	6286.9
2014-01-09 22:00:00	6077.73
2014-01-09 22:30:00	5834.64
2014-01-09 23:00:00	5694
2014-01-09 23:30:00	5655.87
2014-01-10	5445.86
2014-01-10 00:30:00	5322.05
2014-01-10 01:00:00	5148.65
2014-01-10 01:30:00	4946.98
2014-01-10 02:00:00	4835.93
2014-01-10 02:30:00	4811.17
2014-01-10 03:00:00	4775.05
2014-01-10 03:30:00	4752.7
2014-01-10 04:00:00	4772.64
2014-01-10 04:30:00	4765.45
2014-01-10 05:00:00	4872.53
2014-01-10 05:30:00	4942.37
2014-01-10 06:00:00	5104.23
2014-01-10 06:30:00	5358.15
2014-01-10 07:00:00	5589.76
2014-01-10 07:30:00	5920.33
2014-01-10 08:00:00	6055.03
2014-01-10 08:30:00	6201.05
2014-01-10 09:00:00	6275.77
2014-01-10 09:30:00	6341.46
2014-01-10 10:00:00	6434.82
2014-01-10 10:30:00	6442.56
2014-01-10 11:00:00	6367.2
2014-01-10 11:30:00	6384.26
2014-01-10 12:00:00	6418.67
2014-01-10 12:30:00	6420.98
2014-01-10 13:00:00	6389.38
2014-01-10 13:30:00	6363.95
2014-01-10 14:00:00	6368.13
2014-01-10 14:30:00	6365.73
2014-01-10 15:00:00	6356.54
2014-01-10 15:30:00	6375.9
2014-01-10 16:00:00	6388.82
2014-01-10 16:30:00	6407.01
2014-01-10 17:00:00	6486.06
2014-01-10 17:30:00	6516.42
2014-01-10 18:00:00	6427.56
2014-01-10 18:30:00	6245.27
2014-01-10 19:00:00	6278.21
2014-01-10 19:30:00	6386.97
2014-01-10 20:00:00	6315.8
2014-01-10 20:30:00	6216.1
2014-01-10 21:00:00	6123.1
2014-01-10 21:30:00	6150.67
2014-01-10 22:00:00	5987.63
2014-01-10 22:30:00	5808.93
2014-01-10 23:00:00	5713.35
2014-01-10 23:30:00	5636.89
2014-01-11	5460.67
2014-01-11 00:30:00	5281.32
2014-01-11 01:00:00	5124.13
2014-01-11 01:30:00	4927.6
2014-01-11 02:00:00	4786.82
2014-01-11 02:30:00	4724.09
2014-01-11 03:00:00	4644.68
2014-01-11 03:30:00	4608.1
2014-01-11 04:00:00	4622.68
2014-01-11 04:30:00	4667.74
2014-01-11 05:00:00	4752.42
2014-01-11 05:30:00	4711.88
2014-01-11 06:00:00	4748.09
2014-01-11 06:30:00	4842.38
2014-01-11 07:00:00	4944.04
2014-01-11 07:30:00	5131.21
2014-01-11 08:00:00	5224.46
2014-01-11 08:30:00	5412.83
2014-01-11 09:00:00	5566.51
2014-01-11 09:30:00	5603.06
2014-01-11 10:00:00	5647.79
2014-01-11 10:30:00	5625.21
2014-01-11 11:00:00	5661.26
2014-01-11 11:30:00	5670.55
2014-01-11 12:00:00	5703.21
2014-01-11 12:30:00	5700.81
2014-01-11 13:00:00	5685.95
2014-01-11 13:30:00	5691.09
2014-01-11 14:00:00	5670.79
2014-01-11 14:30:00	5715.1
2014-01-11 15:00:00	5779.28
2014-01-11 15:30:00	5830.88
2014-01-11 16:00:00	5868.36
2014-01-11 16:30:00	5988.97
2014-01-11 17:00:00	6162.27
2014-01-11 17:30:00	6177.95
2014-01-11 18:00:00	6196.51
2014-01-11 18:30:00	6131.26
2014-01-11 19:00:00	6137.04
2014-01-11 19:30:00	6204.04
2014-01-11 20:00:00	6174.31
2014-01-11 20:30:00	6099.97
2014-01-11 21:00:00	6047.57
2014-01-11 21:30:00	6075.49
2014-01-11 22:00:00	5940.98
2014-01-11 22:30:00	5788.35
2014-01-11 23:00:00	5725.08
2014-01-11 23:30:00	5638.4
2014-01-12	5449.43
2014-01-12 00:30:00	5215.62
2014-01-12 01:00:00	5084.47
2014-01-12 01:30:00	4886.01
2014-01-12 02:00:00	4809.56
2014-01-12 02:30:00	4749.64
2014-01-12 03:00:00	4699.75
2014-01-12 03:30:00	4656.34
2014-01-12 04:00:00	4634.27
2014-01-12 04:30:00	4628.3
2014-01-12 05:00:00	4659.99
2014-01-12 05:30:00	4633.69
2014-01-12 06:00:00	4653.83
2014-01-12 06:30:00	4674.43
2014-01-12 07:00:00	4772.98
2014-01-12 07:30:00	4881.18
2014-01-12 08:00:00	4961.69
2014-01-12 08:30:00	5049.55
2014-01-12 09:00:00	5308.22
2014-01-12 09:30:00	5404.84
2014-01-12 10:00:00	5448.82
2014-01-12 10:30:00	5447.06
2014-01-12 11:00:00	5460.2
2014-01-12 11:30:00	5445.16
2014-01-12 12:00:00	5541.37
2014-01-12 12:30:00	5588.76
2014-01-12 13:00:00	5632
2014-01-12 13:30:00	5650.53
2014-01-12 14:00:00	5747.21
2014-01-12 14:30:00	5807.2
2014-01-12 15:00:00	5889.1
2014-01-12 15:30:00	5923.89
2014-01-12 16:00:00	5991.53
2014-01-12 16:30:00	6051.15
2014-01-12 17:00:00	6176.92
2014-01-12 17:30:00	6278.52
2014-01-12 18:00:00	6337.27
2014-01-12 18:30:00	6311.52
2014-01-12 19:00:00	6296.67
2014-01-12 19:30:00	6388.18
2014-01-12 20:00:00	6301.35
2014-01-12 20:30:00	6249.49
2014-01-12 21:00:00	6175.31
2014-01-12 21:30:00	6162.2
2014-01-12 22:00:00	6018.44
2014-01-12 22:30:00	5809.28
2014-01-12 23:00:00	5682.91
2014-01-12 23:30:00	5603.78
2014-01-13	5369.44
2014-01-13 00:30:00	5188.3
2014-01-13 01:00:00	5057.13
2014-01-13 01:30:00	4869.3
2014-01-13 02:00:00	4785.08
2014-01-13 02:30:00	4763.77
2014-01-13 03:00:00	4737.78
2014-01-13 03:30:00	4718.93
2014-01-13 04:00:00	4706.47
2014-01-13 04:30:00	4745.76
2014-01-13 05:00:00	4862.14
2014-01-13 05:30:00	4923.12
2014-01-13 06:00:00	5085.74
2014-01-13 06:30:00	5390.76
2014-01-13 07:00:00	5648.82
2014-01-13 07:30:00	5964.35
2014-01-13 08:00:00	6229.75
2014-01-13 08:30:00	6374.95
2014-01-13 09:00:00	6495.36
2014-01-13 09:30:00	6461.57
2014-01-13 10:00:00	6427.55
2014-01-13 10:30:00	6447.65
2014-01-13 11:00:00	6484.47
2014-01-13 11:30:00	6491.07
2014-01-13 12:00:00	6520.98
2014-01-13 12:30:00	6555.46
2014-01-13 13:00:00	6575.73
2014-01-13 13:30:00	6603.85
2014-01-13 14:00:00	6670.09
2014-01-13 14:30:00	6692.32
2014-01-13 15:00:00	6764.76
2014-01-13 15:30:00	6730.75
2014-01-13 16:00:00	6822.5
2014-01-13 16:30:00	6825.6
2014-01-13 17:00:00	6891.86
2014-01-13 17:30:00	6915.73
2014-01-13 18:00:00	6897.4
2014-01-13 18:30:00	6701.66
2014-01-13 19:00:00	6702.22
2014-01-13 19:30:00	6809.25
2014-01-13 20:00:00	6725.55
2014-01-13 20:30:00	6598.7
2014-01-13 21:00:00	6471.91
2014-01-13 21:30:00	6443.48
2014-01-13 22:00:00	6271.23
2014-01-13 22:30:00	6021.86
2014-01-13 23:00:00	5819.89
2014-01-13 23:30:00	5721.83
2014-01-14	5573.88
2014-01-14 00:30:00	5426.2
2014-01-14 01:00:00	5248.8
2014-01-14 01:30:00	5059.76
2014-01-14 02:00:00	4945.48
2014-01-14 02:30:00	4896.95
2014-01-14 03:00:00	4838.39
2014-01-14 03:30:00	4835.69
2014-01-14 04:00:00	4831.22
2014-01-14 04:30:00	4895.13
2014-01-14 05:00:00	4938.05
2014-01-14 05:30:00	5054.56
2014-01-14 06:00:00	5170.55
2014-01-14 06:30:00	5489.65
2014-01-14 07:00:00	5723.52
2014-01-14 07:30:00	6019.64
2014-01-14 08:00:00	6162.48
2014-01-14 08:30:00	6300.57
2014-01-14 09:00:00	6299.86
2014-01-14 09:30:00	6326.62
2014-01-14 10:00:00	6300.98
2014-01-14 10:30:00	6339.5
2014-01-14 11:00:00	6333.67
2014-01-14 11:30:00	6367.82
2014-01-14 12:00:00	6406.57
2014-01-14 12:30:00	6418.16
2014-01-14 13:00:00	6427.07
2014-01-14 13:30:00	6504.79
2014-01-14 14:00:00	6556.13
2014-01-14 14:30:00	6650.32
2014-01-14 15:00:00	6745.31
2014-01-14 15:30:00	6705.78
2014-01-14 16:00:00	6787.96
2014-01-14 16:30:00	6800.99
2014-01-14 17:00:00	6793.69
2014-01-14 17:30:00	6861.24
2014-01-14 18:00:00	6795.42
2014-01-14 18:30:00	6629.86
2014-01-14 19:00:00	6590.21
2014-01-14 19:30:00	6718.73
2014-01-14 20:00:00	6715.24
2014-01-14 20:30:00	6562.45
2014-01-14 21:00:00	6450.48
2014-01-14 21:30:00	6455.46
2014-01-14 22:00:00	6254.99
2014-01-14 22:30:00	6000.47
2014-01-14 23:00:00	5825.8
2014-01-14 23:30:00	5721.88
2014-01-15	5556.35
2014-01-15 00:30:00	5432.1
2014-01-15 01:00:00	5196.78
2014-01-15 01:30:00	5013.17
2014-01-15 02:00:00	4954.71
2014-01-15 02:30:00	4908.64
2014-01-15 03:00:00	4838.58
2014-01-15 03:30:00	4843.4
2014-01-15 04:00:00	4825.27
2014-01-15 04:30:00	4867.12
2014-01-15 05:00:00	4918.7
2014-01-15 05:30:00	5010.43
2014-01-15 06:00:00	5158.02
2014-01-15 06:30:00	5443.79
2014-01-15 07:00:00	5714.07
2014-01-15 07:30:00	6050.76
2014-01-15 08:00:00	6244.33
2014-01-15 08:30:00	6400.93
2014-01-15 09:00:00	6413.4
2014-01-15 09:30:00	6480.97
2014-01-15 10:00:00	6455.71
2014-01-15 10:30:00	6507.53
2014-01-15 11:00:00	6526.39
2014-01-15 11:30:00	6509.17
2014-01-15 12:00:00	6586.17
2014-01-15 12:30:00	6572.04
2014-01-15 13:00:00	6617.6
2014-01-15 13:30:00	6616.46
2014-01-15 14:00:00	6686.56
2014-01-15 14:30:00	6732.55
2014-01-15 15:00:00	6789.43
2014-01-15 15:30:00	6787.2
2014-01-15 16:00:00	6829.57
2014-01-15 16:30:00	6843
2014-01-15 17:00:00	6854.08
2014-01-15 17:30:00	6860.52
2014-01-15 18:00:00	6834.11
2014-01-15 18:30:00	6630.81
2014-01-15 19:00:00	6671.47
2014-01-15 19:30:00	6819.59
2014-01-15 20:00:00	6773.5
2014-01-15 20:30:00	6673.38
2014-01-15 21:00:00	6523.73
2014-01-15 21:30:00	6491.59
2014-01-15 22:00:00	6278.1
2014-01-15 22:30:00	6042.42
2014-01-15 23:00:00	5885.74
2014-01-15 23:30:00	5770.86
2014-01-16	5575.57
2014-01-16 00:30:00	5372.28
2014-01-16 01:00:00	5160.09
2014-01-16 01:30:00	5022.59
2014-01-16 02:00:00	4926.77
2014-01-16 02:30:00	4906.13
2014-01-16 03:00:00	4895.62
2014-01-16 03:30:00	4870.54
2014-01-16 04:00:00	4813.65
2014-01-16 04:30:00	4861.59
2014-01-16 05:00:00	4962.99
2014-01-16 05:30:00	5037.17
2014-01-16 06:00:00	5196.55
2014-01-16 06:30:00	5451.9
2014-01-16 07:00:00	5748.24
2014-01-16 07:30:00	6046.01
2014-01-16 08:00:00	6247.26
2014-01-16 08:30:00	6381.17
2014-01-16 09:00:00	6475.99
2014-01-16 09:30:00	6412.02
2014-01-16 10:00:00	6407.21
2014-01-16 10:30:00	6406.67
2014-01-16 11:00:00	6450.75
2014-01-16 11:30:00	6477.07
2014-01-16 12:00:00	6515.53
2014-01-16 12:30:00	6545.07
2014-01-16 13:00:00	6540.85
2014-01-16 13:30:00	6577.62
2014-01-16 14:00:00	6686.16
2014-01-16 14:30:00	6721.26
2014-01-16 15:00:00	6750.9
2014-01-16 15:30:00	6832.06
2014-01-16 16:00:00	6861.81
2014-01-16 16:30:00	6934.33
2014-01-16 17:00:00	7014.78
2014-01-16 17:30:00	6952.56
2014-01-16 18:00:00	6987.13
2014-01-16 18:30:00	6895.04
2014-01-16 19:00:00	6888.59
2014-01-16 19:30:00	6962.5
2014-01-16 20:00:00	6922.1
2014-01-16 20:30:00	6805.04
2014-01-16 21:00:00	6719.52
2014-01-16 21:30:00	6621.26
2014-01-16 22:00:00	6389.97
2014-01-16 22:30:00	6153.32
2014-01-16 23:00:00	5972.75
2014-01-16 23:30:00	5826.53
2014-01-17	5634.59
2014-01-17 00:30:00	5457.4
2014-01-17 01:00:00	5265.73
2014-01-17 01:30:00	5040.65
2014-01-17 02:00:00	5013.96
2014-01-17 02:30:00	4972.46
2014-01-17 03:00:00	4935.69
2014-01-17 03:30:00	4933.83
2014-01-17 04:00:00	4908.35
2014-01-17 04:30:00	4974.31
2014-01-17 05:00:00	4993.88
2014-01-17 05:30:00	5137.8
2014-01-17 06:00:00	5287.05
2014-01-17 06:30:00	5593.93
2014-01-17 07:00:00	5853.26
2014-01-17 07:30:00	6118.78
2014-01-17 08:00:00	6304.33
2014-01-17 08:30:00	6411.35
2014-01-17 09:00:00	6469.52
2014-01-17 09:30:00	6555.32
2014-01-17 10:00:00	6532.31
2014-01-17 10:30:00	6512.56
2014-01-17 11:00:00	6508.8
2014-01-17 11:30:00	6484.56
2014-01-17 12:00:00	6545.62
2014-01-17 12:30:00	6527.82
2014-01-17 13:00:00	6537.99
2014-01-17 13:30:00	6596.38
2014-01-17 14:00:00	6643.51
2014-01-17 14:30:00	6686.57
2014-01-17 15:00:00	6710.21
2014-01-17 15:30:00	6716.96
2014-01-17 16:00:00	6782.4
2014-01-17 16:30:00	6860.4
2014-01-17 17:00:00	6925.59
2014-01-17 17:30:00	6901.89
2014-01-17 18:00:00	6846.25
2014-01-17 18:30:00	6667.96
2014-01-17 19:00:00	6597.06
2014-01-17 19:30:00	6705.14
2014-01-17 20:00:00	6676.75
2014-01-17 20:30:00	6568.96
2014-01-17 21:00:00	6466.95
2014-01-17 21:30:00	6423.02
2014-01-17 22:00:00	6244.72
2014-01-17 22:30:00	6089.37
2014-01-17 23:00:00	5949.52
2014-01-17 23:30:00	5838.59
2014-01-18	5647.85
2014-01-18 00:30:00	5461.02
2014-01-18 01:00:00	5294.33
2014-01-18 01:30:00	5063.16
2014-01-18 02:00:00	4978.83
2014-01-18 02:30:00	4915.67
2014-01-18 03:00:00	4877.46
2014-01-18 03:30:00	4828.87
2014-01-18 04:00:00	4823.83
2014-01-18 04:30:00	4836.78
2014-01-18 05:00:00	4819.02
2014-01-18 05:30:00	4872.85
2014-01-18 06:00:00	4854.25
2014-01-18 06:30:00	4942.81
2014-01-18 07:00:00	5170.68
2014-01-18 07:30:00	5347.44
2014-01-18 08:00:00	5471.05
2014-01-18 08:30:00	5601.59
2014-01-18 09:00:00	5736.51
2014-01-18 09:30:00	5816.88
2014-01-18 10:00:00	5840.09
2014-01-18 10:30:00	5880.81
2014-01-18 11:00:00	5865.52
2014-01-18 11:30:00	5779.22
2014-01-18 12:00:00	5828.11
2014-01-18 12:30:00	5807.85
2014-01-18 13:00:00	5845.25
2014-01-18 13:30:00	5874.78
2014-01-18 14:00:00	5895.66
2014-01-18 14:30:00	6007.98
2014-01-18 15:00:00	6061.17
2014-01-18 15:30:00	6209.63
2014-01-18 16:00:00	6237.86
2014-01-18 16:30:00	6338.89
2014-01-18 17:00:00	6465.44
2014-01-18 17:30:00	6497.13
2014-01-18 18:00:00	6525.46
2014-01-18 18:30:00	6429.03
2014-01-18 19:00:00	6439.35
2014-01-18 19:30:00	6520.44
2014-01-18 20:00:00	6478.32
2014-01-18 20:30:00	6394.47
2014-01-18 21:00:00	6305.71
2014-01-18 21:30:00	6310.3
2014-01-18 22:00:00	6140.81
2014-01-18 22:30:00	5968.77
2014-01-18 23:00:00	5857.35
2014-01-18 23:30:00	5772.41
2014-01-19	5549.37
2014-01-19 00:30:00	5407.91
2014-01-19 01:00:00	5225.39
2014-01-19 01:30:00	5050.58
2014-01-19 02:00:00	4941.54
2014-01-19 02:30:00	4883.55
2014-01-19 03:00:00	4838.76
2014-01-19 03:30:00	4816.97
2014-01-19 04:00:00	4802
2014-01-19 04:30:00	4777.36
2014-01-19 05:00:00	4795.2
2014-01-19 05:30:00	4775.58
2014-01-19 06:00:00	4814.49
2014-01-19 06:30:00	4856.03
2014-01-19 07:00:00	4966.03
2014-01-19 07:30:00	5149.65
2014-01-19 08:00:00	5203.14
2014-01-19 08:30:00	5335.91
2014-01-19 09:00:00	5480.64
2014-01-19 09:30:00	5564.14
2014-01-19 10:00:00	5585.08
2014-01-19 10:30:00	5638.92
2014-01-19 11:00:00	5676.71
2014-01-19 11:30:00	5697.72
2014-01-19 12:00:00	5767.6
2014-01-19 12:30:00	5776.62
2014-01-19 13:00:00	5859.37
2014-01-19 13:30:00	5934.69
2014-01-19 14:00:00	6032.58
2014-01-19 14:30:00	6125.15
2014-01-19 15:00:00	6247.41
2014-01-19 15:30:00	6372.57
2014-01-19 16:00:00	6459.3
2014-01-19 16:30:00	6553.39
2014-01-19 17:00:00	6658.13
2014-01-19 17:30:00	6750.26
2014-01-19 18:00:00	6776.15
2014-01-19 18:30:00	6732
2014-01-19 19:00:00	6728.14
2014-01-19 19:30:00	6802.69
2014-01-19 20:00:00	6724.68
2014-01-19 20:30:00	6652.79
2014-01-19 21:00:00	6546.04
2014-01-19 21:30:00	6492.94
2014-01-19 22:00:00	6231.24
2014-01-19 22:30:00	6022.07
2014-01-19 23:00:00	5849
2014-01-19 23:30:00	5749.08
2014-01-20	5521.72
2014-01-20 00:30:00	5411.57
2014-01-20 01:00:00	5242.55
2014-01-20 01:30:00	5089.55
2014-01-20 02:00:00	4985.51
2014-01-20 02:30:00	4964.19
2014-01-20 03:00:00	4913.57
2014-01-20 03:30:00	4888.29
2014-01-20 04:00:00	4884.51
2014-01-20 04:30:00	4913.47
2014-01-20 05:00:00	4981.5
2014-01-20 05:30:00	5158.31
2014-01-20 06:00:00	5255.06
2014-01-20 06:30:00	5579.61
2014-01-20 07:00:00	5873.2
2014-01-20 07:30:00	6256.99
2014-01-20 08:00:00	6427.82
2014-01-20 08:30:00	6622.6
2014-01-20 09:00:00	6744.78
2014-01-20 09:30:00	6875.51
2014-01-20 10:00:00	6893.18
2014-01-20 10:30:00	6957.82
2014-01-20 11:00:00	7005.08
2014-01-20 11:30:00	7137.59
2014-01-20 12:00:00	7193.39
2014-01-20 12:30:00	7280.79
2014-01-20 13:00:00	7414.6
2014-01-20 13:30:00	7477.09
2014-01-20 14:00:00	7580.18
2014-01-20 14:30:00	7661.4
2014-01-20 15:00:00	7760.06
2014-01-20 15:30:00	7826.2
2014-01-20 16:00:00	7807.38
2014-01-20 16:30:00	7893.34
2014-01-20 17:00:00	7908.57
2014-01-20 17:30:00	7826.51
2014-01-20 18:00:00	7790.09
2014-01-20 18:30:00	7597.58
2014-01-20 19:00:00	7610.23
2014-01-20 19:30:00	7632.4
2014-01-20 20:00:00	7511.58
2014-01-20 20:30:00	7414.91
2014-01-20 21:00:00	7250.47
2014-01-20 21:30:00	7166.2
2014-01-20 22:00:00	6857.3
2014-01-20 22:30:00	6523.4
2014-01-20 23:00:00	6319.49
2014-01-20 23:30:00	6123.41
2014-01-21	5927.6
2014-01-21 00:30:00	5733.61
2014-01-21 01:00:00	5530.59
2014-01-21 01:30:00	5364.41
2014-01-21 02:00:00	5269.79
2014-01-21 02:30:00	5205.34
2014-01-21 03:00:00	5182.37
2014-01-21 03:30:00	5132.08
2014-01-21 04:00:00	5074.14
2014-01-21 04:30:00	5100.21
2014-01-21 05:00:00	5154.51
2014-01-21 05:30:00	5247.78
2014-01-21 06:00:00	5395.55
2014-01-21 06:30:00	5744.55
2014-01-21 07:00:00	6034.39
2014-01-21 07:30:00	6405.58
2014-01-21 08:00:00	6607.65
2014-01-21 08:30:00	6821.63
2014-01-21 09:00:00	6974.5
2014-01-21 09:30:00	6996.26
2014-01-21 10:00:00	7165.96
2014-01-21 10:30:00	7292.86
2014-01-21 11:00:00	7396.52
2014-01-21 11:30:00	7457.03
2014-01-21 12:00:00	7536.46
2014-01-21 12:30:00	7552.83
2014-01-21 13:00:00	7733.18
2014-01-21 13:30:00	7833.25
2014-01-21 14:00:00	7920.94
2014-01-21 14:30:00	7997.28
2014-01-21 15:00:00	8036.05
2014-01-21 15:30:00	8125.97
2014-01-21 16:00:00	8113.61
2014-01-21 16:30:00	8179.2
2014-01-21 17:00:00	8191.89
2014-01-21 17:30:00	8140.23
2014-01-21 18:00:00	8020.58
2014-01-21 18:30:00	7919.7
2014-01-21 19:00:00	7792.83
2014-01-21 19:30:00	7901.21
2014-01-21 20:00:00	7747.92
2014-01-21 20:30:00	7589.01
2014-01-21 21:00:00	7438.5
2014-01-21 21:30:00	7315.6
2014-01-21 22:00:00	7021.09
2014-01-21 22:30:00	6710.85
2014-01-21 23:00:00	6473.4
2014-01-21 23:30:00	6307.11
2014-01-22	6050.74
2014-01-22 00:30:00	5839.75
2014-01-22 01:00:00	5656.59
2014-01-22 01:30:00	5477.69
2014-01-22 02:00:00	5357.28
2014-01-22 02:30:00	5280.61
2014-01-22 03:00:00	5240.26
2014-01-22 03:30:00	5237.12
2014-01-22 04:00:00	5227.1
2014-01-22 04:30:00	5264.41
2014-01-22 05:00:00	5289.08
2014-01-22 05:30:00	5425.98
2014-01-22 06:00:00	5576.6
2014-01-22 06:30:00	5894.25
2014-01-22 07:00:00	6278.4
2014-01-22 07:30:00	6595.31
2014-01-22 08:00:00	6810.43
2014-01-22 08:30:00	6971.29
2014-01-22 09:00:00	7047.5
2014-01-22 09:30:00	7191.68
2014-01-22 10:00:00	7273.63
2014-01-22 10:30:00	7399.94
2014-01-22 11:00:00	7513.39
2014-01-22 11:30:00	7606.84
2014-01-22 12:00:00	7805.73
2014-01-22 12:30:00	7925.57
2014-01-22 13:00:00	8018.27
2014-01-22 13:30:00	8109.13
2014-01-22 14:00:00	8215.08
2014-01-22 14:30:00	8231.09
2014-01-22 15:00:00	8316.22
2014-01-22 15:30:00	8364.63
2014-01-22 16:00:00	8335.77
2014-01-22 16:30:00	8244.86
2014-01-22 17:00:00	8136.02
2014-01-22 17:30:00	8030.91
2014-01-22 18:00:00	7888.01
2014-01-22 18:30:00	7729.04
2014-01-22 19:00:00	7734.61
2014-01-22 19:30:00	7704.31
2014-01-22 20:00:00	7545.46
2014-01-22 20:30:00	7357.41
2014-01-22 21:00:00	7200.74
2014-01-22 21:30:00	7117.51
2014-01-22 22:00:00	6878.64
2014-01-22 22:30:00	6588.99
2014-01-22 23:00:00	6307.71
2014-01-22 23:30:00	6111.09
2014-01-23	5960.65
2014-01-23 00:30:00	5742.55
2014-01-23 01:00:00	5630.48
2014-01-23 01:30:00	5432.57
2014-01-23 02:00:00	5314.68
2014-01-23 02:30:00	5265.45
2014-01-23 03:00:00	5206.38
2014-01-23 03:30:00	5194.01
2014-01-23 04:00:00	5187.09
2014-01-23 04:30:00	5224.79
2014-01-23 05:00:00	5252.9
2014-01-23 05:30:00	5428.77
2014-01-23 06:00:00	5552.05
2014-01-23 06:30:00	5894.73
2014-01-23 07:00:00	6248.77
2014-01-23 07:30:00	6543.71
2014-01-23 08:00:00	6717.99
2014-01-23 08:30:00	6893.61
2014-01-23 09:00:00	6914.52
2014-01-23 09:30:00	6998.79
2014-01-23 10:00:00	7034.28
2014-01-23 10:30:00	7143.39
2014-01-23 11:00:00	7225.39
2014-01-23 11:30:00	7238.08
2014-01-23 12:00:00	7271.29
2014-01-23 12:30:00	7280.03
2014-01-23 13:00:00	7340.27
2014-01-23 13:30:00	7359.34
2014-01-23 14:00:00	7457.22
2014-01-23 14:30:00	7462.19
2014-01-23 15:00:00	7426.48
2014-01-23 15:30:00	7325.11
2014-01-23 16:00:00	7315.75
2014-01-23 16:30:00	7239.97
2014-01-23 17:00:00	7238.06
2014-01-23 17:30:00	7166.64
2014-01-23 18:00:00	7163.65
2014-01-23 18:30:00	7042.47
2014-01-23 19:00:00	7064.65
2014-01-23 19:30:00	7041.4
2014-01-23 20:00:00	6910.52
2014-01-23 20:30:00	6769.81
2014-01-23 21:00:00	6649.69
2014-01-23 21:30:00	6563.89
2014-01-23 22:00:00	6279.95
2014-01-23 22:30:00	6078.42
2014-01-23 23:00:00	5942.27
2014-01-23 23:30:00	5798.91
2014-01-24	5616.83
2014-01-24 00:30:00	5462.31
2014-01-24 01:00:00	5291.26
2014-01-24 01:30:00	5074.95
2014-01-24 02:00:00	4952.17
2014-01-24 02:30:00	4924.66
2014-01-24 03:00:00	4924.34
2014-01-24 03:30:00	4903.95
2014-01-24 04:00:00	4913.31
2014-01-24 04:30:00	4946.66
2014-01-24 05:00:00	5028.04
2014-01-24 05:30:00	5158.27
2014-01-24 06:00:00	5273.39
2014-01-24 06:30:00	5608.79
2014-01-24 07:00:00	5930.7
2014-01-24 07:30:00	6222.39
2014-01-24 08:00:00	6399.06
2014-01-24 08:30:00	6590.14
2014-01-24 09:00:00	6711.42
2014-01-24 09:30:00	6763.47
2014-01-24 10:00:00	6790.27
2014-01-24 10:30:00	6826.71
2014-01-24 11:00:00	6870.18
2014-01-24 11:30:00	6814.3
2014-01-24 12:00:00	6824.57
2014-01-24 12:30:00	6788.74
2014-01-24 13:00:00	6852.08
2014-01-24 13:30:00	6895.44
2014-01-24 14:00:00	6922.64
2014-01-24 14:30:00	7006.34
2014-01-24 15:00:00	7036.36
2014-01-24 15:30:00	7036.4
2014-01-24 16:00:00	7062.9
2014-01-24 16:30:00	7084.58
2014-01-24 17:00:00	7110.32
2014-01-24 17:30:00	7085.27
2014-01-24 18:00:00	6995.95
2014-01-24 18:30:00	6806.93
2014-01-24 19:00:00	6803.03
2014-01-24 19:30:00	6924.83
2014-01-24 20:00:00	6847.78
2014-01-24 20:30:00	6798.57
2014-01-24 21:00:00	6706.22
2014-01-24 21:30:00	6603.24
2014-01-24 22:00:00	6434.97
2014-01-24 22:30:00	6229.66
2014-01-24 23:00:00	6101
2014-01-24 23:30:00	5967.61
2014-01-25	5776.26
2014-01-25 00:30:00	5616.94
2014-01-25 01:00:00	5447.86
2014-01-25 01:30:00	5212.75
2014-01-25 02:00:00	5092.79
2014-01-25 02:30:00	5053.03
2014-01-25 03:00:00	5040.45
2014-01-25 03:30:00	5030.24
2014-01-25 04:00:00	5000.61
2014-01-25 04:30:00	5017.45
2014-01-25 05:00:00	5021.82
2014-01-25 05:30:00	5053.5
2014-01-25 06:00:00	5046.85
2014-01-25 06:30:00	5180.6
2014-01-25 07:00:00	5334.4
2014-01-25 07:30:00	5590.42
2014-01-25 08:00:00	5719.99
2014-01-25 08:30:00	5905.09
2014-01-25 09:00:00	6050.24
2014-01-25 09:30:00	6151.31
2014-01-25 10:00:00	6176.29
2014-01-25 10:30:00	6208.38
2014-01-25 11:00:00	6213.8
2014-01-25 11:30:00	6149.42
2014-01-25 12:00:00	6160.21
2014-01-25 12:30:00	6093.83
2014-01-25 13:00:00	6151.48
2014-01-25 13:30:00	6147.64
2014-01-25 14:00:00	6290.02
2014-01-25 14:30:00	6319.2
2014-01-25 15:00:00	6355.38
2014-01-25 15:30:00	6386.79
2014-01-25 16:00:00	6422.37
2014-01-25 16:30:00	6452.24
2014-01-25 17:00:00	6522.96
2014-01-25 17:30:00	6553.88
2014-01-25 18:00:00	6530.78
2014-01-25 18:30:00	6464.58
2014-01-25 19:00:00	6467.66
2014-01-25 19:30:00	6525.06
2014-01-25 20:00:00	6460.31
2014-01-25 20:30:00	6338.15
2014-01-25 21:00:00	6278.48
2014-01-25 21:30:00	6316.22
2014-01-25 22:00:00	6151.87
2014-01-25 22:30:00	5974.87
2014-01-25 23:00:00	5859.16
2014-01-25 23:30:00	5764.78
2014-01-26	5550.04
2014-01-26 00:30:00	5445.87
2014-01-26 01:00:00	5232.62
2014-01-26 01:30:00	5082.46
2014-01-26 02:00:00	4962.14
2014-01-26 02:30:00	4886.04
2014-01-26 03:00:00	4855.18
2014-01-26 03:30:00	4848.33
2014-01-26 04:00:00	4805.94
2014-01-26 04:30:00	4797.73
2014-01-26 05:00:00	4839.46
2014-01-26 05:30:00	4808.54
2014-01-26 06:00:00	4792.74
2014-01-26 06:30:00	4828.89
2014-01-26 07:00:00	4948.04
2014-01-26 07:30:00	5096
2014-01-26 08:00:00	5145
2014-01-26 08:30:00	5313.31
2014-01-26 09:00:00	5389.16
2014-01-26 09:30:00	5452.37
2014-01-26 10:00:00	5464.94
2014-01-26 10:30:00	5495.28
2014-01-26 11:00:00	5479.7
2014-01-26 11:30:00	5428.46
2014-01-26 12:00:00	5377.48
2014-01-26 12:30:00	5334.37
2014-01-26 13:00:00	5379.74
2014-01-26 13:30:00	5379.35
2014-01-26 14:00:00	5407.49
2014-01-26 14:30:00	5416.82
2014-01-26 15:00:00	5372.39
2014-01-26 15:30:00	5404.19
2014-01-26 16:00:00	5478.52
2014-01-26 16:30:00	5532.35
2014-01-26 17:00:00	5643.79
2014-01-26 17:30:00	5763.11
2014-01-26 18:00:00	5825.22
2014-01-26 18:30:00	5813.97
2014-01-26 19:00:00	5854.12
2014-01-26 19:30:00	5908.88
2014-01-26 20:00:00	5871.82
2014-01-26 20:30:00	5808.95
2014-01-26 21:00:00	5809.26
2014-01-26 21:30:00	5791.03
2014-01-26 22:00:00	5685.19
2014-01-26 22:30:00	5542.09
2014-01-26 23:00:00	5451.25
2014-01-26 23:30:00	5385.07
2014-01-27	5250.67
2014-01-27 00:30:00	5060.5
2014-01-27 01:00:00	4909.62
2014-01-27 01:30:00	4709.37
2014-01-27 02:00:00	4642.88
2014-01-27 02:30:00	4609.95
2014-01-27 03:00:00	4566.57
2014-01-27 03:30:00	4535.33
2014-01-27 04:00:00	4547.51
2014-01-27 04:30:00	4573.59
2014-01-27 05:00:00	4605.92
2014-01-27 05:30:00	4655.94
2014-01-27 06:00:00	4607.33
2014-01-27 06:30:00	4732.44
2014-01-27 07:00:00	4825.85
2014-01-27 07:30:00	5001.68
2014-01-27 08:00:00	5101.15
2014-01-27 08:30:00	5267.54
2014-01-27 09:00:00	5321.13
2014-01-27 09:30:00	5372.36
2014-01-27 10:00:00	5442
2014-01-27 10:30:00	5504.63
2014-01-27 11:00:00	5493.8
2014-01-27 11:30:00	5445.1
2014-01-27 12:00:00	5437.78
2014-01-27 12:30:00	5466.63
2014-01-27 13:00:00	5499.06
2014-01-27 13:30:00	5535.53
2014-01-27 14:00:00	5526.29
2014-01-27 14:30:00	5611.06
2014-01-27 15:00:00	5677.5
2014-01-27 15:30:00	5735.86
2014-01-27 16:00:00	5774.31
2014-01-27 16:30:00	5800.53
2014-01-27 17:00:00	5979.8
2014-01-27 17:30:00	6108.53
2014-01-27 18:00:00	6202.57
2014-01-27 18:30:00	6134.72
2014-01-27 19:00:00	6167.2
2014-01-27 19:30:00	6190.18
2014-01-27 20:00:00	6101.91
2014-01-27 20:30:00	6043.41
2014-01-27 21:00:00	5957.5
2014-01-27 21:30:00	5974.95
2014-01-27 22:00:00	5823.68
2014-01-27 22:30:00	5623.22
2014-01-27 23:00:00	5497.07
2014-01-27 23:30:00	5459.21
2014-01-28	5275.39
2014-01-28 00:30:00	5128.04
2014-01-28 01:00:00	4907.76
2014-01-28 01:30:00	4747.69
2014-01-28 02:00:00	4647.17
2014-01-28 02:30:00	4627.62
2014-01-28 03:00:00	4614.56
2014-01-28 03:30:00	4587.52
2014-01-28 04:00:00	4599.29
2014-01-28 04:30:00	4637.67
2014-01-28 05:00:00	4736.85
2014-01-28 05:30:00	4878.98
2014-01-28 06:00:00	5060.95
2014-01-28 06:30:00	5436.94
2014-01-28 07:00:00	5812.42
2014-01-28 07:30:00	6100.9
2014-01-28 08:00:00	6232.92
2014-01-28 08:30:00	6264.13
2014-01-28 09:00:00	6258.25
2014-01-28 09:30:00	6305.93
2014-01-28 10:00:00	6324.15
2014-01-28 10:30:00	6277.12
2014-01-28 11:00:00	6216.94
2014-01-28 11:30:00	6201.75
2014-01-28 12:00:00	6222.95
2014-01-28 12:30:00	6194.17
2014-01-28 13:00:00	6240.51
2014-01-28 13:30:00	6222.9
2014-01-28 14:00:00	6276.6
2014-01-28 14:30:00	6366.68
2014-01-28 15:00:00	6405.36
2014-01-28 15:30:00	6367.21
2014-01-28 16:00:00	6419.72
2014-01-28 16:30:00	6485.96
2014-01-28 17:00:00	6582.24
2014-01-28 17:30:00	6571.04
2014-01-28 18:00:00	6520.15
2014-01-28 18:30:00	6426.7
2014-01-28 19:00:00	6404.14
2014-01-28 19:30:00	6459.66
2014-01-28 20:00:00	6372.66
2014-01-28 20:30:00	6314.89
2014-01-28 21:00:00	6181.56
2014-01-28 21:30:00	6223.1
2014-01-28 22:00:00	5992.91
2014-01-28 22:30:00	5746.46
2014-01-28 23:00:00	5589.44
2014-01-28 23:30:00	5507.64
2014-01-29	5319.79
2014-01-29 00:30:00	5117.06
2014-01-29 01:00:00	4937.68
2014-01-29 01:30:00	4738.59
2014-01-29 02:00:00	4633.24
2014-01-29 02:30:00	4643.12
2014-01-29 03:00:00	4583.82
2014-01-29 03:30:00	4554.73
2014-01-29 04:00:00	4573.53
2014-01-29 04:30:00	4612.66
2014-01-29 05:00:00	4710.08
2014-01-29 05:30:00	4866.44
2014-01-29 06:00:00	4997.78
2014-01-29 06:30:00	5352.18
2014-01-29 07:00:00	5719.07
2014-01-29 07:30:00	6022.97
2014-01-29 08:00:00	6186.36
2014-01-29 08:30:00	6186.16
2014-01-29 09:00:00	6107.53
2014-01-29 09:30:00	6179.54
2014-01-29 10:00:00	6196.01
2014-01-29 10:30:00	6128.48
2014-01-29 11:00:00	6146.94
2014-01-29 11:30:00	6127
2014-01-29 12:00:00	6232.39
2014-01-29 12:30:00	6205.77
2014-01-29 13:00:00	6186.11
2014-01-29 13:30:00	6240.64
2014-01-29 14:00:00	6265.9
2014-01-29 14:30:00	6323.19
2014-01-29 15:00:00	6394.94
2014-01-29 15:30:00	6378.58
2014-01-29 16:00:00	6375.57
2014-01-29 16:30:00	6489.59
2014-01-29 17:00:00	6553.78
2014-01-29 17:30:00	6575.12
2014-01-29 18:00:00	6478.93
2014-01-29 18:30:00	6410.74
2014-01-29 19:00:00	6429.03
2014-01-29 19:30:00	6458.08
2014-01-29 20:00:00	6415.47
2014-01-29 20:30:00	6324.18
2014-01-29 21:00:00	6224.92
2014-01-29 21:30:00	6213.71
2014-01-29 22:00:00	5986.09
2014-01-29 22:30:00	5729.63
2014-01-29 23:00:00	5574.77
2014-01-29 23:30:00	5497.72
2014-01-30	5331.52
2014-01-30 00:30:00	5099.54
2014-01-30 01:00:00	4890.81
2014-01-30 01:30:00	4757.07
2014-01-30 02:00:00	4635.19
2014-01-30 02:30:00	4601.6
2014-01-30 03:00:00	4569.39
2014-01-30 03:30:00	4546.63
2014-01-30 04:00:00	4550.97
2014-01-30 04:30:00	4604.25
2014-01-30 05:00:00	4679.59
2014-01-30 05:30:00	4868.89
2014-01-30 06:00:00	5038.01
2014-01-30 06:30:00	5385.53
2014-01-30 07:00:00	5734.24
2014-01-30 07:30:00	6059.46
2014-01-30 08:00:00	6143.66
2014-01-30 08:30:00	6173.49
2014-01-30 09:00:00	6183.2
2014-01-30 09:30:00	6230.95
2014-01-30 10:00:00	6207.49
2014-01-30 10:30:00	6151.45
2014-01-30 11:00:00	6160.22
2014-01-30 11:30:00	6159.03
2014-01-30 12:00:00	6183.13
2014-01-30 12:30:00	6227.06
2014-01-30 13:00:00	6253.35
2014-01-30 13:30:00	6275.52
2014-01-30 14:00:00	6315.63
2014-01-30 14:30:00	6291.49
2014-01-30 15:00:00	6271.01
2014-01-30 15:30:00	6257.06
2014-01-30 16:00:00	6246.23
2014-01-30 16:30:00	6311.91
2014-01-30 17:00:00	6390.48
2014-01-30 17:30:00	6369.88
2014-01-30 18:00:00	6391.72
2014-01-30 18:30:00	6352.17
2014-01-30 19:00:00	6383.08
2014-01-30 19:30:00	6393.34
2014-01-30 20:00:00	6332.1
2014-01-30 20:30:00	6269.34
2014-01-30 21:00:00	6123.03
2014-01-30 21:30:00	6073.46
2014-01-30 22:00:00	5825.29
2014-01-30 22:30:00	5585.51
2014-01-30 23:00:00	5468.91
2014-01-30 23:30:00	5403.48
2014-01-31	5211.08
2014-01-31 00:30:00	5024.98
2014-01-31 01:00:00	4798.12
2014-01-31 01:30:00	4594.11
2014-01-31 02:00:00	4515.02
2014-01-31 02:30:00	4458.42
2014-01-31 03:00:00	4459.31
2014-01-31 03:30:00	4476.57
2014-01-31 04:00:00	4476.63
2014-01-31 04:30:00	4526.43
2014-01-31 05:00:00	4600.49
2014-01-31 05:30:00	4762.84
2014-01-31 06:00:00	4926.31
2014-01-31 06:30:00	5279.67
2014-01-31 07:00:00	5663.71
2014-01-31 07:30:00	6002.7
2014-01-31 08:00:00	6103.46
2014-01-31 08:30:00	6133.01
2014-01-31 09:00:00	6121.09
2014-01-31 09:30:00	6187.35
2014-01-31 10:00:00	6192.4
2014-01-31 10:30:00	6180.54
2014-01-31 11:00:00	6148.6
2014-01-31 11:30:00	6137.13
2014-01-31 12:00:00	6185.15
2014-01-31 12:30:00	6182.79
2014-01-31 13:00:00	6154.66
2014-01-31 13:30:00	6146.28
2014-01-31 14:00:00	6130.57
2014-01-31 14:30:00	6184.15
2014-01-31 15:00:00	6191.08
2014-01-31 15:30:00	6155.57
2014-01-31 16:00:00	6193.4
2014-01-31 16:30:00	6252.73
2014-01-31 17:00:00	6289.47
2014-01-31 17:30:00	6305.83
2014-01-31 18:00:00	6260.02
2014-01-31 18:30:00	6152.48
2014-01-31 19:00:00	6201.9
2014-01-31 19:30:00	6185.7
2014-01-31 20:00:00	6143.15
2014-01-31 20:30:00	6064.63
2014-01-31 21:00:00	5988.43
2014-01-31 21:30:00	6006.49
2014-01-31 22:00:00	5884.52
2014-01-31 22:30:00	5688.36
2014-01-31 23:00:00	5599.48
2014-01-31 23:30:00	5532.96
2014-02-01	5320.56

## Sheet: QLD-Apr
SETTLEMENTDATE	TOTALDEMAND
2014-04-01 00:30:00	5230.99
2014-04-01 01:00:00	4993.43
2014-04-01 01:30:00	4797.8
2014-04-01 02:00:00	4723.29
2014-04-01 02:30:00	4686.96
2014-04-01 03:00:00	4680.39
2014-04-01 03:30:00	4665.58
2014-04-01 04:00:00	4673.1
2014-04-01 04:30:00	4749.25
2014-04-01 05:00:00	4810.41
2014-04-01 05:30:00	5008.3
2014-04-01 06:00:00	5244.17
2014-04-01 06:30:00	5541.25
2014-04-01 07:00:00	5879.36
2014-04-01 07:30:00	6176.9
2014-04-01 08:00:00	6292.89
2014-04-01 08:30:00	6313.09
2014-04-01 09:00:00	6299.81
2014-04-01 09:30:00	6333.43
2014-04-01 10:00:00	6268.47
2014-04-01 10:30:00	6306.2
2014-04-01 11:00:00	6334.57
2014-04-01 11:30:00	6307.69
2014-04-01 12:00:00	6335.24
2014-04-01 12:30:00	6334.66
2014-04-01 13:00:00	6376.95
2014-04-01 13:30:00	6437.61
2014-04-01 14:00:00	6492.72
2014-04-01 14:30:00	6572.55
2014-04-01 15:00:00	6623.89
2014-04-01 15:30:00	6670.51
2014-04-01 16:00:00	6727.2
2014-04-01 16:30:00	6818.02
2014-04-01 17:00:00	6862.1
2014-04-01 17:30:00	6851.46
2014-04-01 18:00:00	6889.27
2014-04-01 18:30:00	6925.55
2014-04-01 19:00:00	6880.63
2014-04-01 19:30:00	6647.65
2014-04-01 20:00:00	6500.9
2014-04-01 20:30:00	6388.47
2014-04-01 21:00:00	6283.49
2014-04-01 21:30:00	6245.89
2014-04-01 22:00:00	6051.59
2014-04-01 22:30:00	5802.44
2014-04-01 23:00:00	5623.59
2014-04-01 23:30:00	5555.04
2014-04-02	5395.54
2014-04-02 00:30:00	5153.78
2014-04-02 01:00:00	4982.18
2014-04-02 01:30:00	4776.85
2014-04-02 02:00:00	4704.95
2014-04-02 02:30:00	4696.59
2014-04-02 03:00:00	4609.25
2014-04-02 03:30:00	4606.06
2014-04-02 04:00:00	4620.24
2014-04-02 04:30:00	4696.73
2014-04-02 05:00:00	4772.64
2014-04-02 05:30:00	4945.22
2014-04-02 06:00:00	5136.51
2014-04-02 06:30:00	5479.35
2014-04-02 07:00:00	5772.84
2014-04-02 07:30:00	6049.77
2014-04-02 08:00:00	6179.5
2014-04-02 08:30:00	6174.2
2014-04-02 09:00:00	6164.09
2014-04-02 09:30:00	6175.76
2014-04-02 10:00:00	6171.37
2014-04-02 10:30:00	6204.46
2014-04-02 11:00:00	6199.56
2014-04-02 11:30:00	6212.53
2014-04-02 12:00:00	6217.24
2014-04-02 12:30:00	6244.45
2014-04-02 13:00:00	6334.23
2014-04-02 13:30:00	6366.85
2014-04-02 14:00:00	6444.88
2014-04-02 14:30:00	6484.46
2014-04-02 15:00:00	6564.96
2014-04-02 15:30:00	6594.34
2014-04-02 16:00:00	6670.99
2014-04-02 16:30:00	6736.55
2014-04-02 17:00:00	6795.17
2014-04-02 17:30:00	6792.78
2014-04-02 18:00:00	6798.81
2014-04-02 18:30:00	6801.24
2014-04-02 19:00:00	6793.75
2014-04-02 19:30:00	6597.09
2014-04-02 20:00:00	6467.28
2014-04-02 20:30:00	6327.87
2014-04-02 21:00:00	6207.34
2014-04-02 21:30:00	6152.76
2014-04-02 22:00:00	5958.79
2014-04-02 22:30:00	5727.19
2014-04-02 23:00:00	5575.06
2014-04-02 23:30:00	5503.75
2014-04-03	5322.06
2014-04-03 00:30:00	5134.65
2014-04-03 01:00:00	4933.84
2014-04-03 01:30:00	4696.66
2014-04-03 02:00:00	4599.66
2014-04-03 02:30:00	4569.19
2014-04-03 03:00:00	4528.81
2014-04-03 03:30:00	4543.13
2014-04-03 04:00:00	4523.48
2014-04-03 04:30:00	4582.24
2014-04-03 05:00:00	4672.39
2014-04-03 05:30:00	4849.55
2014-04-03 06:00:00	5071.74
2014-04-03 06:30:00	5398.2
2014-04-03 07:00:00	5697.49
2014-04-03 07:30:00	6016.69
2014-04-03 08:00:00	6081.51
2014-04-03 08:30:00	6059.74
2014-04-03 09:00:00	6082.91
2014-04-03 09:30:00	6133.93
2014-04-03 10:00:00	6129.91
2014-04-03 10:30:00	6105.61
2014-04-03 11:00:00	6112.59
2014-04-03 11:30:00	6158.56
2014-04-03 12:00:00	6190.79
2014-04-03 12:30:00	6219.45
2014-04-03 13:00:00	6251.13
2014-04-03 13:30:00	6335
2014-04-03 14:00:00	6414.04
2014-04-03 14:30:00	6507.9
2014-04-03 15:00:00	6514.95
2014-04-03 15:30:00	6541.35
2014-04-03 16:00:00	6663.16
2014-04-03 16:30:00	6697.85
2014-04-03 17:00:00	6776.71
2014-04-03 17:30:00	6771.42
2014-04-03 18:00:00	6830.45
2014-04-03 18:30:00	6903.03
2014-04-03 19:00:00	6888.16
2014-04-03 19:30:00	6724.85
2014-04-03 20:00:00	6586.03
2014-04-03 20:30:00	6482.01
2014-04-03 21:00:00	6367.06
2014-04-03 21:30:00	6295.79
2014-04-03 22:00:00	6057.94
2014-04-03 22:30:00	5788.46
2014-04-03 23:00:00	5659.42
2014-04-03 23:30:00	5576.31
2014-04-04	5442.75
2014-04-04 00:30:00	5224.44
2014-04-04 01:00:00	5025.95
2014-04-04 01:30:00	4806.04
2014-04-04 02:00:00	4697.79
2014-04-04 02:30:00	4686.29
2014-04-04 03:00:00	4653.23
2014-04-04 03:30:00	4678.22
2014-04-04 04:00:00	4704.41
2014-04-04 04:30:00	4753.56
2014-04-04 05:00:00	4797.86
2014-04-04 05:30:00	5035.26
2014-04-04 06:00:00	5228.23
2014-04-04 06:30:00	5602.99
2014-04-04 07:00:00	5887.37
2014-04-04 07:30:00	6139.4
2014-04-04 08:00:00	6228.55
2014-04-04 08:30:00	6298.56
2014-04-04 09:00:00	6282.07
2014-04-04 09:30:00	6397.41
2014-04-04 10:00:00	6412.12
2014-04-04 10:30:00	6405.37
2014-04-04 11:00:00	6412.25
2014-04-04 11:30:00	6445.12
2014-04-04 12:00:00	6483.89
2014-04-04 12:30:00	6518.98
2014-04-04 13:00:00	6564.08
2014-04-04 13:30:00	6572.04
2014-04-04 14:00:00	6600.73
2014-04-04 14:30:00	6631.17
2014-04-04 15:00:00	6673.99
2014-04-04 15:30:00	6670.11
2014-04-04 16:00:00	6757.07
2014-04-04 16:30:00	6780.65
2014-04-04 17:00:00	6861.13
2014-04-04 17:30:00	6837.71
2014-04-04 18:00:00	6784.24
2014-04-04 18:30:00	6827.57
2014-04-04 19:00:00	6754.64
2014-04-04 19:30:00	6600.94
2014-04-04 20:00:00	6481.6
2014-04-04 20:30:00	6388.78
2014-04-04 21:00:00	6289.51
2014-04-04 21:30:00	6221.91
2014-04-04 22:00:00	6057.91
2014-04-04 22:30:00	5886.06
2014-04-04 23:00:00	5783.59
2014-04-04 23:30:00	5673.19
2014-04-05	5505.32
2014-04-05 00:30:00	5290.55
2014-04-05 01:00:00	5122.07
2014-04-05 01:30:00	4926.85
2014-04-05 02:00:00	4818.07
2014-04-05 02:30:00	4793.2
2014-04-05 03:00:00	4724.09
2014-04-05 03:30:00	4730.33
2014-04-05 04:00:00	4733.92
2014-04-05 04:30:00	4748.77
2014-04-05 05:00:00	4811.11
2014-04-05 05:30:00	4854.11
2014-04-05 06:00:00	4958.72
2014-04-05 06:30:00	5036.86
2014-04-05 07:00:00	5152.7
2014-04-05 07:30:00	5358.99
2014-04-05 08:00:00	5470.81
2014-04-05 08:30:00	5588.51
2014-04-05 09:00:00	5693.07
2014-04-05 09:30:00	5835.67
2014-04-05 10:00:00	5793.67
2014-04-05 10:30:00	5767.55
2014-04-05 11:00:00	5749.18
2014-04-05 11:30:00	5700.49
2014-04-05 12:00:00	5737.38
2014-04-05 12:30:00	5763.29
2014-04-05 13:00:00	5747.87
2014-04-05 13:30:00	5831.46
2014-04-05 14:00:00	5874.31
2014-04-05 14:30:00	5910.25
2014-04-05 15:00:00	6002.84
2014-04-05 15:30:00	6021.26
2014-04-05 16:00:00	6126.49
2014-04-05 16:30:00	6233.19
2014-04-05 17:00:00	6387.11
2014-04-05 17:30:00	6418.08
2014-04-05 18:00:00	6503.09
2014-04-05 18:30:00	6555.25
2014-04-05 19:00:00	6516.08
2014-04-05 19:30:00	6307.21
2014-04-05 20:00:00	6184.74
2014-04-05 20:30:00	6119.08
2014-04-05 21:00:00	6078.24
2014-04-05 21:30:00	6065.53
2014-04-05 22:00:00	5930.13
2014-04-05 22:30:00	5773.7
2014-04-05 23:00:00	5645.22
2014-04-05 23:30:00	5584.01
2014-04-06	5414.25
2014-04-06 00:30:00	5263.88
2014-04-06 01:00:00	5101.64
2014-04-06 01:30:00	4913.24
2014-04-06 02:00:00	4816.71
2014-04-06 02:30:00	4743.08
2014-04-06 03:00:00	4725.67
2014-04-06 03:30:00	4696.11
2014-04-06 04:00:00	4661.86
2014-04-06 04:30:00	4649.85
2014-04-06 05:00:00	4700.17
2014-04-06 05:30:00	4741.33
2014-04-06 06:00:00	4841.8
2014-04-06 06:30:00	4834.53
2014-04-06 07:00:00	4891.36
2014-04-06 07:30:00	5064.16
2014-04-06 08:00:00	5148.58
2014-04-06 08:30:00	5265.92
2014-04-06 09:00:00	5364.67
2014-04-06 09:30:00	5462.62
2014-04-06 10:00:00	5481.25
2014-04-06 10:30:00	5529.14
2014-04-06 11:00:00	5559.93
2014-04-06 11:30:00	5548.11
2014-04-06 12:00:00	5600.7
2014-04-06 12:30:00	5651.19
2014-04-06 13:00:00	5773.16
2014-04-06 13:30:00	5876.26
2014-04-06 14:00:00	5980.92
2014-04-06 14:30:00	6085.35
2014-04-06 15:00:00	6124.7
2014-04-06 15:30:00	6152.1
2014-04-06 16:00:00	6216.5
2014-04-06 16:30:00	6325.45
2014-04-06 17:00:00	6375.42
2014-04-06 17:30:00	6425.6
2014-04-06 18:00:00	6518.7
2014-04-06 18:30:00	6594.58
2014-04-06 19:00:00	6511.27
2014-04-06 19:30:00	6293.5
2014-04-06 20:00:00	6147.05
2014-04-06 20:30:00	6069.19
2014-04-06 21:00:00	6030.63
2014-04-06 21:30:00	6010.41
2014-04-06 22:00:00	5864.68
2014-04-06 22:30:00	5676.54
2014-04-06 23:00:00	5575.82
2014-04-06 23:30:00	5494.18
2014-04-07	5320.46
2014-04-07 00:30:00	5133.32
2014-04-07 01:00:00	4989.83
2014-04-07 01:30:00	4826.55
2014-04-07 02:00:00	4767.32
2014-04-07 02:30:00	4705.29
2014-04-07 03:00:00	4690.23
2014-04-07 03:30:00	4663.83
2014-04-07 04:00:00	4646.9
2014-04-07 04:30:00	4724.22
2014-04-07 05:00:00	4821.15
2014-04-07 05:30:00	5013.09
2014-04-07 06:00:00	5217.31
2014-04-07 06:30:00	5476.12
2014-04-07 07:00:00	5770.53
2014-04-07 07:30:00	6047.32
2014-04-07 08:00:00	6153.11
2014-04-07 08:30:00	6243.78
2014-04-07 09:00:00	6250.91
2014-04-07 09:30:00	6290.17
2014-04-07 10:00:00	6251.86
2014-04-07 10:30:00	6243.8
2014-04-07 11:00:00	6264.81
2014-04-07 11:30:00	6257.96
2014-04-07 12:00:00	6273.29
2014-04-07 12:30:00	6309.05
2014-04-07 13:00:00	6384.67
2014-04-07 13:30:00	6419.25
2014-04-07 14:00:00	6433.65
2014-04-07 14:30:00	6505.15
2014-04-07 15:00:00	6514.36
2014-04-07 15:30:00	6569.12
2014-04-07 16:00:00	6556.68
2014-04-07 16:30:00	6598.73
2014-04-07 17:00:00	6693.42
2014-04-07 17:30:00	6735.54
2014-04-07 18:00:00	6816.31
2014-04-07 18:30:00	6812.79
2014-04-07 19:00:00	6725.25
2014-04-07 19:30:00	6440.82
2014-04-07 20:00:00	6295.8
2014-04-07 20:30:00	6136.28
2014-04-07 21:00:00	6082.18
2014-04-07 21:30:00	6100.28
2014-04-07 22:00:00	5937.75
2014-04-07 22:30:00	5731.72
2014-04-07 23:00:00	5603.65
2014-04-07 23:30:00	5495.1
2014-04-08	5305.28
2014-04-08 00:30:00	5163.89
2014-04-08 01:00:00	4979.15
2014-04-08 01:30:00	4785.84
2014-04-08 02:00:00	4676.95
2014-04-08 02:30:00	4596.67
2014-04-08 03:00:00	4608.26
2014-04-08 03:30:00	4598.35
2014-04-08 04:00:00	4637.21
2014-04-08 04:30:00	4654.24
2014-04-08 05:00:00	4693.84
2014-04-08 05:30:00	4865.11
2014-04-08 06:00:00	5055.17
2014-04-08 06:30:00	5317.66
2014-04-08 07:00:00	5588.19
2014-04-08 07:30:00	5791.35
2014-04-08 08:00:00	5909.85
2014-04-08 08:30:00	5965.62
2014-04-08 09:00:00	5952.96
2014-04-08 09:30:00	5912.59
2014-04-08 10:00:00	5879.19
2014-04-08 10:30:00	5951.29
2014-04-08 11:00:00	6022.61
2014-04-08 11:30:00	6067.03
2014-04-08 12:00:00	6108.14
2014-04-08 12:30:00	6115.07
2014-04-08 13:00:00	6147.8
2014-04-08 13:30:00	6168.38
2014-04-08 14:00:00	6225.92
2014-04-08 14:30:00	6288.21
2014-04-08 15:00:00	6308.3
2014-04-08 15:30:00	6282.49
2014-04-08 16:00:00	6305.02
2014-04-08 16:30:00	6396
2014-04-08 17:00:00	6547.31
2014-04-08 17:30:00	6629.58
2014-04-08 18:00:00	6750.02
2014-04-08 18:30:00	6752.59
2014-04-08 19:00:00	6640.55
2014-04-08 19:30:00	6395.73
2014-04-08 20:00:00	6278.8
2014-04-08 20:30:00	6204.91
2014-04-08 21:00:00	6117.26
2014-04-08 21:30:00	6148.76
2014-04-08 22:00:00	5904.37
2014-04-08 22:30:00	5688.87
2014-04-08 23:00:00	5572.53
2014-04-08 23:30:00	5496.99
2014-04-09	5348.14
2014-04-09 00:30:00	5176.75
2014-04-09 01:00:00	5013.56
2014-04-09 01:30:00	4768.43
2014-04-09 02:00:00	4692.83
2014-04-09 02:30:00	4619.03
2014-04-09 03:00:00	4587.01
2014-04-09 03:30:00	4614.51
2014-04-09 04:00:00	4614.39
2014-04-09 04:30:00	4646.48
2014-04-09 05:00:00	4749.5
2014-04-09 05:30:00	4889.04
2014-04-09 06:00:00	5105.01
2014-04-09 06:30:00	5415.8
2014-04-09 07:00:00	5654.53
2014-04-09 07:30:00	5871.01
2014-04-09 08:00:00	5936.74
2014-04-09 08:30:00	6003.12
2014-04-09 09:00:00	6054.21
2014-04-09 09:30:00	6052.22
2014-04-09 10:00:00	6042.46
2014-04-09 10:30:00	6081.09
2014-04-09 11:00:00	6040.53
2014-04-09 11:30:00	6079.54
2014-04-09 12:00:00	6093.53
2014-04-09 12:30:00	5945.46
2014-04-09 13:00:00	5908.5
2014-04-09 13:30:00	6206.64
2014-04-09 14:00:00	6221.97
2014-04-09 14:30:00	6264.24
2014-04-09 15:00:00	6237.51
2014-04-09 15:30:00	6260.72
2014-04-09 16:00:00	6366.97
2014-04-09 16:30:00	6436.49
2014-04-09 17:00:00	6546.6
2014-04-09 17:30:00	6342.3
2014-04-09 18:00:00	6637.69
2014-04-09 18:30:00	6777.49
2014-04-09 19:00:00	6629.43
2014-04-09 19:30:00	6445.42
2014-04-09 20:00:00	6272.32
2014-04-09 20:30:00	6187.14
2014-04-09 21:00:00	6087.04
2014-04-09 21:30:00	6083.24
2014-04-09 22:00:00	5910.23
2014-04-09 22:30:00	5692.96
2014-04-09 23:00:00	5542.09
2014-04-09 23:30:00	5492.83
2014-04-10	5327.5
2014-04-10 00:30:00	5151.18
2014-04-10 01:00:00	4972.94
2014-04-10 01:30:00	4798.06
2014-04-10 02:00:00	4673.22
2014-04-10 02:30:00	4632.57
2014-04-10 03:00:00	4636.33
2014-04-10 03:30:00	4608.59
2014-04-10 04:00:00	4603.09
2014-04-10 04:30:00	4659.73
2014-04-10 05:00:00	4751.4
2014-04-10 05:30:00	4948.99
2014-04-10 06:00:00	5115.28
2014-04-10 06:30:00	5385.96
2014-04-10 07:00:00	5634.66
2014-04-10 07:30:00	5884.74
2014-04-10 08:00:00	5965.56
2014-04-10 08:30:00	6010.35
2014-04-10 09:00:00	6039.1
2014-04-10 09:30:00	6031.49
2014-04-10 10:00:00	5947.75
2014-04-10 10:30:00	6052.35
2014-04-10 11:00:00	6107.59
2014-04-10 11:30:00	6134.94
2014-04-10 12:00:00	6127.24
2014-04-10 12:30:00	6157.75
2014-04-10 13:00:00	6224.91
2014-04-10 13:30:00	6258.78
2014-04-10 14:00:00	6296.23
2014-04-10 14:30:00	6284.05
2014-04-10 15:00:00	6333.15
2014-04-10 15:30:00	6338.29
2014-04-10 16:00:00	6390.75
2014-04-10 16:30:00	6460.55
2014-04-10 17:00:00	6533.49
2014-04-10 17:30:00	6622.51
2014-04-10 18:00:00	6785.64
2014-04-10 18:30:00	6873.74
2014-04-10 19:00:00	6763.73
2014-04-10 19:30:00	6567.15
2014-04-10 20:00:00	6397.12
2014-04-10 20:30:00	6251.64
2014-04-10 21:00:00	6053.85
2014-04-10 21:30:00	6048.04
2014-04-10 22:00:00	5906.39
2014-04-10 22:30:00	5684.03
2014-04-10 23:00:00	5588.25
2014-04-10 23:30:00	5521.12
2014-04-11	5388.19
2014-04-11 00:30:00	5252.24
2014-04-11 01:00:00	5018.71
2014-04-11 01:30:00	4821.7
2014-04-11 02:00:00	4728.92
2014-04-11 02:30:00	4635.31
2014-04-11 03:00:00	4505.62
2014-04-11 03:30:00	4515.65
2014-04-11 04:00:00	4560.48
2014-04-11 04:30:00	4587.18
2014-04-11 05:00:00	4707.17
2014-04-11 05:30:00	4921.82
2014-04-11 06:00:00	5132.94
2014-04-11 06:30:00	5427.23
2014-04-11 07:00:00	5662.4
2014-04-11 07:30:00	5949.3
2014-04-11 08:00:00	6017.5
2014-04-11 08:30:00	6065.61
2014-04-11 09:00:00	6091.51
2014-04-11 09:30:00	6123.87
2014-04-11 10:00:00	6054.07
2014-04-11 10:30:00	6078.04
2014-04-11 11:00:00	6059.71
2014-04-11 11:30:00	6088.55
2014-04-11 12:00:00	6133.5
2014-04-11 12:30:00	6156.04
2014-04-11 13:00:00	6220.88
2014-04-11 13:30:00	6271.25
2014-04-11 14:00:00	6389.38
2014-04-11 14:30:00	6456.23
2014-04-11 15:00:00	6509.36
2014-04-11 15:30:00	6552.24
2014-04-11 16:00:00	6648.22
2014-04-11 16:30:00	6741
2014-04-11 17:00:00	6795.62
2014-04-11 17:30:00	6800.63
2014-04-11 18:00:00	6790.55
2014-04-11 18:30:00	6818.07
2014-04-11 19:00:00	6698.06
2014-04-11 19:30:00	6500.21
2014-04-11 20:00:00	6382.36
2014-04-11 20:30:00	6278.25
2014-04-11 21:00:00	6193.27
2014-04-11 21:30:00	6189.75
2014-04-11 22:00:00	6024.59
2014-04-11 22:30:00	5852.97
2014-04-11 23:00:00	5754.6
2014-04-11 23:30:00	5678.58
2014-04-12	5521.34
2014-04-12 00:30:00	5327.63
2014-04-12 01:00:00	5117.09
2014-04-12 01:30:00	4919.24
2014-04-12 02:00:00	4786.39
2014-04-12 02:30:00	4688.3
2014-04-12 03:00:00	4714.22
2014-04-12 03:30:00	4681.81
2014-04-12 04:00:00	4649.13
2014-04-12 04:30:00	4684.55
2014-04-12 05:00:00	4726.03
2014-04-12 05:30:00	4783.4
2014-04-12 06:00:00	4844.68
2014-04-12 06:30:00	4970.74
2014-04-12 07:00:00	5123.96
2014-04-12 07:30:00	5330.96
2014-04-12 08:00:00	5450.67
2014-04-12 08:30:00	5589.07
2014-04-12 09:00:00	5656.57
2014-04-12 09:30:00	5695.31
2014-04-12 10:00:00	5698.31
2014-04-12 10:30:00	5712.11
2014-04-12 11:00:00	5726.83
2014-04-12 11:30:00	5755.92
2014-04-12 12:00:00	5820.88
2014-04-12 12:30:00	5853.16
2014-04-12 13:00:00	5940.88
2014-04-12 13:30:00	5970.96
2014-04-12 14:00:00	6005.24
2014-04-12 14:30:00	6038.66
2014-04-12 15:00:00	6040.57
2014-04-12 15:30:00	6050.69
2014-04-12 16:00:00	6105.67
2014-04-12 16:30:00	6228.57
2014-04-12 17:00:00	6379.87
2014-04-12 17:30:00	6431.06
2014-04-12 18:00:00	6555.74
2014-04-12 18:30:00	6620.85
2014-04-12 19:00:00	6491.24
2014-04-12 19:30:00	6344.27
2014-04-12 20:00:00	6198.35
2014-04-12 20:30:00	6112.87
2014-04-12 21:00:00	6059.64
2014-04-12 21:30:00	6084.98
2014-04-12 22:00:00	5950.42
2014-04-12 22:30:00	5787.3
2014-04-12 23:00:00	5661.12
2014-04-12 23:30:00	5556.77
2014-04-13	5416
2014-04-13 00:30:00	5253.36
2014-04-13 01:00:00	5059.05
2014-04-13 01:30:00	4874.38
2014-04-13 02:00:00	4762.37
2014-04-13 02:30:00	4712.26
2014-04-13 03:00:00	4714.52
2014-04-13 03:30:00	4689.4
2014-04-13 04:00:00	4679.75
2014-04-13 04:30:00	4695.27
2014-04-13 05:00:00	4687.24
2014-04-13 05:30:00	4738.79
2014-04-13 06:00:00	4791.02
2014-04-13 06:30:00	4825.75
2014-04-13 07:00:00	4897.94
2014-04-13 07:30:00	5106.31
2014-04-13 08:00:00	5168.79
2014-04-13 08:30:00	5377.81
2014-04-13 09:00:00	5458.42
2014-04-13 09:30:00	5603.15
2014-04-13 10:00:00	5667.53
2014-04-13 10:30:00	5739.59
2014-04-13 11:00:00	5694.91
2014-04-13 11:30:00	5714.59
2014-04-13 12:00:00	5726.91
2014-04-13 12:30:00	5704.29
2014-04-13 13:00:00	5694.84
2014-04-13 13:30:00	5685.66
2014-04-13 14:00:00	5649.47
2014-04-13 14:30:00	5699.03
2014-04-13 15:00:00	5694.75
2014-04-13 15:30:00	5692.75
2014-04-13 16:00:00	5759.06
2014-04-13 16:30:00	5833.69
2014-04-13 17:00:00	5909.35
2014-04-13 17:30:00	6065.5
2014-04-13 18:00:00	6257.13
2014-04-13 18:30:00	6267.57
2014-04-13 19:00:00	6100.62
2014-04-13 19:30:00	5862.13
2014-04-13 20:00:00	5734.76
2014-04-13 20:30:00	5667.58
2014-04-13 21:00:00	5621.72
2014-04-13 21:30:00	5653.43
2014-04-13 22:00:00	5471.49
2014-04-13 22:30:00	5304.45
2014-04-13 23:00:00	5210.78
2014-04-13 23:30:00	5162.29
2014-04-14	4990.26
2014-04-14 00:30:00	4849.15
2014-04-14 01:00:00	4712.76
2014-04-14 01:30:00	4526.53
2014-04-14 02:00:00	4464.02
2014-04-14 02:30:00	4396.6
2014-04-14 03:00:00	4344.49
2014-04-14 03:30:00	4380.27
2014-04-14 04:00:00	4374.83
2014-04-14 04:30:00	4447.74
2014-04-14 05:00:00	4553.47
2014-04-14 05:30:00	4733.06
2014-04-14 06:00:00	4937.4
2014-04-14 06:30:00	5308.1
2014-04-14 07:00:00	5582.85
2014-04-14 07:30:00	5879.17
2014-04-14 08:00:00	6059.86
2014-04-14 08:30:00	6170.05
2014-04-14 09:00:00	6230.28
2014-04-14 09:30:00	6214.25
2014-04-14 10:00:00	6170.88
2014-04-14 10:30:00	6199.32
2014-04-14 11:00:00	6256.47
2014-04-14 11:30:00	6255.73
2014-04-14 12:00:00	6281.16
2014-04-14 12:30:00	6303.16
2014-04-14 13:00:00	6323.35
2014-04-14 13:30:00	6328.07
2014-04-14 14:00:00	6322.39
2014-04-14 14:30:00	6349.15
2014-04-14 15:00:00	6342.96
2014-04-14 15:30:00	6359.44
2014-04-14 16:00:00	6378.92
2014-04-14 16:30:00	6445.62
2014-04-14 17:00:00	6520.25
2014-04-14 17:30:00	6599.64
2014-04-14 18:00:00	6744.18
2014-04-14 18:30:00	6736.35
2014-04-14 19:00:00	6599.04
2014-04-14 19:30:00	6394.43
2014-04-14 20:00:00	6217.44
2014-04-14 20:30:00	6164.7
2014-04-14 21:00:00	6079.44
2014-04-14 21:30:00	6082.14
2014-04-14 22:00:00	5863.08
2014-04-14 22:30:00	5663.95
2014-04-14 23:00:00	5573.84
2014-04-14 23:30:00	5487.4
2014-04-15	5300.72
2014-04-15 00:30:00	5141.86
2014-04-15 01:00:00	4928.38
2014-04-15 01:30:00	4707.07
2014-04-15 02:00:00	4628.02
2014-04-15 02:30:00	4551.63
2014-04-15 03:00:00	4528
2014-04-15 03:30:00	4523.08
2014-04-15 04:00:00	4519.46
2014-04-15 04:30:00	4571.14
2014-04-15 05:00:00	4645.24
2014-04-15 05:30:00	4848.79
2014-04-15 06:00:00	5041.48
2014-04-15 06:30:00	5340.44
2014-04-15 07:00:00	5607.04
2014-04-15 07:30:00	5846.42
2014-04-15 08:00:00	5906.12
2014-04-15 08:30:00	5977.11
2014-04-15 09:00:00	5959.26
2014-04-15 09:30:00	6015.1
2014-04-15 10:00:00	5992.13
2014-04-15 10:30:00	5995.36
2014-04-15 11:00:00	5970.97
2014-04-15 11:30:00	5960.15
2014-04-15 12:00:00	5978.43
2014-04-15 12:30:00	5953.14
2014-04-15 13:00:00	5993.44
2014-04-15 13:30:00	6054.48
2014-04-15 14:00:00	6125.24
2014-04-15 14:30:00	6145.47
2014-04-15 15:00:00	6178.58
2014-04-15 15:30:00	6193.85
2014-04-15 16:00:00	6243.83
2014-04-15 16:30:00	6271.75
2014-04-15 17:00:00	6445.21
2014-04-15 17:30:00	6466.65
2014-04-15 18:00:00	6594.97
2014-04-15 18:30:00	6612.84
2014-04-15 19:00:00	6478
2014-04-15 19:30:00	6308.41
2014-04-15 20:00:00	6185.02
2014-04-15 20:30:00	6090.08
2014-04-15 21:00:00	6035.56
2014-04-15 21:30:00	6040.97
2014-04-15 22:00:00	5852.67
2014-04-15 22:30:00	5620.95
2014-04-15 23:00:00	5527.73
2014-04-15 23:30:00	5450.37
2014-04-16	5294.28
2014-04-16 00:30:00	5093.84
2014-04-16 01:00:00	4938.6
2014-04-16 01:30:00	4760.9
2014-04-16 02:00:00	4621.2
2014-04-16 02:30:00	4555.47
2014-04-16 03:00:00	4561.33
2014-04-16 03:30:00	4519.56
2014-04-16 04:00:00	4512.8
2014-04-16 04:30:00	4547.5
2014-04-16 05:00:00	4640.94
2014-04-16 05:30:00	4810.47
2014-04-16 06:00:00	5014.64
2014-04-16 06:30:00	5284.22
2014-04-16 07:00:00	5481.7
2014-04-16 07:30:00	5734.09
2014-04-16 08:00:00	5812.55
2014-04-16 08:30:00	5888.61
2014-04-16 09:00:00	5854.17
2014-04-16 09:30:00	5845.42
2014-04-16 10:00:00	5809.36
2014-04-16 10:30:00	5789.49
2014-04-16 11:00:00	5772.41
2014-04-16 11:30:00	5744.17
2014-04-16 12:00:00	5808.72
2014-04-16 12:30:00	5830.61
2014-04-16 13:00:00	5883.25
2014-04-16 13:30:00	5988.21
2014-04-16 14:00:00	6043.82
2014-04-16 14:30:00	6083.97
2014-04-16 15:00:00	6178.52
2014-04-16 15:30:00	6235.06
2014-04-16 16:00:00	6266.7
2014-04-16 16:30:00	6360.01
2014-04-16 17:00:00	6442.58
2014-04-16 17:30:00	6470.68
2014-04-16 18:00:00	6612.44
2014-04-16 18:30:00	6515.77
2014-04-16 19:00:00	6108.42
2014-04-16 19:30:00	6264.42
2014-04-16 20:00:00	6214.24
2014-04-16 20:30:00	6142.65
2014-04-16 21:00:00	6076.63
2014-04-16 21:30:00	6050.64
2014-04-16 22:00:00	5835.1
2014-04-16 22:30:00	5656.33
2014-04-16 23:00:00	5537.65
2014-04-16 23:30:00	5453.99
2014-04-17	5314.36
2014-04-17 00:30:00	5121.5
2014-04-17 01:00:00	4970.38
2014-04-17 01:30:00	4761.48
2014-04-17 02:00:00	4613.64
2014-04-17 02:30:00	4582.9
2014-04-17 03:00:00	4534.87
2014-04-17 03:30:00	4553.07
2014-04-17 04:00:00	4582.73
2014-04-17 04:30:00	4624.93
2014-04-17 05:00:00	4695.28
2014-04-17 05:30:00	4898.89
2014-04-17 06:00:00	5080.5
2014-04-17 06:30:00	5335.87
2014-04-17 07:00:00	5601.6
2014-04-17 07:30:00	5824.81
2014-04-17 08:00:00	5871.73
2014-04-17 08:30:00	5942.14
2014-04-17 09:00:00	5948.38
2014-04-17 09:30:00	5890.2
2014-04-17 10:00:00	5870.83
2014-04-17 10:30:00	5838.3
2014-04-17 11:00:00	5857.48
2014-04-17 11:30:00	5867.36
2014-04-17 12:00:00	5881.11
2014-04-17 12:30:00	5894.33
2014-04-17 13:00:00	5944.02
2014-04-17 13:30:00	6005.39
2014-04-17 14:00:00	6048
2014-04-17 14:30:00	6092.12
2014-04-17 15:00:00	6124.71
2014-04-17 15:30:00	6163.01
2014-04-17 16:00:00	6221.14
2014-04-17 16:30:00	6326.62
2014-04-17 17:00:00	6393.02
2014-04-17 17:30:00	6490.64
2014-04-17 18:00:00	6558.85
2014-04-17 18:30:00	6597.54
2014-04-17 19:00:00	6480.15
2014-04-17 19:30:00	6285.58
2014-04-17 20:00:00	6133.41
2014-04-17 20:30:00	6085.95
2014-04-17 21:00:00	6049.86
2014-04-17 21:30:00	5990.78
2014-04-17 22:00:00	5868.63
2014-04-17 22:30:00	5600.01
2014-04-17 23:00:00	5454.51
2014-04-17 23:30:00	5436.29
2014-04-18	5270.47
2014-04-18 00:30:00	5060.77
2014-04-18 01:00:00	4885.31
2014-04-18 01:30:00	4703.31
2014-04-18 02:00:00	4588.88
2014-04-18 02:30:00	4521.31
2014-04-18 03:00:00	4486.51
2014-04-18 03:30:00	4494.74
2014-04-18 04:00:00	4493.53
2014-04-18 04:30:00	4479.58
2014-04-18 05:00:00	4511.8
2014-04-18 05:30:00	4566.19
2014-04-18 06:00:00	4611.81
2014-04-18 06:30:00	4667.25
2014-04-18 07:00:00	4722.79
2014-04-18 07:30:00	4820.15
2014-04-18 08:00:00	4854.3
2014-04-18 08:30:00	4915
2014-04-18 09:00:00	4930.24
2014-04-18 09:30:00	4936.82
2014-04-18 10:00:00	4939.32
2014-04-18 10:30:00	4903.45
2014-04-18 11:00:00	4829.96
2014-04-18 11:30:00	4820.68
2014-04-18 12:00:00	4853.13
2014-04-18 12:30:00	4843.92
2014-04-18 13:00:00	4844.71
2014-04-18 13:30:00	4848.21
2014-04-18 14:00:00	4853.75
2014-04-18 14:30:00	4918.12
2014-04-18 15:00:00	4957.11
2014-04-18 15:30:00	5050.34
2014-04-18 16:00:00	5150.13
2014-04-18 16:30:00	5312.76
2014-04-18 17:00:00	5499.14
2014-04-18 17:30:00	5644.11
2014-04-18 18:00:00	5867.16
2014-04-18 18:30:00	5912.05
2014-04-18 19:00:00	5803.3
2014-04-18 19:30:00	5652.97
2014-04-18 20:00:00	5533.15
2014-04-18 20:30:00	5488.74
2014-04-18 21:00:00	5459.31
2014-04-18 21:30:00	5508.97
2014-04-18 22:00:00	5379.57
2014-04-18 22:30:00	5304.06
2014-04-18 23:00:00	5210.39
2014-04-18 23:30:00	5163.07
2014-04-19	4986.79
2014-04-19 00:30:00	4851.22
2014-04-19 01:00:00	4700.6
2014-04-19 01:30:00	4539.41
2014-04-19 02:00:00	4443.98
2014-04-19 02:30:00	4391.68
2014-04-19 03:00:00	4313.33
2014-04-19 03:30:00	4300.71
2014-04-19 04:00:00	4279.21
2014-04-19 04:30:00	4324.94
2014-04-19 05:00:00	4363.78
2014-04-19 05:30:00	4404.82
2014-04-19 06:00:00	4470.72
2014-04-19 06:30:00	4472.94
2014-04-19 07:00:00	4657.44
2014-04-19 07:30:00	4854.18
2014-04-19 08:00:00	4900.11
2014-04-19 08:30:00	4969.78
2014-04-19 09:00:00	5039.31
2014-04-19 09:30:00	5033.75
2014-04-19 10:00:00	5031.2
2014-04-19 10:30:00	5014.11
2014-04-19 11:00:00	4923.84
2014-04-19 11:30:00	4912.01
2014-04-19 12:00:00	4896.44
2014-04-19 12:30:00	4889.73
2014-04-19 13:00:00	4906.19
2014-04-19 13:30:00	4921.68
2014-04-19 14:00:00	4972.76
2014-04-19 14:30:00	5071.3
2014-04-19 15:00:00	5191.22
2014-04-19 15:30:00	5265.01
2014-04-19 16:00:00	5388.47
2014-04-19 16:30:00	5518.48
2014-04-19 17:00:00	5719.01
2014-04-19 17:30:00	5808.93
2014-04-19 18:00:00	6019.16
2014-04-19 18:30:00	6026.66
2014-04-19 19:00:00	5855.97
2014-04-19 19:30:00	5638.56
2014-04-19 20:00:00	5540.93
2014-04-19 20:30:00	5488.42
2014-04-19 21:00:00	5497.12
2014-04-19 21:30:00	5514.83
2014-04-19 22:00:00	5436.21
2014-04-19 22:30:00	5254.48
2014-04-19 23:00:00	5213.61
2014-04-19 23:30:00	5158.87
2014-04-20	5028.39
2014-04-20 00:30:00	4908.01
2014-04-20 01:00:00	4745.18
2014-04-20 01:30:00	4565.39
2014-04-20 02:00:00	4480.54
2014-04-20 02:30:00	4374.41
2014-04-20 03:00:00	4363.04
2014-04-20 03:30:00	4355.05
2014-04-20 04:00:00	4308.38
2014-04-20 04:30:00	4334.31
2014-04-20 05:00:00	4344.89
2014-04-20 05:30:00	4392.57
2014-04-20 06:00:00	4426.91
2014-04-20 06:30:00	4499.08
2014-04-20 07:00:00	4574.94
2014-04-20 07:30:00	4715.9
2014-04-20 08:00:00	4725.79
2014-04-20 08:30:00	4788.09
2014-04-20 09:00:00	4820.57
2014-04-20 09:30:00	4843.29
2014-04-20 10:00:00	4794.51
2014-04-20 10:30:00	4788.69
2014-04-20 11:00:00	4718.21
2014-04-20 11:30:00	4701.85
2014-04-20 12:00:00	4730.57
2014-04-20 12:30:00	4737.78
2014-04-20 13:00:00	4752.11
2014-04-20 13:30:00	4804.31
2014-04-20 14:00:00	4805.55
2014-04-20 14:30:00	4871.95
2014-04-20 15:00:00	4965.33
2014-04-20 15:30:00	5030.66
2014-04-20 16:00:00	5165.19
2014-04-20 16:30:00	5316.15
2014-04-20 17:00:00	5449.39
2014-04-20 17:30:00	5617.31
2014-04-20 18:00:00	5819.19
2014-04-20 18:30:00	5888.87
2014-04-20 19:00:00	5805.7
2014-04-20 19:30:00	5670.14
2014-04-20 20:00:00	5575.37
2014-04-20 20:30:00	5529.29
2014-04-20 21:00:00	5482.26
2014-04-20 21:30:00	5501.55
2014-04-20 22:00:00	5359.24
2014-04-20 22:30:00	5259.66
2014-04-20 23:00:00	5211.22
2014-04-20 23:30:00	5179.86
2014-04-21	5034.14
2014-04-21 00:30:00	4835.69
2014-04-21 01:00:00	4623.99
2014-04-21 01:30:00	4482.14
2014-04-21 02:00:00	4403.48
2014-04-21 02:30:00	4382.72
2014-04-21 03:00:00	4324.04
2014-04-21 03:30:00	4318.58
2014-04-21 04:00:00	4331.53
2014-04-21 04:30:00	4333.76
2014-04-21 05:00:00	4342.94
2014-04-21 05:30:00	4414.48
2014-04-21 06:00:00	4452.65
2014-04-21 06:30:00	4564.37
2014-04-21 07:00:00	4590.8
2014-04-21 07:30:00	4778
2014-04-21 08:00:00	4862.48
2014-04-21 08:30:00	4959.75
2014-04-21 09:00:00	5054.98
2014-04-21 09:30:00	5094.95
2014-04-21 10:00:00	5083.21
2014-04-21 10:30:00	5094.64
2014-04-21 11:00:00	5058.67
2014-04-21 11:30:00	5037.3
2014-04-21 12:00:00	5051.03
2014-04-21 12:30:00	5067.49
2014-04-21 13:00:00	5089.3
2014-04-21 13:30:00	5157.26
2014-04-21 14:00:00	5205.72
2014-04-21 14:30:00	5319.64
2014-04-21 15:00:00	5385.02
2014-04-21 15:30:00	5455.8
2014-04-21 16:00:00	5608.09
2014-04-21 16:30:00	5759.45
2014-04-21 17:00:00	5944.42
2014-04-21 17:30:00	6140.58
2014-04-21 18:00:00	6384.22
2014-04-21 18:30:00	6397.33
2014-04-21 19:00:00	6238.24
2014-04-21 19:30:00	5908.52
2014-04-21 20:00:00	5890.62
2014-04-21 20:30:00	5775.6
2014-04-21 21:00:00	5709.07
2014-04-21 21:30:00	5720.36
2014-04-21 22:00:00	5598.61
2014-04-21 22:30:00	5365.56
2014-04-21 23:00:00	5289.85
2014-04-21 23:30:00	5220.24
2014-04-22	5112.04
2014-04-22 00:30:00	4948.45
2014-04-22 01:00:00	4843.76
2014-04-22 01:30:00	4649.46
2014-04-22 02:00:00	4539.65
2014-04-22 02:30:00	4461.42
2014-04-22 03:00:00	4465.66
2014-04-22 03:30:00	4445.5
2014-04-22 04:00:00	4469.81
2014-04-22 04:30:00	4505.72
2014-04-22 05:00:00	4608.95
2014-04-22 05:30:00	4743.57
2014-04-22 06:00:00	4997.82
2014-04-22 06:30:00	5265.62
2014-04-22 07:00:00	5591.41
2014-04-22 07:30:00	5870.83
2014-04-22 08:00:00	5958.65
2014-04-22 08:30:00	5935.85
2014-04-22 09:00:00	5909.23
2014-04-22 09:30:00	5910.43
2014-04-22 10:00:00	5866.84
2014-04-22 10:30:00	5886.33
2014-04-22 11:00:00	5906.32
2014-04-22 11:30:00	5887.2
2014-04-22 12:00:00	5925.54
2014-04-22 12:30:00	5948.81
2014-04-22 13:00:00	5978.15
2014-04-22 13:30:00	6033.43
2014-04-22 14:00:00	6118.23
2014-04-22 14:30:00	6158.98
2014-04-22 15:00:00	6162.87
2014-04-22 15:30:00	6168.47
2014-04-22 16:00:00	6250.36
2014-04-22 16:30:00	6362.51
2014-04-22 17:00:00	6473.92
2014-04-22 17:30:00	6514.04
2014-04-22 18:00:00	6704.11
2014-04-22 18:30:00	6698.03
2014-04-22 19:00:00	6534.6
2014-04-22 19:30:00	6291.03
2014-04-22 20:00:00	6124.49
2014-04-22 20:30:00	6049.99
2014-04-22 21:00:00	5939.4
2014-04-22 21:30:00	5963.76
2014-04-22 22:00:00	5818.82
2014-04-22 22:30:00	5549.56
2014-04-22 23:00:00	5502.85
2014-04-22 23:30:00	5407.52
2014-04-23	5259.7
2014-04-23 00:30:00	5050.59
2014-04-23 01:00:00	4912.24
2014-04-23 01:30:00	4729.15
2014-04-23 02:00:00	4612.88
2014-04-23 02:30:00	4535.61
2014-04-23 03:00:00	4522.18
2014-04-23 03:30:00	4517.53
2014-04-23 04:00:00	4499.3
2014-04-23 04:30:00	4591.75
2014-04-23 05:00:00	4634.92
2014-04-23 05:30:00	4756.4
2014-04-23 06:00:00	5001.73
2014-04-23 06:30:00	5287.67
2014-04-23 07:00:00	5624.35
2014-04-23 07:30:00	5910.43
2014-04-23 08:00:00	5974.09
2014-04-23 08:30:00	5965.25
2014-04-23 09:00:00	5904.41
2014-04-23 09:30:00	5902.76
2014-04-23 10:00:00	5884.24
2014-04-23 10:30:00	5854.81
2014-04-23 11:00:00	5890.5
2014-04-23 11:30:00	5917.98
2014-04-23 12:00:00	5915.07
2014-04-23 12:30:00	5946.89
2014-04-23 13:00:00	6001.71
2014-04-23 13:30:00	6015.97
2014-04-23 14:00:00	6044.02
2014-04-23 14:30:00	6093.64
2014-04-23 15:00:00	6149.3
2014-04-23 15:30:00	6208.84
2014-04-23 16:00:00	6307.28
2014-04-23 16:30:00	6389.49
2014-04-23 17:00:00	6486.2
2014-04-23 17:30:00	6539.49
2014-04-23 18:00:00	6784.68
2014-04-23 18:30:00	6723.85
2014-04-23 19:00:00	6577.01
2014-04-23 19:30:00	6313.24
2014-04-23 20:00:00	6173.87
2014-04-23 20:30:00	6119.98
2014-04-23 21:00:00	6021.99
2014-04-23 21:30:00	6008.41
2014-04-23 22:00:00	5849.32
2014-04-23 22:30:00	5617.93
2014-04-23 23:00:00	5460.09
2014-04-23 23:30:00	5379.81
2014-04-24	5223.28
2014-04-24 00:30:00	5085.17
2014-04-24 01:00:00	4906.77
2014-04-24 01:30:00	4703.49
2014-04-24 02:00:00	4604.51
2014-04-24 02:30:00	4534.49
2014-04-24 03:00:00	4529.62
2014-04-24 03:30:00	4546.66
2014-04-24 04:00:00	4550.1
2014-04-24 04:30:00	4592.98
2014-04-24 05:00:00	4696.23
2014-04-24 05:30:00	4858.47
2014-04-24 06:00:00	5053
2014-04-24 06:30:00	5370.65
2014-04-24 07:00:00	5646.01
2014-04-24 07:30:00	5934.42
2014-04-24 08:00:00	5975.32
2014-04-24 08:30:00	6018.26
2014-04-24 09:00:00	6032.59
2014-04-24 09:30:00	5984.52
2014-04-24 10:00:00	5955.39
2014-04-24 10:30:00	5915.93
2014-04-24 11:00:00	5930.02
2014-04-24 11:30:00	5897.88
2014-04-24 12:00:00	5969.79
2014-04-24 12:30:00	5959.69
2014-04-24 13:00:00	6005.72
2014-04-24 13:30:00	6076.39
2014-04-24 14:00:00	6186.48
2014-04-24 14:30:00	6232.47
2014-04-24 15:00:00	6285.93
2014-04-24 15:30:00	6316.29
2014-04-24 16:00:00	6387.94
2014-04-24 16:30:00	6432.84
2014-04-24 17:00:00	6497.33
2014-04-24 17:30:00	6497.93
2014-04-24 18:00:00	6713.57
2014-04-24 18:30:00	6590.29
2014-04-24 19:00:00	6474.64
2014-04-24 19:30:00	6357.81
2014-04-24 20:00:00	6242.78
2014-04-24 20:30:00	6166.63
2014-04-24 21:00:00	6085.6
2014-04-24 21:30:00	6056.38
2014-04-24 22:00:00	5842.05
2014-04-24 22:30:00	5498.18
2014-04-24 23:00:00	5380.27
2014-04-24 23:30:00	5396.31
2014-04-25	5237.86
2014-04-25 00:30:00	5084.68
2014-04-25 01:00:00	4924.1
2014-04-25 01:30:00	4691.5
2014-04-25 02:00:00	4591.15
2014-04-25 02:30:00	4569.97
2014-04-25 03:00:00	4515.88
2014-04-25 03:30:00	4525.76
2014-04-25 04:00:00	4549.97
2014-04-25 04:30:00	4571.68
2014-04-25 05:00:00	4553.75
2014-04-25 05:30:00	4617.97
2014-04-25 06:00:00	4684.37
2014-04-25 06:30:00	4755.61
2014-04-25 07:00:00	4818.33
2014-04-25 07:30:00	4981.98
2014-04-25 08:00:00	5015.8
2014-04-25 08:30:00	5057.81
2014-04-25 09:00:00	5064.64
2014-04-25 09:30:00	5079.66
2014-04-25 10:00:00	5079.32
2014-04-25 10:30:00	5070.23
2014-04-25 11:00:00	5051.72
2014-04-25 11:30:00	5083.63
2014-04-25 12:00:00	5087.52
2014-04-25 12:30:00	5094.91
2014-04-25 13:00:00	5118.05
2014-04-25 13:30:00	5193.31
2014-04-25 14:00:00	5177.73
2014-04-25 14:30:00	5254.53
2014-04-25 15:00:00	5348.32
2014-04-25 15:30:00	5408.96
2014-04-25 16:00:00	5530.41
2014-04-25 16:30:00	5680.02
2014-04-25 17:00:00	5817.87
2014-04-25 17:30:00	5938.42
2014-04-25 18:00:00	6233.91
2014-04-25 18:30:00	6228.65
2014-04-25 19:00:00	6093.18
2014-04-25 19:30:00	5913.8
2014-04-25 20:00:00	5815.34
2014-04-25 20:30:00	5773.22
2014-04-25 21:00:00	5725.13
2014-04-25 21:30:00	5715.72
2014-04-25 22:00:00	5643.23
2014-04-25 22:30:00	5488.4
2014-04-25 23:00:00	5396.99
2014-04-25 23:30:00	5320.71
2014-04-26	5199.89
2014-04-26 00:30:00	5075.44
2014-04-26 01:00:00	4925.77
2014-04-26 01:30:00	4757.73
2014-04-26 02:00:00	4647.21
2014-04-26 02:30:00	4574.09
2014-04-26 03:00:00	4524.48
2014-04-26 03:30:00	4524.3
2014-04-26 04:00:00	4498.54
2014-04-26 04:30:00	4513.98
2014-04-26 05:00:00	4538.86
2014-04-26 05:30:00	4630.66
2014-04-26 06:00:00	4673.77
2014-04-26 06:30:00	4752.52
2014-04-26 07:00:00	4847.94
2014-04-26 07:30:00	5033.78
2014-04-26 08:00:00	5138.53
2014-04-26 08:30:00	5202.2
2014-04-26 09:00:00	5277.62
2014-04-26 09:30:00	5341.98
2014-04-26 10:00:00	5292.35
2014-04-26 10:30:00	5277.75
2014-04-26 11:00:00	5292.87
2014-04-26 11:30:00	5235.51
2014-04-26 12:00:00	5279.41
2014-04-26 12:30:00	5316.31
2014-04-26 13:00:00	5251.28
2014-04-26 13:30:00	5303.51
2014-04-26 14:00:00	5324.02
2014-04-26 14:30:00	5414.81
2014-04-26 15:00:00	5472.52
2014-04-26 15:30:00	5546.61
2014-04-26 16:00:00	5631.45
2014-04-26 16:30:00	5729
2014-04-26 17:00:00	5900.42
2014-04-26 17:30:00	6016.1
2014-04-26 18:00:00	6255.73
2014-04-26 18:30:00	6250.9
2014-04-26 19:00:00	6094.45
2014-04-26 19:30:00	5922.64
2014-04-26 20:00:00	5770.52
2014-04-26 20:30:00	5685.07
2014-04-26 21:00:00	5686.29
2014-04-26 21:30:00	5710.79
2014-04-26 22:00:00	5589.75
2014-04-26 22:30:00	5439.93
2014-04-26 23:00:00	5343.72
2014-04-26 23:30:00	5293.97
2014-04-27	5172.4
2014-04-27 00:30:00	5021.98
2014-04-27 01:00:00	4885.04
2014-04-27 01:30:00	4701.63
2014-04-27 02:00:00	4585.85
2014-04-27 02:30:00	4502.54
2014-04-27 03:00:00	4487.52
2014-04-27 03:30:00	4500.19
2014-04-27 04:00:00	4470.26
2014-04-27 04:30:00	4508.96
2014-04-27 05:00:00	4534.51
2014-04-27 05:30:00	4589.56
2014-04-27 06:00:00	4594.13
2014-04-27 06:30:00	4621.74
2014-04-27 07:00:00	4686.88
2014-04-27 07:30:00	4840.95
2014-04-27 08:00:00	4922.86
2014-04-27 08:30:00	5085.39
2014-04-27 09:00:00	5179.79
2014-04-27 09:30:00	5197.81
2014-04-27 10:00:00	5143.46
2014-04-27 10:30:00	5140.31
2014-04-27 11:00:00	5136.82
2014-04-27 11:30:00	5146.43
2014-04-27 12:00:00	5162.02
2014-04-27 12:30:00	5169.65
2014-04-27 13:00:00	5228.66
2014-04-27 13:30:00	5213.82
2014-04-27 14:00:00	5294.38
2014-04-27 14:30:00	5371.72
2014-04-27 15:00:00	5469.91
2014-04-27 15:30:00	5546.12
2014-04-27 16:00:00	5667.73
2014-04-27 16:30:00	5771.38
2014-04-27 17:00:00	5922.45
2014-04-27 17:30:00	6139.26
2014-04-27 18:00:00	6337.21
2014-04-27 18:30:00	6367.53
2014-04-27 19:00:00	6217.76
2014-04-27 19:30:00	6007.89
2014-04-27 20:00:00	5850.78
2014-04-27 20:30:00	5774.56
2014-04-27 21:00:00	5752.28
2014-04-27 21:30:00	5729.66
2014-04-27 22:00:00	5564.33
2014-04-27 22:30:00	5362.11
2014-04-27 23:00:00	5278.11
2014-04-27 23:30:00	5221.04
2014-04-28	5117.92
2014-04-28 00:30:00	4939.84
2014-04-28 01:00:00	4796.46
2014-04-28 01:30:00	4640.38
2014-04-28 02:00:00	4532.5
2014-04-28 02:30:00	4435.46
2014-04-28 03:00:00	4473.32
2014-04-28 03:30:00	4470.33
2014-04-28 04:00:00	4473.99
2014-04-28 04:30:00	4539.56
2014-04-28 05:00:00	4632.03
2014-04-28 05:30:00	4834.78
2014-04-28 06:00:00	5037.39
2014-04-28 06:30:00	5446.57
2014-04-28 07:00:00	5781.26
2014-04-28 07:30:00	6122.91
2014-04-28 08:00:00	6272.52
2014-04-28 08:30:00	6288.49
2014-04-28 09:00:00	6249.64
2014-04-28 09:30:00	6227.87
2014-04-28 10:00:00	6185.45
2014-04-28 10:30:00	6188.8
2014-04-28 11:00:00	6150.54
2014-04-28 11:30:00	6088.65
2014-04-28 12:00:00	6114.52
2014-04-28 12:30:00	6080.06
2014-04-28 13:00:00	6124.05
2014-04-28 13:30:00	6106.88
2014-04-28 14:00:00	6149.59
2014-04-28 14:30:00	6198.84
2014-04-28 15:00:00	6225.04
2014-04-28 15:30:00	6251.73
2014-04-28 16:00:00	6313.21
2014-04-28 16:30:00	6369.82
2014-04-28 17:00:00	6491.51
2014-04-28 17:30:00	6639.05
2014-04-28 18:00:00	6802.08
2014-04-28 18:30:00	6691.74
2014-04-28 19:00:00	6511.56
2014-04-28 19:30:00	6374.95
2014-04-28 20:00:00	6248.35
2014-04-28 20:30:00	6123.96
2014-04-28 21:00:00	6016.09
2014-04-28 21:30:00	6027.25
2014-04-28 22:00:00	5870.66
2014-04-28 22:30:00	5630.92
2014-04-28 23:00:00	5453.2
2014-04-28 23:30:00	5372
2014-04-29	5229.99
2014-04-29 00:30:00	5073.86
2014-04-29 01:00:00	4907.9
2014-04-29 01:30:00	4718.77
2014-04-29 02:00:00	4662.35
2014-04-29 02:30:00	4568.36
2014-04-29 03:00:00	4550.77
2014-04-29 03:30:00	4544.95
2014-04-29 04:00:00	4548.85
2014-04-29 04:30:00	4603.3
2014-04-29 05:00:00	4683.94
2014-04-29 05:30:00	4825.98
2014-04-29 06:00:00	5017.1
2014-04-29 06:30:00	5405.22
2014-04-29 07:00:00	5730.36
2014-04-29 07:30:00	6032.67
2014-04-29 08:00:00	6075.36
2014-04-29 08:30:00	5995.1
2014-04-29 09:00:00	5925.49
2014-04-29 09:30:00	5951.16
2014-04-29 10:00:00	5854.94
2014-04-29 10:30:00	5836.16
2014-04-29 11:00:00	5847.63
2014-04-29 11:30:00	5829.78
2014-04-29 12:00:00	5896.96
2014-04-29 12:30:00	5921.49
2014-04-29 13:00:00	5946.85
2014-04-29 13:30:00	6006.32
2014-04-29 14:00:00	6001.8
2014-04-29 14:30:00	6054.96
2014-04-29 15:00:00	6116.52
2014-04-29 15:30:00	6160.63
2014-04-29 16:00:00	6199.54
2014-04-29 16:30:00	6294.9
2014-04-29 17:00:00	6389.59
2014-04-29 17:30:00	6513.47
2014-04-29 18:00:00	6723.13
2014-04-29 18:30:00	6668.09
2014-04-29 19:00:00	6533.35
2014-04-29 19:30:00	6330.97
2014-04-29 20:00:00	6165.78
2014-04-29 20:30:00	6079.22
2014-04-29 21:00:00	6018.5
2014-04-29 21:30:00	6030.8
2014-04-29 22:00:00	5832.91
2014-04-29 22:30:00	5606.26
2014-04-29 23:00:00	5493.09
2014-04-29 23:30:00	5395.44
2014-04-30	5245.63
2014-04-30 00:30:00	5051.62
2014-04-30 01:00:00	4899.84
2014-04-30 01:30:00	4751.31
2014-04-30 02:00:00	4618.63
2014-04-30 02:30:00	4533.96
2014-04-30 03:00:00	4537.01
2014-04-30 03:30:00	4534.44
2014-04-30 04:00:00	4514.18
2014-04-30 04:30:00	4556.96
2014-04-30 05:00:00	4638.05
2014-04-30 05:30:00	4808.13
2014-04-30 06:00:00	5027.69
2014-04-30 06:30:00	5352.69
2014-04-30 07:00:00	5642.37
2014-04-30 07:30:00	5970.66
2014-04-30 08:00:00	6026.32
2014-04-30 08:30:00	5932.84
2014-04-30 09:00:00	5887.71
2014-04-30 09:30:00	5870.36
2014-04-30 10:00:00	5824.53
2014-04-30 10:30:00	5872.55
2014-04-30 11:00:00	5909.09
2014-04-30 11:30:00	5912.02
2014-04-30 12:00:00	5973.56
2014-04-30 12:30:00	5944.35
2014-04-30 13:00:00	5990.22
2014-04-30 13:30:00	6023.83
2014-04-30 14:00:00	6013.82
2014-04-30 14:30:00	6195.3
2014-04-30 15:00:00	6287.08
2014-04-30 15:30:00	6268.03
2014-04-30 16:00:00	6296.73
2014-04-30 16:30:00	6396.31
2014-04-30 17:00:00	6477.66
2014-04-30 17:30:00	6655.48
2014-04-30 18:00:00	6875.11
2014-04-30 18:30:00	6745.85
2014-04-30 19:00:00	6597.6
2014-04-30 19:30:00	6417.25
2014-04-30 20:00:00	6271.56
2014-04-30 20:30:00	6200.76
2014-04-30 21:00:00	6104.34
2014-04-30 21:30:00	6064.48
2014-04-30 22:00:00	5886.28
2014-04-30 22:30:00	5685.2
2014-04-30 23:00:00	5558.62
2014-04-30 23:30:00	5455.94
2014-05-01	5341.23

## Sheet: QLD-Jul
SETTLEMENTDATE	TOTALDEMAND
2014-07-01 00:30:00	5336.19
2014-07-01 01:00:00	5182.52
2014-07-01 01:30:00	5054.99
2014-07-01 02:00:00	4912.67
2014-07-01 02:30:00	4811.88
2014-07-01 03:00:00	4776.95
2014-07-01 03:30:00	4729.34
2014-07-01 04:00:00	4712.72
2014-07-01 04:30:00	4776.02
2014-07-01 05:00:00	4885.36
2014-07-01 05:30:00	5152.14
2014-07-01 06:00:00	5464.52
2014-07-01 06:30:00	5974.09
2014-07-01 07:00:00	6394.52
2014-07-01 07:30:00	6730.3
2014-07-01 08:00:00	6736.92
2014-07-01 08:30:00	6725.66
2014-07-01 09:00:00	6520.33
2014-07-01 09:30:00	6294.98
2014-07-01 10:00:00	6068.59
2014-07-01 10:30:00	5916.26
2014-07-01 11:00:00	5778.57
2014-07-01 11:30:00	5636.67
2014-07-01 12:00:00	5536.69
2014-07-01 12:30:00	5466.9
2014-07-01 13:00:00	5451.93
2014-07-01 13:30:00	5446.91
2014-07-01 14:00:00	5471.49
2014-07-01 14:30:00	5542.26
2014-07-01 15:00:00	5593.35
2014-07-01 15:30:00	5673.37
2014-07-01 16:00:00	5809.62
2014-07-01 16:30:00	6041.2
2014-07-01 17:00:00	6431.17
2014-07-01 17:30:00	6885.77
2014-07-01 18:00:00	7246.81
2014-07-01 18:30:00	7268.81
2014-07-01 19:00:00	7288.08
2014-07-01 19:30:00	7166.32
2014-07-01 20:00:00	7123.44
2014-07-01 20:30:00	7102.33
2014-07-01 21:00:00	6936.47
2014-07-01 21:30:00	6735.29
2014-07-01 22:00:00	6465.33
2014-07-01 22:30:00	6174.31
2014-07-01 23:00:00	5985.28
2014-07-01 23:30:00	5731.21
2014-07-02	5544.53
2014-07-02 00:30:00	5393.83
2014-07-02 01:00:00	5221.8
2014-07-02 01:30:00	5034.39
2014-07-02 02:00:00	4876.5
2014-07-02 02:30:00	4755.9
2014-07-02 03:00:00	4666.87
2014-07-02 03:30:00	4626
2014-07-02 04:00:00	4622.13
2014-07-02 04:30:00	4690.69
2014-07-02 05:00:00	4844.67
2014-07-02 05:30:00	5079.51
2014-07-02 06:00:00	5408.17
2014-07-02 06:30:00	5890.72
2014-07-02 07:00:00	6245.28
2014-07-02 07:30:00	6629.29
2014-07-02 08:00:00	6698.51
2014-07-02 08:30:00	6625.54
2014-07-02 09:00:00	6452.3
2014-07-02 09:30:00	6219.62
2014-07-02 10:00:00	5953.03
2014-07-02 10:30:00	5748.61
2014-07-02 11:00:00	5568.59
2014-07-02 11:30:00	5465.9
2014-07-02 12:00:00	5341.17
2014-07-02 12:30:00	5282.59
2014-07-02 13:00:00	5231.42
2014-07-02 13:30:00	5221.87
2014-07-02 14:00:00	5246.55
2014-07-02 14:30:00	5275.09
2014-07-02 15:00:00	5318.53
2014-07-02 15:30:00	5502.18
2014-07-02 16:00:00	5639.79
2014-07-02 16:30:00	5825.4
2014-07-02 17:00:00	6167.43
2014-07-02 17:30:00	6526.31
2014-07-02 18:00:00	6874.84
2014-07-02 18:30:00	6904.02
2014-07-02 19:00:00	6981.28
2014-07-02 19:30:00	6896.12
2014-07-02 20:00:00	6885.94
2014-07-02 20:30:00	6885.64
2014-07-02 21:00:00	6690.95
2014-07-02 21:30:00	6519.68
2014-07-02 22:00:00	6276.28
2014-07-02 22:30:00	6006.75
2014-07-02 23:00:00	5797.71
2014-07-02 23:30:00	5618.28
2014-07-03	5360.07
2014-07-03 00:30:00	5227.54
2014-07-03 01:00:00	5096.38
2014-07-03 01:30:00	4906.45
2014-07-03 02:00:00	4783.33
2014-07-03 02:30:00	4688.06
2014-07-03 03:00:00	4617.6
2014-07-03 03:30:00	4551.23
2014-07-03 04:00:00	4546.01
2014-07-03 04:30:00	4630.12
2014-07-03 05:00:00	4748.08
2014-07-03 05:30:00	5032.29
2014-07-03 06:00:00	5323.6
2014-07-03 06:30:00	5789.12
2014-07-03 07:00:00	6178.8
2014-07-03 07:30:00	6544.54
2014-07-03 08:00:00	6614.06
2014-07-03 08:30:00	6511.01
2014-07-03 09:00:00	6360.61
2014-07-03 09:30:00	6196.99
2014-07-03 10:00:00	5951.33
2014-07-03 10:30:00	5764.04
2014-07-03 11:00:00	5641.86
2014-07-03 11:30:00	5531.57
2014-07-03 12:00:00	5493.7
2014-07-03 12:30:00	5482.41
2014-07-03 13:00:00	5395.06
2014-07-03 13:30:00	5398.17
2014-07-03 14:00:00	5435.93
2014-07-03 14:30:00	5519.33
2014-07-03 15:00:00	5573.93
2014-07-03 15:30:00	5737.62
2014-07-03 16:00:00	5805.11
2014-07-03 16:30:00	5958.95
2014-07-03 17:00:00	6235.73
2014-07-03 17:30:00	6507.13
2014-07-03 18:00:00	6737.39
2014-07-03 18:30:00	6811.26
2014-07-03 19:00:00	6838.57
2014-07-03 19:30:00	6699.51
2014-07-03 20:00:00	6656.82
2014-07-03 20:30:00	6689.32
2014-07-03 21:00:00	6493.08
2014-07-03 21:30:00	6282
2014-07-03 22:00:00	6064.91
2014-07-03 22:30:00	5889.78
2014-07-03 23:00:00	5685.23
2014-07-03 23:30:00	5549.92
2014-07-04	5308.49
2014-07-04 00:30:00	5183.54
2014-07-04 01:00:00	5015.21
2014-07-04 01:30:00	4882.69
2014-07-04 02:00:00	4726.62
2014-07-04 02:30:00	4646.61
2014-07-04 03:00:00	4576.35
2014-07-04 03:30:00	4577.11
2014-07-04 04:00:00	4589.88
2014-07-04 04:30:00	4633.34
2014-07-04 05:00:00	4743.47
2014-07-04 05:30:00	4980.76
2014-07-04 06:00:00	5229.1
2014-07-04 06:30:00	5631.29
2014-07-04 07:00:00	5970.12
2014-07-04 07:30:00	6269.27
2014-07-04 08:00:00	6373.34
2014-07-04 08:30:00	6342.02
2014-07-04 09:00:00	6234.55
2014-07-04 09:30:00	6145.27
2014-07-04 10:00:00	5922.78
2014-07-04 10:30:00	5805.29
2014-07-04 11:00:00	5684.49
2014-07-04 11:30:00	5576.23
2014-07-04 12:00:00	5550.56
2014-07-04 12:30:00	5507.25
2014-07-04 13:00:00	5528.89
2014-07-04 13:30:00	5578.12
2014-07-04 14:00:00	5587.12
2014-07-04 14:30:00	5616.12
2014-07-04 15:00:00	5682.53
2014-07-04 15:30:00	5748.45
2014-07-04 16:00:00	5842.69
2014-07-04 16:30:00	5957.06
2014-07-04 17:00:00	6170.98
2014-07-04 17:30:00	6397.83
2014-07-04 18:00:00	6530.5
2014-07-04 18:30:00	6537.83
2014-07-04 19:00:00	6541.34
2014-07-04 19:30:00	6380.65
2014-07-04 20:00:00	6385.94
2014-07-04 20:30:00	6414.47
2014-07-04 21:00:00	6272.49
2014-07-04 21:30:00	6143.85
2014-07-04 22:00:00	5965.07
2014-07-04 22:30:00	5538.8
2014-07-04 23:00:00	5544.74
2014-07-04 23:30:00	5579.09
2014-07-05	5347.67
2014-07-05 00:30:00	5206.87
2014-07-05 01:00:00	5021.44
2014-07-05 01:30:00	4835.95
2014-07-05 02:00:00	4678.25
2014-07-05 02:30:00	4576.03
2014-07-05 03:00:00	4565.94
2014-07-05 03:30:00	4523.53
2014-07-05 04:00:00	4494.17
2014-07-05 04:30:00	4520.84
2014-07-05 05:00:00	4564.91
2014-07-05 05:30:00	4643.12
2014-07-05 06:00:00	4755.07
2014-07-05 06:30:00	4856.08
2014-07-05 07:00:00	5013.96
2014-07-05 07:30:00	5226.59
2014-07-05 08:00:00	5326.44
2014-07-05 08:30:00	5454.74
2014-07-05 09:00:00	5458.29
2014-07-05 09:30:00	5396.61
2014-07-05 10:00:00	5269.64
2014-07-05 10:30:00	5185.77
2014-07-05 11:00:00	5066.73
2014-07-05 11:30:00	4989.62
2014-07-05 12:00:00	4938.97
2014-07-05 12:30:00	4866.47
2014-07-05 13:00:00	4869.64
2014-07-05 13:30:00	4899.33
2014-07-05 14:00:00	4912.34
2014-07-05 14:30:00	4958.48
2014-07-05 15:00:00	5016.33
2014-07-05 15:30:00	5071.47
2014-07-05 16:00:00	5242.57
2014-07-05 16:30:00	5356.18
2014-07-05 17:00:00	5640.74
2014-07-05 17:30:00	5889.03
2014-07-05 18:00:00	6065.67
2014-07-05 18:30:00	6125.31
2014-07-05 19:00:00	6112.54
2014-07-05 19:30:00	6002.02
2014-07-05 20:00:00	5944.19
2014-07-05 20:30:00	5994.18
2014-07-05 21:00:00	5865.24
2014-07-05 21:30:00	5788.09
2014-07-05 22:00:00	5710.57
2014-07-05 22:30:00	5541.56
2014-07-05 23:00:00	5456.62
2014-07-05 23:30:00	5376.65
2014-07-06	5216.51
2014-07-06 00:30:00	5094.33
2014-07-06 01:00:00	4930.93
2014-07-06 01:30:00	4816.52
2014-07-06 02:00:00	4625.22
2014-07-06 02:30:00	4542.56
2014-07-06 03:00:00	4519.91
2014-07-06 03:30:00	4511.33
2014-07-06 04:00:00	4488.24
2014-07-06 04:30:00	4480.66
2014-07-06 05:00:00	4565.81
2014-07-06 05:30:00	4595.05
2014-07-06 06:00:00	4648.34
2014-07-06 06:30:00	4749.33
2014-07-06 07:00:00	4890.88
2014-07-06 07:30:00	5089.04
2014-07-06 08:00:00	5200.54
2014-07-06 08:30:00	5234.48
2014-07-06 09:00:00	5268.78
2014-07-06 09:30:00	5259.79
2014-07-06 10:00:00	5128.5
2014-07-06 10:30:00	4980.28
2014-07-06 11:00:00	4925.77
2014-07-06 11:30:00	4804.03
2014-07-06 12:00:00	4732.11
2014-07-06 12:30:00	4691.63
2014-07-06 13:00:00	4682.92
2014-07-06 13:30:00	4714.89
2014-07-06 14:00:00	4721.51
2014-07-06 14:30:00	4765.43
2014-07-06 15:00:00	4827.25
2014-07-06 15:30:00	4958.98
2014-07-06 16:00:00	5127.25
2014-07-06 16:30:00	5400.2
2014-07-06 17:00:00	5768.09
2014-07-06 17:30:00	6149.93
2014-07-06 18:00:00	6459.53
2014-07-06 18:30:00	6567.11
2014-07-06 19:00:00	6539.3
2014-07-06 19:30:00	6436.73
2014-07-06 20:00:00	6406.36
2014-07-06 20:30:00	6384.09
2014-07-06 21:00:00	6277.41
2014-07-06 21:30:00	6155.87
2014-07-06 22:00:00	5952.63
2014-07-06 22:30:00	5761.1
2014-07-06 23:00:00	5654.55
2014-07-06 23:30:00	5538.65
2014-07-07	5311.5
2014-07-07 00:30:00	5163.87
2014-07-07 01:00:00	5062.53
2014-07-07 01:30:00	4876.9
2014-07-07 02:00:00	4709.44
2014-07-07 02:30:00	4613.69
2014-07-07 03:00:00	4600.08
2014-07-07 03:30:00	4554.35
2014-07-07 04:00:00	4556.79
2014-07-07 04:30:00	4681.03
2014-07-07 05:00:00	4793.52
2014-07-07 05:30:00	5044.46
2014-07-07 06:00:00	5321.19
2014-07-07 06:30:00	5773.74
2014-07-07 07:00:00	6183.71
2014-07-07 07:30:00	6521.83
2014-07-07 08:00:00	6572.55
2014-07-07 08:30:00	6557.28
2014-07-07 09:00:00	6374.28
2014-07-07 09:30:00	6237.84
2014-07-07 10:00:00	6026.56
2014-07-07 10:30:00	5861.98
2014-07-07 11:00:00	5711.47
2014-07-07 11:30:00	5605.66
2014-07-07 12:00:00	5569.85
2014-07-07 12:30:00	5496.45
2014-07-07 13:00:00	5479.33
2014-07-07 13:30:00	5450.01
2014-07-07 14:00:00	5483.49
2014-07-07 14:30:00	5536.99
2014-07-07 15:00:00	5556.72
2014-07-07 15:30:00	5703.36
2014-07-07 16:00:00	5817.34
2014-07-07 16:30:00	5998.55
2014-07-07 17:00:00	6314.64
2014-07-07 17:30:00	6760.03
2014-07-07 18:00:00	7103.94
2014-07-07 18:30:00	7177.27
2014-07-07 19:00:00	7183.17
2014-07-07 19:30:00	7049.68
2014-07-07 20:00:00	7003.93
2014-07-07 20:30:00	6992.44
2014-07-07 21:00:00	6832.74
2014-07-07 21:30:00	6691.3
2014-07-07 22:00:00	6458.5
2014-07-07 22:30:00	6148.69
2014-07-07 23:00:00	5973.65
2014-07-07 23:30:00	5825.48
2014-07-08	5607.16
2014-07-08 00:30:00	5405.06
2014-07-08 01:00:00	5274.37
2014-07-08 01:30:00	5084.35
2014-07-08 02:00:00	4933.64
2014-07-08 02:30:00	4842.24
2014-07-08 03:00:00	4793.48
2014-07-08 03:30:00	4760.26
2014-07-08 04:00:00	4740.95
2014-07-08 04:30:00	4783.15
2014-07-08 05:00:00	4948.29
2014-07-08 05:30:00	5212.92
2014-07-08 06:00:00	5482.9
2014-07-08 06:30:00	5974.9
2014-07-08 07:00:00	6350.98
2014-07-08 07:30:00	6757.98
2014-07-08 08:00:00	6801.94
2014-07-08 08:30:00	6682.96
2014-07-08 09:00:00	6494.12
2014-07-08 09:30:00	6269.38
2014-07-08 10:00:00	6011.32
2014-07-08 10:30:00	5812.66
2014-07-08 11:00:00	5709.63
2014-07-08 11:30:00	5524.07
2014-07-08 12:00:00	5431.87
2014-07-08 12:30:00	5395.52
2014-07-08 13:00:00	5359.17
2014-07-08 13:30:00	5374.68
2014-07-08 14:00:00	5351.81
2014-07-08 14:30:00	5403.57
2014-07-08 15:00:00	5476.74
2014-07-08 15:30:00	5589.39
2014-07-08 16:00:00	5693.92
2014-07-08 16:30:00	5896.37
2014-07-08 17:00:00	6256.19
2014-07-08 17:30:00	6655.82
2014-07-08 18:00:00	7004.51
2014-07-08 18:30:00	7058.03
2014-07-08 19:00:00	7104.02
2014-07-08 19:30:00	7040.45
2014-07-08 20:00:00	7002.35
2014-07-08 20:30:00	6997.76
2014-07-08 21:00:00	6845.63
2014-07-08 21:30:00	6668.28
2014-07-08 22:00:00	6400.56
2014-07-08 22:30:00	6113.65
2014-07-08 23:00:00	5910.45
2014-07-08 23:30:00	5760.44
2014-07-09	5532.8
2014-07-09 00:30:00	5355.59
2014-07-09 01:00:00	5175.34
2014-07-09 01:30:00	5020.01
2014-07-09 02:00:00	4885.02
2014-07-09 02:30:00	4777.95
2014-07-09 03:00:00	4715.57
2014-07-09 03:30:00	4687.46
2014-07-09 04:00:00	4734.91
2014-07-09 04:30:00	4821.69
2014-07-09 05:00:00	4924.12
2014-07-09 05:30:00	5212.74
2014-07-09 06:00:00	5562.16
2014-07-09 06:30:00	6042.26
2014-07-09 07:00:00	6416.23
2014-07-09 07:30:00	6783.1
2014-07-09 08:00:00	6885.85
2014-07-09 08:30:00	6810.55
2014-07-09 09:00:00	6591.85
2014-07-09 09:30:00	6370.21
2014-07-09 10:00:00	6122.34
2014-07-09 10:30:00	5868.03
2014-07-09 11:00:00	5676.95
2014-07-09 11:30:00	5503.34
2014-07-09 12:00:00	5481.91
2014-07-09 12:30:00	5455.87
2014-07-09 13:00:00	5372.18
2014-07-09 13:30:00	5334.08
2014-07-09 14:00:00	5411.94
2014-07-09 14:30:00	5452.57
2014-07-09 15:00:00	5505.41
2014-07-09 15:30:00	5682.88
2014-07-09 16:00:00	5778.68
2014-07-09 16:30:00	5982.48
2014-07-09 17:00:00	6270.18
2014-07-09 17:30:00	6569.2
2014-07-09 18:00:00	6892.85
2014-07-09 18:30:00	6908.95
2014-07-09 19:00:00	6938.84
2014-07-09 19:30:00	6821.28
2014-07-09 20:00:00	6763.39
2014-07-09 20:30:00	6768.48
2014-07-09 21:00:00	6584.61
2014-07-09 21:30:00	6457
2014-07-09 22:00:00	6289.62
2014-07-09 22:30:00	6060.26
2014-07-09 23:00:00	5904.6
2014-07-09 23:30:00	5753.18
2014-07-10	5486.68
2014-07-10 00:30:00	5289.95
2014-07-10 01:00:00	5151.99
2014-07-10 01:30:00	4954.58
2014-07-10 02:00:00	4835.47
2014-07-10 02:30:00	4677.93
2014-07-10 03:00:00	4653.44
2014-07-10 03:30:00	4661.05
2014-07-10 04:00:00	4609.7
2014-07-10 04:30:00	4693.89
2014-07-10 05:00:00	4804.42
2014-07-10 05:30:00	5071.26
2014-07-10 06:00:00	5355.31
2014-07-10 06:30:00	5768.15
2014-07-10 07:00:00	6074.01
2014-07-10 07:30:00	6449.2
2014-07-10 08:00:00	6468.31
2014-07-10 08:30:00	6319.26
2014-07-10 09:00:00	6205.67
2014-07-10 09:30:00	6045.76
2014-07-10 10:00:00	5825.96
2014-07-10 10:30:00	5713.63
2014-07-10 11:00:00	5606.18
2014-07-10 11:30:00	5525.44
2014-07-10 12:00:00	5529.97
2014-07-10 12:30:00	5420.75
2014-07-10 13:00:00	5404.46
2014-07-10 13:30:00	5464.44
2014-07-10 14:00:00	5496.17
2014-07-10 14:30:00	5527.49
2014-07-10 15:00:00	5616.95
2014-07-10 15:30:00	5747.89
2014-07-10 16:00:00	5844.09
2014-07-10 16:30:00	6039.04
2014-07-10 17:00:00	6381.63
2014-07-10 17:30:00	6710.84
2014-07-10 18:00:00	7061.04
2014-07-10 18:30:00	7148.09
2014-07-10 19:00:00	7251.53
2014-07-10 19:30:00	7150.89
2014-07-10 20:00:00	7095.09
2014-07-10 20:30:00	7068.53
2014-07-10 21:00:00	6861.1
2014-07-10 21:30:00	6672.59
2014-07-10 22:00:00	6415.57
2014-07-10 22:30:00	6174.29
2014-07-10 23:00:00	6008.62
2014-07-10 23:30:00	5804.37
2014-07-11	5573.36
2014-07-11 00:30:00	5427.6
2014-07-11 01:00:00	5262.39
2014-07-11 01:30:00	5105.04
2014-07-11 02:00:00	4912.55
2014-07-11 02:30:00	4837.83
2014-07-11 03:00:00	4797.6
2014-07-11 03:30:00	4751.98
2014-07-11 04:00:00	4769.17
2014-07-11 04:30:00	4837.53
2014-07-11 05:00:00	4921.53
2014-07-11 05:30:00	5201.37
2014-07-11 06:00:00	5534.58
2014-07-11 06:30:00	5962.06
2014-07-11 07:00:00	6302.98
2014-07-11 07:30:00	6660.88
2014-07-11 08:00:00	6732.77
2014-07-11 08:30:00	6627.56
2014-07-11 09:00:00	6518.04
2014-07-11 09:30:00	6240.49
2014-07-11 10:00:00	6013.46
2014-07-11 10:30:00	5797.04
2014-07-11 11:00:00	5632.57
2014-07-11 11:30:00	5514.3
2014-07-11 12:00:00	5441.26
2014-07-11 12:30:00	5335.34
2014-07-11 13:00:00	5343.57
2014-07-11 13:30:00	5338.14
2014-07-11 14:00:00	5345.97
2014-07-11 14:30:00	5369.48
2014-07-11 15:00:00	5447.28
2014-07-11 15:30:00	5553.68
2014-07-11 16:00:00	5678.73
2014-07-11 16:30:00	5858.61
2014-07-11 17:00:00	6174.6
2014-07-11 17:30:00	6531.27
2014-07-11 18:00:00	6792.28
2014-07-11 18:30:00	6832.63
2014-07-11 19:00:00	6858.74
2014-07-11 19:30:00	6811.92
2014-07-11 20:00:00	6848.33
2014-07-11 20:30:00	6809.58
2014-07-11 21:00:00	6708.38
2014-07-11 21:30:00	6590.15
2014-07-11 22:00:00	6392.21
2014-07-11 22:30:00	6150.3
2014-07-11 23:00:00	5995.97
2014-07-11 23:30:00	5833.19
2014-07-12	5613.89
2014-07-12 00:30:00	5476.81
2014-07-12 01:00:00	5326.76
2014-07-12 01:30:00	5139.49
2014-07-12 02:00:00	4988.99
2014-07-12 02:30:00	4879.9
2014-07-12 03:00:00	4788.42
2014-07-12 03:30:00	4733.48
2014-07-12 04:00:00	4760.98
2014-07-12 04:30:00	4761.39
2014-07-12 05:00:00	4830.9
2014-07-12 05:30:00	4984.18
2014-07-12 06:00:00	5141.82
2014-07-12 06:30:00	5331.76
2014-07-12 07:00:00	5558.31
2014-07-12 07:30:00	5833.2
2014-07-12 08:00:00	5936.7
2014-07-12 08:30:00	6006.57
2014-07-12 09:00:00	5933.19
2014-07-12 09:30:00	5797.14
2014-07-12 10:00:00	5644.58
2014-07-12 10:30:00	5494.06
2014-07-12 11:00:00	5255.09
2014-07-12 11:30:00	5065.65
2014-07-12 12:00:00	4952.67
2014-07-12 12:30:00	4866.95
2014-07-12 13:00:00	4870.19
2014-07-12 13:30:00	4804.72
2014-07-12 14:00:00	4845.42
2014-07-12 14:30:00	4894.15
2014-07-12 15:00:00	4943.82
2014-07-12 15:30:00	5033.32
2014-07-12 16:00:00	5192.39
2014-07-12 16:30:00	5418.6
2014-07-12 17:00:00	5792.55
2014-07-12 17:30:00	6147.39
2014-07-12 18:00:00	6404.19
2014-07-12 18:30:00	6490.93
2014-07-12 19:00:00	6494.29
2014-07-12 19:30:00	6431.53
2014-07-12 20:00:00	6504.14
2014-07-12 20:30:00	6479.14
2014-07-12 21:00:00	6346.08
2014-07-12 21:30:00	6220.7
2014-07-12 22:00:00	6082.19
2014-07-12 22:30:00	5868.64
2014-07-12 23:00:00	5748.55
2014-07-12 23:30:00	5687.51
2014-07-13	5475.75
2014-07-13 00:30:00	5327.67
2014-07-13 01:00:00	5192.43
2014-07-13 01:30:00	5002.1
2014-07-13 02:00:00	4824.23
2014-07-13 02:30:00	4729.03
2014-07-13 03:00:00	4677.96
2014-07-13 03:30:00	4636.85
2014-07-13 04:00:00	4667.08
2014-07-13 04:30:00	4650.97
2014-07-13 05:00:00	4679.9
2014-07-13 05:30:00	4774.81
2014-07-13 06:00:00	4863.07
2014-07-13 06:30:00	5033.42
2014-07-13 07:00:00	5212.47
2014-07-13 07:30:00	5420.27
2014-07-13 08:00:00	5534.09
2014-07-13 08:30:00	5578.51
2014-07-13 09:00:00	5567.14
2014-07-13 09:30:00	5537.31
2014-07-13 10:00:00	5368.15
2014-07-13 10:30:00	5224.37
2014-07-13 11:00:00	5044.05
2014-07-13 11:30:00	4903
2014-07-13 12:00:00	4847.04
2014-07-13 12:30:00	4807.07
2014-07-13 13:00:00	4742.99
2014-07-13 13:30:00	4738.59
2014-07-13 14:00:00	4777.23
2014-07-13 14:30:00	4845.92
2014-07-13 15:00:00	4901.4
2014-07-13 15:30:00	5010.88
2014-07-13 16:00:00	5228.97
2014-07-13 16:30:00	5541.67
2014-07-13 17:00:00	5906.03
2014-07-13 17:30:00	6337.62
2014-07-13 18:00:00	6654.57
2014-07-13 18:30:00	6756.5
2014-07-13 19:00:00	6792.64
2014-07-13 19:30:00	6663.49
2014-07-13 20:00:00	6631.98
2014-07-13 20:30:00	6658.52
2014-07-13 21:00:00	6560.92
2014-07-13 21:30:00	6373.48
2014-07-13 22:00:00	6158.18
2014-07-13 22:30:00	5915.73
2014-07-13 23:00:00	5747.71
2014-07-13 23:30:00	5568.85
2014-07-14	5366.24
2014-07-14 00:30:00	5210.02
2014-07-14 01:00:00	5128.98
2014-07-14 01:30:00	4902.24
2014-07-14 02:00:00	4791.28
2014-07-14 02:30:00	4708.12
2014-07-14 03:00:00	4669.86
2014-07-14 03:30:00	4645.14
2014-07-14 04:00:00	4616.1
2014-07-14 04:30:00	4660.47
2014-07-14 05:00:00	4758.42
2014-07-14 05:30:00	5062.59
2014-07-14 06:00:00	5381.31
2014-07-14 06:30:00	5886.9
2014-07-14 07:00:00	6308.87
2014-07-14 07:30:00	6740.1
2014-07-14 08:00:00	6789.62
2014-07-14 08:30:00	6607.43
2014-07-14 09:00:00	6353.1
2014-07-14 09:30:00	6139.32
2014-07-14 10:00:00	6013.85
2014-07-14 10:30:00	5824.97
2014-07-14 11:00:00	5658.37
2014-07-14 11:30:00	5606.75
2014-07-14 12:00:00	5560.35
2014-07-14 12:30:00	5594.07
2014-07-14 13:00:00	5557.8
2014-07-14 13:30:00	5617.3
2014-07-14 14:00:00	5672.04
2014-07-14 14:30:00	5722.23
2014-07-14 15:00:00	5773.69
2014-07-14 15:30:00	5729.64
2014-07-14 16:00:00	5883.39
2014-07-14 16:30:00	6109.98
2014-07-14 17:00:00	6415.45
2014-07-14 17:30:00	6792.3
2014-07-14 18:00:00	7070.16
2014-07-14 18:30:00	7051.01
2014-07-14 19:00:00	7044.33
2014-07-14 19:30:00	6859.06
2014-07-14 20:00:00	6819.37
2014-07-14 20:30:00	6781
2014-07-14 21:00:00	6614.61
2014-07-14 21:30:00	6424.8
2014-07-14 22:00:00	6174.59
2014-07-14 22:30:00	5921.58
2014-07-14 23:00:00	5718.63
2014-07-14 23:30:00	5564.93
2014-07-15	5330.51
2014-07-15 00:30:00	5178.32
2014-07-15 01:00:00	5055.44
2014-07-15 01:30:00	4839.7
2014-07-15 02:00:00	4724.1
2014-07-15 02:30:00	4602.25
2014-07-15 03:00:00	4272.54
2014-07-15 03:30:00	4096.93
2014-07-15 04:00:00	4073
2014-07-15 04:30:00	4180.33
2014-07-15 05:00:00	4549.97
2014-07-15 05:30:00	4920.4
2014-07-15 06:00:00	5218.44
2014-07-15 06:30:00	5648.52
2014-07-15 07:00:00	6071.14
2014-07-15 07:30:00	6493.07
2014-07-15 08:00:00	6627.3
2014-07-15 08:30:00	6554.38
2014-07-15 09:00:00	6397.94
2014-07-15 09:30:00	6316.82
2014-07-15 10:00:00	6236.58
2014-07-15 10:30:00	6093.95
2014-07-15 11:00:00	5896.81
2014-07-15 11:30:00	5750.23
2014-07-15 12:00:00	5661.7
2014-07-15 12:30:00	5667.35
2014-07-15 13:00:00	5672.51
2014-07-15 13:30:00	5690.57
2014-07-15 14:00:00	5766.21
2014-07-15 14:30:00	5798
2014-07-15 15:00:00	5826.16
2014-07-15 15:30:00	5881.8
2014-07-15 16:00:00	5974.87
2014-07-15 16:30:00	6116.6
2014-07-15 17:00:00	6435.6
2014-07-15 17:30:00	6728.7
2014-07-15 18:00:00	6930.24
2014-07-15 18:30:00	6916.83
2014-07-15 19:00:00	6898.39
2014-07-15 19:30:00	6786.17
2014-07-15 20:00:00	6531.75
2014-07-15 20:30:00	6525.25
2014-07-15 21:00:00	6543.6
2014-07-15 21:30:00	6354.5
2014-07-15 22:00:00	6172.55
2014-07-15 22:30:00	5920.27
2014-07-15 23:00:00	5748.97
2014-07-15 23:30:00	5597.39
2014-07-16	5337.11
2014-07-16 00:30:00	5197.46
2014-07-16 01:00:00	5087.16
2014-07-16 01:30:00	4927.55
2014-07-16 02:00:00	4758.16
2014-07-16 02:30:00	4660.32
2014-07-16 03:00:00	4604.81
2014-07-16 03:30:00	4548.1
2014-07-16 04:00:00	4531.95
2014-07-16 04:30:00	4613.77
2014-07-16 05:00:00	4781.06
2014-07-16 05:30:00	5013.77
2014-07-16 06:00:00	5266.41
2014-07-16 06:30:00	5722.37
2014-07-16 07:00:00	6091.73
2014-07-16 07:30:00	6498.8
2014-07-16 08:00:00	6647.24
2014-07-16 08:30:00	6600.2
2014-07-16 09:00:00	6455.66
2014-07-16 09:30:00	6205.31
2014-07-16 10:00:00	5936.35
2014-07-16 10:30:00	5763.86
2014-07-16 11:00:00	5747.03
2014-07-16 11:30:00	5708.47
2014-07-16 12:00:00	5606.1
2014-07-16 12:30:00	5578.91
2014-07-16 13:00:00	5618.43
2014-07-16 13:30:00	5735.1
2014-07-16 14:00:00	5827.72
2014-07-16 14:30:00	5845.04
2014-07-16 15:00:00	5876.63
2014-07-16 15:30:00	5925.48
2014-07-16 16:00:00	6038.1
2014-07-16 16:30:00	6111.7
2014-07-16 17:00:00	6289.36
2014-07-16 17:30:00	6580.18
2014-07-16 18:00:00	6845.34
2014-07-16 18:30:00	6936.39
2014-07-16 19:00:00	6929.94
2014-07-16 19:30:00	6841.35
2014-07-16 20:00:00	6777.4
2014-07-16 20:30:00	6758.26
2014-07-16 21:00:00	6588.67
2014-07-16 21:30:00	6384.92
2014-07-16 22:00:00	6169.86
2014-07-16 22:30:00	5903.44
2014-07-16 23:00:00	5760.35
2014-07-16 23:30:00	5579.53
2014-07-17	5337.18
2014-07-17 00:30:00	5170.27
2014-07-17 01:00:00	5095.29
2014-07-17 01:30:00	4938.32
2014-07-17 02:00:00	4801.28
2014-07-17 02:30:00	4700.31
2014-07-17 03:00:00	4652.98
2014-07-17 03:30:00	4651.15
2014-07-17 04:00:00	4620.38
2014-07-17 04:30:00	4690.81
2014-07-17 05:00:00	4820.62
2014-07-17 05:30:00	5062.47
2014-07-17 06:00:00	5402.91
2014-07-17 06:30:00	5848.1
2014-07-17 07:00:00	6240.52
2014-07-17 07:30:00	6723.98
2014-07-17 08:00:00	6677.57
2014-07-17 08:30:00	6483.69
2014-07-17 09:00:00	6202.06
2014-07-17 09:30:00	5960.49
2014-07-17 10:00:00	5756.22
2014-07-17 10:30:00	5604.18
2014-07-17 11:00:00	5485.03
2014-07-17 11:30:00	5439.18
2014-07-17 12:00:00	5392.22
2014-07-17 12:30:00	5380.75
2014-07-17 13:00:00	5385.97
2014-07-17 13:30:00	5405.1
2014-07-17 14:00:00	5476.24
2014-07-17 14:30:00	5536.5
2014-07-17 15:00:00	5552.33
2014-07-17 15:30:00	5623.11
2014-07-17 16:00:00	5805.65
2014-07-17 16:30:00	5983.37
2014-07-17 17:00:00	6237.48
2014-07-17 17:30:00	6457.07
2014-07-17 18:00:00	6837.43
2014-07-17 18:30:00	6920.28
2014-07-17 19:00:00	6936.37
2014-07-17 19:30:00	6889.12
2014-07-17 20:00:00	6851.02
2014-07-17 20:30:00	6859.9
2014-07-17 21:00:00	6713.08
2014-07-17 21:30:00	6493.47
2014-07-17 22:00:00	6250.63
2014-07-17 22:30:00	6063.08
2014-07-17 23:00:00	5864.62
2014-07-17 23:30:00	5731.37
2014-07-18	5460.87
2014-07-18 00:30:00	5331.6
2014-07-18 01:00:00	5178.16
2014-07-18 01:30:00	4965.02
2014-07-18 02:00:00	4860.69
2014-07-18 02:30:00	4760.52
2014-07-18 03:00:00	4728.28
2014-07-18 03:30:00	4638.36
2014-07-18 04:00:00	4672.34
2014-07-18 04:30:00	4744.65
2014-07-18 05:00:00	4862.03
2014-07-18 05:30:00	5160.54
2014-07-18 06:00:00	5432.8
2014-07-18 06:30:00	5899.94
2014-07-18 07:00:00	6300
2014-07-18 07:30:00	6686.63
2014-07-18 08:00:00	6682.88
2014-07-18 08:30:00	6497.68
2014-07-18 09:00:00	6259.38
2014-07-18 09:30:00	6065.99
2014-07-18 10:00:00	5898.23
2014-07-18 10:30:00	5774.15
2014-07-18 11:00:00	5681.88
2014-07-18 11:30:00	5626.11
2014-07-18 12:00:00	5574.88
2014-07-18 12:30:00	5475.59
2014-07-18 13:00:00	5407.81
2014-07-18 13:30:00	5349.5
2014-07-18 14:00:00	5361.39
2014-07-18 14:30:00	5410.35
2014-07-18 15:00:00	5476.75
2014-07-18 15:30:00	5542.15
2014-07-18 16:00:00	5725.09
2014-07-18 16:30:00	5958.87
2014-07-18 17:00:00	6282.31
2014-07-18 17:30:00	6640.65
2014-07-18 18:00:00	6912.25
2014-07-18 18:30:00	6968.74
2014-07-18 19:00:00	6982.58
2014-07-18 19:30:00	6963.02
2014-07-18 20:00:00	6971.56
2014-07-18 20:30:00	6968.01
2014-07-18 21:00:00	6850.75
2014-07-18 21:30:00	6684.68
2014-07-18 22:00:00	6423.92
2014-07-18 22:30:00	6260.62
2014-07-18 23:00:00	6056.68
2014-07-18 23:30:00	5874.05
2014-07-19	5628.94
2014-07-19 00:30:00	5419.27
2014-07-19 01:00:00	5278.29
2014-07-19 01:30:00	5059.02
2014-07-19 02:00:00	4909.19
2014-07-19 02:30:00	4794.33
2014-07-19 03:00:00	4732.84
2014-07-19 03:30:00	4682.25
2014-07-19 04:00:00	4659.23
2014-07-19 04:30:00	4717.06
2014-07-19 05:00:00	4768.4
2014-07-19 05:30:00	4884.38
2014-07-19 06:00:00	5036.16
2014-07-19 06:30:00	5257.34
2014-07-19 07:00:00	5475.65
2014-07-19 07:30:00	5797.46
2014-07-19 08:00:00	5934.38
2014-07-19 08:30:00	5951.57
2014-07-19 09:00:00	5937.5
2014-07-19 09:30:00	5845.76
2014-07-19 10:00:00	5654.89
2014-07-19 10:30:00	5452.08
2014-07-19 11:00:00	5247.42
2014-07-19 11:30:00	5077.44
2014-07-19 12:00:00	4977.02
2014-07-19 12:30:00	4918.14
2014-07-19 13:00:00	4865.31
2014-07-19 13:30:00	4815.16
2014-07-19 14:00:00	4850.61
2014-07-19 14:30:00	4897.43
2014-07-19 15:00:00	4975.23
2014-07-19 15:30:00	5095.33
2014-07-19 16:00:00	5266.36
2014-07-19 16:30:00	5476.02
2014-07-19 17:00:00	5822.03
2014-07-19 17:30:00	6192.85
2014-07-19 18:00:00	6545.1
2014-07-19 18:30:00	6627.82
2014-07-19 19:00:00	6673.04
2014-07-19 19:30:00	6607.59
2014-07-19 20:00:00	6567.19
2014-07-19 20:30:00	6589.11
2014-07-19 21:00:00	6488.35
2014-07-19 21:30:00	6374.19
2014-07-19 22:00:00	6298.37
2014-07-19 22:30:00	6072.52
2014-07-19 23:00:00	5935.27
2014-07-19 23:30:00	5810.17
2014-07-20	5606.03
2014-07-20 00:30:00	5448.43
2014-07-20 01:00:00	5277.1
2014-07-20 01:30:00	5089.77
2014-07-20 02:00:00	4932.61
2014-07-20 02:30:00	4818.99
2014-07-20 03:00:00	4754.7
2014-07-20 03:30:00	4725.46
2014-07-20 04:00:00	4689.17
2014-07-20 04:30:00	4726.22
2014-07-20 05:00:00	4739.63
2014-07-20 05:30:00	4818.88
2014-07-20 06:00:00	4974.34
2014-07-20 06:30:00	5111.55
2014-07-20 07:00:00	5219.53
2014-07-20 07:30:00	5435.42
2014-07-20 08:00:00	5566.81
2014-07-20 08:30:00	5614.08
2014-07-20 09:00:00	5609.31
2014-07-20 09:30:00	5581.28
2014-07-20 10:00:00	5415.73
2014-07-20 10:30:00	5242.97
2014-07-20 11:00:00	5093.27
2014-07-20 11:30:00	4986.23
2014-07-20 12:00:00	4883.98
2014-07-20 12:30:00	4819.51
2014-07-20 13:00:00	4830.61
2014-07-20 13:30:00	4804.22
2014-07-20 14:00:00	4800.8
2014-07-20 14:30:00	4912.04
2014-07-20 15:00:00	4999.34
2014-07-20 15:30:00	5108.17
2014-07-20 16:00:00	5258.99
2014-07-20 16:30:00	5529.99
2014-07-20 17:00:00	5841.03
2014-07-20 17:30:00	6187.73
2014-07-20 18:00:00	6537.6
2014-07-20 18:30:00	6697.61
2014-07-20 19:00:00	6694.65
2014-07-20 19:30:00	6616.39
2014-07-20 20:00:00	6593.31
2014-07-20 20:30:00	6597.67
2014-07-20 21:00:00	6412.66
2014-07-20 21:30:00	6261.94
2014-07-20 22:00:00	6090.36
2014-07-20 22:30:00	5843.7
2014-07-20 23:00:00	5650.2
2014-07-20 23:30:00	5523.68
2014-07-21	5307.65
2014-07-21 00:30:00	5171.68
2014-07-21 01:00:00	5050.29
2014-07-21 01:30:00	4889.68
2014-07-21 02:00:00	4760.92
2014-07-21 02:30:00	4676.85
2014-07-21 03:00:00	4623.88
2014-07-21 03:30:00	4594.97
2014-07-21 04:00:00	4568.95
2014-07-21 04:30:00	4683.55
2014-07-21 05:00:00	4791.54
2014-07-21 05:30:00	5073.28
2014-07-21 06:00:00	5397.94
2014-07-21 06:30:00	5916.23
2014-07-21 07:00:00	6265.08
2014-07-21 07:30:00	6668.39
2014-07-21 08:00:00	6746.32
2014-07-21 08:30:00	6515.46
2014-07-21 09:00:00	6298.35
2014-07-21 09:30:00	6043.37
2014-07-21 10:00:00	5828.68
2014-07-21 10:30:00	5685.07
2014-07-21 11:00:00	5612.92
2014-07-21 11:30:00	5548.34
2014-07-21 12:00:00	5619.23
2014-07-21 12:30:00	5651.27
2014-07-21 13:00:00	5656.61
2014-07-21 13:30:00	5662.39
2014-07-21 14:00:00	5664.02
2014-07-21 14:30:00	5719.17
2014-07-21 15:00:00	5725.55
2014-07-21 15:30:00	5762.35
2014-07-21 16:00:00	5923.38
2014-07-21 16:30:00	6084.63
2014-07-21 17:00:00	6416.5
2014-07-21 17:30:00	6678.14
2014-07-21 18:00:00	6945.76
2014-07-21 18:30:00	7035.88
2014-07-21 19:00:00	7022.99
2014-07-21 19:30:00	6857.02
2014-07-21 20:00:00	6868.09
2014-07-21 20:30:00	6844.87
2014-07-21 21:00:00	6703.41
2014-07-21 21:30:00	6523.52
2014-07-21 22:00:00	6300.57
2014-07-21 22:30:00	6053.1
2014-07-21 23:00:00	5855.82
2014-07-21 23:30:00	5712.89
2014-07-22	5502.37
2014-07-22 00:30:00	5381.64
2014-07-22 01:00:00	5211.69
2014-07-22 01:30:00	5032.66
2014-07-22 02:00:00	4873.04
2014-07-22 02:30:00	4779.29
2014-07-22 03:00:00	4738.02
2014-07-22 03:30:00	4699.42
2014-07-22 04:00:00	4739.77
2014-07-22 04:30:00	4763.16
2014-07-22 05:00:00	4865.3
2014-07-22 05:30:00	5162.03
2014-07-22 06:00:00	5477.62
2014-07-22 06:30:00	5999.5
2014-07-22 07:00:00	6421.39
2014-07-22 07:30:00	6829.57
2014-07-22 08:00:00	6796.35
2014-07-22 08:30:00	6517.74
2014-07-22 09:00:00	6316.37
2014-07-22 09:30:00	6091.47
2014-07-22 10:00:00	5927.7
2014-07-22 10:30:00	5830.07
2014-07-22 11:00:00	5743.15
2014-07-22 11:30:00	5640.34
2014-07-22 12:00:00	5606.93
2014-07-22 12:30:00	5579.54
2014-07-22 13:00:00	5592.33
2014-07-22 13:30:00	5599.86
2014-07-22 14:00:00	5615.2
2014-07-22 14:30:00	5657.44
2014-07-22 15:00:00	5687.05
2014-07-22 15:30:00	5823.67
2014-07-22 16:00:00	5983
2014-07-22 16:30:00	6199.97
2014-07-22 17:00:00	6473.42
2014-07-22 17:30:00	6722.41
2014-07-22 18:00:00	6985.77
2014-07-22 18:30:00	7026.1
2014-07-22 19:00:00	7060.9
2014-07-22 19:30:00	6965.57
2014-07-22 20:00:00	6945.75
2014-07-22 20:30:00	6938.84
2014-07-22 21:00:00	6744.88
2014-07-22 21:30:00	6586.2
2014-07-22 22:00:00	6345.65
2014-07-22 22:30:00	6057.51
2014-07-22 23:00:00	5878.61
2014-07-22 23:30:00	5674.64
2014-07-23	5462.86
2014-07-23 00:30:00	5280.76
2014-07-23 01:00:00	5142.16
2014-07-23 01:30:00	4987.29
2014-07-23 02:00:00	4905.53
2014-07-23 02:30:00	4770.36
2014-07-23 03:00:00	4724.84
2014-07-23 03:30:00	4673.84
2014-07-23 04:00:00	4679.81
2014-07-23 04:30:00	4764.04
2014-07-23 05:00:00	4924.3
2014-07-23 05:30:00	5171.45
2014-07-23 06:00:00	5519.3
2014-07-23 06:30:00	6022.2
2014-07-23 07:00:00	6467.01
2014-07-23 07:30:00	6870.13
2014-07-23 08:00:00	6885.34
2014-07-23 08:30:00	6634.64
2014-07-23 09:00:00	6316.51
2014-07-23 09:30:00	6072.59
2014-07-23 10:00:00	5853.09
2014-07-23 10:30:00	5753.02
2014-07-23 11:00:00	5593.53
2014-07-23 11:30:00	5499.28
2014-07-23 12:00:00	5462.69
2014-07-23 12:30:00	5435.1
2014-07-23 13:00:00	5459.48
2014-07-23 13:30:00	5481.75
2014-07-23 14:00:00	5522.38
2014-07-23 14:30:00	5487.55
2014-07-23 15:00:00	5556.65
2014-07-23 15:30:00	5649
2014-07-23 16:00:00	5762.41
2014-07-23 16:30:00	5990.74
2014-07-23 17:00:00	6255.36
2014-07-23 17:30:00	6587.5
2014-07-23 18:00:00	6856.3
2014-07-23 18:30:00	6951.32
2014-07-23 19:00:00	7012.64
2014-07-23 19:30:00	6877.34
2014-07-23 20:00:00	6797.73
2014-07-23 20:30:00	6807.73
2014-07-23 21:00:00	6664
2014-07-23 21:30:00	6496.98
2014-07-23 22:00:00	6251.18
2014-07-23 22:30:00	6038.06
2014-07-23 23:00:00	5833.03
2014-07-23 23:30:00	5684.75
2014-07-24	5434
2014-07-24 00:30:00	5212.13
2014-07-24 01:00:00	5090.9
2014-07-24 01:30:00	4928.14
2014-07-24 02:00:00	4791.8
2014-07-24 02:30:00	4671.26
2014-07-24 03:00:00	4624.58
2014-07-24 03:30:00	4597.9
2014-07-24 04:00:00	4601.93
2014-07-24 04:30:00	4689.09
2014-07-24 05:00:00	4812.32
2014-07-24 05:30:00	5083.86
2014-07-24 06:00:00	5354.58
2014-07-24 06:30:00	5801.76
2014-07-24 07:00:00	6269.35
2014-07-24 07:30:00	6573.43
2014-07-24 08:00:00	6598.32
2014-07-24 08:30:00	6328.52
2014-07-24 09:00:00	6035.19
2014-07-24 09:30:00	5895.19
2014-07-24 10:00:00	5753.07
2014-07-24 10:30:00	5602.76
2014-07-24 11:00:00	5536.24
2014-07-24 11:30:00	5528.97
2014-07-24 12:00:00	5469.62
2014-07-24 12:30:00	5452.45
2014-07-24 13:00:00	5418.38
2014-07-24 13:30:00	5444.6
2014-07-24 14:00:00	5515.28
2014-07-24 14:30:00	5581.03
2014-07-24 15:00:00	5574.75
2014-07-24 15:30:00	5644.54
2014-07-24 16:00:00	5737.74
2014-07-24 16:30:00	5904.45
2014-07-24 17:00:00	6125.78
2014-07-24 17:30:00	6340.69
2014-07-24 18:00:00	6678.37
2014-07-24 18:30:00	6777
2014-07-24 19:00:00	6830.96
2014-07-24 19:30:00	6701.92
2014-07-24 20:00:00	6591.62
2014-07-24 20:30:00	6643.48
2014-07-24 21:00:00	6487.97
2014-07-24 21:30:00	6323.55
2014-07-24 22:00:00	6123.65
2014-07-24 22:30:00	5943.53
2014-07-24 23:00:00	5812.36
2014-07-24 23:30:00	5649.05
2014-07-25	5446.4
2014-07-25 00:30:00	5303.55
2014-07-25 01:00:00	5162.94
2014-07-25 01:30:00	4988.28
2014-07-25 02:00:00	4834.43
2014-07-25 02:30:00	4732.06
2014-07-25 03:00:00	4685.21
2014-07-25 03:30:00	4668.69
2014-07-25 04:00:00	4653.91
2014-07-25 04:30:00	4707.34
2014-07-25 05:00:00	4851.18
2014-07-25 05:30:00	5161.03
2014-07-25 06:00:00	5427.93
2014-07-25 06:30:00	5845.83
2014-07-25 07:00:00	6249.91
2014-07-25 07:30:00	6637.44
2014-07-25 08:00:00	6622.54
2014-07-25 08:30:00	6364.34
2014-07-25 09:00:00	6134.55
2014-07-25 09:30:00	5923.92
2014-07-25 10:00:00	5759.98
2014-07-25 10:30:00	5677.28
2014-07-25 11:00:00	5655.8
2014-07-25 11:30:00	5579.99
2014-07-25 12:00:00	5534.25
2014-07-25 12:30:00	5513.29
2014-07-25 13:00:00	5494.15
2014-07-25 13:30:00	5509.32
2014-07-25 14:00:00	5517.98
2014-07-25 14:30:00	5566.23
2014-07-25 15:00:00	5594.97
2014-07-25 15:30:00	5670.72
2014-07-25 16:00:00	5786.52
2014-07-25 16:30:00	5961.8
2014-07-25 17:00:00	6196
2014-07-25 17:30:00	6318.01
2014-07-25 18:00:00	6482.61
2014-07-25 18:30:00	6485.93
2014-07-25 19:00:00	6541.9
2014-07-25 19:30:00	6366.31
2014-07-25 20:00:00	6341.47
2014-07-25 20:30:00	6288.18
2014-07-25 21:00:00	6177.21
2014-07-25 21:30:00	6027.26
2014-07-25 22:00:00	5877.38
2014-07-25 22:30:00	5725.06
2014-07-25 23:00:00	5621.54
2014-07-25 23:30:00	5508.27
2014-07-26	5337.18
2014-07-26 00:30:00	5198.59
2014-07-26 01:00:00	5059.34
2014-07-26 01:30:00	4885.64
2014-07-26 02:00:00	4726.49
2014-07-26 02:30:00	4613.6
2014-07-26 03:00:00	4524.4
2014-07-26 03:30:00	4507.84
2014-07-26 04:00:00	4502.28
2014-07-26 04:30:00	4526.33
2014-07-26 05:00:00	4593.63
2014-07-26 05:30:00	4662.73
2014-07-26 06:00:00	4802.03
2014-07-26 06:30:00	4953.35
2014-07-26 07:00:00	5077.25
2014-07-26 07:30:00	5388.58
2014-07-26 08:00:00	5556.24
2014-07-26 08:30:00	5616.04
2014-07-26 09:00:00	5699.38
2014-07-26 09:30:00	5758.46
2014-07-26 10:00:00	5734.67
2014-07-26 10:30:00	5674.91
2014-07-26 11:00:00	5562.57
2014-07-26 11:30:00	5465.04
2014-07-26 12:00:00	5461.65
2014-07-26 12:30:00	5368.18
2014-07-26 13:00:00	5375.36
2014-07-26 13:30:00	5322.5
2014-07-26 14:00:00	5284.71
2014-07-26 14:30:00	5295.86
2014-07-26 15:00:00	5288.45
2014-07-26 15:30:00	5320.83
2014-07-26 16:00:00	5428.48
2014-07-26 16:30:00	5618.84
2014-07-26 17:00:00	5903.6
2014-07-26 17:30:00	6165.97
2014-07-26 18:00:00	6268.76
2014-07-26 18:30:00	6253.52
2014-07-26 19:00:00	6235.83
2014-07-26 19:30:00	6104.43
2014-07-26 20:00:00	6097.85
2014-07-26 20:30:00	6092.15
2014-07-26 21:00:00	5933.29
2014-07-26 21:30:00	5856.84
2014-07-26 22:00:00	5721.29
2014-07-26 22:30:00	5534.47
2014-07-26 23:00:00	5473.46
2014-07-26 23:30:00	5423.17
2014-07-27	5220.65
2014-07-27 00:30:00	5065.46
2014-07-27 01:00:00	4991.62
2014-07-27 01:30:00	4776.44
2014-07-27 02:00:00	4667.74
2014-07-27 02:30:00	4540.49
2014-07-27 03:00:00	4463.25
2014-07-27 03:30:00	4404.71
2014-07-27 04:00:00	4422.04
2014-07-27 04:30:00	4446.89
2014-07-27 05:00:00	4467.36
2014-07-27 05:30:00	4576.66
2014-07-27 06:00:00	4662.94
2014-07-27 06:30:00	4660.17
2014-07-27 07:00:00	4794.78
2014-07-27 07:30:00	5036.66
2014-07-27 08:00:00	5049.52
2014-07-27 08:30:00	5101.78
2014-07-27 09:00:00	5177.87
2014-07-27 09:30:00	5155.95
2014-07-27 10:00:00	5048.96
2014-07-27 10:30:00	4993.66
2014-07-27 11:00:00	4854.27
2014-07-27 11:30:00	4806.31
2014-07-27 12:00:00	4709.33
2014-07-27 12:30:00	4688.02
2014-07-27 13:00:00	4646.07
2014-07-27 13:30:00	4629.39
2014-07-27 14:00:00	4626.76
2014-07-27 14:30:00	4712.63
2014-07-27 15:00:00	4793.19
2014-07-27 15:30:00	4904.92
2014-07-27 16:00:00	5120.05
2014-07-27 16:30:00	5283.14
2014-07-27 17:00:00	5580.36
2014-07-27 17:30:00	5868.54
2014-07-27 18:00:00	6191.9
2014-07-27 18:30:00	6348.3
2014-07-27 19:00:00	6375.16
2014-07-27 19:30:00	6201.88
2014-07-27 20:00:00	6162.84
2014-07-27 20:30:00	6179.3
2014-07-27 21:00:00	6087.37
2014-07-27 21:30:00	5890.66
2014-07-27 22:00:00	5701.12
2014-07-27 22:30:00	5519.86
2014-07-27 23:00:00	5392.65
2014-07-27 23:30:00	5279.41
2014-07-28	5100.73
2014-07-28 00:30:00	4995.03
2014-07-28 01:00:00	4882.23
2014-07-28 01:30:00	4724.79
2014-07-28 02:00:00	4598.79
2014-07-28 02:30:00	4488.59
2014-07-28 03:00:00	4467.37
2014-07-28 03:30:00	4422.95
2014-07-28 04:00:00	4447.11
2014-07-28 04:30:00	4508.1
2014-07-28 05:00:00	4638.72
2014-07-28 05:30:00	4900.96
2014-07-28 06:00:00	5228.51
2014-07-28 06:30:00	5697.14
2014-07-28 07:00:00	6169.05
2014-07-28 07:30:00	6602.31
2014-07-28 08:00:00	6646.08
2014-07-28 08:30:00	6378.3
2014-07-28 09:00:00	6205.24
2014-07-28 09:30:00	5960.22
2014-07-28 10:00:00	5757.31
2014-07-28 10:30:00	5693.51
2014-07-28 11:00:00	5588.89
2014-07-28 11:30:00	5495.85
2014-07-28 12:00:00	5481.71
2014-07-28 12:30:00	5470.08
2014-07-28 13:00:00	5448.13
2014-07-28 13:30:00	5435.76
2014-07-28 14:00:00	5486.98
2014-07-28 14:30:00	5545.61
2014-07-28 15:00:00	5574.56
2014-07-28 15:30:00	5633.26
2014-07-28 16:00:00	5787.19
2014-07-28 16:30:00	5960.47
2014-07-28 17:00:00	6215.16
2014-07-28 17:30:00	6484.82
2014-07-28 18:00:00	6732.36
2014-07-28 18:30:00	6798.83
2014-07-28 19:00:00	6809.09
2014-07-28 19:30:00	6705.03
2014-07-28 20:00:00	6628.35
2014-07-28 20:30:00	6699.77
2014-07-28 21:00:00	6569.17
2014-07-28 21:30:00	6380.28
2014-07-28 22:00:00	6182
2014-07-28 22:30:00	5948.52
2014-07-28 23:00:00	5745.87
2014-07-28 23:30:00	5580.32
2014-07-29	5406.71
2014-07-29 00:30:00	5211.41
2014-07-29 01:00:00	5079.2
2014-07-29 01:30:00	4931.86
2014-07-29 02:00:00	4751.72
2014-07-29 02:30:00	4697.25
2014-07-29 03:00:00	4677.81
2014-07-29 03:30:00	4624.74
2014-07-29 04:00:00	4647.44
2014-07-29 04:30:00	4695.94
2014-07-29 05:00:00	4808.45
2014-07-29 05:30:00	5049.82
2014-07-29 06:00:00	5402.26
2014-07-29 06:30:00	5885.99
2014-07-29 07:00:00	6339.93
2014-07-29 07:30:00	6752.59
2014-07-29 08:00:00	6731.78
2014-07-29 08:30:00	6436.93
2014-07-29 09:00:00	6137.15
2014-07-29 09:30:00	5988.93
2014-07-29 10:00:00	5805.4
2014-07-29 10:30:00	5656.25
2014-07-29 11:00:00	5575.35
2014-07-29 11:30:00	5487.6
2014-07-29 12:00:00	5407.07
2014-07-29 12:30:00	5331.37
2014-07-29 13:00:00	5360.66
2014-07-29 13:30:00	5405.96
2014-07-29 14:00:00	5455.03
2014-07-29 14:30:00	5529.63
2014-07-29 15:00:00	5581.58
2014-07-29 15:30:00	5653.65
2014-07-29 16:00:00	5777.83
2014-07-29 16:30:00	5948.74
2014-07-29 17:00:00	6158.71
2014-07-29 17:30:00	6385.01
2014-07-29 18:00:00	6606.84
2014-07-29 18:30:00	6714.94
2014-07-29 19:00:00	6782.41
2014-07-29 19:30:00	6586.52
2014-07-29 20:00:00	6571.74
2014-07-29 20:30:00	6608.95
2014-07-29 21:00:00	6530.68
2014-07-29 21:30:00	6314.99
2014-07-29 22:00:00	6100.85
2014-07-29 22:30:00	5893.52
2014-07-29 23:00:00	5697.54
2014-07-29 23:30:00	5512.56
2014-07-30	5321.37
2014-07-30 00:30:00	5119.33
2014-07-30 01:00:00	5065.99
2014-07-30 01:30:00	4896.54
2014-07-30 02:00:00	4795.08
2014-07-30 02:30:00	4653.06
2014-07-30 03:00:00	4600.98
2014-07-30 03:30:00	4549.18
2014-07-30 04:00:00	4568.39
2014-07-30 04:30:00	4647.55
2014-07-30 05:00:00	4768.98
2014-07-30 05:30:00	5040.06
2014-07-30 06:00:00	5353.26
2014-07-30 06:30:00	5868.94
2014-07-30 07:00:00	6312.74
2014-07-30 07:30:00	6716.72
2014-07-30 08:00:00	6674.36
2014-07-30 08:30:00	6411.03
2014-07-30 09:00:00	6139.49
2014-07-30 09:30:00	5891.42
2014-07-30 10:00:00	5756.33
2014-07-30 10:30:00	5582.45
2014-07-30 11:00:00	5433.12
2014-07-30 11:30:00	5369.23
2014-07-30 12:00:00	5354.37
2014-07-30 12:30:00	5324.51
2014-07-30 13:00:00	5288.43
2014-07-30 13:30:00	5335.81
2014-07-30 14:00:00	5267.29
2014-07-30 14:30:00	5378.48
2014-07-30 15:00:00	5483.61
2014-07-30 15:30:00	5542.68
2014-07-30 16:00:00	5710.74
2014-07-30 16:30:00	5914.24
2014-07-30 17:00:00	6115.62
2014-07-30 17:30:00	6282.54
2014-07-30 18:00:00	6624.87
2014-07-30 18:30:00	6712.71
2014-07-30 19:00:00	6719.59
2014-07-30 19:30:00	6619.44
2014-07-30 20:00:00	6525.96
2014-07-30 20:30:00	6549.61
2014-07-30 21:00:00	6404.16
2014-07-30 21:30:00	6279.01
2014-07-30 22:00:00	6139.72
2014-07-30 22:30:00	5857.47
2014-07-30 23:00:00	5717.39
2014-07-30 23:30:00	5589.07
2014-07-31	5370.36
2014-07-31 00:30:00	5198.52
2014-07-31 01:00:00	5075.7
2014-07-31 01:30:00	4852.03
2014-07-31 02:00:00	4760.93
2014-07-31 02:30:00	4687.76
2014-07-31 03:00:00	4654.09
2014-07-31 03:30:00	4631.09
2014-07-31 04:00:00	4627.74
2014-07-31 04:30:00	4745.26
2014-07-31 05:00:00	4869.77
2014-07-31 05:30:00	5137.21
2014-07-31 06:00:00	5483.66
2014-07-31 06:30:00	5896.14
2014-07-31 07:00:00	6353.99
2014-07-31 07:30:00	6773.78
2014-07-31 08:00:00	6736.08
2014-07-31 08:30:00	6488.86
2014-07-31 09:00:00	6226.1
2014-07-31 09:30:00	6078.08
2014-07-31 10:00:00	5862.97
2014-07-31 10:30:00	5696.3
2014-07-31 11:00:00	5577.74
2014-07-31 11:30:00	5468.94
2014-07-31 12:00:00	5434.29
2014-07-31 12:30:00	5396.38
2014-07-31 13:00:00	5398.52
2014-07-31 13:30:00	5412.38
2014-07-31 14:00:00	5462.17
2014-07-31 14:30:00	5483.38
2014-07-31 15:00:00	5539.94
2014-07-31 15:30:00	5638.72
2014-07-31 16:00:00	5822.18
2014-07-31 16:30:00	5993.17
2014-07-31 17:00:00	6181.3
2014-07-31 17:30:00	6385.55
2014-07-31 18:00:00	6611.76
2014-07-31 18:30:00	6748.43
2014-07-31 19:00:00	6759.36
2014-07-31 19:30:00	6634.44
2014-07-31 20:00:00	6564.37
2014-07-31 20:30:00	6548.04
2014-07-31 21:00:00	6418.46
2014-07-31 21:30:00	6239.31
2014-07-31 22:00:00	6050.13
2014-07-31 22:30:00	5870.44
2014-07-31 23:00:00	5680.53
2014-07-31 23:30:00	5547.11
2014-08-01	5326.03

## Sheet: QLD-Oct
SETTLEMENTDATE	TOTALDEMAND
2014-10-01 00:30:00	4943.53
2014-10-01 01:00:00	4783.81
2014-10-01 01:30:00	4658.17
2014-10-01 02:00:00	4563.07
2014-10-01 02:30:00	4478.15
2014-10-01 03:00:00	4407.28
2014-10-01 03:30:00	4380.46
2014-10-01 04:00:00	4406.91
2014-10-01 04:30:00	4445.63
2014-10-01 05:00:00	4547.37
2014-10-01 05:30:00	4734.47
2014-10-01 06:00:00	4876.31
2014-10-01 06:30:00	5125.62
2014-10-01 07:00:00	5320.06
2014-10-01 07:30:00	5497.99
2014-10-01 08:00:00	5563.25
2014-10-01 08:30:00	5540.25
2014-10-01 09:00:00	5569.87
2014-10-01 09:30:00	5548.18
2014-10-01 10:00:00	5518.07
2014-10-01 10:30:00	5510.53
2014-10-01 11:00:00	5500.33
2014-10-01 11:30:00	5591.6
2014-10-01 12:00:00	5607.05
2014-10-01 12:30:00	5635.35
2014-10-01 13:00:00	5694.31
2014-10-01 13:30:00	5764.28
2014-10-01 14:00:00	5802.57
2014-10-01 14:30:00	5770.63
2014-10-01 15:00:00	6015.64
2014-10-01 15:30:00	6130.44
2014-10-01 16:00:00	6226.61
2014-10-01 16:30:00	6310.53
2014-10-01 17:00:00	6450.59
2014-10-01 17:30:00	6427.8
2014-10-01 18:00:00	6427.69
2014-10-01 18:30:00	6548.76
2014-10-01 19:00:00	6620.6
2014-10-01 19:30:00	6442
2014-10-01 20:00:00	6323.09
2014-10-01 20:30:00	6223.54
2014-10-01 21:00:00	6042.06
2014-10-01 21:30:00	5873.91
2014-10-01 22:00:00	5687.59
2014-10-01 22:30:00	5519.84
2014-10-01 23:00:00	5412.28
2014-10-01 23:30:00	5324.55
2014-10-02	5132.94
2014-10-02 00:30:00	4964.59
2014-10-02 01:00:00	4828.34
2014-10-02 01:30:00	4664.47
2014-10-02 02:00:00	4534.48
2014-10-02 02:30:00	4501.06
2014-10-02 03:00:00	4446.87
2014-10-02 03:30:00	4427.63
2014-10-02 04:00:00	4470.72
2014-10-02 04:30:00	4536.24
2014-10-02 05:00:00	4565.64
2014-10-02 05:30:00	4767.56
2014-10-02 06:00:00	4907.98
2014-10-02 06:30:00	5136.85
2014-10-02 07:00:00	5398.9
2014-10-02 07:30:00	5588.74
2014-10-02 08:00:00	5637.55
2014-10-02 08:30:00	5729.04
2014-10-02 09:00:00	5708.06
2014-10-02 09:30:00	5701.23
2014-10-02 10:00:00	5628.68
2014-10-02 10:30:00	5605.79
2014-10-02 11:00:00	5571.32
2014-10-02 11:30:00	5522.76
2014-10-02 12:00:00	5544.94
2014-10-02 12:30:00	5550.15
2014-10-02 13:00:00	5594.09
2014-10-02 13:30:00	5582.47
2014-10-02 14:00:00	5595
2014-10-02 14:30:00	5659.2
2014-10-02 15:00:00	5677.13
2014-10-02 15:30:00	5720.11
2014-10-02 16:00:00	5822.47
2014-10-02 16:30:00	5894.23
2014-10-02 17:00:00	6084.39
2014-10-02 17:30:00	6140.98
2014-10-02 18:00:00	6236.9
2014-10-02 18:30:00	6415.27
2014-10-02 19:00:00	6534.3
2014-10-02 19:30:00	6434.56
2014-10-02 20:00:00	6343.1
2014-10-02 20:30:00	6256.94
2014-10-02 21:00:00	6044.3
2014-10-02 21:30:00	5868.71
2014-10-02 22:00:00	5703.01
2014-10-02 22:30:00	5528.49
2014-10-02 23:00:00	5421.05
2014-10-02 23:30:00	5366.72
2014-10-03	5183.21
2014-10-03 00:30:00	5032.52
2014-10-03 01:00:00	4865.58
2014-10-03 01:30:00	4681.17
2014-10-03 02:00:00	4567.97
2014-10-03 02:30:00	4495.68
2014-10-03 03:00:00	4459.38
2014-10-03 03:30:00	4465.31
2014-10-03 04:00:00	4478.99
2014-10-03 04:30:00	4532.52
2014-10-03 05:00:00	4625.89
2014-10-03 05:30:00	4779.85
2014-10-03 06:00:00	4959.45
2014-10-03 06:30:00	5125.89
2014-10-03 07:00:00	5347.61
2014-10-03 07:30:00	5531.29
2014-10-03 08:00:00	5617.22
2014-10-03 08:30:00	5637.77
2014-10-03 09:00:00	5620.5
2014-10-03 09:30:00	5589.11
2014-10-03 10:00:00	5554.53
2014-10-03 10:30:00	5489.06
2014-10-03 11:00:00	5443.17
2014-10-03 11:30:00	5450.12
2014-10-03 12:00:00	5453.59
2014-10-03 12:30:00	5473.44
2014-10-03 13:00:00	5515.89
2014-10-03 13:30:00	5516.97
2014-10-03 14:00:00	5618.13
2014-10-03 14:30:00	5659.62
2014-10-03 15:00:00	5708.67
2014-10-03 15:30:00	5788.67
2014-10-03 16:00:00	5854.93
2014-10-03 16:30:00	6000.24
2014-10-03 17:00:00	6169.35
2014-10-03 17:30:00	6215.55
2014-10-03 18:00:00	6160.88
2014-10-03 18:30:00	6276.53
2014-10-03 19:00:00	6357.22
2014-10-03 19:30:00	6239.43
2014-10-03 20:00:00	6165.19
2014-10-03 20:30:00	6085.44
2014-10-03 21:00:00	5920.53
2014-10-03 21:30:00	5781.35
2014-10-03 22:00:00	5625.48
2014-10-03 22:30:00	5535.32
2014-10-03 23:00:00	5418.83
2014-10-03 23:30:00	5308.7
2014-10-04	5155.06
2014-10-04 00:30:00	5000.21
2014-10-04 01:00:00	4852.14
2014-10-04 01:30:00	4688.59
2014-10-04 02:00:00	4562.68
2014-10-04 02:30:00	4464.58
2014-10-04 03:00:00	4474.17
2014-10-04 03:30:00	4456.64
2014-10-04 04:00:00	4420.2
2014-10-04 04:30:00	4440.76
2014-10-04 05:00:00	4502.67
2014-10-04 05:30:00	4574.64
2014-10-04 06:00:00	4536.88
2014-10-04 06:30:00	4641.53
2014-10-04 07:00:00	4773.12
2014-10-04 07:30:00	4959.64
2014-10-04 08:00:00	5110.76
2014-10-04 08:30:00	5185
2014-10-04 09:00:00	5271.54
2014-10-04 09:30:00	5265.92
2014-10-04 10:00:00	5211.12
2014-10-04 10:30:00	5157.02
2014-10-04 11:00:00	5121.2
2014-10-04 11:30:00	5055.18
2014-10-04 12:00:00	4978.54
2014-10-04 12:30:00	4987.13
2014-10-04 13:00:00	4933.69
2014-10-04 13:30:00	4903.54
2014-10-04 14:00:00	4925.15
2014-10-04 14:30:00	4973.21
2014-10-04 15:00:00	5033.09
2014-10-04 15:30:00	5133.59
2014-10-04 16:00:00	5257.98
2014-10-04 16:30:00	5430.86
2014-10-04 17:00:00	5610.21
2014-10-04 17:30:00	5639.15
2014-10-04 18:00:00	5756.37
2014-10-04 18:30:00	5934.5
2014-10-04 19:00:00	5999.13
2014-10-04 19:30:00	5898.52
2014-10-04 20:00:00	5845.54
2014-10-04 20:30:00	5770.26
2014-10-04 21:00:00	5581.63
2014-10-04 21:30:00	5490.46
2014-10-04 22:00:00	5418.02
2014-10-04 22:30:00	5334.44
2014-10-04 23:00:00	5271.31
2014-10-04 23:30:00	5194.75
2014-10-05	5034.51
2014-10-05 00:30:00	4880.51
2014-10-05 01:00:00	4743.73
2014-10-05 01:30:00	4631.63
2014-10-05 02:00:00	4480.34
2014-10-05 02:30:00	4396.55
2014-10-05 03:00:00	4367.04
2014-10-05 03:30:00	4366.5
2014-10-05 04:00:00	4340.13
2014-10-05 04:30:00	4344.09
2014-10-05 05:00:00	4393.79
2014-10-05 05:30:00	4444.15
2014-10-05 06:00:00	4422.1
2014-10-05 06:30:00	4431.24
2014-10-05 07:00:00	4505.05
2014-10-05 07:30:00	4605.51
2014-10-05 08:00:00	4684.54
2014-10-05 08:30:00	4753.31
2014-10-05 09:00:00	4794.54
2014-10-05 09:30:00	4802.72
2014-10-05 10:00:00	4763.69
2014-10-05 10:30:00	4745.85
2014-10-05 11:00:00	4729.77
2014-10-05 11:30:00	4728.84
2014-10-05 12:00:00	4733.66
2014-10-05 12:30:00	4704.93
2014-10-05 13:00:00	4724.08
2014-10-05 13:30:00	4755.59
2014-10-05 14:00:00	4825.22
2014-10-05 14:30:00	4898.93
2014-10-05 15:00:00	4963.04
2014-10-05 15:30:00	5076.27
2014-10-05 16:00:00	5225.86
2014-10-05 16:30:00	5341.37
2014-10-05 17:00:00	5506.4
2014-10-05 17:30:00	5616.25
2014-10-05 18:00:00	5697.42
2014-10-05 18:30:00	5859.25
2014-10-05 19:00:00	5904.9
2014-10-05 19:30:00	5749.91
2014-10-05 20:00:00	5700.13
2014-10-05 20:30:00	5616
2014-10-05 21:00:00	5490.96
2014-10-05 21:30:00	5463.22
2014-10-05 22:00:00	5347.77
2014-10-05 22:30:00	5323.01
2014-10-05 23:00:00	5190.36
2014-10-05 23:30:00	5132.9
2014-10-06	4965.23
2014-10-06 00:30:00	4818.65
2014-10-06 01:00:00	4698.6
2014-10-06 01:30:00	4579.34
2014-10-06 02:00:00	4448.27
2014-10-06 02:30:00	4363.45
2014-10-06 03:00:00	4334.95
2014-10-06 03:30:00	4324.72
2014-10-06 04:00:00	4312.69
2014-10-06 04:30:00	4343.56
2014-10-06 05:00:00	4354.59
2014-10-06 05:30:00	4401.2
2014-10-06 06:00:00	4392.92
2014-10-06 06:30:00	4432.6
2014-10-06 07:00:00	4450.44
2014-10-06 07:30:00	4621.11
2014-10-06 08:00:00	4698.93
2014-10-06 08:30:00	4708.99
2014-10-06 09:00:00	4800.55
2014-10-06 09:30:00	4783.67
2014-10-06 10:00:00	4777.48
2014-10-06 10:30:00	4713.9
2014-10-06 11:00:00	4724.15
2014-10-06 11:30:00	4673.55
2014-10-06 12:00:00	4641.02
2014-10-06 12:30:00	4701.73
2014-10-06 13:00:00	4707.07
2014-10-06 13:30:00	4703.55
2014-10-06 14:00:00	4738.3
2014-10-06 14:30:00	4793.03
2014-10-06 15:00:00	4949.06
2014-10-06 15:30:00	5071.26
2014-10-06 16:00:00	5174.55
2014-10-06 16:30:00	5408.13
2014-10-06 17:00:00	5619.26
2014-10-06 17:30:00	5735.48
2014-10-06 18:00:00	5930.19
2014-10-06 18:30:00	6103.23
2014-10-06 19:00:00	6225.84
2014-10-06 19:30:00	6104.54
2014-10-06 20:00:00	5988.94
2014-10-06 20:30:00	5904.3
2014-10-06 21:00:00	5729.38
2014-10-06 21:30:00	5584.73
2014-10-06 22:00:00	5466.13
2014-10-06 22:30:00	5339.8
2014-10-06 23:00:00	5229.25
2014-10-06 23:30:00	5155.58
2014-10-07	5004.84
2014-10-07 00:30:00	4893.92
2014-10-07 01:00:00	4747.05
2014-10-07 01:30:00	4602.9
2014-10-07 02:00:00	4504.68
2014-10-07 02:30:00	4429.46
2014-10-07 03:00:00	4373.83
2014-10-07 03:30:00	4391.61
2014-10-07 04:00:00	4384.84
2014-10-07 04:30:00	4449.43
2014-10-07 05:00:00	4526.48
2014-10-07 05:30:00	4669.98
2014-10-07 06:00:00	4829.56
2014-10-07 06:30:00	5140.4
2014-10-07 07:00:00	5402.73
2014-10-07 07:30:00	5644.56
2014-10-07 08:00:00	5607.39
2014-10-07 08:30:00	5566.26
2014-10-07 09:00:00	5557.34
2014-10-07 09:30:00	5574.21
2014-10-07 10:00:00	5560.79
2014-10-07 10:30:00	5537.11
2014-10-07 11:00:00	5450
2014-10-07 11:30:00	5556.38
2014-10-07 12:00:00	5604.05
2014-10-07 12:30:00	5646.19
2014-10-07 13:00:00	5678.97
2014-10-07 13:30:00	5767.36
2014-10-07 14:00:00	5818.2
2014-10-07 14:30:00	5910.09
2014-10-07 15:00:00	5981.85
2014-10-07 15:30:00	6092.87
2014-10-07 16:00:00	6254.17
2014-10-07 16:30:00	6423.15
2014-10-07 17:00:00	6498.69
2014-10-07 17:30:00	6555.99
2014-10-07 18:00:00	6506.55
2014-10-07 18:30:00	6615.61
2014-10-07 19:00:00	6705.36
2014-10-07 19:30:00	6563.67
2014-10-07 20:00:00	6459.61
2014-10-07 20:30:00	6390.2
2014-10-07 21:00:00	6160.72
2014-10-07 21:30:00	5986.1
2014-10-07 22:00:00	5779.39
2014-10-07 22:30:00	5623.66
2014-10-07 23:00:00	5494.12
2014-10-07 23:30:00	5402.2
2014-10-08	5155.27
2014-10-08 00:30:00	5038.48
2014-10-08 01:00:00	4912.35
2014-10-08 01:30:00	4738.07
2014-10-08 02:00:00	4619.96
2014-10-08 02:30:00	4549.02
2014-10-08 03:00:00	4516.41
2014-10-08 03:30:00	4527.78
2014-10-08 04:00:00	4529.78
2014-10-08 04:30:00	4600.34
2014-10-08 05:00:00	4675.03
2014-10-08 05:30:00	4857.42
2014-10-08 06:00:00	5029.84
2014-10-08 06:30:00	5286.17
2014-10-08 07:00:00	5581.12
2014-10-08 07:30:00	5807.49
2014-10-08 08:00:00	5862.77
2014-10-08 08:30:00	5827.57
2014-10-08 09:00:00	5794.61
2014-10-08 09:30:00	5815.07
2014-10-08 10:00:00	5792.11
2014-10-08 10:30:00	5848.95
2014-10-08 11:00:00	5909.53
2014-10-08 11:30:00	5941.81
2014-10-08 12:00:00	6023.85
2014-10-08 12:30:00	6022.21
2014-10-08 13:00:00	6031.11
2014-10-08 13:30:00	6092.4
2014-10-08 14:00:00	6177.39
2014-10-08 14:30:00	6272.92
2014-10-08 15:00:00	6334.61
2014-10-08 15:30:00	6360.93
2014-10-08 16:00:00	6443.51
2014-10-08 16:30:00	6559.86
2014-10-08 17:00:00	6665.87
2014-10-08 17:30:00	6637.84
2014-10-08 18:00:00	6593.65
2014-10-08 18:30:00	6649.57
2014-10-08 19:00:00	6750.31
2014-10-08 19:30:00	6617.55
2014-10-08 20:00:00	6503.78
2014-10-08 20:30:00	6458.61
2014-10-08 21:00:00	6273.95
2014-10-08 21:30:00	6149.05
2014-10-08 22:00:00	5900.23
2014-10-08 22:30:00	5742.32
2014-10-08 23:00:00	5588.88
2014-10-08 23:30:00	5502.73
2014-10-09	5312
2014-10-09 00:30:00	5115.34
2014-10-09 01:00:00	4978.15
2014-10-09 01:30:00	4839.04
2014-10-09 02:00:00	4719.24
2014-10-09 02:30:00	4639.21
2014-10-09 03:00:00	4558.44
2014-10-09 03:30:00	4580.14
2014-10-09 04:00:00	4578.31
2014-10-09 04:30:00	4608.64
2014-10-09 05:00:00	4727.03
2014-10-09 05:30:00	4908.63
2014-10-09 06:00:00	5065.82
2014-10-09 06:30:00	5392.9
2014-10-09 07:00:00	5692.36
2014-10-09 07:30:00	5920.66
2014-10-09 08:00:00	5956.59
2014-10-09 08:30:00	5966.29
2014-10-09 09:00:00	5978.98
2014-10-09 09:30:00	5948.49
2014-10-09 10:00:00	5930.16
2014-10-09 10:30:00	5984.05
2014-10-09 11:00:00	5976.92
2014-10-09 11:30:00	5980.13
2014-10-09 12:00:00	5916.82
2014-10-09 12:30:00	5920.54
2014-10-09 13:00:00	5893.21
2014-10-09 13:30:00	5905.87
2014-10-09 14:00:00	5953.29
2014-10-09 14:30:00	6013.7
2014-10-09 15:00:00	6056.7
2014-10-09 15:30:00	6102.04
2014-10-09 16:00:00	6190.12
2014-10-09 16:30:00	6275.21
2014-10-09 17:00:00	6418.15
2014-10-09 17:30:00	6456.91
2014-10-09 18:00:00	6522.25
2014-10-09 18:30:00	6656.62
2014-10-09 19:00:00	6723.61
2014-10-09 19:30:00	6625.88
2014-10-09 20:00:00	6522.41
2014-10-09 20:30:00	6440.97
2014-10-09 21:00:00	6242.88
2014-10-09 21:30:00	6058.03
2014-10-09 22:00:00	5821.21
2014-10-09 22:30:00	5673.06
2014-10-09 23:00:00	5535.5
2014-10-09 23:30:00	5419.59
2014-10-10	5233.2
2014-10-10 00:30:00	5095.43
2014-10-10 01:00:00	4973.97
2014-10-10 01:30:00	4798.76
2014-10-10 02:00:00	4710.76
2014-10-10 02:30:00	4623.92
2014-10-10 03:00:00	4618.88
2014-10-10 03:30:00	4583.77
2014-10-10 04:00:00	4624.4
2014-10-10 04:30:00	4709.93
2014-10-10 05:00:00	4788.53
2014-10-10 05:30:00	4967.93
2014-10-10 06:00:00	5110.64
2014-10-10 06:30:00	5403.45
2014-10-10 07:00:00	5672.21
2014-10-10 07:30:00	5934.37
2014-10-10 08:00:00	6008.59
2014-10-10 08:30:00	5978.63
2014-10-10 09:00:00	5925.63
2014-10-10 09:30:00	5905.13
2014-10-10 10:00:00	5900.93
2014-10-10 10:30:00	5881.42
2014-10-10 11:00:00	5872.3
2014-10-10 11:30:00	5803.86
2014-10-10 12:00:00	5770
2014-10-10 12:30:00	5804.39
2014-10-10 13:00:00	5853.03
2014-10-10 13:30:00	5850.83
2014-10-10 14:00:00	5883.36
2014-10-10 14:30:00	5948.2
2014-10-10 15:00:00	5956.54
2014-10-10 15:30:00	5990.76
2014-10-10 16:00:00	6080.72
2014-10-10 16:30:00	6193.62
2014-10-10 17:00:00	6322.44
2014-10-10 17:30:00	6311.83
2014-10-10 18:00:00	6243.22
2014-10-10 18:30:00	6335.52
2014-10-10 19:00:00	6461.81
2014-10-10 19:30:00	6375.68
2014-10-10 20:00:00	6295.34
2014-10-10 20:30:00	6241.84
2014-10-10 21:00:00	6065.97
2014-10-10 21:30:00	5927.3
2014-10-10 22:00:00	5755.26
2014-10-10 22:30:00	5677.09
2014-10-10 23:00:00	5554.61
2014-10-10 23:30:00	5487.34
2014-10-11	5252.88
2014-10-11 00:30:00	5056.22
2014-10-11 01:00:00	4932.59
2014-10-11 01:30:00	4770.63
2014-10-11 02:00:00	4658.83
2014-10-11 02:30:00	4584.85
2014-10-11 03:00:00	4538.44
2014-10-11 03:30:00	4516.38
2014-10-11 04:00:00	4493.07
2014-10-11 04:30:00	4496.66
2014-10-11 05:00:00	4516.77
2014-10-11 05:30:00	4593.91
2014-10-11 06:00:00	4634.68
2014-10-11 06:30:00	4739.68
2014-10-11 07:00:00	4893.51
2014-10-11 07:30:00	5119.65
2014-10-11 08:00:00	5251.56
2014-10-11 08:30:00	5332.96
2014-10-11 09:00:00	5366.24
2014-10-11 09:30:00	5337.72
2014-10-11 10:00:00	5322.59
2014-10-11 10:30:00	5209.93
2014-10-11 11:00:00	5164.6
2014-10-11 11:30:00	5078.59
2014-10-11 12:00:00	5030.07
2014-10-11 12:30:00	5010.2
2014-10-11 13:00:00	4981.26
2014-10-11 13:30:00	5006.41
2014-10-11 14:00:00	5068.47
2014-10-11 14:30:00	5158.84
2014-10-11 15:00:00	5210.57
2014-10-11 15:30:00	5307.13
2014-10-11 16:00:00	5441.44
2014-10-11 16:30:00	5607.11
2014-10-11 17:00:00	5771.93
2014-10-11 17:30:00	5823.23
2014-10-11 18:00:00	5812.16
2014-10-11 18:30:00	6058.59
2014-10-11 19:00:00	6157.88
2014-10-11 19:30:00	6046.77
2014-10-11 20:00:00	5975.25
2014-10-11 20:30:00	5854.93
2014-10-11 21:00:00	5764.69
2014-10-11 21:30:00	5613.56
2014-10-11 22:00:00	5526.05
2014-10-11 22:30:00	5432.67
2014-10-11 23:00:00	5356.52
2014-10-11 23:30:00	5307.24
2014-10-12	5115.46
2014-10-12 00:30:00	4992.81
2014-10-12 01:00:00	4830.36
2014-10-12 01:30:00	4693.79
2014-10-12 02:00:00	4576.82
2014-10-12 02:30:00	4551.65
2014-10-12 03:00:00	4522.89
2014-10-12 03:30:00	4497.53
2014-10-12 04:00:00	4426.12
2014-10-12 04:30:00	4434.52
2014-10-12 05:00:00	4449.92
2014-10-12 05:30:00	4489.2
2014-10-12 06:00:00	4479.38
2014-10-12 06:30:00	4500.7
2014-10-12 07:00:00	4593.44
2014-10-12 07:30:00	4716.77
2014-10-12 08:00:00	4852.47
2014-10-12 08:30:00	4986.04
2014-10-12 09:00:00	5040.11
2014-10-12 09:30:00	5042.74
2014-10-12 10:00:00	5004.21
2014-10-12 10:30:00	5022.65
2014-10-12 11:00:00	4973
2014-10-12 11:30:00	4908.79
2014-10-12 12:00:00	4922.42
2014-10-12 12:30:00	4917.48
2014-10-12 13:00:00	4966.51
2014-10-12 13:30:00	4950.07
2014-10-12 14:00:00	5008.97
2014-10-12 14:30:00	5061.86
2014-10-12 15:00:00	5177.55
2014-10-12 15:30:00	5254.68
2014-10-12 16:00:00	5393.96
2014-10-12 16:30:00	5570.63
2014-10-12 17:00:00	5796.28
2014-10-12 17:30:00	5842.79
2014-10-12 18:00:00	5941.96
2014-10-12 18:30:00	6170.13
2014-10-12 19:00:00	6308.26
2014-10-12 19:30:00	6172.76
2014-10-12 20:00:00	6111.4
2014-10-12 20:30:00	6004.28
2014-10-12 21:00:00	5822.8
2014-10-12 21:30:00	5726.92
2014-10-12 22:00:00	5592.78
2014-10-12 22:30:00	5452.4
2014-10-12 23:00:00	5326.61
2014-10-12 23:30:00	5271.02
2014-10-13	5114.39
2014-10-13 00:30:00	4935.56
2014-10-13 01:00:00	4833.65
2014-10-13 01:30:00	4723.03
2014-10-13 02:00:00	4647.37
2014-10-13 02:30:00	4533.86
2014-10-13 03:00:00	4524.93
2014-10-13 03:30:00	4502.52
2014-10-13 04:00:00	4501.41
2014-10-13 04:30:00	4604.41
2014-10-13 05:00:00	4692.74
2014-10-13 05:30:00	4900.04
2014-10-13 06:00:00	5049.04
2014-10-13 06:30:00	5326.9
2014-10-13 07:00:00	5583.65
2014-10-13 07:30:00	5858.57
2014-10-13 08:00:00	5918.47
2014-10-13 08:30:00	5924.91
2014-10-13 09:00:00	5890.65
2014-10-13 09:30:00	5895.06
2014-10-13 10:00:00	5818.45
2014-10-13 10:30:00	5802.76
2014-10-13 11:00:00	5760.65
2014-10-13 11:30:00	5757.14
2014-10-13 12:00:00	5844.42
2014-10-13 12:30:00	5847.3
2014-10-13 13:00:00	5864.01
2014-10-13 13:30:00	5914.68
2014-10-13 14:00:00	5931.85
2014-10-13 14:30:00	6024.46
2014-10-13 15:00:00	6083.36
2014-10-13 15:30:00	6164.23
2014-10-13 16:00:00	6299.39
2014-10-13 16:30:00	6407.5
2014-10-13 17:00:00	6544
2014-10-13 17:30:00	6515.32
2014-10-13 18:00:00	6599.93
2014-10-13 18:30:00	6700.37
2014-10-13 19:00:00	6720.53
2014-10-13 19:30:00	6551.53
2014-10-13 20:00:00	6445.19
2014-10-13 20:30:00	6330.98
2014-10-13 21:00:00	6110.01
2014-10-13 21:30:00	5942.98
2014-10-13 22:00:00	5785.15
2014-10-13 22:30:00	5630.62
2014-10-13 23:00:00	5564.51
2014-10-13 23:30:00	5467.07
2014-10-14	5257.31
2014-10-14 00:30:00	5102.82
2014-10-14 01:00:00	4967.92
2014-10-14 01:30:00	4837.9
2014-10-14 02:00:00	4668.21
2014-10-14 02:30:00	4608.22
2014-10-14 03:00:00	4592.46
2014-10-14 03:30:00	4611.63
2014-10-14 04:00:00	4596.42
2014-10-14 04:30:00	4637.98
2014-10-14 05:00:00	4733
2014-10-14 05:30:00	4893.83
2014-10-14 06:00:00	5026.65
2014-10-14 06:30:00	5355.08
2014-10-14 07:00:00	5648.05
2014-10-14 07:30:00	5852.02
2014-10-14 08:00:00	5905.39
2014-10-14 08:30:00	5945.43
2014-10-14 09:00:00	5961.95
2014-10-14 09:30:00	5939.75
2014-10-14 10:00:00	5866.82
2014-10-14 10:30:00	5889.34
2014-10-14 11:00:00	5820.01
2014-10-14 11:30:00	5803.49
2014-10-14 12:00:00	5768.17
2014-10-14 12:30:00	5805.01
2014-10-14 13:00:00	5832.13
2014-10-14 13:30:00	5816.84
2014-10-14 14:00:00	5890.29
2014-10-14 14:30:00	5946.96
2014-10-14 15:00:00	5976.24
2014-10-14 15:30:00	6046.57
2014-10-14 16:00:00	6134.43
2014-10-14 16:30:00	6243.32
2014-10-14 17:00:00	6388.82
2014-10-14 17:30:00	6422.74
2014-10-14 18:00:00	6413.46
2014-10-14 18:30:00	6523.03
2014-10-14 19:00:00	6691.6
2014-10-14 19:30:00	6552.41
2014-10-14 20:00:00	6432.64
2014-10-14 20:30:00	6330.95
2014-10-14 21:00:00	6162.21
2014-10-14 21:30:00	6012.35
2014-10-14 22:00:00	5804.94
2014-10-14 22:30:00	5628.45
2014-10-14 23:00:00	5463.47
2014-10-14 23:30:00	5354.19
2014-10-15	5151.91
2014-10-15 00:30:00	5026.21
2014-10-15 01:00:00	4860.89
2014-10-15 01:30:00	4700.14
2014-10-15 02:00:00	4641.3
2014-10-15 02:30:00	4523.88
2014-10-15 03:00:00	4519.53
2014-10-15 03:30:00	4491.25
2014-10-15 04:00:00	4472.45
2014-10-15 04:30:00	4507.78
2014-10-15 05:00:00	4625.29
2014-10-15 05:30:00	4788.61
2014-10-15 06:00:00	4939.41
2014-10-15 06:30:00	5210.36
2014-10-15 07:00:00	5496.93
2014-10-15 07:30:00	5708.35
2014-10-15 08:00:00	5621.22
2014-10-15 08:30:00	5454.38
2014-10-15 09:00:00	5372.14
2014-10-15 09:30:00	5291.02
2014-10-15 10:00:00	5231.03
2014-10-15 10:30:00	5236.51
2014-10-15 11:00:00	5221.71
2014-10-15 11:30:00	5177.01
2014-10-15 12:00:00	5286.63
2014-10-15 12:30:00	5339.93
2014-10-15 13:00:00	5353.66
2014-10-15 13:30:00	5428.03
2014-10-15 14:00:00	5445.58
2014-10-15 14:30:00	5592.21
2014-10-15 15:00:00	5665.86
2014-10-15 15:30:00	5731.86
2014-10-15 16:00:00	5866.65
2014-10-15 16:30:00	6024.14
2014-10-15 17:00:00	6039.91
2014-10-15 17:30:00	6254.61
2014-10-15 18:00:00	6289.23
2014-10-15 18:30:00	6335.15
2014-10-15 19:00:00	6384.38
2014-10-15 19:30:00	6427.85
2014-10-15 20:00:00	6332.28
2014-10-15 20:30:00	6225.4
2014-10-15 21:00:00	6078.79
2014-10-15 21:30:00	5860.43
2014-10-15 22:00:00	5733.21
2014-10-15 22:30:00	5613.62
2014-10-15 23:00:00	5446.54
2014-10-15 23:30:00	5295.72
2014-10-16	5117.19
2014-10-16 00:30:00	4967.5
2014-10-16 01:00:00	4815.31
2014-10-16 01:30:00	4656.69
2014-10-16 02:00:00	4571.04
2014-10-16 02:30:00	4489.67
2014-10-16 03:00:00	4471.49
2014-10-16 03:30:00	4466.99
2014-10-16 04:00:00	4487.64
2014-10-16 04:30:00	4562.24
2014-10-16 05:00:00	4657.57
2014-10-16 05:30:00	4807.09
2014-10-16 06:00:00	4916.8
2014-10-16 06:30:00	5231.36
2014-10-16 07:00:00	5513.16
2014-10-16 07:30:00	5676.62
2014-10-16 08:00:00	5614.56
2014-10-16 08:30:00	5507.4
2014-10-16 09:00:00	5433.92
2014-10-16 09:30:00	5431.37
2014-10-16 10:00:00	5409.77
2014-10-16 10:30:00	5421.54
2014-10-16 11:00:00	5381.24
2014-10-16 11:30:00	5441.32
2014-10-16 12:00:00	5463.72
2014-10-16 12:30:00	5522.99
2014-10-16 13:00:00	5568.11
2014-10-16 13:30:00	5566.09
2014-10-16 14:00:00	5622.27
2014-10-16 14:30:00	5697.74
2014-10-16 15:00:00	5738.38
2014-10-16 15:30:00	5785.14
2014-10-16 16:00:00	5884.08
2014-10-16 16:30:00	6026.77
2014-10-16 17:00:00	6188.27
2014-10-16 17:30:00	6245.03
2014-10-16 18:00:00	6289.42
2014-10-16 18:30:00	6370.04
2014-10-16 19:00:00	6577.46
2014-10-16 19:30:00	6512.07
2014-10-16 20:00:00	6457.07
2014-10-16 20:30:00	6389.87
2014-10-16 21:00:00	6215.46
2014-10-16 21:30:00	6004.6
2014-10-16 22:00:00	5800.5
2014-10-16 22:30:00	5612.8
2014-10-16 23:00:00	5550.35
2014-10-16 23:30:00	5372.94
2014-10-17	5208.94
2014-10-17 00:30:00	5050.9
2014-10-17 01:00:00	4887.19
2014-10-17 01:30:00	4680.42
2014-10-17 02:00:00	4535.5
2014-10-17 02:30:00	4496.76
2014-10-17 03:00:00	4500.02
2014-10-17 03:30:00	4505.07
2014-10-17 04:00:00	4523.18
2014-10-17 04:30:00	4553.23
2014-10-17 05:00:00	4653.58
2014-10-17 05:30:00	4834.4
2014-10-17 06:00:00	5007.49
2014-10-17 06:30:00	5291.82
2014-10-17 07:00:00	5524.57
2014-10-17 07:30:00	5804.91
2014-10-17 08:00:00	5796.41
2014-10-17 08:30:00	5722.69
2014-10-17 09:00:00	5641.36
2014-10-17 09:30:00	5660.96
2014-10-17 10:00:00	5584.57
2014-10-17 10:30:00	5603.1
2014-10-17 11:00:00	5655.99
2014-10-17 11:30:00	5691.62
2014-10-17 12:00:00	5666.29
2014-10-17 12:30:00	5662.07
2014-10-17 13:00:00	5717.13
2014-10-17 13:30:00	5754.24
2014-10-17 14:00:00	5851.56
2014-10-17 14:30:00	5957.09
2014-10-17 15:00:00	5996.54
2014-10-17 15:30:00	6004.52
2014-10-17 16:00:00	6096.78
2014-10-17 16:30:00	6211.28
2014-10-17 17:00:00	6328.26
2014-10-17 17:30:00	6332.74
2014-10-17 18:00:00	6227.1
2014-10-17 18:30:00	6321.58
2014-10-17 19:00:00	6496.79
2014-10-17 19:30:00	6354.17
2014-10-17 20:00:00	6259.74
2014-10-17 20:30:00	6172.55
2014-10-17 21:00:00	5997.42
2014-10-17 21:30:00	5881.98
2014-10-17 22:00:00	5703.76
2014-10-17 22:30:00	5566.17
2014-10-17 23:00:00	5448.37
2014-10-17 23:30:00	5380.56
2014-10-18	5201.89
2014-10-18 00:30:00	5015.55
2014-10-18 01:00:00	4894.87
2014-10-18 01:30:00	4751.06
2014-10-18 02:00:00	4610.25
2014-10-18 02:30:00	4506.41
2014-10-18 03:00:00	4492.6
2014-10-18 03:30:00	4453.55
2014-10-18 04:00:00	4446.81
2014-10-18 04:30:00	4503.37
2014-10-18 05:00:00	4535.75
2014-10-18 05:30:00	4599.39
2014-10-18 06:00:00	4653.44
2014-10-18 06:30:00	4729.96
2014-10-18 07:00:00	4833.92
2014-10-18 07:30:00	4971.72
2014-10-18 08:00:00	5041.04
2014-10-18 08:30:00	5116.96
2014-10-18 09:00:00	5146.94
2014-10-18 09:30:00	5206.75
2014-10-18 10:00:00	5173.54
2014-10-18 10:30:00	5115.96
2014-10-18 11:00:00	5060.62
2014-10-18 11:30:00	5044.51
2014-10-18 12:00:00	5090.81
2014-10-18 12:30:00	5044.51
2014-10-18 13:00:00	5038.49
2014-10-18 13:30:00	5055.14
2014-10-18 14:00:00	5016.85
2014-10-18 14:30:00	5013.49
2014-10-18 15:00:00	5053.84
2014-10-18 15:30:00	5133.82
2014-10-18 16:00:00	5286.2
2014-10-18 16:30:00	5470.12
2014-10-18 17:00:00	5619.42
2014-10-18 17:30:00	5701.38
2014-10-18 18:00:00	5759.99
2014-10-18 18:30:00	5925.71
2014-10-18 19:00:00	6057.91
2014-10-18 19:30:00	5962.6
2014-10-18 20:00:00	5876.03
2014-10-18 20:30:00	5820.54
2014-10-18 21:00:00	5669.59
2014-10-18 21:30:00	5586.34
2014-10-18 22:00:00	5493.98
2014-10-18 22:30:00	5406.53
2014-10-18 23:00:00	5306.29
2014-10-18 23:30:00	5239.79
2014-10-19	5121.74
2014-10-19 00:30:00	4992.41
2014-10-19 01:00:00	4851.62
2014-10-19 01:30:00	4708.14
2014-10-19 02:00:00	4587.54
2014-10-19 02:30:00	4553.27
2014-10-19 03:00:00	4516.27
2014-10-19 03:30:00	4443.39
2014-10-19 04:00:00	4416.97
2014-10-19 04:30:00	4471.17
2014-10-19 05:00:00	4483.1
2014-10-19 05:30:00	4490.09
2014-10-19 06:00:00	4510.9
2014-10-19 06:30:00	4535.62
2014-10-19 07:00:00	4592.64
2014-10-19 07:30:00	4721.67
2014-10-19 08:00:00	4737.01
2014-10-19 08:30:00	4848.27
2014-10-19 09:00:00	4904.9
2014-10-19 09:30:00	4951.24
2014-10-19 10:00:00	4960.85
2014-10-19 10:30:00	4967.65
2014-10-19 11:00:00	4927.24
2014-10-19 11:30:00	4876.76
2014-10-19 12:00:00	4850.95
2014-10-19 12:30:00	4836.97
2014-10-19 13:00:00	4814.86
2014-10-19 13:30:00	4813.84
2014-10-19 14:00:00	4822.76
2014-10-19 14:30:00	4892.09
2014-10-19 15:00:00	4972.47
2014-10-19 15:30:00	5062.91
2014-10-19 16:00:00	5182.52
2014-10-19 16:30:00	5355.56
2014-10-19 17:00:00	5518.39
2014-10-19 17:30:00	5668.29
2014-10-19 18:00:00	5814.56
2014-10-19 18:30:00	6009.5
2014-10-19 19:00:00	6177.26
2014-10-19 19:30:00	6025.87
2014-10-19 20:00:00	5937.24
2014-10-19 20:30:00	5793.82
2014-10-19 21:00:00	5629.9
2014-10-19 21:30:00	5562.99
2014-10-19 22:00:00	5474.94
2014-10-19 22:30:00	5335.42
2014-10-19 23:00:00	5224.54
2014-10-19 23:30:00	5084.11
2014-10-20	5003.07
2014-10-20 00:30:00	4862.95
2014-10-20 01:00:00	4739.6
2014-10-20 01:30:00	4596.47
2014-10-20 02:00:00	4488.85
2014-10-20 02:30:00	4407.37
2014-10-20 03:00:00	4372.5
2014-10-20 03:30:00	4362.62
2014-10-20 04:00:00	4397.31
2014-10-20 04:30:00	4471.86
2014-10-20 05:00:00	4556.44
2014-10-20 05:30:00	4708.6
2014-10-20 06:00:00	4832.08
2014-10-20 06:30:00	5058.73
2014-10-20 07:00:00	5289.61
2014-10-20 07:30:00	5490.01
2014-10-20 08:00:00	5547.36
2014-10-20 08:30:00	5541.54
2014-10-20 09:00:00	5534.47
2014-10-20 09:30:00	5508.43
2014-10-20 10:00:00	5468.65
2014-10-20 10:30:00	5496.23
2014-10-20 11:00:00	5488.16
2014-10-20 11:30:00	5484.58
2014-10-20 12:00:00	5538.58
2014-10-20 12:30:00	5534.15
2014-10-20 13:00:00	5573.91
2014-10-20 13:30:00	5596.77
2014-10-20 14:00:00	5657.25
2014-10-20 14:30:00	5720.67
2014-10-20 15:00:00	5806.92
2014-10-20 15:30:00	5890.78
2014-10-20 16:00:00	6014.35
2014-10-20 16:30:00	6084.73
2014-10-20 17:00:00	6236.36
2014-10-20 17:30:00	6244.51
2014-10-20 18:00:00	6270.82
2014-10-20 18:30:00	6344.16
2014-10-20 19:00:00	6450.52
2014-10-20 19:30:00	6328.83
2014-10-20 20:00:00	6250.57
2014-10-20 20:30:00	6162.73
2014-10-20 21:00:00	5982.4
2014-10-20 21:30:00	5852.2
2014-10-20 22:00:00	5695.91
2014-10-20 22:30:00	5558.54
2014-10-20 23:00:00	5433.02
2014-10-20 23:30:00	5300.8
2014-10-21	5088.7
2014-10-21 00:30:00	4931.66
2014-10-21 01:00:00	4801.23
2014-10-21 01:30:00	4618.5
2014-10-21 02:00:00	4509.84
2014-10-21 02:30:00	4424.56
2014-10-21 03:00:00	4427.95
2014-10-21 03:30:00	4416.53
2014-10-21 04:00:00	4388.83
2014-10-21 04:30:00	4504.21
2014-10-21 05:00:00	4585.21
2014-10-21 05:30:00	4760.68
2014-10-21 06:00:00	4886.16
2014-10-21 06:30:00	5229.94
2014-10-21 07:00:00	5566.84
2014-10-21 07:30:00	5866.76
2014-10-21 08:00:00	5909.26
2014-10-21 08:30:00	5877.53
2014-10-21 09:00:00	5819.77
2014-10-21 09:30:00	5766.8
2014-10-21 10:00:00	5719.68
2014-10-21 10:30:00	5711.38
2014-10-21 11:00:00	5767.83
2014-10-21 11:30:00	5824.36
2014-10-21 12:00:00	5792.9
2014-10-21 12:30:00	5780.18
2014-10-21 13:00:00	5827.28
2014-10-21 13:30:00	5838.31
2014-10-21 14:00:00	5881.31
2014-10-21 14:30:00	5910.45
2014-10-21 15:00:00	5909.49
2014-10-21 15:30:00	5927.57
2014-10-21 16:00:00	6013.94
2014-10-21 16:30:00	6062.95
2014-10-21 17:00:00	6156.53
2014-10-21 17:30:00	6235.44
2014-10-21 18:00:00	6254.68
2014-10-21 18:30:00	6328.32
2014-10-21 19:00:00	6500.33
2014-10-21 19:30:00	6351.61
2014-10-21 20:00:00	6259.61
2014-10-21 20:30:00	6160.94
2014-10-21 21:00:00	6012.26
2014-10-21 21:30:00	5845.55
2014-10-21 22:00:00	5693.6
2014-10-21 22:30:00	5540.44
2014-10-21 23:00:00	5429.25
2014-10-21 23:30:00	5306.89
2014-10-22	5119.38
2014-10-22 00:30:00	4952.07
2014-10-22 01:00:00	4803.82
2014-10-22 01:30:00	4658.09
2014-10-22 02:00:00	4519.91
2014-10-22 02:30:00	4432.47
2014-10-22 03:00:00	4439.19
2014-10-22 03:30:00	4424.47
2014-10-22 04:00:00	4435.61
2014-10-22 04:30:00	4502.84
2014-10-22 05:00:00	4608.79
2014-10-22 05:30:00	4715.98
2014-10-22 06:00:00	4901.34
2014-10-22 06:30:00	5225.7
2014-10-22 07:00:00	5498.7
2014-10-22 07:30:00	5708.94
2014-10-22 08:00:00	5728.9
2014-10-22 08:30:00	5682.82
2014-10-22 09:00:00	5633.03
2014-10-22 09:30:00	5677.91
2014-10-22 10:00:00	5652.02
2014-10-22 10:30:00	5633.01
2014-10-22 11:00:00	5664.75
2014-10-22 11:30:00	5639.57
2014-10-22 12:00:00	5653.02
2014-10-22 12:30:00	5625.73
2014-10-22 13:00:00	5598.8
2014-10-22 13:30:00	5587.19
2014-10-22 14:00:00	5647.9
2014-10-22 14:30:00	5700.52
2014-10-22 15:00:00	5739.12
2014-10-22 15:30:00	5767.41
2014-10-22 16:00:00	5875.29
2014-10-22 16:30:00	6023.17
2014-10-22 17:00:00	6139.42
2014-10-22 17:30:00	6192.07
2014-10-22 18:00:00	6224.18
2014-10-22 18:30:00	6296.26
2014-10-22 19:00:00	6434.5
2014-10-22 19:30:00	6357.7
2014-10-22 20:00:00	6298.66
2014-10-22 20:30:00	6248.7
2014-10-22 21:00:00	6039.52
2014-10-22 21:30:00	5883.91
2014-10-22 22:00:00	5717.29
2014-10-22 22:30:00	5538.78
2014-10-22 23:00:00	5369.15
2014-10-22 23:30:00	5290.97
2014-10-23	5156.78
2014-10-23 00:30:00	5006.41
2014-10-23 01:00:00	4870.63
2014-10-23 01:30:00	4709.87
2014-10-23 02:00:00	4614.63
2014-10-23 02:30:00	4568.84
2014-10-23 03:00:00	4492.86
2014-10-23 03:30:00	4517.22
2014-10-23 04:00:00	4516.51
2014-10-23 04:30:00	4579.75
2014-10-23 05:00:00	4725.97
2014-10-23 05:30:00	4836.34
2014-10-23 06:00:00	4951.22
2014-10-23 06:30:00	5222.01
2014-10-23 07:00:00	5477.59
2014-10-23 07:30:00	5698.15
2014-10-23 08:00:00	5693.45
2014-10-23 08:30:00	5610.83
2014-10-23 09:00:00	5548.02
2014-10-23 09:30:00	5539.33
2014-10-23 10:00:00	5519.84
2014-10-23 10:30:00	5455.7
2014-10-23 11:00:00	5488
2014-10-23 11:30:00	5463.13
2014-10-23 12:00:00	5508.13
2014-10-23 12:30:00	5535.73
2014-10-23 13:00:00	5565.7
2014-10-23 13:30:00	5595.73
2014-10-23 14:00:00	5682.91
2014-10-23 14:30:00	5752.5
2014-10-23 15:00:00	5847.52
2014-10-23 15:30:00	5923.66
2014-10-23 16:00:00	6040.65
2014-10-23 16:30:00	6171.63
2014-10-23 17:00:00	6324.71
2014-10-23 17:30:00	6312.74
2014-10-23 18:00:00	6424.74
2014-10-23 18:30:00	6528.35
2014-10-23 19:00:00	6689.92
2014-10-23 19:30:00	6593.2
2014-10-23 20:00:00	6453.2
2014-10-23 20:30:00	6379.73
2014-10-23 21:00:00	6201.22
2014-10-23 21:30:00	5999.81
2014-10-23 22:00:00	5777.9
2014-10-23 22:30:00	5594.79
2014-10-23 23:00:00	5486.32
2014-10-23 23:30:00	5368.53
2014-10-24	5216.05
2014-10-24 00:30:00	5076.76
2014-10-24 01:00:00	4928.16
2014-10-24 01:30:00	4740.38
2014-10-24 02:00:00	4601.49
2014-10-24 02:30:00	4516.97
2014-10-24 03:00:00	4502.94
2014-10-24 03:30:00	4491.7
2014-10-24 04:00:00	4508.08
2014-10-24 04:30:00	4562.5
2014-10-24 05:00:00	4652.39
2014-10-24 05:30:00	4788.72
2014-10-24 06:00:00	4986.67
2014-10-24 06:30:00	5268.22
2014-10-24 07:00:00	5490.97
2014-10-24 07:30:00	5742.48
2014-10-24 08:00:00	5773.25
2014-10-24 08:30:00	5741.41
2014-10-24 09:00:00	5720.52
2014-10-24 09:30:00	5722.57
2014-10-24 10:00:00	5694.24
2014-10-24 10:30:00	5651.41
2014-10-24 11:00:00	5680.35
2014-10-24 11:30:00	5700.33
2014-10-24 12:00:00	5717.47
2014-10-24 12:30:00	5740.62
2014-10-24 13:00:00	5774.48
2014-10-24 13:30:00	5778.24
2014-10-24 14:00:00	5824.28
2014-10-24 14:30:00	5887.96
2014-10-24 15:00:00	5963.39
2014-10-24 15:30:00	5988.26
2014-10-24 16:00:00	6102.74
2014-10-24 16:30:00	6271.7
2014-10-24 17:00:00	6348.05
2014-10-24 17:30:00	6322.89
2014-10-24 18:00:00	6193.85
2014-10-24 18:30:00	6298.24
2014-10-24 19:00:00	6390.27
2014-10-24 19:30:00	6330.39
2014-10-24 20:00:00	6194.33
2014-10-24 20:30:00	6149.82
2014-10-24 21:00:00	5990.44
2014-10-24 21:30:00	5842.28
2014-10-24 22:00:00	5693.83
2014-10-24 22:30:00	5577.71
2014-10-24 23:00:00	5467.01
2014-10-24 23:30:00	5385.37
2014-10-25	5210.57
2014-10-25 00:30:00	5056.77
2014-10-25 01:00:00	4869.23
2014-10-25 01:30:00	4690.03
2014-10-25 02:00:00	4616.75
2014-10-25 02:30:00	4534.61
2014-10-25 03:00:00	4512.47
2014-10-25 03:30:00	4480.86
2014-10-25 04:00:00	4461.18
2014-10-25 04:30:00	4473.33
2014-10-25 05:00:00	4493.14
2014-10-25 05:30:00	4501.06
2014-10-25 06:00:00	4556.38
2014-10-25 06:30:00	4619.89
2014-10-25 07:00:00	4745.55
2014-10-25 07:30:00	4929.96
2014-10-25 08:00:00	5005.15
2014-10-25 08:30:00	5111.59
2014-10-25 09:00:00	5139.07
2014-10-25 09:30:00	5136.18
2014-10-25 10:00:00	5118.12
2014-10-25 10:30:00	5102.27
2014-10-25 11:00:00	5081.23
2014-10-25 11:30:00	5033.53
2014-10-25 12:00:00	5056.92
2014-10-25 12:30:00	5113.71
2014-10-25 13:00:00	5133.15
2014-10-25 13:30:00	5170.83
2014-10-25 14:00:00	5221.79
2014-10-25 14:30:00	5306.12
2014-10-25 15:00:00	5414.26
2014-10-25 15:30:00	5537.19
2014-10-25 16:00:00	5709.83
2014-10-25 16:30:00	5786.87
2014-10-25 17:00:00	5960.03
2014-10-25 17:30:00	6020.06
2014-10-25 18:00:00	6004.24
2014-10-25 18:30:00	6121.88
2014-10-25 19:00:00	6258.51
2014-10-25 19:30:00	6166.3
2014-10-25 20:00:00	6117.5
2014-10-25 20:30:00	6034.84
2014-10-25 21:00:00	5860.79
2014-10-25 21:30:00	5741.63
2014-10-25 22:00:00	5638.68
2014-10-25 22:30:00	5512.92
2014-10-25 23:00:00	5426.7
2014-10-25 23:30:00	5400.13
2014-10-26	5200.44
2014-10-26 00:30:00	5063.48
2014-10-26 01:00:00	4918.13
2014-10-26 01:30:00	4742.25
2014-10-26 02:00:00	4623.27
2014-10-26 02:30:00	4548.07
2014-10-26 03:00:00	4506.82
2014-10-26 03:30:00	4473.55
2014-10-26 04:00:00	4488.62
2014-10-26 04:30:00	4474.81
2014-10-26 05:00:00	4487.2
2014-10-26 05:30:00	4489.94
2014-10-26 06:00:00	4496.42
2014-10-26 06:30:00	4476.11
2014-10-26 07:00:00	4560.01
2014-10-26 07:30:00	4714.29
2014-10-26 08:00:00	4807.27
2014-10-26 08:30:00	4880.94
2014-10-26 09:00:00	4990.4
2014-10-26 09:30:00	5031.81
2014-10-26 10:00:00	5072.63
2014-10-26 10:30:00	5107.23
2014-10-26 11:00:00	5115.22
2014-10-26 11:30:00	5168.55
2014-10-26 12:00:00	5228.99
2014-10-26 12:30:00	5253.85
2014-10-26 13:00:00	5351.01
2014-10-26 13:30:00	5391.31
2014-10-26 14:00:00	5448.4
2014-10-26 14:30:00	5559.3
2014-10-26 15:00:00	5733.17
2014-10-26 15:30:00	5797.09
2014-10-26 16:00:00	5957.49
2014-10-26 16:30:00	6062.13
2014-10-26 17:00:00	6191.66
2014-10-26 17:30:00	6345.05
2014-10-26 18:00:00	6377.77
2014-10-26 18:30:00	6493.96
2014-10-26 19:00:00	6596.79
2014-10-26 19:30:00	6479.21
2014-10-26 20:00:00	6393.61
2014-10-26 20:30:00	6325.54
2014-10-26 21:00:00	6152.32
2014-10-26 21:30:00	5983.82
2014-10-26 22:00:00	5794.67
2014-10-26 22:30:00	5613.28
2014-10-26 23:00:00	5497.82
2014-10-26 23:30:00	5398
2014-10-27	5205.62
2014-10-27 00:30:00	5063.89
2014-10-27 01:00:00	4915.38
2014-10-27 01:30:00	4732.96
2014-10-27 02:00:00	4607.51
2014-10-27 02:30:00	4568.88
2014-10-27 03:00:00	4556.83
2014-10-27 03:30:00	4511.93
2014-10-27 04:00:00	4522.12
2014-10-27 04:30:00	4614.32
2014-10-27 05:00:00	4716.31
2014-10-27 05:30:00	4848.08
2014-10-27 06:00:00	5013.33
2014-10-27 06:30:00	5365.98
2014-10-27 07:00:00	5664.26
2014-10-27 07:30:00	5961.92
2014-10-27 08:00:00	6054.69
2014-10-27 08:30:00	6098.94
2014-10-27 09:00:00	6146.92
2014-10-27 09:30:00	6201.11
2014-10-27 10:00:00	6237.47
2014-10-27 10:30:00	6292.44
2014-10-27 11:00:00	6375.94
2014-10-27 11:30:00	6453.41
2014-10-27 12:00:00	6536.24
2014-10-27 12:30:00	6658.86
2014-10-27 13:00:00	6788.62
2014-10-27 13:30:00	6860.4
2014-10-27 14:00:00	7023.98
2014-10-27 14:30:00	7134.42
2014-10-27 15:00:00	7185.17
2014-10-27 15:30:00	7148.89
2014-10-27 16:00:00	7346.22
2014-10-27 16:30:00	7376.08
2014-10-27 17:00:00	7346.17
2014-10-27 17:30:00	7225.56
2014-10-27 18:00:00	7222.42
2014-10-27 18:30:00	7262.65
2014-10-27 19:00:00	7342.09
2014-10-27 19:30:00	7186.69
2014-10-27 20:00:00	7050.09
2014-10-27 20:30:00	6934.1
2014-10-27 21:00:00	6728.84
2014-10-27 21:30:00	6496.76
2014-10-27 22:00:00	6234.43
2014-10-27 22:30:00	6014.64
2014-10-27 23:00:00	5880.59
2014-10-27 23:30:00	5712.11
2014-10-28	5471.39
2014-10-28 00:30:00	5285.35
2014-10-28 01:00:00	5198.94
2014-10-28 01:30:00	5008.43
2014-10-28 02:00:00	4864.11
2014-10-28 02:30:00	4829.04
2014-10-28 03:00:00	4808.16
2014-10-28 03:30:00	4806.47
2014-10-28 04:00:00	4837.44
2014-10-28 04:30:00	4875.94
2014-10-28 05:00:00	4919.62
2014-10-28 05:30:00	5067.96
2014-10-28 06:00:00	5255.23
2014-10-28 06:30:00	5563.53
2014-10-28 07:00:00	5860.49
2014-10-28 07:30:00	6219.77
2014-10-28 08:00:00	6303.6
2014-10-28 08:30:00	6338.35
2014-10-28 09:00:00	6452.97
2014-10-28 09:30:00	6474.2
2014-10-28 10:00:00	6527.31
2014-10-28 10:30:00	6538
2014-10-28 11:00:00	6561.49
2014-10-28 11:30:00	6516.73
2014-10-28 12:00:00	6565.17
2014-10-28 12:30:00	6621.59
2014-10-28 13:00:00	6687.42
2014-10-28 13:30:00	6764.57
2014-10-28 14:00:00	6895.33
2014-10-28 14:30:00	7038.99
2014-10-28 15:00:00	7025.62
2014-10-28 15:30:00	7082.88
2014-10-28 16:00:00	7189.24
2014-10-28 16:30:00	7310.07
2014-10-28 17:00:00	7335.89
2014-10-28 17:30:00	7195.15
2014-10-28 18:00:00	7107.41
2014-10-28 18:30:00	7082.7
2014-10-28 19:00:00	7239.49
2014-10-28 19:30:00	7108.79
2014-10-28 20:00:00	6964.67
2014-10-28 20:30:00	6853.5
2014-10-28 21:00:00	6599.41
2014-10-28 21:30:00	6411.01
2014-10-28 22:00:00	6181.01
2014-10-28 22:30:00	5967.74
2014-10-28 23:00:00	5813.99
2014-10-28 23:30:00	5667.15
2014-10-29	5438.96
2014-10-29 00:30:00	5267.8
2014-10-29 01:00:00	5079.66
2014-10-29 01:30:00	4927.34
2014-10-29 02:00:00	4886.3
2014-10-29 02:30:00	4791.2
2014-10-29 03:00:00	4777.79
2014-10-29 03:30:00	4781.56
2014-10-29 04:00:00	4748.46
2014-10-29 04:30:00	4835.19
2014-10-29 05:00:00	4910.57
2014-10-29 05:30:00	5048.66
2014-10-29 06:00:00	5227.99
2014-10-29 06:30:00	5548.64
2014-10-29 07:00:00	5774.69
2014-10-29 07:30:00	6113.79
2014-10-29 08:00:00	6127.51
2014-10-29 08:30:00	6135.28
2014-10-29 09:00:00	6168.46
2014-10-29 09:30:00	6240.09
2014-10-29 10:00:00	6197.75
2014-10-29 10:30:00	6209.85
2014-10-29 11:00:00	6262.41
2014-10-29 11:30:00	6312.16
2014-10-29 12:00:00	6397.59
2014-10-29 12:30:00	6450.67
2014-10-29 13:00:00	6523.69
2014-10-29 13:30:00	6599.83
2014-10-29 14:00:00	6635.45
2014-10-29 14:30:00	6691.64
2014-10-29 15:00:00	6745.31
2014-10-29 15:30:00	6774.72
2014-10-29 16:00:00	6884.36
2014-10-29 16:30:00	6991.93
2014-10-29 17:00:00	7034.09
2014-10-29 17:30:00	6967.91
2014-10-29 18:00:00	6887.7
2014-10-29 18:30:00	6878.96
2014-10-29 19:00:00	7060.61
2014-10-29 19:30:00	6921.77
2014-10-29 20:00:00	6824.54
2014-10-29 20:30:00	6663.13
2014-10-29 21:00:00	6503.68
2014-10-29 21:30:00	6308.7
2014-10-29 22:00:00	6152.52
2014-10-29 22:30:00	5936.46
2014-10-29 23:00:00	5769.9
2014-10-29 23:30:00	5641.24
2014-10-30	5456.95
2014-10-30 00:30:00	5306.14
2014-10-30 01:00:00	5164.09
2014-10-30 01:30:00	4974.86
2014-10-30 02:00:00	4910.73
2014-10-30 02:30:00	4797.58
2014-10-30 03:00:00	4759.19
2014-10-30 03:30:00	4746.23
2014-10-30 04:00:00	4775.35
2014-10-30 04:30:00	4835.6
2014-10-30 05:00:00	4888.74
2014-10-30 05:30:00	4998.92
2014-10-30 06:00:00	5225.49
2014-10-30 06:30:00	5559.04
2014-10-30 07:00:00	5811.64
2014-10-30 07:30:00	6084.4
2014-10-30 08:00:00	6149.5
2014-10-30 08:30:00	6163.29
2014-10-30 09:00:00	6124.31
2014-10-30 09:30:00	6121.21
2014-10-30 10:00:00	6075.22
2014-10-30 10:30:00	6101.19
2014-10-30 11:00:00	6179.34
2014-10-30 11:30:00	6185.39
2014-10-30 12:00:00	6269.66
2014-10-30 12:30:00	6330.73
2014-10-30 13:00:00	6404.95
2014-10-30 13:30:00	6493.86
2014-10-30 14:00:00	6572.4
2014-10-30 14:30:00	6617.49
2014-10-30 15:00:00	6618.83
2014-10-30 15:30:00	6714.1
2014-10-30 16:00:00	6850.11
2014-10-30 16:30:00	6973.25
2014-10-30 17:00:00	7025.38
2014-10-30 17:30:00	6923.04
2014-10-30 18:00:00	6915.48
2014-10-30 18:30:00	6979.64
2014-10-30 19:00:00	7136.44
2014-10-30 19:30:00	7040.77
2014-10-30 20:00:00	6950.21
2014-10-30 20:30:00	6853.99
2014-10-30 21:00:00	6638.65
2014-10-30 21:30:00	6423.87
2014-10-30 22:00:00	6207.85
2014-10-30 22:30:00	6003.65
2014-10-30 23:00:00	5851.81
2014-10-30 23:30:00	5748.39
2014-10-31	5500.55
2014-10-31 00:30:00	5336.52
2014-10-31 01:00:00	5186.42
2014-10-31 01:30:00	5029.62
2014-10-31 02:00:00	4889.48
2014-10-31 02:30:00	4843.91
2014-10-31 03:00:00	4801.81
2014-10-31 03:30:00	4807.74
2014-10-31 04:00:00	4801.69
2014-10-31 04:30:00	4877.52
2014-10-31 05:00:00	4942.82
2014-10-31 05:30:00	5138.1
2014-10-31 06:00:00	5326.63
2014-10-31 06:30:00	5697.46
2014-10-31 07:00:00	5992.57
2014-10-31 07:30:00	6242.39
2014-10-31 08:00:00	6367.2
2014-10-31 08:30:00	6420.24
2014-10-31 09:00:00	6431.15
2014-10-31 09:30:00	6413.68
2014-10-31 10:00:00	6381.59
2014-10-31 10:30:00	6385.54
2014-10-31 11:00:00	6436.29
2014-10-31 11:30:00	6452.48
2014-10-31 12:00:00	6529.08
2014-10-31 12:30:00	6573.59
2014-10-31 13:00:00	6605.93
2014-10-31 13:30:00	6668.26
2014-10-31 14:00:00	6738.36
2014-10-31 14:30:00	6813.88
2014-10-31 15:00:00	6852.39
2014-10-31 15:30:00	6874.25
2014-10-31 16:00:00	6968.89
2014-10-31 16:30:00	7034.32
2014-10-31 17:00:00	7040.63
2014-10-31 17:30:00	6970.79
2014-10-31 18:00:00	6841.49
2014-10-31 18:30:00	6795.19
2014-10-31 19:00:00	6894.88
2014-10-31 19:30:00	6798.22
2014-10-31 20:00:00	6724.79
2014-10-31 20:30:00	6621.8
2014-10-31 21:00:00	6423.84
2014-10-31 21:30:00	6276.89
2014-10-31 22:00:00	6096.84
2014-10-31 22:30:00	5953.22
2014-10-31 23:00:00	5809.08
2014-10-31 23:30:00	5683
2014-11-01	5473.76

## Sheet: SA-Jan
SETTLEMENTDATE	TOTALDEMAND
2014-01-01 00:30:00	1528.27
2014-01-01 01:00:00	1433.97
2014-01-01 01:30:00	1351.01
2014-01-01 02:00:00	1296.55
2014-01-01 02:30:00	1248.8
2014-01-01 03:00:00	1231.4
2014-01-01 03:30:00	1206.41
2014-01-01 04:00:00	1201.73
2014-01-01 04:30:00	1223.61
2014-01-01 05:00:00	1210.71
2014-01-01 05:30:00	1261.83
2014-01-01 06:00:00	1267.69
2014-01-01 06:30:00	1294.56
2014-01-01 07:00:00	1264.91
2014-01-01 07:30:00	1305.32
2014-01-01 08:00:00	1350.16
2014-01-01 08:30:00	1409.67
2014-01-01 09:00:00	1444.9
2014-01-01 09:30:00	1501.46
2014-01-01 10:00:00	1555.45
2014-01-01 10:30:00	1567.1
2014-01-01 11:00:00	1610.87
2014-01-01 11:30:00	1595.76
2014-01-01 12:00:00	1647.22
2014-01-01 12:30:00	1628.54
2014-01-01 13:00:00	1593.68
2014-01-01 13:30:00	1642.19
2014-01-01 14:00:00	1641.32
2014-01-01 14:30:00	1538.66
2014-01-01 15:00:00	1601.25
2014-01-01 15:30:00	1632.57
2014-01-01 16:00:00	1649.45
2014-01-01 16:30:00	1695.75
2014-01-01 17:00:00	1718.34
2014-01-01 17:30:00	1697.99
2014-01-01 18:00:00	1690.32
2014-01-01 18:30:00	1649.17
2014-01-01 19:00:00	1623.1
2014-01-01 19:30:00	1599.18
2014-01-01 20:00:00	1583
2014-01-01 20:30:00	1587.76
2014-01-01 21:00:00	1607.07
2014-01-01 21:30:00	1543.72
2014-01-01 22:00:00	1467.23
2014-01-01 22:30:00	1375
2014-01-01 23:00:00	1363.9
2014-01-01 23:30:00	1356.51
2014-01-02	1552.4
2014-01-02 00:30:00	1412.57
2014-01-02 01:00:00	1317.55
2014-01-02 01:30:00	1232.04
2014-01-02 02:00:00	1208.14
2014-01-02 02:30:00	1161.56
2014-01-02 03:00:00	1131
2014-01-02 03:30:00	1113.16
2014-01-02 04:00:00	1079.11
2014-01-02 04:30:00	1109.32
2014-01-02 05:00:00	1114.6
2014-01-02 05:30:00	1201.04
2014-01-02 06:00:00	1262.73
2014-01-02 06:30:00	1268.72
2014-01-02 07:00:00	1301.04
2014-01-02 07:30:00	1318.14
2014-01-02 08:00:00	1344.35
2014-01-02 08:30:00	1348.65
2014-01-02 09:00:00	1399.66
2014-01-02 09:30:00	1388.75
2014-01-02 10:00:00	1390.26
2014-01-02 10:30:00	1371.17
2014-01-02 11:00:00	1355.71
2014-01-02 11:30:00	1404.6
2014-01-02 12:00:00	1336.28
2014-01-02 12:30:00	1286.49
2014-01-02 13:00:00	1309.39
2014-01-02 13:30:00	1363.03
2014-01-02 14:00:00	1356.72
2014-01-02 14:30:00	1297.57
2014-01-02 15:00:00	1369.28
2014-01-02 15:30:00	1411.07
2014-01-02 16:00:00	1434.73
2014-01-02 16:30:00	1459.17
2014-01-02 17:00:00	1488.89
2014-01-02 17:30:00	1464.93
2014-01-02 18:00:00	1474.35
2014-01-02 18:30:00	1456.86
2014-01-02 19:00:00	1421.92
2014-01-02 19:30:00	1414.82
2014-01-02 20:00:00	1401.25
2014-01-02 20:30:00	1389.21
2014-01-02 21:00:00	1397.43
2014-01-02 21:30:00	1378.08
2014-01-02 22:00:00	1300.41
2014-01-02 22:30:00	1261.06
2014-01-02 23:00:00	1252.74
2014-01-02 23:30:00	1272.25
2014-01-03	1533.64
2014-01-03 00:30:00	1429.98
2014-01-03 01:00:00	1358.58
2014-01-03 01:30:00	1255.6
2014-01-03 02:00:00	1179.22
2014-01-03 02:30:00	1159.45
2014-01-03 03:00:00	1128.73
2014-01-03 03:30:00	1113.64
2014-01-03 04:00:00	1107.7
2014-01-03 04:30:00	1109.92
2014-01-03 05:00:00	1087.3
2014-01-03 05:30:00	1115.17
2014-01-03 06:00:00	1134.35
2014-01-03 06:30:00	1161.28
2014-01-03 07:00:00	1224.37
2014-01-03 07:30:00	1248.39
2014-01-03 08:00:00	1212.88
2014-01-03 08:30:00	1229.29
2014-01-03 09:00:00	1196.41
2014-01-03 09:30:00	1130.15
2014-01-03 10:00:00	1111.83
2014-01-03 10:30:00	1100.28
2014-01-03 11:00:00	1056.65
2014-01-03 11:30:00	1022.27
2014-01-03 12:00:00	971.89
2014-01-03 12:30:00	974.25
2014-01-03 13:00:00	961.39
2014-01-03 13:30:00	969.39
2014-01-03 14:00:00	947.97
2014-01-03 14:30:00	955.26
2014-01-03 15:00:00	956.91
2014-01-03 15:30:00	976.82
2014-01-03 16:00:00	1028.25
2014-01-03 16:30:00	1060.3
2014-01-03 17:00:00	1047.47
2014-01-03 17:30:00	1077.95
2014-01-03 18:00:00	1111.2
2014-01-03 18:30:00	1136.53
2014-01-03 19:00:00	1137.49
2014-01-03 19:30:00	1150.89
2014-01-03 20:00:00	1163.37
2014-01-03 20:30:00	1192.36
2014-01-03 21:00:00	1196.32
2014-01-03 21:30:00	1181.14
2014-01-03 22:00:00	1186.45
2014-01-03 22:30:00	1146.84
2014-01-03 23:00:00	1133.39
2014-01-03 23:30:00	1144.28
2014-01-04	1378.67
2014-01-04 00:30:00	1251.09
2014-01-04 01:00:00	1170.92
2014-01-04 01:30:00	1098.34
2014-01-04 02:00:00	1013.26
2014-01-04 02:30:00	933.72
2014-01-04 03:00:00	948.32
2014-01-04 03:30:00	922.58
2014-01-04 04:00:00	900.65
2014-01-04 04:30:00	900.57
2014-01-04 05:00:00	906.5
2014-01-04 05:30:00	916.24
2014-01-04 06:00:00	944.43
2014-01-04 06:30:00	960.73
2014-01-04 07:00:00	982.78
2014-01-04 07:30:00	1004.49
2014-01-04 08:00:00	1004.94
2014-01-04 08:30:00	1028.45
2014-01-04 09:00:00	1025.41
2014-01-04 09:30:00	1022.99
2014-01-04 10:00:00	995.91
2014-01-04 10:30:00	964.06
2014-01-04 11:00:00	944.64
2014-01-04 11:30:00	913.11
2014-01-04 12:00:00	905.1
2014-01-04 12:30:00	892.05
2014-01-04 13:00:00	876.79
2014-01-04 13:30:00	876.81
2014-01-04 14:00:00	870.53
2014-01-04 14:30:00	865.74
2014-01-04 15:00:00	863.81
2014-01-04 15:30:00	906.19
2014-01-04 16:00:00	995.81
2014-01-04 16:30:00	1014.15
2014-01-04 17:00:00	1049.29
2014-01-04 17:30:00	1091.19
2014-01-04 18:00:00	1133.94
2014-01-04 18:30:00	1204.31
2014-01-04 19:00:00	1235.62
2014-01-04 19:30:00	1245.33
2014-01-04 20:00:00	1287.76
2014-01-04 20:30:00	1321.07
2014-01-04 21:00:00	1329.42
2014-01-04 21:30:00	1324.01
2014-01-04 22:00:00	1300.84
2014-01-04 22:30:00	1283.78
2014-01-04 23:00:00	1253.98
2014-01-04 23:30:00	1256.71
2014-01-05	1484.2
2014-01-05 00:30:00	1370.39
2014-01-05 01:00:00	1301.74
2014-01-05 01:30:00	1183.89
2014-01-05 02:00:00	1080.37
2014-01-05 02:30:00	1035.2
2014-01-05 03:00:00	986.65
2014-01-05 03:30:00	985.93
2014-01-05 04:00:00	964.51
2014-01-05 04:30:00	958.9
2014-01-05 05:00:00	956.46
2014-01-05 05:30:00	965.82
2014-01-05 06:00:00	925.29
2014-01-05 06:30:00	902.67
2014-01-05 07:00:00	935.23
2014-01-05 07:30:00	956.15
2014-01-05 08:00:00	909.94
2014-01-05 08:30:00	886.5
2014-01-05 09:00:00	844.01
2014-01-05 09:30:00	868.52
2014-01-05 10:00:00	869.97
2014-01-05 10:30:00	924.2
2014-01-05 11:00:00	907.98
2014-01-05 11:30:00	932.76
2014-01-05 12:00:00	1012.63
2014-01-05 12:30:00	1031.03
2014-01-05 13:00:00	992.14
2014-01-05 13:30:00	937.95
2014-01-05 14:00:00	914.16
2014-01-05 14:30:00	940.67
2014-01-05 15:00:00	887.42
2014-01-05 15:30:00	871.31
2014-01-05 16:00:00	899.56
2014-01-05 16:30:00	925.97
2014-01-05 17:00:00	928.69
2014-01-05 17:30:00	966.45
2014-01-05 18:00:00	1004.61
2014-01-05 18:30:00	1050.48
2014-01-05 19:00:00	1070.13
2014-01-05 19:30:00	1092.59
2014-01-05 20:00:00	1129.88
2014-01-05 20:30:00	1161.68
2014-01-05 21:00:00	1169.52
2014-01-05 21:30:00	1144.85
2014-01-05 22:00:00	1118.92
2014-01-05 22:30:00	1061.16
2014-01-05 23:00:00	1057.39
2014-01-05 23:30:00	1040.47
2014-01-06	1287.38
2014-01-06 00:30:00	1202.68
2014-01-06 01:00:00	1131.52
2014-01-06 01:30:00	1061.01
2014-01-06 02:00:00	989.36
2014-01-06 02:30:00	962.07
2014-01-06 03:00:00	921.22
2014-01-06 03:30:00	918.94
2014-01-06 04:00:00	933.23
2014-01-06 04:30:00	939.9
2014-01-06 05:00:00	969.26
2014-01-06 05:30:00	1002.54
2014-01-06 06:00:00	1071.26
2014-01-06 06:30:00	1098.38
2014-01-06 07:00:00	1156.49
2014-01-06 07:30:00	1193.78
2014-01-06 08:00:00	1164.97
2014-01-06 08:30:00	1200.86
2014-01-06 09:00:00	1192.62
2014-01-06 09:30:00	1224.74
2014-01-06 10:00:00	1209.18
2014-01-06 10:30:00	1202.03
2014-01-06 11:00:00	1208.47
2014-01-06 11:30:00	1181.45
2014-01-06 12:00:00	1160.35
2014-01-06 12:30:00	1141.16
2014-01-06 13:00:00	1097.37
2014-01-06 13:30:00	1090.45
2014-01-06 14:00:00	1075.18
2014-01-06 14:30:00	1097.26
2014-01-06 15:00:00	1079.51
2014-01-06 15:30:00	1106.29
2014-01-06 16:00:00	1132.57
2014-01-06 16:30:00	1182.77
2014-01-06 17:00:00	1195.58
2014-01-06 17:30:00	1211.18
2014-01-06 18:00:00	1218.98
2014-01-06 18:30:00	1237.2
2014-01-06 19:00:00	1252.17
2014-01-06 19:30:00	1286.47
2014-01-06 20:00:00	1283.62
2014-01-06 20:30:00	1324.39
2014-01-06 21:00:00	1343.93
2014-01-06 21:30:00	1316.66
2014-01-06 22:00:00	1276
2014-01-06 22:30:00	1242.32
2014-01-06 23:00:00	1221.57
2014-01-06 23:30:00	1222.41
2014-01-07	1473.52
2014-01-07 00:30:00	1361.22
2014-01-07 01:00:00	1305.68
2014-01-07 01:30:00	1207.66
2014-01-07 02:00:00	1164.16
2014-01-07 02:30:00	1120.66
2014-01-07 03:00:00	1102.3
2014-01-07 03:30:00	1098
2014-01-07 04:00:00	1090.94
2014-01-07 04:30:00	1104
2014-01-07 05:00:00	1103.12
2014-01-07 05:30:00	1130.24
2014-01-07 06:00:00	1176.27
2014-01-07 06:30:00	1242.9
2014-01-07 07:00:00	1311.49
2014-01-07 07:30:00	1323.07
2014-01-07 08:00:00	1275
2014-01-07 08:30:00	1264.32
2014-01-07 09:00:00	1245.17
2014-01-07 09:30:00	1209.46
2014-01-07 10:00:00	1158.3
2014-01-07 10:30:00	1148.64
2014-01-07 11:00:00	1114.81
2014-01-07 11:30:00	1081.88
2014-01-07 12:00:00	1061.1
2014-01-07 12:30:00	1053.66
2014-01-07 13:00:00	1058.44
2014-01-07 13:30:00	1058.85
2014-01-07 14:00:00	1068.21
2014-01-07 14:30:00	1084.08
2014-01-07 15:00:00	1077.33
2014-01-07 15:30:00	1089.37
2014-01-07 16:00:00	1061.08
2014-01-07 16:30:00	1136.83
2014-01-07 17:00:00	1196.51
2014-01-07 17:30:00	1220.38
2014-01-07 18:00:00	1269.72
2014-01-07 18:30:00	1284.5
2014-01-07 19:00:00	1261.15
2014-01-07 19:30:00	1276.11
2014-01-07 20:00:00	1290.56
2014-01-07 20:30:00	1327.8
2014-01-07 21:00:00	1343.76
2014-01-07 21:30:00	1345.22
2014-01-07 22:00:00	1290.38
2014-01-07 22:30:00	1242.89
2014-01-07 23:00:00	1228.74
2014-01-07 23:30:00	1235.78
2014-01-08	1469.16
2014-01-08 00:30:00	1364.29
2014-01-08 01:00:00	1301.59
2014-01-08 01:30:00	1205.32
2014-01-08 02:00:00	1150.45
2014-01-08 02:30:00	1121.61
2014-01-08 03:00:00	1102.88
2014-01-08 03:30:00	1105.95
2014-01-08 04:00:00	1090.27
2014-01-08 04:30:00	1098
2014-01-08 05:00:00	1112.63
2014-01-08 05:30:00	1126.58
2014-01-08 06:00:00	1166.7
2014-01-08 06:30:00	1220.06
2014-01-08 07:00:00	1291.47
2014-01-08 07:30:00	1304.02
2014-01-08 08:00:00	1250.52
2014-01-08 08:30:00	1251.52
2014-01-08 09:00:00	1251.41
2014-01-08 09:30:00	1244.57
2014-01-08 10:00:00	1232.18
2014-01-08 10:30:00	1255.47
2014-01-08 11:00:00	1270.34
2014-01-08 11:30:00	1270.75
2014-01-08 12:00:00	1261.33
2014-01-08 12:30:00	1268.12
2014-01-08 13:00:00	1243.19
2014-01-08 13:30:00	1226.81
2014-01-08 14:00:00	1228.61
2014-01-08 14:30:00	1221.91
2014-01-08 15:00:00	1217.03
2014-01-08 15:30:00	1233.9
2014-01-08 16:00:00	1230.45
2014-01-08 16:30:00	1263.86
2014-01-08 17:00:00	1308.45
2014-01-08 17:30:00	1333.57
2014-01-08 18:00:00	1356.66
2014-01-08 18:30:00	1384.49
2014-01-08 19:00:00	1409.41
2014-01-08 19:30:00	1401.64
2014-01-08 20:00:00	1410.72
2014-01-08 20:30:00	1455.03
2014-01-08 21:00:00	1444.19
2014-01-08 21:30:00	1409.5
2014-01-08 22:00:00	1351.42
2014-01-08 22:30:00	1327.73
2014-01-08 23:00:00	1293.84
2014-01-08 23:30:00	1261.39
2014-01-09	1487.9
2014-01-09 00:30:00	1390.54
2014-01-09 01:00:00	1323.2
2014-01-09 01:30:00	1244.46
2014-01-09 02:00:00	1198.27
2014-01-09 02:30:00	1163.11
2014-01-09 03:00:00	1139.52
2014-01-09 03:30:00	1135.95
2014-01-09 04:00:00	1140.05
2014-01-09 04:30:00	1157.45
2014-01-09 05:00:00	1202.68
2014-01-09 05:30:00	1245.95
2014-01-09 06:00:00	1289.18
2014-01-09 06:30:00	1332.29
2014-01-09 07:00:00	1404.59
2014-01-09 07:30:00	1466.87
2014-01-09 08:00:00	1465.11
2014-01-09 08:30:00	1468.44
2014-01-09 09:00:00	1472.27
2014-01-09 09:30:00	1474.36
2014-01-09 10:00:00	1456.1
2014-01-09 10:30:00	1447.46
2014-01-09 11:00:00	1449.19
2014-01-09 11:30:00	1447.41
2014-01-09 12:00:00	1446.08
2014-01-09 12:30:00	1471.67
2014-01-09 13:00:00	1498.3
2014-01-09 13:30:00	1528.11
2014-01-09 14:00:00	1505.32
2014-01-09 14:30:00	1560.81
2014-01-09 15:00:00	1615.17
2014-01-09 15:30:00	1625.89
2014-01-09 16:00:00	1677.04
2014-01-09 16:30:00	1706.53
2014-01-09 17:00:00	1740.24
2014-01-09 17:30:00	1787.66
2014-01-09 18:00:00	1802.45
2014-01-09 18:30:00	1782.57
2014-01-09 19:00:00	1799.34
2014-01-09 19:30:00	1792.84
2014-01-09 20:00:00	1764.39
2014-01-09 20:30:00	1729.89
2014-01-09 21:00:00	1696.02
2014-01-09 21:30:00	1620.69
2014-01-09 22:00:00	1555.95
2014-01-09 22:30:00	1483.21
2014-01-09 23:00:00	1446.04
2014-01-09 23:30:00	1430.96
2014-01-10	1638.02
2014-01-10 00:30:00	1503.83
2014-01-10 01:00:00	1436.13
2014-01-10 01:30:00	1366.15
2014-01-10 02:00:00	1338.54
2014-01-10 02:30:00	1307.02
2014-01-10 03:00:00	1271.39
2014-01-10 03:30:00	1257.61
2014-01-10 04:00:00	1234.66
2014-01-10 04:30:00	1230.74
2014-01-10 05:00:00	1235.89
2014-01-10 05:30:00	1256.66
2014-01-10 06:00:00	1316.86
2014-01-10 06:30:00	1352.73
2014-01-10 07:00:00	1414.79
2014-01-10 07:30:00	1488.75
2014-01-10 08:00:00	1518.56
2014-01-10 08:30:00	1561.39
2014-01-10 09:00:00	1587.07
2014-01-10 09:30:00	1612.51
2014-01-10 10:00:00	1640.85
2014-01-10 10:30:00	1684.11
2014-01-10 11:00:00	1702.98
2014-01-10 11:30:00	1739.3
2014-01-10 12:00:00	1767.78
2014-01-10 12:30:00	1779.51
2014-01-10 13:00:00	1818.76
2014-01-10 13:30:00	1842.2
2014-01-10 14:00:00	1904.96
2014-01-10 14:30:00	1906.21
2014-01-10 15:00:00	1939.49
2014-01-10 15:30:00	1957.93
2014-01-10 16:00:00	1970.97
2014-01-10 16:30:00	2020.08
2014-01-10 17:00:00	2053.33
2014-01-10 17:30:00	2036.3
2014-01-10 18:00:00	2069.5
2014-01-10 18:30:00	2050.03
2014-01-10 19:00:00	2022.43
2014-01-10 19:30:00	1974.52
2014-01-10 20:00:00	1879.89
2014-01-10 20:30:00	1817.17
2014-01-10 21:00:00	1799.63
2014-01-10 21:30:00	1714.89
2014-01-10 22:00:00	1625.62
2014-01-10 22:30:00	1543.99
2014-01-10 23:00:00	1476.9
2014-01-10 23:30:00	1458
2014-01-11	1657.95
2014-01-11 00:30:00	1525.05
2014-01-11 01:00:00	1407.02
2014-01-11 01:30:00	1302.36
2014-01-11 02:00:00	1249.49
2014-01-11 02:30:00	1253.74
2014-01-11 03:00:00	1229.06
2014-01-11 03:30:00	1204.54
2014-01-11 04:00:00	1204.31
2014-01-11 04:30:00	1199.36
2014-01-11 05:00:00	1195.52
2014-01-11 05:30:00	1222.02
2014-01-11 06:00:00	1247.39
2014-01-11 06:30:00	1232.68
2014-01-11 07:00:00	1260.03
2014-01-11 07:30:00	1282.21
2014-01-11 08:00:00	1266.58
2014-01-11 08:30:00	1270.73
2014-01-11 09:00:00	1284.43
2014-01-11 09:30:00	1286.68
2014-01-11 10:00:00	1275
2014-01-11 10:30:00	1273.92
2014-01-11 11:00:00	1293.91
2014-01-11 11:30:00	1289.02
2014-01-11 12:00:00	1308.67
2014-01-11 12:30:00	1294.84
2014-01-11 13:00:00	1322.92
2014-01-11 13:30:00	1342.79
2014-01-11 14:00:00	1376.12
2014-01-11 14:30:00	1408.91
2014-01-11 15:00:00	1419.65
2014-01-11 15:30:00	1461.59
2014-01-11 16:00:00	1477.81
2014-01-11 16:30:00	1517.3
2014-01-11 17:00:00	1545.7
2014-01-11 17:30:00	1572.91
2014-01-11 18:00:00	1571.97
2014-01-11 18:30:00	1574.29
2014-01-11 19:00:00	1529.26
2014-01-11 19:30:00	1495.62
2014-01-11 20:00:00	1452.74
2014-01-11 20:30:00	1427.75
2014-01-11 21:00:00	1438.14
2014-01-11 21:30:00	1408.07
2014-01-11 22:00:00	1375
2014-01-11 22:30:00	1331.51
2014-01-11 23:00:00	1309.92
2014-01-11 23:30:00	1299.66
2014-01-12	1521.42
2014-01-12 00:30:00	1400.7
2014-01-12 01:00:00	1314
2014-01-12 01:30:00	1204.85
2014-01-12 02:00:00	1145.24
2014-01-12 02:30:00	1127.74
2014-01-12 03:00:00	1118.02
2014-01-12 03:30:00	1113.65
2014-01-12 04:00:00	1109.22
2014-01-12 04:30:00	1097.91
2014-01-12 05:00:00	1113.55
2014-01-12 05:30:00	1127.2
2014-01-12 06:00:00	1113.07
2014-01-12 06:30:00	1135.01
2014-01-12 07:00:00	1133.42
2014-01-12 07:30:00	1138.25
2014-01-12 08:00:00	1111.56
2014-01-12 08:30:00	1110.07
2014-01-12 09:00:00	1122.32
2014-01-12 09:30:00	1124.54
2014-01-12 10:00:00	1136.22
2014-01-12 10:30:00	1162.79
2014-01-12 11:00:00	1166.98
2014-01-12 11:30:00	1215.72
2014-01-12 12:00:00	1260.11
2014-01-12 12:30:00	1298.81
2014-01-12 13:00:00	1334.23
2014-01-12 13:30:00	1368.81
2014-01-12 14:00:00	1436.08
2014-01-12 14:30:00	1517.45
2014-01-12 15:00:00	1553.54
2014-01-12 15:30:00	1625.26
2014-01-12 16:00:00	1715.27
2014-01-12 16:30:00	1796.96
2014-01-12 17:00:00	1826.35
2014-01-12 17:30:00	1891.62
2014-01-12 18:00:00	1927.29
2014-01-12 18:30:00	1956.38
2014-01-12 19:00:00	1928.93
2014-01-12 19:30:00	1881.59
2014-01-12 20:00:00	1830.81
2014-01-12 20:30:00	1773.5
2014-01-12 21:00:00	1751.34
2014-01-12 21:30:00	1654.96
2014-01-12 22:00:00	1570.54
2014-01-12 22:30:00	1502.36
2014-01-12 23:00:00	1453.09
2014-01-12 23:30:00	1465.17
2014-01-13	1672.48
2014-01-13 00:30:00	1544.38
2014-01-13 01:00:00	1459.59
2014-01-13 01:30:00	1405.75
2014-01-13 02:00:00	1338.09
2014-01-13 02:30:00	1300.72
2014-01-13 03:00:00	1288.35
2014-01-13 03:30:00	1277.74
2014-01-13 04:00:00	1293.85
2014-01-13 04:30:00	1290.91
2014-01-13 05:00:00	1314.79
2014-01-13 05:30:00	1341.59
2014-01-13 06:00:00	1407.12
2014-01-13 06:30:00	1471.48
2014-01-13 07:00:00	1612.75
2014-01-13 07:30:00	1686.34
2014-01-13 08:00:00	1732.94
2014-01-13 08:30:00	1840.43
2014-01-13 09:00:00	1901.14
2014-01-13 09:30:00	1935.54
2014-01-13 10:00:00	2001.2
2014-01-13 10:30:00	2062.27
2014-01-13 11:00:00	2120.66
2014-01-13 11:30:00	2208.68
2014-01-13 12:00:00	2278.66
2014-01-13 12:30:00	2352.48
2014-01-13 13:00:00	2420.3
2014-01-13 13:30:00	2509.66
2014-01-13 14:00:00	2550.52
2014-01-13 14:30:00	2592.57
2014-01-13 15:00:00	2637.9
2014-01-13 15:30:00	2658.24
2014-01-13 16:00:00	2680.76
2014-01-13 16:30:00	2695.63
2014-01-13 17:00:00	2725.33
2014-01-13 17:30:00	2756.71
2014-01-13 18:00:00	2805.72
2014-01-13 18:30:00	2832.29
2014-01-13 19:00:00	2819.65
2014-01-13 19:30:00	2764.6
2014-01-13 20:00:00	2662.27
2014-01-13 20:30:00	2576.7
2014-01-13 21:00:00	2519.44
2014-01-13 21:30:00	2411.67
2014-01-13 22:00:00	2250.64
2014-01-13 22:30:00	2110
2014-01-13 23:00:00	2030.78
2014-01-13 23:30:00	1932.34
2014-01-14	2081.65
2014-01-14 00:30:00	1895.32
2014-01-14 01:00:00	1764.11
2014-01-14 01:30:00	1665.39
2014-01-14 02:00:00	1609.09
2014-01-14 02:30:00	1551.62
2014-01-14 03:00:00	1537.82
2014-01-14 03:30:00	1540.2
2014-01-14 04:00:00	1540.84
2014-01-14 04:30:00	1527.93
2014-01-14 05:00:00	1533.03
2014-01-14 05:30:00	1539.98
2014-01-14 06:00:00	1598.18
2014-01-14 06:30:00	1652.87
2014-01-14 07:00:00	1783.27
2014-01-14 07:30:00	1909.57
2014-01-14 08:00:00	2052.89
2014-01-14 08:30:00	2235.68
2014-01-14 09:00:00	2312.35
2014-01-14 09:30:00	2389.08
2014-01-14 10:00:00	2444.29
2014-01-14 10:30:00	2437.97
2014-01-14 11:00:00	2565.09
2014-01-14 11:30:00	2636.77
2014-01-14 12:00:00	2682.23
2014-01-14 12:30:00	2709.45
2014-01-14 13:00:00	2784.95
2014-01-14 13:30:00	2751.37
2014-01-14 14:00:00	2781.86
2014-01-14 14:30:00	2862.77
2014-01-14 15:00:00	2962.65
2014-01-14 15:30:00	2924.9
2014-01-14 16:00:00	2894.23
2014-01-14 16:30:00	2926.84
2014-01-14 17:00:00	2956.24
2014-01-14 17:30:00	2958.85
2014-01-14 18:00:00	2823.27
2014-01-14 18:30:00	2585.31
2014-01-14 19:00:00	2508.8
2014-01-14 19:30:00	2513.32
2014-01-14 20:00:00	2496.63
2014-01-14 20:30:00	2485.47
2014-01-14 21:00:00	2450.52
2014-01-14 21:30:00	2376.48
2014-01-14 22:00:00	2257.76
2014-01-14 22:30:00	2119.01
2014-01-14 23:00:00	2070.9
2014-01-14 23:30:00	2038.14
2014-01-15	2200.09
2014-01-15 00:30:00	1975.15
2014-01-15 01:00:00	1863.48
2014-01-15 01:30:00	1758.28
2014-01-15 02:00:00	1689.1
2014-01-15 02:30:00	1670.93
2014-01-15 03:00:00	1643.66
2014-01-15 03:30:00	1606.98
2014-01-15 04:00:00	1579.72
2014-01-15 04:30:00	1600.39
2014-01-15 05:00:00	1658.42
2014-01-15 05:30:00	1676.32
2014-01-15 06:00:00	1760.59
2014-01-15 06:30:00	1846.52
2014-01-15 07:00:00	1956.19
2014-01-15 07:30:00	2103.56
2014-01-15 08:00:00	2216.99
2014-01-15 08:30:00	2309.32
2014-01-15 09:00:00	2289.8
2014-01-15 09:30:00	2334.47
2014-01-15 10:00:00	2376.5
2014-01-15 10:30:00	2434.58
2014-01-15 11:00:00	2495.3
2014-01-15 11:30:00	2562.3
2014-01-15 12:00:00	2615.7
2014-01-15 12:30:00	2665.09
2014-01-15 13:00:00	2710.91
2014-01-15 13:30:00	2770.31
2014-01-15 14:00:00	2843.74
2014-01-15 14:30:00	2847.42
2014-01-15 15:00:00	2884.61
2014-01-15 15:30:00	2956.96
2014-01-15 16:00:00	2959.68
2014-01-15 16:30:00	2955.13
2014-01-15 17:00:00	2974.32
2014-01-15 17:30:00	3004.22
2014-01-15 18:00:00	3018.07
2014-01-15 18:30:00	2988.18
2014-01-15 19:00:00	2982.87
2014-01-15 19:30:00	2919.89
2014-01-15 20:00:00	2893.59
2014-01-15 20:30:00	2875.59
2014-01-15 21:00:00	2818.85
2014-01-15 21:30:00	2684.28
2014-01-15 22:00:00	2542.03
2014-01-15 22:30:00	2397.11
2014-01-15 23:00:00	2276.46
2014-01-15 23:30:00	2150.21
2014-01-16	2317.9
2014-01-16 00:30:00	2085.78
2014-01-16 01:00:00	1994.01
2014-01-16 01:30:00	1912.68
2014-01-16 02:00:00	1872.1
2014-01-16 02:30:00	1834.53
2014-01-16 03:00:00	1811.87
2014-01-16 03:30:00	1809.43
2014-01-16 04:00:00	1816.92
2014-01-16 04:30:00	1764.24
2014-01-16 05:00:00	1766.92
2014-01-16 05:30:00	1779.94
2014-01-16 06:00:00	1858.61
2014-01-16 06:30:00	1934.21
2014-01-16 07:00:00	2056.78
2014-01-16 07:30:00	2173.62
2014-01-16 08:00:00	2290.75
2014-01-16 08:30:00	2436.81
2014-01-16 09:00:00	2540.21
2014-01-16 09:30:00	2595.43
2014-01-16 10:00:00	2661.16
2014-01-16 10:30:00	2708.29
2014-01-16 11:00:00	2749.91
2014-01-16 11:30:00	2815.05
2014-01-16 12:00:00	2850.65
2014-01-16 12:30:00	2855.43
2014-01-16 13:00:00	2876.33
2014-01-16 13:30:00	2942.38
2014-01-16 14:00:00	2981.36
2014-01-16 14:30:00	2984.83
2014-01-16 15:00:00	2943.38
2014-01-16 15:30:00	2945.09
2014-01-16 16:00:00	2977.72
2014-01-16 16:30:00	3044.37
2014-01-16 17:00:00	3057.96
2014-01-16 17:30:00	3103.65
2014-01-16 18:00:00	3119.17
2014-01-16 18:30:00	3245.92
2014-01-16 19:00:00	3239.78
2014-01-16 19:30:00	3117.46
2014-01-16 20:00:00	2999.03
2014-01-16 20:30:00	2997.47
2014-01-16 21:00:00	3023.74
2014-01-16 21:30:00	2893.83
2014-01-16 22:00:00	2765.93
2014-01-16 22:30:00	2610.04
2014-01-16 23:00:00	2480.34
2014-01-16 23:30:00	2399.56
2014-01-17	2513.04
2014-01-17 00:30:00	2228.61
2014-01-17 01:00:00	2106.11
2014-01-17 01:30:00	1976.24
2014-01-17 02:00:00	1930.61
2014-01-17 02:30:00	1880.96
2014-01-17 03:00:00	1827.11
2014-01-17 03:30:00	1781.85
2014-01-17 04:00:00	1754.59
2014-01-17 04:30:00	1721.38
2014-01-17 05:00:00	1706.55
2014-01-17 05:30:00	1717.24
2014-01-17 06:00:00	1826.55
2014-01-17 06:30:00	1867.9
2014-01-17 07:00:00	2015.29
2014-01-17 07:30:00	2183.19
2014-01-17 08:00:00	2306.85
2014-01-17 08:30:00	2374.31
2014-01-17 09:00:00	2398.29
2014-01-17 09:30:00	2438.33
2014-01-17 10:00:00	2403.91
2014-01-17 10:30:00	2507.5
2014-01-17 11:00:00	2562.5
2014-01-17 11:30:00	2658.71
2014-01-17 12:00:00	2664.31
2014-01-17 12:30:00	2655.61
2014-01-17 13:00:00	2674.1
2014-01-17 13:30:00	2770.47
2014-01-17 14:00:00	2855.96
2014-01-17 14:30:00	2820.76
2014-01-17 15:00:00	2843.78
2014-01-17 15:30:00	2877.94
2014-01-17 16:00:00	2865.96
2014-01-17 16:30:00	2871.19
2014-01-17 17:00:00	2819.8
2014-01-17 17:30:00	2725.68
2014-01-17 18:00:00	2581.05
2014-01-17 18:30:00	2484.36
2014-01-17 19:00:00	2279.46
2014-01-17 19:30:00	2103.33
2014-01-17 20:00:00	1999.07
2014-01-17 20:30:00	2001.58
2014-01-17 21:00:00	1923.8
2014-01-17 21:30:00	1881.08
2014-01-17 22:00:00	1829.91
2014-01-17 22:30:00	1783.3
2014-01-17 23:00:00	1688.83
2014-01-17 23:30:00	1657.34
2014-01-18	1872.47
2014-01-18 00:30:00	1689.57
2014-01-18 01:00:00	1549.93
2014-01-18 01:30:00	1474.16
2014-01-18 02:00:00	1406.12
2014-01-18 02:30:00	1409.9
2014-01-18 03:00:00	1377.15
2014-01-18 03:30:00	1344.71
2014-01-18 04:00:00	1278.88
2014-01-18 04:30:00	1274.41
2014-01-18 05:00:00	1271.45
2014-01-18 05:30:00	1278.51
2014-01-18 06:00:00	1308.06
2014-01-18 06:30:00	1313.31
2014-01-18 07:00:00	1344.45
2014-01-18 07:30:00	1385.74
2014-01-18 08:00:00	1377.6
2014-01-18 08:30:00	1381.35
2014-01-18 09:00:00	1404.37
2014-01-18 09:30:00	1387.99
2014-01-18 10:00:00	1364.08
2014-01-18 10:30:00	1381.57
2014-01-18 11:00:00	1368.41
2014-01-18 11:30:00	1364.01
2014-01-18 12:00:00	1372.15
2014-01-18 12:30:00	1357.79
2014-01-18 13:00:00	1383.26
2014-01-18 13:30:00	1389.75
2014-01-18 14:00:00	1429.94
2014-01-18 14:30:00	1484.61
2014-01-18 15:00:00	1535.41
2014-01-18 15:30:00	1581.15
2014-01-18 16:00:00	1621.32
2014-01-18 16:30:00	1672.66
2014-01-18 17:00:00	1678.4
2014-01-18 17:30:00	1696.95
2014-01-18 18:00:00	1718.25
2014-01-18 18:30:00	1700.61
2014-01-18 19:00:00	1664.61
2014-01-18 19:30:00	1609.15
2014-01-18 20:00:00	1538.85
2014-01-18 20:30:00	1506.45
2014-01-18 21:00:00	1473.97
2014-01-18 21:30:00	1437.29
2014-01-18 22:00:00	1380.42
2014-01-18 22:30:00	1332.81
2014-01-18 23:00:00	1287.53
2014-01-18 23:30:00	1288.01
2014-01-19	1490.22
2014-01-19 00:30:00	1373.79
2014-01-19 01:00:00	1271.9
2014-01-19 01:30:00	1201.83
2014-01-19 02:00:00	1157.33
2014-01-19 02:30:00	1128.5
2014-01-19 03:00:00	1124.51
2014-01-19 03:30:00	1113.7
2014-01-19 04:00:00	1107.17
2014-01-19 04:30:00	1118.52
2014-01-19 05:00:00	1122.82
2014-01-19 05:30:00	1122.15
2014-01-19 06:00:00	1120.18
2014-01-19 06:30:00	1114.61
2014-01-19 07:00:00	1109.19
2014-01-19 07:30:00	1115.21
2014-01-19 08:00:00	1069.02
2014-01-19 08:30:00	1064.04
2014-01-19 09:00:00	1044.67
2014-01-19 09:30:00	1032.53
2014-01-19 10:00:00	1016.63
2014-01-19 10:30:00	1016.36
2014-01-19 11:00:00	1028.85
2014-01-19 11:30:00	1026.16
2014-01-19 12:00:00	1036.06
2014-01-19 12:30:00	1043.41
2014-01-19 13:00:00	1021.64
2014-01-19 13:30:00	1074.25
2014-01-19 14:00:00	1100.61
2014-01-19 14:30:00	1120.8
2014-01-19 15:00:00	1133.3
2014-01-19 15:30:00	1196.4
2014-01-19 16:00:00	1228.99
2014-01-19 16:30:00	1267.93
2014-01-19 17:00:00	1316.24
2014-01-19 17:30:00	1362.71
2014-01-19 18:00:00	1405.62
2014-01-19 18:30:00	1431.54
2014-01-19 19:00:00	1428.49
2014-01-19 19:30:00	1408.73
2014-01-19 20:00:00	1392.18
2014-01-19 20:30:00	1414.19
2014-01-19 21:00:00	1415.36
2014-01-19 21:30:00	1364.62
2014-01-19 22:00:00	1331.03
2014-01-19 22:30:00	1283.42
2014-01-19 23:00:00	1269.9
2014-01-19 23:30:00	1262.8
2014-01-20	1496.46
2014-01-20 00:30:00	1373.43
2014-01-20 01:00:00	1300.47
2014-01-20 01:30:00	1208.11
2014-01-20 02:00:00	1143.5
2014-01-20 02:30:00	1105.72
2014-01-20 03:00:00	1107.66
2014-01-20 03:30:00	1088.7
2014-01-20 04:00:00	1095.29
2014-01-20 04:30:00	1100.24
2014-01-20 05:00:00	1158.43
2014-01-20 05:30:00	1200.33
2014-01-20 06:00:00	1284.1
2014-01-20 06:30:00	1339.84
2014-01-20 07:00:00	1422.81
2014-01-20 07:30:00	1470.99
2014-01-20 08:00:00	1456.35
2014-01-20 08:30:00	1482.83
2014-01-20 09:00:00	1464.65
2014-01-20 09:30:00	1448.67
2014-01-20 10:00:00	1426.2
2014-01-20 10:30:00	1425.3
2014-01-20 11:00:00	1432.16
2014-01-20 11:30:00	1436.18
2014-01-20 12:00:00	1452.38
2014-01-20 12:30:00	1459.62
2014-01-20 13:00:00	1494.95
2014-01-20 13:30:00	1523.04
2014-01-20 14:00:00	1545.3
2014-01-20 14:30:00	1548.28
2014-01-20 15:00:00	1561.15
2014-01-20 15:30:00	1568.75
2014-01-20 16:00:00	1605.53
2014-01-20 16:30:00	1630.12
2014-01-20 17:00:00	1635.17
2014-01-20 17:30:00	1649.42
2014-01-20 18:00:00	1628.3
2014-01-20 18:30:00	1616
2014-01-20 19:00:00	1593.63
2014-01-20 19:30:00	1555.75
2014-01-20 20:00:00	1510.47
2014-01-20 20:30:00	1518.78
2014-01-20 21:00:00	1518.24
2014-01-20 21:30:00	1470.49
2014-01-20 22:00:00	1408.31
2014-01-20 22:30:00	1360.29
2014-01-20 23:00:00	1324.2
2014-01-20 23:30:00	1331.17
2014-01-21	1550.48
2014-01-21 00:30:00	1424.23
2014-01-21 01:00:00	1346.26
2014-01-21 01:30:00	1273.08
2014-01-21 02:00:00	1223.61
2014-01-21 02:30:00	1188.9
2014-01-21 03:00:00	1169.72
2014-01-21 03:30:00	1167.09
2014-01-21 04:00:00	1170.35
2014-01-21 04:30:00	1186.54
2014-01-21 05:00:00	1191.4
2014-01-21 05:30:00	1242.74
2014-01-21 06:00:00	1328.05
2014-01-21 06:30:00	1368.74
2014-01-21 07:00:00	1446.8
2014-01-21 07:30:00	1481.68
2014-01-21 08:00:00	1476.5
2014-01-21 08:30:00	1466.47
2014-01-21 09:00:00	1450.49
2014-01-21 09:30:00	1430.03
2014-01-21 10:00:00	1396.11
2014-01-21 10:30:00	1373.24
2014-01-21 11:00:00	1351.46
2014-01-21 11:30:00	1332.34
2014-01-21 12:00:00	1339.02
2014-01-21 12:30:00	1346.49
2014-01-21 13:00:00	1350.14
2014-01-21 13:30:00	1384.95
2014-01-21 14:00:00	1401.7
2014-01-21 14:30:00	1415.15
2014-01-21 15:00:00	1428.23
2014-01-21 15:30:00	1383.42
2014-01-21 16:00:00	1432.63
2014-01-21 16:30:00	1469.6
2014-01-21 17:00:00	1473.65
2014-01-21 17:30:00	1477.22
2014-01-21 18:00:00	1451.62
2014-01-21 18:30:00	1456.09
2014-01-21 19:00:00	1462.34
2014-01-21 19:30:00	1460.98
2014-01-21 20:00:00	1456.83
2014-01-21 20:30:00	1472.12
2014-01-21 21:00:00	1500.15
2014-01-21 21:30:00	1460.05
2014-01-21 22:00:00	1384.31
2014-01-21 22:30:00	1357.91
2014-01-21 23:00:00	1320.69
2014-01-21 23:30:00	1333.94
2014-01-22	1550.55
2014-01-22 00:30:00	1448.37
2014-01-22 01:00:00	1375.32
2014-01-22 01:30:00	1294.06
2014-01-22 02:00:00	1239.52
2014-01-22 02:30:00	1196.74
2014-01-22 03:00:00	1200.32
2014-01-22 03:30:00	1168.79
2014-01-22 04:00:00	1151.33
2014-01-22 04:30:00	1171.33
2014-01-22 05:00:00	1191.97
2014-01-22 05:30:00	1229.42
2014-01-22 06:00:00	1295.18
2014-01-22 06:30:00	1343.31
2014-01-22 07:00:00	1425.08
2014-01-22 07:30:00	1471.54
2014-01-22 08:00:00	1475.45
2014-01-22 08:30:00	1458.74
2014-01-22 09:00:00	1447.05
2014-01-22 09:30:00	1434.54
2014-01-22 10:00:00	1418.15
2014-01-22 10:30:00	1434.98
2014-01-22 11:00:00	1436.31
2014-01-22 11:30:00	1451.61
2014-01-22 12:00:00	1437.05
2014-01-22 12:30:00	1467.68
2014-01-22 13:00:00	1501.1
2014-01-22 13:30:00	1489.28
2014-01-22 14:00:00	1534.22
2014-01-22 14:30:00	1541.35
2014-01-22 15:00:00	1540.08
2014-01-22 15:30:00	1497.63
2014-01-22 16:00:00	1534.5
2014-01-22 16:30:00	1510.55
2014-01-22 17:00:00	1547.69
2014-01-22 17:30:00	1574.13
2014-01-22 18:00:00	1572.22
2014-01-22 18:30:00	1586.5
2014-01-22 19:00:00	1579.23
2014-01-22 19:30:00	1574.37
2014-01-22 20:00:00	1550.28
2014-01-22 20:30:00	1546.52
2014-01-22 21:00:00	1564.47
2014-01-22 21:30:00	1511.13
2014-01-22 22:00:00	1451.66
2014-01-22 22:30:00	1379.35
2014-01-22 23:00:00	1357.61
2014-01-22 23:30:00	1378.93
2014-01-23	1583.22
2014-01-23 00:30:00	1454.05
2014-01-23 01:00:00	1361.92
2014-01-23 01:30:00	1326.29
2014-01-23 02:00:00	1267.71
2014-01-23 02:30:00	1207.61
2014-01-23 03:00:00	1234.75
2014-01-23 03:30:00	1237.59
2014-01-23 04:00:00	1213.68
2014-01-23 04:30:00	1220.56
2014-01-23 05:00:00	1210.25
2014-01-23 05:30:00	1248.16
2014-01-23 06:00:00	1335.03
2014-01-23 06:30:00	1414.12
2014-01-23 07:00:00	1483.8
2014-01-23 07:30:00	1530.3
2014-01-23 08:00:00	1580.42
2014-01-23 08:30:00	1608.54
2014-01-23 09:00:00	1617.61
2014-01-23 09:30:00	1601.44
2014-01-23 10:00:00	1607.36
2014-01-23 10:30:00	1620.52
2014-01-23 11:00:00	1649.83
2014-01-23 11:30:00	1670.81
2014-01-23 12:00:00	1725.36
2014-01-23 12:30:00	1767.76
2014-01-23 13:00:00	1825.32
2014-01-23 13:30:00	1862.68
2014-01-23 14:00:00	1902.51
2014-01-23 14:30:00	1973.19
2014-01-23 15:00:00	2034.65
2014-01-23 15:30:00	2078.43
2014-01-23 16:00:00	2060.77
2014-01-23 16:30:00	2045.7
2014-01-23 17:00:00	2049.98
2014-01-23 17:30:00	2015.11
2014-01-23 18:00:00	1991.49
2014-01-23 18:30:00	1952.53
2014-01-23 19:00:00	1900.09
2014-01-23 19:30:00	1837.43
2014-01-23 20:00:00	1833.85
2014-01-23 20:30:00	1864.32
2014-01-23 21:00:00	1802.91
2014-01-23 21:30:00	1758.94
2014-01-23 22:00:00	1695.45
2014-01-23 22:30:00	1635.19
2014-01-23 23:00:00	1599.27
2014-01-23 23:30:00	1562.49
2014-01-24	1772.06
2014-01-24 00:30:00	1618.31
2014-01-24 01:00:00	1531
2014-01-24 01:30:00	1463.62
2014-01-24 02:00:00	1416.4
2014-01-24 02:30:00	1386.38
2014-01-24 03:00:00	1373.46
2014-01-24 03:30:00	1371.04
2014-01-24 04:00:00	1355.35
2014-01-24 04:30:00	1360.43
2014-01-24 05:00:00	1382.09
2014-01-24 05:30:00	1410.79
2014-01-24 06:00:00	1461.25
2014-01-24 06:30:00	1498.78
2014-01-24 07:00:00	1586.43
2014-01-24 07:30:00	1665.36
2014-01-24 08:00:00	1698.68
2014-01-24 08:30:00	1737.35
2014-01-24 09:00:00	1759.36
2014-01-24 09:30:00	1704.17
2014-01-24 10:00:00	1660.45
2014-01-24 10:30:00	1593.32
2014-01-24 11:00:00	1554.56
2014-01-24 11:30:00	1544.78
2014-01-24 12:00:00	1539.34
2014-01-24 12:30:00	1504.31
2014-01-24 13:00:00	1493.84
2014-01-24 13:30:00	1462.82
2014-01-24 14:00:00	1456.2
2014-01-24 14:30:00	1429.11
2014-01-24 15:00:00	1406.33
2014-01-24 15:30:00	1444.25
2014-01-24 16:00:00	1439.28
2014-01-24 16:30:00	1454.19
2014-01-24 17:00:00	1420.81
2014-01-24 17:30:00	1427.42
2014-01-24 18:00:00	1428.67
2014-01-24 18:30:00	1392.57
2014-01-24 19:00:00	1410.65
2014-01-24 19:30:00	1386.01
2014-01-24 20:00:00	1394.69
2014-01-24 20:30:00	1416.92
2014-01-24 21:00:00	1449.4
2014-01-24 21:30:00	1451.11
2014-01-24 22:00:00	1354.64
2014-01-24 22:30:00	1318.88
2014-01-24 23:00:00	1306.24
2014-01-24 23:30:00	1310.48
2014-01-25	1520.51
2014-01-25 00:30:00	1379.55
2014-01-25 01:00:00	1318.46
2014-01-25 01:30:00	1237.12
2014-01-25 02:00:00	1148.56
2014-01-25 02:30:00	1132.42
2014-01-25 03:00:00	1093.55
2014-01-25 03:30:00	1083.76
2014-01-25 04:00:00	1089.91
2014-01-25 04:30:00	1072.92
2014-01-25 05:00:00	1091.5
2014-01-25 05:30:00	1113.55
2014-01-25 06:00:00	1128.5
2014-01-25 06:30:00	1121.75
2014-01-25 07:00:00	1174.17
2014-01-25 07:30:00	1183.51
2014-01-25 08:00:00	1163.75
2014-01-25 08:30:00	1151.62
2014-01-25 09:00:00	1138.68
2014-01-25 09:30:00	1111.59
2014-01-25 10:00:00	1081.29
2014-01-25 10:30:00	1043.82
2014-01-25 11:00:00	1024.44
2014-01-25 11:30:00	1029.68
2014-01-25 12:00:00	1018.28
2014-01-25 12:30:00	1010.03
2014-01-25 13:00:00	1007.43
2014-01-25 13:30:00	981.17
2014-01-25 14:00:00	1019.6
2014-01-25 14:30:00	1024.89
2014-01-25 15:00:00	1032.23
2014-01-25 15:30:00	1071.21
2014-01-25 16:00:00	1125.41
2014-01-25 16:30:00	1176.12
2014-01-25 17:00:00	1244.34
2014-01-25 17:30:00	1288.5
2014-01-25 18:00:00	1352.52
2014-01-25 18:30:00	1379.34
2014-01-25 19:00:00	1391.7
2014-01-25 19:30:00	1383.03
2014-01-25 20:00:00	1381.6
2014-01-25 20:30:00	1384.38
2014-01-25 21:00:00	1385.6
2014-01-25 21:30:00	1356.45
2014-01-25 22:00:00	1311.69
2014-01-25 22:30:00	1297.04
2014-01-25 23:00:00	1287.02
2014-01-25 23:30:00	1289.73
2014-01-26	1517.64
2014-01-26 00:30:00	1387.2
2014-01-26 01:00:00	1314.38
2014-01-26 01:30:00	1221.11
2014-01-26 02:00:00	1159.18
2014-01-26 02:30:00	1128.25
2014-01-26 03:00:00	1104.6
2014-01-26 03:30:00	1087.53
2014-01-26 04:00:00	1108.7
2014-01-26 04:30:00	1077.43
2014-01-26 05:00:00	1088.12
2014-01-26 05:30:00	1106.21
2014-01-26 06:00:00	1126.27
2014-01-26 06:30:00	1111.23
2014-01-26 07:00:00	1132.19
2014-01-26 07:30:00	1178.33
2014-01-26 08:00:00	1150.42
2014-01-26 08:30:00	1147.16
2014-01-26 09:00:00	1122.94
2014-01-26 09:30:00	1123.16
2014-01-26 10:00:00	1119.74
2014-01-26 10:30:00	1134.78
2014-01-26 11:00:00	1140.2
2014-01-26 11:30:00	1157.29
2014-01-26 12:00:00	1175.79
2014-01-26 12:30:00	1182.82
2014-01-26 13:00:00	1211.67
2014-01-26 13:30:00	1246.88
2014-01-26 14:00:00	1286.06
2014-01-26 14:30:00	1326.97
2014-01-26 15:00:00	1400.49
2014-01-26 15:30:00	1466.43
2014-01-26 16:00:00	1534.29
2014-01-26 16:30:00	1617.22
2014-01-26 17:00:00	1659.44
2014-01-26 17:30:00	1697.54
2014-01-26 18:00:00	1741.11
2014-01-26 18:30:00	1784.5
2014-01-26 19:00:00	1811.58
2014-01-26 19:30:00	1799.56
2014-01-26 20:00:00	1740.3
2014-01-26 20:30:00	1676.73
2014-01-26 21:00:00	1657.85
2014-01-26 21:30:00	1591.66
2014-01-26 22:00:00	1525.89
2014-01-26 22:30:00	1447.57
2014-01-26 23:00:00	1433.79
2014-01-26 23:30:00	1421.02
2014-01-27	1614.84
2014-01-27 00:30:00	1477.42
2014-01-27 01:00:00	1390.17
2014-01-27 01:30:00	1324.78
2014-01-27 02:00:00	1258.65
2014-01-27 02:30:00	1210.75
2014-01-27 03:00:00	1212.87
2014-01-27 03:30:00	1189.62
2014-01-27 04:00:00	1159.83
2014-01-27 04:30:00	1163.94
2014-01-27 05:00:00	1164.19
2014-01-27 05:30:00	1193.69
2014-01-27 06:00:00	1209.31
2014-01-27 06:30:00	1200.48
2014-01-27 07:00:00	1191.27
2014-01-27 07:30:00	1184.51
2014-01-27 08:00:00	1204.26
2014-01-27 08:30:00	1239.79
2014-01-27 09:00:00	1306.94
2014-01-27 09:30:00	1356.08
2014-01-27 10:00:00	1418.21
2014-01-27 10:30:00	1458.42
2014-01-27 11:00:00	1546.3
2014-01-27 11:30:00	1618.94
2014-01-27 12:00:00	1668.65
2014-01-27 12:30:00	1720.7
2014-01-27 13:00:00	1784.61
2014-01-27 13:30:00	1851.5
2014-01-27 14:00:00	1901.58
2014-01-27 14:30:00	1954.98
2014-01-27 15:00:00	2023.26
2014-01-27 15:30:00	2107.6
2014-01-27 16:00:00	2203.55
2014-01-27 16:30:00	2277.73
2014-01-27 17:00:00	2378.95
2014-01-27 17:30:00	2460.29
2014-01-27 18:00:00	2518.85
2014-01-27 18:30:00	2542.98
2014-01-27 19:00:00	2535.02
2014-01-27 19:30:00	2500.2
2014-01-27 20:00:00	2394.47
2014-01-27 20:30:00	2327.58
2014-01-27 21:00:00	2242.29
2014-01-27 21:30:00	2135.3
2014-01-27 22:00:00	1987.85
2014-01-27 22:30:00	1866.02
2014-01-27 23:00:00	1757.03
2014-01-27 23:30:00	1727.34
2014-01-28	1896.6
2014-01-28 00:30:00	1721.57
2014-01-28 01:00:00	1624.89
2014-01-28 01:30:00	1523.65
2014-01-28 02:00:00	1434.25
2014-01-28 02:30:00	1381.24
2014-01-28 03:00:00	1349.32
2014-01-28 03:30:00	1327.46
2014-01-28 04:00:00	1326.29
2014-01-28 04:30:00	1271.09
2014-01-28 05:00:00	1267.59
2014-01-28 05:30:00	1332.43
2014-01-28 06:00:00	1417.73
2014-01-28 06:30:00	1489.37
2014-01-28 07:00:00	1635.09
2014-01-28 07:30:00	1760.38
2014-01-28 08:00:00	1835.92
2014-01-28 08:30:00	1947.27
2014-01-28 09:00:00	2018.35
2014-01-28 09:30:00	2068.73
2014-01-28 10:00:00	2167.03
2014-01-28 10:30:00	2225
2014-01-28 11:00:00	2294.72
2014-01-28 11:30:00	2412.02
2014-01-28 12:00:00	2479.42
2014-01-28 12:30:00	2583.45
2014-01-28 13:00:00	2634.23
2014-01-28 13:30:00	2624.7
2014-01-28 14:00:00	2666.87
2014-01-28 14:30:00	2644.59
2014-01-28 15:00:00	2675.03
2014-01-28 15:30:00	2701.77
2014-01-28 16:00:00	2755.25
2014-01-28 16:30:00	2755.01
2014-01-28 17:00:00	2781.2
2014-01-28 17:30:00	2730.91
2014-01-28 18:00:00	2732.89
2014-01-28 18:30:00	2718.51
2014-01-28 19:00:00	2657.69
2014-01-28 19:30:00	2579.57
2014-01-28 20:00:00	2458.33
2014-01-28 20:30:00	2337.28
2014-01-28 21:00:00	2222.51
2014-01-28 21:30:00	2064.75
2014-01-28 22:00:00	1930.84
2014-01-28 22:30:00	1776.65
2014-01-28 23:00:00	1676.3
2014-01-28 23:30:00	1599.59
2014-01-29	1767.59
2014-01-29 00:30:00	1566.95
2014-01-29 01:00:00	1498.65
2014-01-29 01:30:00	1397.51
2014-01-29 02:00:00	1348.96
2014-01-29 02:30:00	1309.81
2014-01-29 03:00:00	1298.57
2014-01-29 03:30:00	1289.91
2014-01-29 04:00:00	1297.84
2014-01-29 04:30:00	1305.74
2014-01-29 05:00:00	1316.43
2014-01-29 05:30:00	1350.15
2014-01-29 06:00:00	1431.08
2014-01-29 06:30:00	1464.77
2014-01-29 07:00:00	1569.22
2014-01-29 07:30:00	1648.9
2014-01-29 08:00:00	1606.44
2014-01-29 08:30:00	1606.89
2014-01-29 09:00:00	1605.14
2014-01-29 09:30:00	1603.84
2014-01-29 10:00:00	1574.19
2014-01-29 10:30:00	1572.64
2014-01-29 11:00:00	1569.28
2014-01-29 11:30:00	1596.72
2014-01-29 12:00:00	1619.28
2014-01-29 12:30:00	1637.17
2014-01-29 13:00:00	1694.26
2014-01-29 13:30:00	1724.95
2014-01-29 14:00:00	1781.73
2014-01-29 14:30:00	1806.17
2014-01-29 15:00:00	1812.32
2014-01-29 15:30:00	1851.63
2014-01-29 16:00:00	1949.76
2014-01-29 16:30:00	1997.16
2014-01-29 17:00:00	2039.64
2014-01-29 17:30:00	2030.01
2014-01-29 18:00:00	2003.93
2014-01-29 18:30:00	1987.15
2014-01-29 19:00:00	1949.55
2014-01-29 19:30:00	1884.97
2014-01-29 20:00:00	1822.24
2014-01-29 20:30:00	1796.99
2014-01-29 21:00:00	1768.66
2014-01-29 21:30:00	1714.7
2014-01-29 22:00:00	1646.35
2014-01-29 22:30:00	1592.67
2014-01-29 23:00:00	1543.03
2014-01-29 23:30:00	1508.05
2014-01-30	1731.06
2014-01-30 00:30:00	1593.56
2014-01-30 01:00:00	1506.07
2014-01-30 01:30:00	1430.62
2014-01-30 02:00:00	1365.53
2014-01-30 02:30:00	1322.4
2014-01-30 03:00:00	1334.33
2014-01-30 03:30:00	1348.16
2014-01-30 04:00:00	1351.26
2014-01-30 04:30:00	1375.15
2014-01-30 05:00:00	1402.64
2014-01-30 05:30:00	1440.75
2014-01-30 06:00:00	1507.65
2014-01-30 06:30:00	1559.95
2014-01-30 07:00:00	1678.53
2014-01-30 07:30:00	1787.23
2014-01-30 08:00:00	1828.62
2014-01-30 08:30:00	1854.35
2014-01-30 09:00:00	1919.84
2014-01-30 09:30:00	1951.55
2014-01-30 10:00:00	1963.15
2014-01-30 10:30:00	1959.94
2014-01-30 11:00:00	1997.75
2014-01-30 11:30:00	2049.67
2014-01-30 12:00:00	2134.49
2014-01-30 12:30:00	2159.92
2014-01-30 13:00:00	2209.33
2014-01-30 13:30:00	2260.14
2014-01-30 14:00:00	2286.48
2014-01-30 14:30:00	2316.71
2014-01-30 15:00:00	2332.9
2014-01-30 15:30:00	2382.43
2014-01-30 16:00:00	2433.47
2014-01-30 16:30:00	2473.99
2014-01-30 17:00:00	2513.44
2014-01-30 17:30:00	2528.62
2014-01-30 18:00:00	2521.02
2014-01-30 18:30:00	2472.56
2014-01-30 19:00:00	2428.17
2014-01-30 19:30:00	2381.06
2014-01-30 20:00:00	2281.56
2014-01-30 20:30:00	2229.27
2014-01-30 21:00:00	2161.48
2014-01-30 21:30:00	2053.1
2014-01-30 22:00:00	1940.7
2014-01-30 22:30:00	1815.14
2014-01-30 23:00:00	1732.32
2014-01-30 23:30:00	1684.52
2014-01-31	1854.29
2014-01-31 00:30:00	1693.84
2014-01-31 01:00:00	1585.53
2014-01-31 01:30:00	1473.69
2014-01-31 02:00:00	1396.87
2014-01-31 02:30:00	1391.27
2014-01-31 03:00:00	1387.52
2014-01-31 03:30:00	1373.58
2014-01-31 04:00:00	1365
2014-01-31 04:30:00	1373.83
2014-01-31 05:00:00	1392.3
2014-01-31 05:30:00	1422.84
2014-01-31 06:00:00	1517.85
2014-01-31 06:30:00	1590.77
2014-01-31 07:00:00	1706.79
2014-01-31 07:30:00	1824.25
2014-01-31 08:00:00	1837.9
2014-01-31 08:30:00	1853
2014-01-31 09:00:00	1910.73
2014-01-31 09:30:00	1953.59
2014-01-31 10:00:00	1976.14
2014-01-31 10:30:00	1999.83
2014-01-31 11:00:00	2025.81
2014-01-31 11:30:00	2102.86
2014-01-31 12:00:00	2151.76
2014-01-31 12:30:00	2220.22
2014-01-31 13:00:00	2262.16
2014-01-31 13:30:00	2299.93
2014-01-31 14:00:00	2375.48
2014-01-31 14:30:00	2410.28
2014-01-31 15:00:00	2464.73
2014-01-31 15:30:00	2524.21
2014-01-31 16:00:00	2586.47
2014-01-31 16:30:00	2649.73
2014-01-31 17:00:00	2656.9
2014-01-31 17:30:00	2701.98
2014-01-31 18:00:00	2665.95
2014-01-31 18:30:00	2638.1
2014-01-31 19:00:00	2610.16
2014-01-31 19:30:00	2520.33
2014-01-31 20:00:00	2440.6
2014-01-31 20:30:00	2398.63
2014-01-31 21:00:00	2315
2014-01-31 21:30:00	2232.88
2014-01-31 22:00:00	2101.43
2014-01-31 22:30:00	2029.71
2014-01-31 23:00:00	1926.76
2014-01-31 23:30:00	1852.98
2014-02-01	1982.56

[truncated: 11 more sheets: SA-Apr, SA-Jul, SA-Oct, TAS-Jan, TAS-Apr, TAS-Jul, TAS-Oct, VIC-Jan, VIC-Apr, VIC-Jul, VIC-Oct]
